# Supplementary material for: Cappable-Seq Reveals Specific Patterns of Metabolism and Virulence for Salmonella Typhimurium Intracellular Survival within Acanthamoeba castellanii
Source: Int J Mol Sci. 2021 Aug 23;22(16):9077. doi: 10.3390/ijms22169077 (PMC8396566; doi:10.3390/ijms22169077)
Supplement: Supplementary file 1 [file ijms-22-09077-s001.zip]

Archive with 6 entries (6 files):
- Fig S1.tif
- Fig S2.tif
- Supplementary #1_RNA-Seq_Stat.xlsx
- Supplementary #2 TSS-stat.xlsx
- Supplementary #3 Differential expression of operons.xlsx
- Supplementary description.pdf
