# Supplementary material for: Cappable-Seq Reveals Specific Patterns of Metabolism and Virulence for Salmonella Typhimurium Intracellular Survival within Acanthamoeba castellanii
Source: Int J Mol Sci. 2021 Aug 23;22(16):9077. doi: 10.3390/ijms22169077 (PMC8396566; doi:10.3390/ijms22169077)
Supplement: Supplementary file 1 [file ijms-22-09077-s001.zip › Supplementary #1_RNA-Seq_Stat.xlsx]

## Sheet: Лист1
Dataset S1: RNA-seq statistics
			Reads, mapped to representative rRNA database
Library	Total reads	Reads, mapped to adapters	16S	23S	18S	28S	5S	5.8S	Other reads	Salmonella	%	Amoeba+undefined	%
S21	11806575	3902	1390354	2980174	0	1180	151074	0	7280198	7232982	99.35	47216	0.65
S22	13333085	4032	1.84208e+06	3.71881e+06	1332.91	1332.91	302570	0	7464578	7410544	99.28	54034	0.72
S23	12293262	4008	1.96505e+06	3.84777e+06	0	0	164676	0	6310962	6272584	99.39	38378	0.61
SA27	11797894	11566	117863	307623	1.17392e+06	1.70666e+06	28287.2	2.19815e+06	6241403	633341	10.15	5608062	89.85
SA28	9986483	17341	216330	767624	603133	1.03181e+06	25919.8	1.72167e+06	5595192	1104498	19.74	4490694	80.26
SA29	12095714	18870	177530	582104	679926	1.36951e+06	28984.4	2.31875e+06	6910792	1189974	17.22	5720818	82.78
		Reads, mapped to representative rRNA database
Library	Adapters	16S rRNA	23S rRNA	18S rRNA	28S rRNA	5S rRNA	5.8S rRNA	Salmonella	Amoeba+undefined
S21	0.0330485	11.7758	25.241	0	0.00999417	1.27954	0	61.2607	0.399902
S22	0.0302368	13.8141	27.8881	0.00999575	0.00999575	2.26903	0	55.5733	0.405213
S23	0.0326053	15.9858	31.3018	0	0	1.33965	0	51.0279	0.312208
SA27	0.0981378	1.00007	2.61019	9.96072	14.4811	0.240017	18.6514	5.37391	47.5845
SA28	0.173775	2.16785	7.69238	6.04401	10.3398	0.259743	17.2529	11.0682	45.0014
SA29	0.156125	1.46883	4.81616	5.62551	11.331	0.239809	19.1847	9.8455	47.3324
															`
