# Supplementary material for: Cappable-Seq Reveals Specific Patterns of Metabolism and Virulence for Salmonella Typhimurium Intracellular Survival within Acanthamoeba castellanii
Source: Int J Mol Sci. 2021 Aug 23;22(16):9077. doi: 10.3390/ijms22169077 (PMC8396566; doi:10.3390/ijms22169077)
Supplement: Supplementary file 1 [file ijms-22-09077-s001.zip › Supplementary #2 TSS-stat.xlsx]

## Sheet: TSS stat
Dataset S2: TSS table
TSS, revield in the genome of Salmonella enterica serovar Typhimurium 14028S ant their statistic and classification, according to closest gene position
TSS type	Total number of TSS, revield in Salmonella control culture libraries	Salmonella	Total number of TSS, revield in Amoeba infected with Salmonella libraries	Salmonella — Amoeba
Intra_S	6328	51.1271	2109	43.306
Inter_S	2663	21.5157	1667	34.23
Intra_A	2272	18.3566	659	13.5318
Inter_A	1114	9.00057	436	8.95277
Total	12377		4870

## Sheet: TSS_S
Dataset S3: TSS, revield in libraries of control Salmonella culturies
The TSS, its position and strand are listed in the first three columns.
The closest feature to each TSS, its start, stop, strand and id are listed in the columns 5-8.
Distance from TSS to first nucleotid in ORF of closest feature is presented in the column "Distance".
The columns "Position on gene" and "Orientation" indicate classification of TSS, according to closest genome feature
TSS_id	position	strand	feature	start	stop	strand	Gene_id	Distance	Position on gene	Orientation
NC_016855.1_7	7	+	gene	94	378	+	STM14_5526	87	Intergenic	Sense
NC_016855.1_621	621	-	gene	391	546	+	STM14_RS00010	-75	Intergenic	Antisense
NC_016855.1_641	641	-	pseudogene	712	1154	+	STM14_RS00015	71	Intergenic	Antisense
NC_016855.1_643	643	-	pseudogene	712	1154	+	STM14_RS00015	69	Intergenic	Antisense
NC_016855.1_657	657	-	pseudogene	712	1154	+	STM14_RS00015	55	Intergenic	Antisense
NC_016855.1_677	677	+	pseudogene	712	1154	+	STM14_RS00015	35	Intergenic	Sense
NC_016855.1_1322	1322	+	gene	1333	1599	+	STM14_5528	11	Intergenic	Sense
NC_016855.1_1399	1399	-	gene	1333	1599	+	STM14_5528	0	Intragenic	Antisense
NC_016855.1_1498	1498	+	gene	1333	1599	+	STM14_5528	0	Intragenic	Sense
NC_016855.1_1577	1577	+	gene	1333	1599	+	STM14_5528	0	Intragenic	Sense
NC_016855.1_1662	1662	+	gene	1722	1844	+	STM14_RS00025	60	Intergenic	Sense
NC_016855.1_1671	1671	+	gene	1722	1844	+	STM14_RS00025	51	Intergenic	Sense
NC_016855.1_1767	1767	+	gene	1722	1844	+	STM14_RS00025	0	Intragenic	Sense
NC_016855.1_1768	1768	+	gene	1722	1844	+	STM14_RS00025	0	Intragenic	Sense
NC_016855.1_1831	1831	-	gene	1722	1844	+	STM14_RS00025	0	Intragenic	Antisense
NC_016855.1_2162	2162	-	gene	1907	2788	+	STM14_5531	0	Intragenic	Antisense
NC_016855.1_2572	2572	+	gene	1907	2788	+	STM14_5531	0	Intragenic	Sense
NC_016855.1_3192	3192	-	gene	2800	3015	+	STM14_RS24260	-177	Intergenic	Antisense
NC_016855.1_3581	3581	-	gene	3690	3869	+	STM14_RS24265	109	Intergenic	Antisense
NC_016855.1_3606	3606	-	gene	3690	3869	+	STM14_RS24265	84	Intergenic	Antisense
NC_016855.1_3617	3617	-	gene	3690	3869	+	STM14_RS24265	73	Intergenic	Antisense
NC_016855.1_3961	3961	-	gene	3966	4724	-	STM14_5533	5	Intergenic	Sense
NC_016855.1_3978	3978	+	gene	3966	4724	-	STM14_5533	0	Intragenic	Antisense
NC_016855.1_4042	4042	+	gene	3966	4724	-	STM14_5533	0	Intragenic	Antisense
NC_016855.1_4065	4065	+	gene	3966	4724	-	STM14_5533	0	Intragenic	Antisense
NC_016855.1_4260	4260	-	gene	3966	4724	-	STM14_5533	0	Intragenic	Sense
NC_016855.1_4309	4309	+	gene	3966	4724	-	STM14_5533	0	Intragenic	Antisense
NC_016855.1_4623	4623	-	gene	3966	4724	-	STM14_5533	0	Intragenic	Sense
NC_016855.1_4936	4936	+	gene	4991	5548	-	STM14_5534	55	Intergenic	Antisense
NC_016855.1_5083	5083	-	gene	4991	5548	-	STM14_5534	0	Intragenic	Sense
NC_016855.1_6381	6381	+	gene	5638	6537	-	STM14_5535	0	Intragenic	Antisense
NC_016855.1_6860	6860	+	gene	6670	7323	-	STM14_5536	0	Intragenic	Antisense
NC_016855.1_6886	6886	+	gene	6670	7323	-	STM14_5536	0	Intragenic	Antisense
NC_016855.1_7491	7491	-	gene	7568	7918	-	STM14_5537	77	Intergenic	Sense
NC_016855.1_8110	8110	+	gene	7903	8115	-	STM14_5538	0	Intragenic	Antisense
NC_016855.1_8155	8155	-	gene	7903	8115	-	STM14_5538	-40	Intergenic	Sense
NC_016855.1_8640	8640	+	gene	8547	9422	-	STM14_5539	0	Intragenic	Antisense
NC_016855.1_8806	8806	+	gene	8547	9422	-	STM14_5539	0	Intragenic	Antisense
NC_016855.1_8901	8901	+	gene	8547	9422	-	STM14_5539	0	Intragenic	Antisense
NC_016855.1_9048	9048	-	gene	8547	9422	-	STM14_5539	0	Intragenic	Sense
NC_016855.1_9177	9177	-	gene	8547	9422	-	STM14_5539	0	Intragenic	Sense
NC_016855.1_9225	9225	+	gene	8547	9422	-	STM14_5539	0	Intragenic	Antisense
NC_016855.1_9276	9276	-	gene	8547	9422	-	STM14_5539	0	Intragenic	Sense
NC_016855.1_9350	9350	+	gene	8547	9422	-	STM14_5539	0	Intragenic	Antisense
NC_016855.1_9753	9753	+	gene	9675	10232	-	STM14_5540	0	Intragenic	Antisense
NC_016855.1_9809	9809	-	gene	9675	10232	-	STM14_5540	0	Intragenic	Sense
NC_016855.1_9810	9810	-	gene	9675	10232	-	STM14_5540	0	Intragenic	Sense
NC_016855.1_9830	9830	-	gene	9675	10232	-	STM14_5540	0	Intragenic	Sense
NC_016855.1_9957	9957	-	gene	9675	10232	-	STM14_5540	0	Intragenic	Sense
NC_016855.1_10045	10045	-	gene	9675	10232	-	STM14_5540	0	Intragenic	Sense
NC_016855.1_11874	11874	-	gene	10932	13340	-	STM14_5542	0	Intragenic	Sense
NC_016855.1_12302	12302	+	gene	10932	13340	-	STM14_5542	0	Intragenic	Antisense
NC_016855.1_13418	13418	+	gene	10932	13340	-	STM14_5542	-78	Intergenic	Antisense
NC_016855.1_15554	15554	+	pseudogene	15382	15763	+	STM14_RS00100	0	Intragenic	Sense
NC_016855.1_15701	15701	+	pseudogene	15382	15763	+	STM14_RS00100	0	Intragenic	Sense
NC_016855.1_15737	15737	+	pseudogene	15382	15763	+	STM14_RS00100	0	Intragenic	Sense
NC_016855.1_16521	16521	+	gene	16635	17624	-	STM14_5546	114	Intergenic	Antisense
NC_016855.1_16663	16663	-	gene	16635	17624	-	STM14_5546	0	Intragenic	Sense
NC_016855.1_16673	16673	-	gene	16635	17624	-	STM14_5546	0	Intragenic	Sense
NC_016855.1_17083	17083	+	gene	16635	17624	-	STM14_5546	0	Intragenic	Antisense
NC_016855.1_17119	17119	-	gene	16635	17624	-	STM14_5546	0	Intragenic	Sense
NC_016855.1_17131	17131	-	gene	16635	17624	-	STM14_5546	0	Intragenic	Sense
NC_016855.1_17136	17136	+	gene	16635	17624	-	STM14_5546	0	Intragenic	Antisense
NC_016855.1_17137	17137	+	gene	16635	17624	-	STM14_5546	0	Intragenic	Antisense
NC_016855.1_17225	17225	+	gene	16635	17624	-	STM14_5546	0	Intragenic	Antisense
NC_016855.1_17402	17402	-	gene	16635	17624	-	STM14_5546	0	Intragenic	Sense
NC_016855.1_17698	17698	-	gene	16635	17624	-	STM14_5546	-74	Intergenic	Sense
NC_016855.1_17735	17735	-	gene	16635	17624	-	STM14_5546	-111	Intergenic	Sense
NC_016855.1_17776	17776	-	gene	16635	17624	-	STM14_5546	-152	Intergenic	Sense
NC_016855.1_17817	17817	-	gene	16635	17624	-	STM14_5546	-193	Intergenic	Sense
NC_016855.1_17883	17883	+	gene	18118	18414	-	STM14_5548	235	Intergenic	Antisense
NC_016855.1_17957	17957	-	gene	18118	18414	-	STM14_5548	161	Intergenic	Sense
NC_016855.1_17972	17972	+	gene	18118	18414	-	STM14_5548	146	Intergenic	Antisense
NC_016855.1_18206	18206	+	gene	18118	18414	-	STM14_5548	0	Intragenic	Antisense
NC_016855.1_18441	18441	-	gene	18118	18414	-	STM14_5548	-27	Intergenic	Sense
NC_016855.1_18539	18539	-	pseudogene	18534	18764	+	STM14_RS24280	0	Intragenic	Antisense
NC_016855.1_19132	19132	-	gene	18898	19419	-	STM14_5549	0	Intragenic	Sense
NC_016855.1_19144	19144	+	gene	18898	19419	-	STM14_5549	0	Intragenic	Antisense
NC_016855.1_19316	19316	-	gene	18898	19419	-	STM14_5549	0	Intragenic	Sense
NC_016855.1_19433	19433	-	gene	18898	19419	-	STM14_5549	-14	Intergenic	Sense
NC_016855.1_19751	19751	+	gene	18898	19419	-	STM14_5549	-332	Intergenic	Antisense
NC_016855.1_20064	20064	+	gene	20095	20313	+	STM14_5550	31	Intergenic	Sense
NC_016855.1_20342	20342	+	gene	20315	20620	+	STM14_5551	0	Intragenic	Sense
NC_016855.1_22138	22138	-	gene	21465	22247	+	STM14_5554	0	Intragenic	Antisense
NC_016855.1_22238	22238	+	gene	21465	22247	+	STM14_5554	0	Intragenic	Sense
NC_016855.1_24128	24128	-	gene	23476	23961	+	STM14_5556	-167	Intergenic	Antisense
NC_016855.1_25680	25680	-	gene	25308	25658	-	STM14_5558	-22	Intergenic	Sense
NC_016855.1_25772	25772	+	pseudogene	25715	26139	+	STM14_RS24290	0	Intragenic	Sense
NC_016855.1_25800	25800	+	pseudogene	25715	26139	+	STM14_RS24290	0	Intragenic	Sense
NC_016855.1_25811	25811	+	pseudogene	25715	26139	+	STM14_RS24290	0	Intragenic	Sense
NC_016855.1_26100	26100	+	pseudogene	25715	26139	+	STM14_RS24290	0	Intragenic	Sense
NC_016855.1_26222	26222	-	gene	26266	26916	-	STM14_5560	44	Intergenic	Sense
NC_016855.1_29936	29936	+	gene	28183	29958	-	STM14_5562	0	Intragenic	Antisense
NC_016855.1_30012	30012	+	gene	28183	29958	-	STM14_5562	-54	Intergenic	Antisense
NC_016855.1_30075	30075	+	gene	30140	30907	-	STM14_5563	65	Intergenic	Antisense
NC_016855.1_30291	30291	+	gene	30140	30907	-	STM14_5563	0	Intragenic	Antisense
NC_016855.1_31038	31038	+	gene	31081	31245	-	STM14_RS00205	43	Intergenic	Antisense
NC_016855.1_31926	31926	+	gene	31419	32312	-	STM14_5564	0	Intragenic	Antisense
NC_016855.1_32077	32077	-	gene	31419	32312	-	STM14_5564	0	Intragenic	Sense
NC_016855.1_32518	32518	+	gene	31419	32312	-	STM14_5564	-206	Intergenic	Antisense
NC_016855.1_32919	32919	-	gene	32921	33958	+	STM14_5565	2	Intergenic	Antisense
NC_016855.1_34142	34142	-	gene	34147	35172	-	STM14_5566	5	Intergenic	Sense
NC_016855.1_34214	34214	-	gene	34147	35172	-	STM14_5566	0	Intragenic	Sense
NC_016855.1_34514	34514	-	gene	34147	35172	-	STM14_5566	0	Intragenic	Sense
NC_016855.1_34687	34687	-	gene	34147	35172	-	STM14_5566	0	Intragenic	Sense
NC_016855.1_34692	34692	-	gene	34147	35172	-	STM14_5566	0	Intragenic	Sense
NC_016855.1_35204	35204	+	gene	35105	36769	-	STM14_5567	0	Intragenic	Antisense
NC_016855.1_35990	35990	-	gene	35105	36769	-	STM14_5567	0	Intragenic	Sense
NC_016855.1_37128	37128	-	gene	36753	37313	-	STM14_5568	0	Intragenic	Sense
NC_016855.1_37321	37321	+	gene	36753	37313	-	STM14_5568	-8	Intergenic	Antisense
NC_016855.1_37345	37345	-	gene	36753	37313	-	STM14_5568	-32	Intergenic	Sense
NC_016855.1_37502	37502	+	gene	37520	38260	-	STM14_5569	18	Intergenic	Antisense
NC_016855.1_37530	37530	+	gene	37520	38260	-	STM14_5569	0	Intragenic	Antisense
NC_016855.1_37771	37771	-	gene	37520	38260	-	STM14_5569	0	Intragenic	Sense
NC_016855.1_37780	37780	-	gene	37520	38260	-	STM14_5569	0	Intragenic	Sense
NC_016855.1_37864	37864	-	gene	37520	38260	-	STM14_5569	0	Intragenic	Sense
NC_016855.1_38081	38081	+	gene	37520	38260	-	STM14_5569	0	Intragenic	Antisense
NC_016855.1_38211	38211	-	gene	37520	38260	-	STM14_5569	0	Intragenic	Sense
NC_016855.1_38293	38293	-	gene	37520	38260	-	STM14_5569	-33	Intergenic	Sense
NC_016855.1_38311	38311	+	gene	37520	38260	-	STM14_5569	-51	Intergenic	Antisense
NC_016855.1_38343	38343	-	gene	37520	38260	-	STM14_5569	-83	Intergenic	Sense
NC_016855.1_38367	38367	+	gene	37520	38260	-	STM14_5569	-107	Intergenic	Antisense
NC_016855.1_38508	38508	+	gene	37520	38260	-	STM14_5569	-248	Intergenic	Antisense
NC_016855.1_38698	38698	+	gene	38915	39403	-	STM14_5570	217	Intergenic	Antisense
NC_016855.1_39160	39160	-	gene	38915	39403	-	STM14_5570	0	Intragenic	Sense
NC_016855.1_39428	39428	-	gene	38915	39403	-	STM14_5570	-25	Intergenic	Sense
NC_016855.1_39636	39636	+	gene	39662	40777	+	STM14_5571	26	Intergenic	Sense
NC_016855.1_41470	41470	+	gene	41463	41798	+	STM14_RS00255	0	Intragenic	Sense
NC_016855.1_41472	41472	+	gene	41463	41798	+	STM14_RS00255	0	Intragenic	Sense
NC_016855.1_41704	41704	+	gene	41463	41798	+	STM14_RS00255	0	Intragenic	Sense
NC_016855.1_41801	41801	-	gene	41463	41798	+	STM14_RS00255	-3	Intergenic	Antisense
NC_016855.1_41890	41890	+	pseudogene	41855	42456	+	STM14_RS00260	0	Intragenic	Sense
NC_016855.1_42741	42741	-	gene	42453	43394	-	STM14_5574	0	Intragenic	Sense
NC_016855.1_43417	43417	-	gene	42453	43394	-	STM14_5574	-23	Intergenic	Sense
NC_016855.1_43787	43787	+	gene	43809	45014	+	STM14_5575	22	Intergenic	Sense
NC_016855.1_43870	43870	-	gene	43809	45014	+	STM14_5575	0	Intragenic	Antisense
NC_016855.1_44022	44022	+	gene	43809	45014	+	STM14_5575	0	Intragenic	Sense
NC_016855.1_44026	44026	+	gene	43809	45014	+	STM14_5575	0	Intragenic	Sense
NC_016855.1_44185	44185	-	gene	43809	45014	+	STM14_5575	0	Intragenic	Antisense
NC_016855.1_44499	44499	+	gene	43809	45014	+	STM14_5575	0	Intragenic	Sense
NC_016855.1_44831	44831	+	gene	43809	45014	+	STM14_5575	0	Intragenic	Sense
NC_016855.1_45009	45009	+	gene	43809	45014	+	STM14_5575	0	Intragenic	Sense
NC_016855.1_45684	45684	+	gene	45011	45988	+	STM14_5576	0	Intragenic	Sense
NC_016855.1_45775	45775	+	gene	45011	45988	+	STM14_5576	0	Intragenic	Sense
NC_016855.1_45905	45905	+	gene	45011	45988	+	STM14_5576	0	Intragenic	Sense
NC_016855.1_47795	47795	-	gene	47344	47766	-	STM14_5578	-29	Intergenic	Sense
NC_016855.1_51698	51698	+	gene	50920	51684	+	STM14_5583	-14	Intergenic	Sense
NC_016855.1_52715	52715	-	gene	52681	53115	+	STM14_RS00330	0	Intragenic	Antisense
NC_016855.1_52765	52765	+	gene	52681	53115	+	STM14_RS00330	0	Intragenic	Sense
NC_016855.1_53325	53325	+	gene	53351	53674	+	STM14_5586	26	Intergenic	Sense
NC_016855.1_55263	55263	-	gene	55259	57256	+	STM14_5589	0	Intragenic	Antisense
NC_016855.1_55266	55266	-	gene	55259	57256	+	STM14_5589	0	Intragenic	Antisense
NC_016855.1_55468	55468	-	gene	55259	57256	+	STM14_5589	0	Intragenic	Antisense
NC_016855.1_57345	57345	+	gene	57296	57730	+	STM14_5590	0	Intragenic	Sense
NC_016855.1_58591	58591	+	gene	57727	58464	+	STM14_5591	-127	Intergenic	Sense
NC_016855.1_58949	58949	-	gene	58974	59243	+	STM14_RS00370	25	Intergenic	Antisense
NC_016855.1_58966	58966	+	gene	58974	59243	+	STM14_RS00370	8	Intergenic	Sense
NC_016855.1_59437	59437	+	gene	59290	59580	+	STM14_RS00375	0	Intragenic	Sense
NC_016855.1_59659	59659	+	gene	59290	59580	+	STM14_RS00375	-79	Intergenic	Sense
NC_016855.1_60471	60471	-	gene	60103	60573	-	STM14_5592	0	Intragenic	Sense
NC_016855.1_60472	60472	-	gene	60103	60573	-	STM14_5592	0	Intragenic	Sense
NC_016855.1_60598	60598	-	gene	60103	60573	-	STM14_5592	-25	Intergenic	Sense
NC_016855.1_60757	60757	+	pseudogene	60790	60995	+	STM14_RS24320	33	Intergenic	Sense
NC_016855.1_61036	61036	+	gene	60988	61368	+	STM14_5593	0	Intragenic	Sense
NC_016855.1_61546	61546	-	gene	61561	62247	+	STM14_5595	15	Intergenic	Antisense
NC_016855.1_61566	61566	-	gene	61561	62247	+	STM14_5595	0	Intragenic	Antisense
NC_016855.1_61617	61617	-	gene	61561	62247	+	STM14_5595	0	Intragenic	Antisense
NC_016855.1_62314	62314	+	gene	62248	62568	+	STM14_5596	0	Intragenic	Sense
NC_016855.1_62569	62569	-	gene	62248	62568	+	STM14_5596	-1	Intergenic	Antisense
NC_016855.1_62570	62570	-	gene	62248	62568	+	STM14_5596	-2	Intergenic	Antisense
NC_016855.1_63517	63517	-	gene	63320	63886	+	STM14_5599	0	Intragenic	Antisense
NC_016855.1_63605	63605	-	gene	63320	63886	+	STM14_5599	0	Intragenic	Antisense
NC_016855.1_65732	65732	-	gene	64613	66034	+	STM14_5601	0	Intragenic	Antisense
NC_016855.1_66519	66519	+	gene	66024	66620	+	STM14_5602	0	Intragenic	Sense
NC_016855.1_69181	69181	-	gene	68567	71215	+	STM14_5607	0	Intragenic	Antisense
NC_016855.1_69431	69431	+	gene	68567	71215	+	STM14_5607	0	Intragenic	Sense
NC_016855.1_75314	75314	+	gene	74597	76423	+	STM14_5613	0	Intragenic	Sense
NC_016855.1_77406	77406	-	gene	76661	77410	+	STM14_5615	0	Intragenic	Antisense
NC_016855.1_77518	77518	-	gene	77624	77917	+	STM14_5616	106	Intergenic	Antisense
NC_016855.1_78470	78470	-	gene	78442	79824	+	STM14_5618	0	Intragenic	Antisense
NC_016855.1_79534	79534	-	gene	78442	79824	+	STM14_5618	0	Intragenic	Antisense
NC_016855.1_79822	79822	-	gene	78442	79824	+	STM14_5618	0	Intragenic	Antisense
NC_016855.1_79822	79822	-	gene	79821	82643	+	STM14_5619	0	Intragenic	Antisense
NC_016855.1_80270	80270	-	gene	79821	82643	+	STM14_5619	0	Intragenic	Antisense
NC_016855.1_80635	80635	-	gene	79821	82643	+	STM14_5619	0	Intragenic	Antisense
NC_016855.1_80652	80652	+	gene	79821	82643	+	STM14_5619	0	Intragenic	Sense
NC_016855.1_81633	81633	+	gene	79821	82643	+	STM14_5619	0	Intragenic	Sense
NC_016855.1_82424	82424	-	gene	79821	82643	+	STM14_5619	0	Intragenic	Antisense
NC_016855.1_82434	82434	+	gene	79821	82643	+	STM14_5619	0	Intragenic	Sense
NC_016855.1_82451	82451	+	gene	79821	82643	+	STM14_5619	0	Intragenic	Sense
NC_016855.1_82552	82552	+	gene	79821	82643	+	STM14_5619	0	Intragenic	Sense
NC_016855.1_82713	82713	+	gene	82659	83153	+	STM14_5620	0	Intragenic	Sense
NC_016855.1_82880	82880	+	gene	82659	83153	+	STM14_5620	0	Intragenic	Sense
NC_016855.1_82915	82915	+	gene	82659	83153	+	STM14_5620	0	Intragenic	Sense
NC_016855.1_82970	82970	+	gene	82659	83153	+	STM14_5620	0	Intragenic	Sense
NC_016855.1_82991	82991	+	gene	82659	83153	+	STM14_5620	0	Intragenic	Sense
NC_016855.1_82995	82995	+	gene	82659	83153	+	STM14_5620	0	Intragenic	Sense
NC_016855.1_83016	83016	+	gene	82659	83153	+	STM14_5620	0	Intragenic	Sense
NC_016855.1_83200	83200	+	gene	83189	83920	+	STM14_5621	0	Intragenic	Sense
NC_016855.1_83441	83441	+	gene	83189	83920	+	STM14_5621	0	Intragenic	Sense
NC_016855.1_83468	83468	+	gene	83189	83920	+	STM14_5621	0	Intragenic	Sense
NC_016855.1_83690	83690	+	gene	83189	83920	+	STM14_5621	0	Intragenic	Sense
NC_016855.1_83836	83836	-	gene	83189	83920	+	STM14_5621	0	Intragenic	Antisense
NC_016855.1_83848	83848	-	gene	83189	83920	+	STM14_5621	0	Intragenic	Antisense
NC_016855.1_84371	84371	-	gene	84297	86459	+	STM14_5622	0	Intragenic	Antisense
NC_016855.1_84449	84449	+	gene	84297	86459	+	STM14_5622	0	Intragenic	Sense
NC_016855.1_84888	84888	+	gene	84297	86459	+	STM14_5622	0	Intragenic	Sense
NC_016855.1_84940	84940	-	gene	84297	86459	+	STM14_5622	0	Intragenic	Antisense
NC_016855.1_84960	84960	-	gene	84297	86459	+	STM14_5622	0	Intragenic	Antisense
NC_016855.1_85191	85191	-	gene	84297	86459	+	STM14_5622	0	Intragenic	Antisense
NC_016855.1_86663	86663	+	gene	86468	86866	-	STM14_5624	0	Intragenic	Antisense
NC_016855.1_87011	87011	-	gene	86866	87096	-	STM14_5625	0	Intragenic	Sense
NC_016855.1_87125	87125	-	gene	86866	87096	-	STM14_5625	-29	Intergenic	Sense
NC_016855.1_87601	87601	-	gene	87175	92433	+	STM14_5626	0	Intragenic	Antisense
NC_016855.1_87754	87754	+	gene	87175	92433	+	STM14_5626	0	Intragenic	Sense
NC_016855.1_88359	88359	-	gene	87175	92433	+	STM14_5626	0	Intragenic	Antisense
NC_016855.1_88676	88676	+	gene	87175	92433	+	STM14_5626	0	Intragenic	Sense
NC_016855.1_90008	90008	+	gene	87175	92433	+	STM14_5626	0	Intragenic	Sense
NC_016855.1_90089	90089	-	gene	87175	92433	+	STM14_5626	0	Intragenic	Antisense
NC_016855.1_90099	90099	-	gene	87175	92433	+	STM14_5626	0	Intragenic	Antisense
NC_016855.1_91046	91046	+	gene	87175	92433	+	STM14_5626	0	Intragenic	Sense
NC_016855.1_91931	91931	+	gene	87175	92433	+	STM14_5626	0	Intragenic	Sense
NC_016855.1_92183	92183	+	gene	87175	92433	+	STM14_5626	0	Intragenic	Sense
NC_016855.1_92792	92792	+	gene	92453	93193	+	STM14_5627	0	Intragenic	Sense
NC_016855.1_92982	92982	+	gene	92453	93193	+	STM14_5627	0	Intragenic	Sense
NC_016855.1_93216	93216	+	gene	92453	93193	+	STM14_5627	-23	Intergenic	Sense
NC_016856.1_116	116	+	gene	190	255	+	STM14_0001	74	Intergenic	Sense
NC_016856.1_139	139	+	gene	190	255	+	STM14_0001	51	Intergenic	Sense
NC_016856.1_148	148	+	gene	190	255	+	STM14_0001	42	Intergenic	Sense
NC_016856.1_1393	1393	-	gene	337	2799	+	STM14_0002	0	Intragenic	Antisense
NC_016856.1_1618	1618	+	gene	337	2799	+	STM14_0002	0	Intragenic	Sense
NC_016856.1_1988	1988	-	gene	337	2799	+	STM14_0002	0	Intragenic	Antisense
NC_016856.1_2283	2283	+	gene	337	2799	+	STM14_0002	0	Intragenic	Sense
NC_016856.1_2369	2369	+	gene	337	2799	+	STM14_0002	0	Intragenic	Sense
NC_016856.1_4225	4225	+	gene	3734	5020	+	STM14_0004	0	Intragenic	Sense
NC_016856.1_4412	4412	+	gene	3734	5020	+	STM14_0004	0	Intragenic	Sense
NC_016856.1_4421	4421	+	gene	3734	5020	+	STM14_0004	0	Intragenic	Sense
NC_016856.1_5353	5353	-	gene	5114	5887	-	STM14_0005	0	Intragenic	Sense
NC_016856.1_5910	5910	-	gene	5114	5887	-	STM14_0005	-23	Intergenic	Sense
NC_016856.1_6299	6299	+	gene	5966	7396	-	STM14_0006	0	Intragenic	Antisense
NC_016856.1_7444	7444	+	gene	5966	7396	-	STM14_0006	-48	Intergenic	Antisense
NC_016856.1_7483	7483	-	gene	5966	7396	-	STM14_0006	-87	Intergenic	Sense
NC_016856.1_7607	7607	-	gene	7665	8618	+	STM14_0007	58	Intergenic	Antisense
NC_016856.1_7619	7619	+	gene	7665	8618	+	STM14_0007	46	Intergenic	Sense
NC_016856.1_8032	8032	+	gene	7665	8618	+	STM14_0007	0	Intragenic	Sense
NC_016856.1_8350	8350	+	gene	7665	8618	+	STM14_0007	0	Intragenic	Sense
NC_016856.1_8678	8678	-	gene	8729	9319	+	STM14_0008	51	Intergenic	Antisense
NC_016856.1_8703	8703	+	gene	8729	9319	+	STM14_0008	26	Intergenic	Sense
NC_016856.1_9820	9820	-	gene	9376	9942	-	STM14_0009	0	Intragenic	Sense
NC_016856.1_9823	9823	-	gene	9376	9942	-	STM14_0009	0	Intragenic	Sense
NC_016856.1_9950	9950	-	gene	9376	9942	-	STM14_0009	-8	Intergenic	Sense
NC_016856.1_9971	9971	+	gene	9376	9942	-	STM14_0009	-29	Intergenic	Antisense
NC_016856.1_10027	10027	+	gene	10092	10805	-	STM14_0010	65	Intergenic	Antisense
NC_016856.1_10031	10031	+	gene	10092	10805	-	STM14_0010	61	Intergenic	Antisense
NC_016856.1_10298	10298	+	gene	10092	10805	-	STM14_0010	0	Intragenic	Antisense
NC_016856.1_10762	10762	-	gene	10092	10805	-	STM14_0010	0	Intragenic	Sense
NC_016856.1_10766	10766	+	gene	10092	10805	-	STM14_0010	0	Intragenic	Antisense
NC_016856.1_11038	11038	+	gene	10841	11245	-	STM14_0011	0	Intragenic	Antisense
NC_016856.1_11277	11277	-	gene	10841	11245	-	STM14_0011	-32	Intergenic	Sense
NC_016856.1_11479	11479	+	gene	11593	13509	+	STM14_0013	114	Intergenic	Sense
NC_016856.1_11553	11553	+	gene	11593	13509	+	STM14_0013	40	Intergenic	Sense
NC_016856.1_11572	11572	+	gene	11593	13509	+	STM14_0013	21	Intergenic	Sense
NC_016856.1_11611	11611	+	gene	11593	13509	+	STM14_0013	0	Intragenic	Sense
NC_016856.1_11719	11719	+	gene	11593	13509	+	STM14_0013	0	Intragenic	Sense
NC_016856.1_12438	12438	-	gene	11593	13509	+	STM14_0013	0	Intragenic	Antisense
NC_016856.1_12482	12482	+	gene	11593	13509	+	STM14_0013	0	Intragenic	Sense
NC_016856.1_12512	12512	+	gene	11593	13509	+	STM14_0013	0	Intragenic	Sense
NC_016856.1_12532	12532	+	gene	11593	13509	+	STM14_0013	0	Intragenic	Sense
NC_016856.1_12744	12744	+	gene	11593	13509	+	STM14_0013	0	Intragenic	Sense
NC_016856.1_13612	13612	-	gene	13595	14734	+	STM14_0014	0	Intragenic	Antisense
NC_016856.1_14185	14185	+	gene	13595	14734	+	STM14_0014	0	Intragenic	Sense
NC_016856.1_14637	14637	+	gene	13595	14734	+	STM14_0014	0	Intragenic	Sense
NC_016856.1_14690	14690	+	gene	13595	14734	+	STM14_0014	0	Intragenic	Sense
NC_016856.1_16493	16493	-	gene	16493	17026	-	STM14_0018	0	Intragenic	Sense
NC_016856.1_17025	17025	+	gene	16493	17026	-	STM14_0018	0	Intragenic	Antisense
NC_016856.1_17964	17964	+	gene	17867	19966	+	STM14_0022	0	Intragenic	Sense
NC_016856.1_18503	18503	+	gene	17867	19966	+	STM14_0022	0	Intragenic	Sense
NC_016856.1_18725	18725	+	gene	17867	19966	+	STM14_0022	0	Intragenic	Sense
NC_016856.1_19352	19352	+	gene	17867	19966	+	STM14_0022	0	Intragenic	Sense
NC_016856.1_21630	21630	+	gene	20058	23054	+	STM14_0023	0	Intragenic	Sense
NC_016856.1_21861	21861	+	gene	20058	23054	+	STM14_0023	0	Intragenic	Sense
NC_016856.1_22968	22968	+	gene	20058	23054	+	STM14_0023	0	Intragenic	Sense
NC_016856.1_23282	23282	+	gene	23335	24039	+	STM14_0025	53	Intergenic	Sense
NC_016856.1_25324	25324	-	gene	25112	25798	+	STM14_0029	0	Intragenic	Antisense
NC_016856.1_25434	25434	-	gene	25112	25798	+	STM14_0029	0	Intragenic	Antisense
NC_016856.1_26855	26855	-	gene	25803	28424	+	STM14_0030	0	Intragenic	Antisense
NC_016856.1_27254	27254	-	gene	25803	28424	+	STM14_0030	0	Intragenic	Antisense
NC_016856.1_27348	27348	-	gene	25803	28424	+	STM14_0030	0	Intragenic	Antisense
NC_016856.1_27666	27666	+	gene	25803	28424	+	STM14_0030	0	Intragenic	Sense
NC_016856.1_28421	28421	-	gene	25803	28424	+	STM14_0030	0	Intragenic	Antisense
NC_016856.1_28821	28821	+	gene	28425	29432	+	STM14_0031	0	Intragenic	Sense
NC_016856.1_29001	29001	+	gene	28425	29432	+	STM14_0031	0	Intragenic	Sense
NC_016856.1_29448	29448	-	gene	29433	29978	+	STM14_0032	0	Intragenic	Antisense
NC_016856.1_29838	29838	+	gene	29433	29978	+	STM14_0032	0	Intragenic	Sense
NC_016856.1_30339	30339	-	gene	29994	30512	+	STM14_0033	0	Intragenic	Antisense
NC_016856.1_30669	30669	-	gene	30478	31209	+	STM14_0034	0	Intragenic	Antisense
NC_016856.1_30920	30920	+	gene	30478	31209	+	STM14_0034	0	Intragenic	Sense
NC_016856.1_31302	31302	+	gene	31274	32119	+	STM14_0035	0	Intragenic	Sense
NC_016856.1_32214	32214	+	gene	32158	32445	+	STM14_0036	0	Intragenic	Sense
NC_016856.1_32319	32319	+	gene	32158	32445	+	STM14_0036	0	Intragenic	Sense
NC_016856.1_33409	33409	+	gene	33364	34368	+	STM14_0038	0	Intragenic	Sense
NC_016856.1_36214	36214	+	gene	35339	37057	+	STM14_0041	0	Intragenic	Sense
NC_016856.1_36685	36685	+	gene	35339	37057	+	STM14_0041	0	Intragenic	Sense
NC_016856.1_36700	36700	+	gene	35339	37057	+	STM14_0041	0	Intragenic	Sense
NC_016856.1_36728	36728	+	gene	35339	37057	+	STM14_0041	0	Intragenic	Sense
NC_016856.1_36823	36823	-	gene	35339	37057	+	STM14_0041	0	Intragenic	Antisense
NC_016856.1_36847	36847	+	gene	35339	37057	+	STM14_0041	0	Intragenic	Sense
NC_016856.1_38577	38577	+	gene	37103	38674	-	STM14_0042	0	Intragenic	Antisense
NC_016856.1_39426	39426	-	gene	38773	39534	-	STM14_0043	0	Intragenic	Sense
NC_016856.1_40228	40228	-	gene	40131	41624	+	STM14_0044	0	Intragenic	Antisense
NC_016856.1_40501	40501	+	gene	40131	41624	+	STM14_0044	0	Intragenic	Sense
NC_016856.1_40731	40731	+	gene	40131	41624	+	STM14_0044	0	Intragenic	Sense
NC_016856.1_41789	41789	+	gene	41723	42913	+	STM14_0045	0	Intragenic	Sense
NC_016856.1_41857	41857	+	gene	41723	42913	+	STM14_0045	0	Intragenic	Sense
NC_016856.1_42801	42801	-	gene	41723	42913	+	STM14_0045	0	Intragenic	Antisense
NC_016856.1_44166	44166	+	gene	42932	44185	+	STM14_0046	0	Intragenic	Sense
NC_016856.1_44204	44204	+	gene	42932	44185	+	STM14_0046	-19	Intergenic	Sense
NC_016856.1_44233	44233	+	gene	42932	44185	+	STM14_0046	-48	Intergenic	Sense
NC_016856.1_45029	45029	-	gene	44312	46027	+	STM14_0047	0	Intragenic	Antisense
NC_016856.1_45050	45050	-	gene	44312	46027	+	STM14_0047	0	Intragenic	Antisense
NC_016856.1_45888	45888	+	gene	44312	46027	+	STM14_0047	0	Intragenic	Sense
NC_016856.1_45930	45930	-	gene	44312	46027	+	STM14_0047	0	Intragenic	Antisense
NC_016856.1_45977	45977	-	gene	44312	46027	+	STM14_0047	0	Intragenic	Antisense
NC_016856.1_45992	45992	+	gene	44312	46027	+	STM14_0047	0	Intragenic	Sense
NC_016856.1_46043	46043	+	gene	44312	46027	+	STM14_0047	-16	Intergenic	Sense
NC_016856.1_46122	46122	+	gene	46190	47356	+	STM14_0048	68	Intergenic	Sense
NC_016856.1_46156	46156	+	gene	46190	47356	+	STM14_0048	34	Intergenic	Sense
NC_016856.1_47913	47913	+	gene	47418	48317	+	STM14_0049	0	Intragenic	Sense
NC_016856.1_48177	48177	+	gene	47418	48317	+	STM14_0049	0	Intragenic	Sense
NC_016856.1_48188	48188	+	gene	47418	48317	+	STM14_0049	0	Intragenic	Sense
NC_016856.1_48197	48197	+	gene	47418	48317	+	STM14_0049	0	Intragenic	Sense
NC_016856.1_48231	48231	+	gene	47418	48317	+	STM14_0049	0	Intragenic	Sense
NC_016856.1_51034	51034	+	gene	50451	51824	-	STM14_0051	0	Intragenic	Antisense
NC_016856.1_51492	51492	+	gene	50451	51824	-	STM14_0051	0	Intragenic	Antisense
NC_016856.1_52094	52094	+	gene	52280	52543	-	STM14_0052	186	Intergenic	Antisense
NC_016856.1_52114	52114	+	gene	52280	52543	-	STM14_0052	166	Intergenic	Antisense
NC_016856.1_52158	52158	+	gene	52280	52543	-	STM14_0052	122	Intergenic	Antisense
NC_016856.1_52449	52449	+	gene	52280	52543	-	STM14_0052	0	Intragenic	Antisense
NC_016856.1_52472	52472	+	gene	52280	52543	-	STM14_0052	0	Intragenic	Antisense
NC_016856.1_52583	52583	-	gene	52280	52543	-	STM14_0052	-40	Intergenic	Sense
NC_016856.1_52672	52672	-	gene	52649	52864	+	STM14_0053	0	Intragenic	Antisense
NC_016856.1_52849	52849	+	gene	52649	52864	+	STM14_0053	0	Intragenic	Sense
NC_016856.1_53297	53297	+	gene	52872	53810	+	STM14_0054	0	Intragenic	Sense
NC_016856.1_54064	54064	-	gene	53855	56689	+	STM14_0055	0	Intragenic	Antisense
NC_016856.1_54098	54098	+	gene	53855	56689	+	STM14_0055	0	Intragenic	Sense
NC_016856.1_56399	56399	+	gene	53855	56689	+	STM14_0055	0	Intragenic	Sense
NC_016856.1_56528	56528	+	gene	53855	56689	+	STM14_0055	0	Intragenic	Sense
NC_016856.1_56730	56730	+	gene	56689	57189	+	STM14_0056	0	Intragenic	Sense
NC_016856.1_57358	57358	+	gene	57344	57793	+	STM14_0058	0	Intragenic	Sense
NC_016856.1_58841	58841	+	gene	57796	58746	+	STM14_0059	-95	Intergenic	Sense
NC_016856.1_58962	58962	+	gene	58946	60148	+	STM14_0060	0	Intragenic	Sense
NC_016856.1_59439	59439	+	gene	58946	60148	+	STM14_0060	0	Intragenic	Sense
NC_016856.1_59458	59458	+	gene	58946	60148	+	STM14_0060	0	Intragenic	Sense
NC_016856.1_59539	59539	-	gene	58946	60148	+	STM14_0060	0	Intragenic	Antisense
NC_016856.1_60821	60821	-	gene	60164	61084	+	STM14_0061	0	Intragenic	Antisense
NC_016856.1_61783	61783	-	gene	61106	61792	-	STM14_0062	0	Intragenic	Sense
NC_016856.1_61807	61807	+	gene	61794	63413	-	STM14_0063	0	Intragenic	Antisense
NC_016856.1_61820	61820	+	gene	61794	63413	-	STM14_0063	0	Intragenic	Antisense
NC_016856.1_61839	61839	+	gene	61794	63413	-	STM14_0063	0	Intragenic	Antisense
NC_016856.1_61872	61872	+	gene	61794	63413	-	STM14_0063	0	Intragenic	Antisense
NC_016856.1_61965	61965	+	gene	61794	63413	-	STM14_0063	0	Intragenic	Antisense
NC_016856.1_62120	62120	-	gene	61794	63413	-	STM14_0063	0	Intragenic	Sense
NC_016856.1_62202	62202	-	gene	61794	63413	-	STM14_0063	0	Intragenic	Sense
NC_016856.1_62220	62220	+	gene	61794	63413	-	STM14_0063	0	Intragenic	Antisense
NC_016856.1_62908	62908	-	gene	61794	63413	-	STM14_0063	0	Intragenic	Sense
NC_016856.1_63116	63116	-	gene	61794	63413	-	STM14_0063	0	Intragenic	Sense
NC_016856.1_66918	66918	+	gene	66654	66893	-	STM14_0066	-25	Intergenic	Antisense
NC_016856.1_67706	67706	+	gene	67052	68392	-	STM14_0067	0	Intragenic	Antisense
NC_016856.1_73931	73931	+	gene	74017	74838	+	STM14_0075	86	Intergenic	Sense
NC_016856.1_73985	73985	+	gene	74017	74838	+	STM14_0075	32	Intergenic	Sense
NC_016856.1_74808	74808	+	gene	74017	74838	+	STM14_0075	0	Intragenic	Sense
NC_016856.1_74844	74844	+	gene	74017	74838	+	STM14_0075	-6	Intergenic	Sense
NC_016856.1_75012	75012	-	pseudogene	75088	75436	+	STM14_RS25810	76	Intergenic	Antisense
NC_016856.1_75781	75781	+	gene	75881	77029	+	STM14_0077	100	Intergenic	Sense
NC_016856.1_75851	75851	+	gene	75881	77029	+	STM14_0077	30	Intergenic	Sense
NC_016856.1_80096	80096	+	gene	77048	80275	+	STM14_0078	0	Intragenic	Sense
NC_016856.1_80166	80166	+	gene	77048	80275	+	STM14_0078	0	Intragenic	Sense
NC_016856.1_80287	80287	+	gene	77048	80275	+	STM14_0078	-12	Intergenic	Sense
NC_016856.1_80532	80532	-	gene	80354	80542	+	STM14_0079	0	Intragenic	Antisense
NC_016856.1_80532	80532	-	gene	80499	80957	+	STM14_0080	0	Intragenic	Antisense
NC_016856.1_80797	80797	+	gene	80499	80957	+	STM14_0080	0	Intragenic	Sense
NC_016856.1_80838	80838	+	gene	80499	80957	+	STM14_0080	0	Intragenic	Sense
NC_016856.1_80849	80849	+	gene	80499	80957	+	STM14_0080	0	Intragenic	Sense
NC_016856.1_81136	81136	-	pseudogene	80994	81178	-	STM14_RS24335	0	Intragenic	Sense
NC_016856.1_81177	81177	+	pseudogene	80994	81178	-	STM14_RS24335	0	Intragenic	Antisense
NC_016856.1_81184	81184	-	pseudogene	80994	81178	-	STM14_RS24335	-6	Intergenic	Sense
NC_016856.1_81241	81241	+	gene	81260	81655	+	STM14_0081	19	Intergenic	Sense
NC_016856.1_81278	81278	+	gene	81260	81655	+	STM14_0081	0	Intragenic	Sense
NC_016856.1_81518	81518	-	gene	81260	81655	+	STM14_0081	0	Intragenic	Antisense
NC_016856.1_83692	83692	+	gene	83276	84829	-	STM14_0084	0	Intragenic	Antisense
NC_016856.1_84700	84700	-	gene	83276	84829	-	STM14_0084	0	Intragenic	Sense
NC_016856.1_84820	84820	-	gene	83276	84829	-	STM14_0084	0	Intragenic	Sense
NC_016856.1_86916	86916	-	gene	86221	87363	-	STM14_0087	0	Intragenic	Sense
NC_016856.1_91632	91632	+	gene	91173	92459	+	STM14_0092	0	Intragenic	Sense
NC_016856.1_93124	93124	+	gene	92890	94230	+	STM14_0094	0	Intragenic	Sense
NC_016856.1_93271	93271	+	gene	92890	94230	+	STM14_0094	0	Intragenic	Sense
NC_016856.1_94279	94279	-	gene	94319	94549	+	STM14_0095	40	Intergenic	Antisense
NC_016856.1_94517	94517	-	gene	94319	94549	+	STM14_0095	0	Intragenic	Antisense
NC_016856.1_94519	94519	-	gene	94319	94549	+	STM14_0095	0	Intragenic	Antisense
NC_016856.1_94811	94811	+	gene	94843	95259	+	STM14_0096	32	Intergenic	Sense
NC_016856.1_94821	94821	+	gene	94843	95259	+	STM14_0096	22	Intergenic	Sense
NC_016856.1_94834	94834	+	gene	94843	95259	+	STM14_0096	9	Intergenic	Sense
NC_016856.1_95022	95022	+	gene	94843	95259	+	STM14_0096	0	Intragenic	Sense
NC_016856.1_95069	95069	+	gene	94843	95259	+	STM14_0096	0	Intragenic	Sense
NC_016856.1_95548	95548	-	gene	95483	95773	-	STM14_0098	0	Intragenic	Sense
NC_016856.1_96091	96091	-	gene	95983	96177	+	STM14_0099	0	Intragenic	Antisense
NC_016856.1_96674	96674	+	gene	96671	98560	+	STM14_0100	0	Intragenic	Sense
NC_016856.1_97149	97149	+	gene	96671	98560	+	STM14_0100	0	Intragenic	Sense
NC_016856.1_98461	98461	+	gene	96671	98560	+	STM14_0100	0	Intragenic	Sense
NC_016856.1_98592	98592	+	gene	96671	98560	+	STM14_0100	-32	Intergenic	Sense
NC_016856.1_98668	98668	+	pseudogene	98765	98845	-	STM14_RS25820	97	Intergenic	Antisense
NC_016856.1_98892	98892	-	pseudogene	98765	98845	-	STM14_RS25820	-47	Intergenic	Sense
NC_016856.1_98941	98941	+	gene	98967	99497	+	STM14_0103	26	Intergenic	Sense
NC_016856.1_99184	99184	-	gene	98967	99497	+	STM14_0103	0	Intragenic	Antisense
NC_016856.1_101356	101356	+	gene	99490	101352	+	STM14_0104	-4	Intergenic	Sense
NC_016856.1_101490	101490	-	gene	101551	102030	+	STM14_0106	61	Intergenic	Antisense
NC_016856.1_101524	101524	+	gene	101551	102030	+	STM14_0106	27	Intergenic	Sense
NC_016856.1_101554	101554	+	gene	101551	102030	+	STM14_0106	0	Intragenic	Sense
NC_016856.1_101998	101998	+	gene	101551	102030	+	STM14_0106	0	Intragenic	Sense
NC_016856.1_102192	102192	-	gene	102136	102984	-	STM14_0107	0	Intragenic	Sense
NC_016856.1_102985	102985	-	gene	102136	102984	-	STM14_0107	-1	Intergenic	Sense
NC_016856.1_103000	103000	+	gene	102995	103372	-	STM14_0108	0	Intragenic	Antisense
NC_016856.1_103388	103388	+	gene	103375	104196	-	STM14_0109	0	Intragenic	Antisense
NC_016856.1_103764	103764	-	gene	103375	104196	-	STM14_0109	0	Intragenic	Sense
NC_016856.1_103800	103800	-	gene	103375	104196	-	STM14_0109	0	Intragenic	Sense
NC_016856.1_103839	103839	-	gene	103375	104196	-	STM14_0109	0	Intragenic	Sense
NC_016856.1_104125	104125	+	gene	103375	104196	-	STM14_0109	0	Intragenic	Antisense
NC_016856.1_104353	104353	-	gene	104193	105182	-	STM14_0110	0	Intragenic	Sense
NC_016856.1_104401	104401	+	gene	104193	105182	-	STM14_0110	0	Intragenic	Antisense
NC_016856.1_105265	105265	-	gene	105182	106468	-	STM14_0111	0	Intragenic	Sense
NC_016856.1_106242	106242	+	gene	105182	106468	-	STM14_0111	0	Intragenic	Antisense
NC_016856.1_106515	106515	+	gene	106522	108882	-	STM14_0112	7	Intergenic	Antisense
NC_016856.1_107125	107125	-	gene	106522	108882	-	STM14_0112	0	Intragenic	Sense
NC_016856.1_107684	107684	-	gene	106522	108882	-	STM14_0112	0	Intragenic	Sense
NC_016856.1_108536	108536	-	gene	106522	108882	-	STM14_0112	0	Intragenic	Sense
NC_016856.1_108559	108559	+	gene	106522	108882	-	STM14_0112	0	Intragenic	Antisense
NC_016856.1_108929	108929	-	gene	106522	108882	-	STM14_0112	-47	Intergenic	Sense
NC_016856.1_109013	109013	-	gene	109136	109948	+	STM14_0114	123	Intergenic	Antisense
NC_016856.1_109025	109025	-	gene	109136	109948	+	STM14_0114	111	Intergenic	Antisense
NC_016856.1_109031	109031	+	gene	109136	109948	+	STM14_0114	105	Intergenic	Sense
NC_016856.1_110049	110049	+	gene	110043	110702	-	STM14_0115	0	Intragenic	Antisense
NC_016856.1_110090	110090	+	gene	110043	110702	-	STM14_0115	0	Intragenic	Antisense
NC_016856.1_112519	112519	-	gene	110714	113620	-	STM14_0116	0	Intragenic	Sense
NC_016856.1_113150	113150	+	gene	110714	113620	-	STM14_0116	0	Intragenic	Antisense
NC_016856.1_113601	113601	-	gene	110714	113620	-	STM14_0116	0	Intragenic	Sense
NC_016856.1_113814	113814	-	gene	113794	116145	-	STM14_0117	0	Intragenic	Sense
NC_016856.1_116169	116169	-	gene	116189	116809	-	STM14_0118	20	Intergenic	Sense
NC_016856.1_116837	116837	-	pseudogene	116739	117050	-	STM14_RS24340	0	Intragenic	Sense
NC_016856.1_117116	117116	+	gene	117011	117313	+	STM14_RS24345	0	Intragenic	Sense
NC_016856.1_117337	117337	+	gene	117011	117313	+	STM14_RS24345	-24	Intergenic	Sense
NC_016856.1_117843	117843	+	gene	117528	117947	+	STM14_0119	0	Intragenic	Sense
NC_016856.1_118498	118498	-	gene	117953	118648	-	STM14_0120	0	Intragenic	Sense
NC_016856.1_119332	119332	-	gene	118789	120291	-	STM14_0121	0	Intragenic	Sense
NC_016856.1_120280	120280	+	gene	118789	120291	-	STM14_0121	0	Intragenic	Antisense
NC_016856.1_120690	120690	+	gene	120302	122011	-	STM14_0122	0	Intragenic	Antisense
NC_016856.1_122040	122040	-	gene	120302	122011	-	STM14_0122	-29	Intergenic	Sense
NC_016856.1_122175	122175	+	gene	120302	122011	-	STM14_0122	-164	Intergenic	Antisense
NC_016856.1_122184	122184	+	gene	122352	123197	+	STM14_0123	168	Intergenic	Sense
NC_016856.1_123236	123236	+	gene	122352	123197	+	STM14_0123	-39	Intergenic	Sense
NC_016856.1_127511	127511	-	riboswitch	127414	127513	-	ID=id1;Dbxref=RFAM:RF00059;Note=TPP	riboswitch;bound_moiety=thiamine	Intergenic	Sense
NC_016856.1_127604	127604	+	gene	127560	129218	-	STM14_0129	0	Intragenic	Antisense
NC_016856.1_128134	128134	+	gene	127560	129218	-	STM14_0129	0	Intragenic	Antisense
NC_016856.1_129200	129200	+	gene	127560	129218	-	STM14_0129	0	Intragenic	Antisense
NC_016856.1_129286	129286	+	gene	129311	129433	+	STM14_RS01125	25	Intergenic	Sense
NC_016856.1_129403	129403	+	gene	129311	129433	+	STM14_RS01125	0	Intragenic	Sense
NC_016856.1_129451	129451	+	gene	129311	129433	+	STM14_RS01125	-18	Intergenic	Sense
NC_016856.1_129453	129453	+	gene	129311	129433	+	STM14_RS01125	-20	Intergenic	Sense
NC_016856.1_129514	129514	+	gene	129311	129433	+	STM14_RS01125	-81	Intergenic	Sense
NC_016856.1_131828	131828	+	gene	131788	132879	-	STM14_0133	0	Intragenic	Antisense
NC_016856.1_132092	132092	+	gene	131788	132879	-	STM14_0133	0	Intragenic	Antisense
NC_016856.1_134071	134071	-	gene	132879	134450	-	STM14_0134	0	Intragenic	Sense
NC_016856.1_134650	134650	-	gene	134538	134624	-	STM14_0135	-26	Intergenic	Sense
NC_016856.1_135071	135071	+	gene	135281	136225	+	STM14_0138	210	Intergenic	Sense
NC_016856.1_135797	135797	-	gene	135281	136225	+	STM14_0138	0	Intragenic	Antisense
NC_016856.1_136155	136155	+	gene	135281	136225	+	STM14_0138	0	Intragenic	Sense
NC_016856.1_136512	136512	+	gene	136520	138271	+	STM14_0139	8	Intergenic	Sense
NC_016856.1_136542	136542	+	gene	136520	138271	+	STM14_0139	0	Intragenic	Sense
NC_016856.1_137905	137905	+	gene	136520	138271	+	STM14_0139	0	Intragenic	Sense
NC_016856.1_138367	138367	+	gene	138274	138765	+	STM14_0140	0	Intragenic	Sense
NC_016856.1_138831	138831	-	gene	138274	138765	+	STM14_0140	-66	Intergenic	Antisense
NC_016856.1_138875	138875	-	gene	138274	138765	+	STM14_0140	-110	Intergenic	Antisense
NC_016856.1_138983	138983	-	gene	139049	140053	+	STM14_0142	66	Intergenic	Antisense
NC_016856.1_138990	138990	+	gene	139049	140053	+	STM14_0142	59	Intergenic	Sense
NC_016856.1_139199	139199	+	gene	139049	140053	+	STM14_0142	0	Intragenic	Sense
NC_016856.1_140388	140388	+	gene	140659	141117	+	STM14_0145	271	Intergenic	Sense
NC_016856.1_140615	140615	+	gene	140659	141117	+	STM14_0145	44	Intergenic	Sense
NC_016856.1_140650	140650	+	gene	140659	141117	+	STM14_0145	9	Intergenic	Sense
NC_016856.1_140651	140651	+	gene	140659	141117	+	STM14_0145	8	Intergenic	Sense
NC_016856.1_141760	141760	+	gene	141119	142060	+	STM14_0146	0	Intragenic	Sense
NC_016856.1_142058	142058	-	gene	141119	142060	+	STM14_0146	0	Intragenic	Antisense
NC_016856.1_142058	142058	-	gene	142057	142422	+	STM14_0147	0	Intragenic	Antisense
NC_016856.1_142398	142398	-	gene	142057	142422	+	STM14_0147	0	Intragenic	Antisense
NC_016856.1_143510	143510	+	gene	142438	144204	+	STM14_0148	0	Intragenic	Sense
NC_016856.1_146951	146951	-	gene	145675	147033	+	STM14_0150	0	Intragenic	Antisense
NC_016856.1_147116	147116	+	gene	147027	148109	+	STM14_0151	0	Intragenic	Sense
NC_016856.1_148153	148153	+	gene	148112	149428	+	STM14_0152	0	Intragenic	Sense
NC_016856.1_148832	148832	+	gene	148112	149428	+	STM14_0152	0	Intragenic	Sense
NC_016856.1_149744	149744	-	gene	149428	150672	+	STM14_0153	0	Intragenic	Antisense
NC_016856.1_149797	149797	+	gene	149428	150672	+	STM14_0153	0	Intragenic	Sense
NC_016856.1_150613	150613	-	gene	149428	150672	+	STM14_0153	0	Intragenic	Antisense
NC_016856.1_153225	153225	-	gene	151855	153330	+	STM14_0155	0	Intragenic	Antisense
NC_016856.1_153538	153538	+	gene	153323	154243	+	STM14_0156	0	Intragenic	Sense
NC_016856.1_153832	153832	+	gene	153323	154243	+	STM14_0156	0	Intragenic	Sense
NC_016856.1_153851	153851	+	gene	153323	154243	+	STM14_0156	0	Intragenic	Sense
NC_016856.1_153862	153862	+	gene	153323	154243	+	STM14_0156	0	Intragenic	Sense
NC_016856.1_153962	153962	+	gene	153323	154243	+	STM14_0156	0	Intragenic	Sense
NC_016856.1_154651	154651	+	gene	154245	155075	+	STM14_0157	0	Intragenic	Sense
NC_016856.1_155354	155354	+	gene	155072	156334	+	STM14_0158	0	Intragenic	Sense
NC_016856.1_155597	155597	+	gene	155072	156334	+	STM14_0158	0	Intragenic	Sense
NC_016856.1_155630	155630	+	gene	155072	156334	+	STM14_0158	0	Intragenic	Sense
NC_016856.1_156335	156335	+	gene	155072	156334	+	STM14_0158	-1	Intergenic	Sense
NC_016856.1_157598	157598	+	gene	157647	158564	+	STM14_0160	49	Intergenic	Sense
NC_016856.1_157620	157620	+	gene	157647	158564	+	STM14_0160	27	Intergenic	Sense
NC_016856.1_157657	157657	+	gene	157647	158564	+	STM14_0160	0	Intragenic	Sense
NC_016856.1_157836	157836	+	gene	157647	158564	+	STM14_0160	0	Intragenic	Sense
NC_016856.1_158030	158030	+	gene	157647	158564	+	STM14_0160	0	Intragenic	Sense
NC_016856.1_158403	158403	+	gene	157647	158564	+	STM14_0160	0	Intragenic	Sense
NC_016856.1_158512	158512	+	gene	157647	158564	+	STM14_0160	0	Intragenic	Sense
NC_016856.1_158586	158586	+	gene	157647	158564	+	STM14_0160	-22	Intergenic	Sense
NC_016856.1_158637	158637	-	gene	157647	158564	+	STM14_0160	-73	Intergenic	Antisense
NC_016856.1_158777	158777	+	gene	158816	159340	+	STM14_0161	39	Intergenic	Sense
NC_016856.1_158790	158790	+	gene	158816	159340	+	STM14_0161	26	Intergenic	Sense
NC_016856.1_158837	158837	+	gene	158816	159340	+	STM14_0161	0	Intragenic	Sense
NC_016856.1_159054	159054	-	gene	158816	159340	+	STM14_0161	0	Intragenic	Antisense
NC_016856.1_161228	161228	+	gene	159402	162107	+	STM14_0162	0	Intragenic	Sense
NC_016856.1_162177	162177	+	gene	159402	162107	+	STM14_0162	-70	Intergenic	Sense
NC_016856.1_162508	162508	+	gene	162259	162654	+	STM14_0163	0	Intragenic	Sense
NC_016856.1_163167	163167	-	gene	162976	163167	-	STM14_0166	0	Intragenic	Sense
NC_016856.1_163215	163215	-	gene	163177	163920	-	STM14_0167	0	Intragenic	Sense
NC_016856.1_164617	164617	+	gene	163920	164540	-	STM14_0168	-77	Intergenic	Antisense
NC_016856.1_164644	164644	-	gene	163920	164540	-	STM14_0168	-104	Intergenic	Sense
NC_016856.1_164697	164697	-	gene	164766	165809	+	STM14_0169	69	Intergenic	Antisense
NC_016856.1_164703	164703	+	gene	164766	165809	+	STM14_0169	63	Intergenic	Sense
NC_016856.1_164716	164716	+	gene	164766	165809	+	STM14_0169	50	Intergenic	Sense
NC_016856.1_165248	165248	+	gene	164766	165809	+	STM14_0169	0	Intragenic	Sense
NC_016856.1_168885	168885	-	gene	168890	169072	-	STM14_0173	5	Intergenic	Sense
NC_016856.1_170013	170013	-	gene	169086	169979	-	STM14_0174	-34	Intergenic	Sense
NC_016856.1_170035	170035	+	gene	170067	170630	+	STM14_0175	32	Intergenic	Sense
NC_016856.1_170036	170036	+	gene	170067	170630	+	STM14_0175	31	Intergenic	Sense
NC_016856.1_170978	170978	+	gene	170627	171481	+	STM14_0176	0	Intragenic	Sense
NC_016856.1_171518	171518	+	gene	170627	171481	+	STM14_0176	-37	Intergenic	Sense
NC_016856.1_171527	171527	+	gene	170627	171481	+	STM14_0176	-46	Intergenic	Sense
NC_016856.1_171527	171527	+	gene	171573	172523	-	STM14_0177	46	Intergenic	Antisense
NC_016856.1_172696	172696	-	gene	172523	173929	-	STM14_0178	0	Intragenic	Sense
NC_016856.1_173072	173072	-	gene	172523	173929	-	STM14_0178	0	Intragenic	Sense
NC_016856.1_173086	173086	-	gene	172523	173929	-	STM14_0178	0	Intragenic	Sense
NC_016856.1_174027	174027	+	gene	174093	175463	-	STM14_0180	66	Intergenic	Antisense
NC_016856.1_175204	175204	-	gene	174093	175463	-	STM14_0180	0	Intragenic	Sense
NC_016856.1_175610	175610	-	gene	174093	175463	-	STM14_0180	-147	Intergenic	Sense
NC_016856.1_175628	175628	+	gene	174093	175463	-	STM14_0180	-165	Intergenic	Antisense
NC_016856.1_175970	175970	+	gene	176029	176793	+	STM14_0182	59	Intergenic	Sense
NC_016856.1_176549	176549	+	gene	176029	176793	+	STM14_0182	0	Intragenic	Sense
NC_016856.1_176795	176795	+	gene	176029	176793	+	STM14_0182	-2	Intergenic	Sense
NC_016856.1_176905	176905	+	gene	176953	179616	+	STM14_0183	48	Intergenic	Sense
NC_016856.1_177306	177306	-	gene	176953	179616	+	STM14_0183	0	Intragenic	Antisense
NC_016856.1_178450	178450	+	gene	176953	179616	+	STM14_0183	0	Intragenic	Sense
NC_016856.1_181247	181247	+	gene	179631	181520	+	STM14_0184	0	Intragenic	Sense
NC_016856.1_181353	181353	+	gene	179631	181520	+	STM14_0184	0	Intragenic	Sense
NC_016856.1_181649	181649	+	gene	181720	183144	+	STM14_0185	71	Intergenic	Sense
NC_016856.1_182056	182056	+	gene	181720	183144	+	STM14_0185	0	Intragenic	Sense
NC_016856.1_182886	182886	+	gene	181720	183144	+	STM14_0185	0	Intragenic	Sense
NC_016856.1_182889	182889	+	gene	181720	183144	+	STM14_0185	0	Intragenic	Sense
NC_016856.1_183956	183956	+	gene	183755	184546	-	STM14_0188	0	Intragenic	Antisense
NC_016856.1_185117	185117	+	pseudogene	184559	186173	-	STM14_0189	0	Intragenic	Antisense
NC_016856.1_185264	185264	+	pseudogene	184559	186173	-	STM14_0189	0	Intragenic	Antisense
NC_016856.1_186202	186202	-	pseudogene	184559	186173	-	STM14_0189	-29	Intergenic	Sense
NC_016856.1_186353	186353	-	pseudogene	184559	186173	-	STM14_0189	-180	Intergenic	Sense
NC_016856.1_186408	186408	-	gene	186562	189159	+	STM14_0190	154	Intergenic	Antisense
NC_016856.1_186427	186427	+	gene	186562	189159	+	STM14_0190	135	Intergenic	Sense
NC_016856.1_186431	186431	+	gene	186562	189159	+	STM14_0190	131	Intergenic	Sense
NC_016856.1_186452	186452	+	gene	186562	189159	+	STM14_0190	110	Intergenic	Sense
NC_016856.1_187414	187414	+	gene	186562	189159	+	STM14_0190	0	Intragenic	Sense
NC_016856.1_187525	187525	+	gene	186562	189159	+	STM14_0190	0	Intragenic	Sense
NC_016856.1_188857	188857	+	gene	186562	189159	+	STM14_0190	0	Intragenic	Sense
NC_016856.1_189095	189095	+	gene	186562	189159	+	STM14_0190	0	Intragenic	Sense
NC_016856.1_190086	190086	+	gene	189220	190062	-	STM14_0191	-24	Intergenic	Antisense
NC_016856.1_190098	190098	+	gene	189220	190062	-	STM14_0191	-36	Intergenic	Antisense
NC_016856.1_190129	190129	+	gene	189220	190062	-	STM14_0191	-67	Intergenic	Antisense
NC_016856.1_190144	190144	+	gene	189220	190062	-	STM14_0191	-82	Intergenic	Antisense
NC_016856.1_190151	190151	+	gene	189220	190062	-	STM14_0191	-89	Intergenic	Antisense
NC_016856.1_190152	190152	+	gene	189220	190062	-	STM14_0191	-90	Intergenic	Antisense
NC_016856.1_190262	190262	+	gene	190308	190670	+	STM14_0192	46	Intergenic	Sense
NC_016856.1_190277	190277	+	gene	190308	190670	+	STM14_0192	31	Intergenic	Sense
NC_016856.1_193109	193109	+	gene	191855	193126	+	STM14_0194	0	Intragenic	Sense
NC_016856.1_194069	194069	+	gene	193116	194099	+	STM14_0195	0	Intragenic	Sense
NC_016856.1_194109	194109	+	gene	194109	194876	+	STM14_0196	0	Intragenic	Sense
NC_016856.1_194119	194119	+	gene	194109	194876	+	STM14_0196	0	Intragenic	Sense
NC_016856.1_195105	195105	+	gene	194906	195700	-	STM14_0197	0	Intragenic	Antisense
NC_016856.1_195140	195140	+	gene	194906	195700	-	STM14_0197	0	Intragenic	Antisense
NC_016856.1_195158	195158	+	gene	194906	195700	-	STM14_0197	0	Intragenic	Antisense
NC_016856.1_195716	195716	-	gene	195721	196581	-	STM14_0198	5	Intergenic	Sense
NC_016856.1_195901	195901	+	gene	195721	196581	-	STM14_0198	0	Intragenic	Antisense
NC_016856.1_195939	195939	-	gene	195721	196581	-	STM14_0198	0	Intragenic	Sense
NC_016856.1_196494	196494	-	gene	195721	196581	-	STM14_0198	0	Intragenic	Sense
NC_016856.1_196589	196589	-	gene	195721	196581	-	STM14_0198	-8	Intergenic	Sense
NC_016856.1_196636	196636	+	gene	196688	197035	-	STM14_0199	52	Intergenic	Antisense
NC_016856.1_197031	197031	-	gene	196688	197035	-	STM14_0199	0	Intragenic	Sense
NC_016856.1_197058	197058	-	gene	196688	197035	-	STM14_0199	-23	Intergenic	Sense
NC_016856.1_197149	197149	+	gene	197237	198847	+	STM14_0200	88	Intergenic	Sense
NC_016856.1_199819	199819	-	gene	198925	201315	-	STM14_0201	0	Intragenic	Sense
NC_016856.1_201722	201722	-	gene	201521	202057	+	STM14_0202	0	Intragenic	Antisense
NC_016856.1_201740	201740	+	gene	201521	202057	+	STM14_0202	0	Intragenic	Sense
NC_016856.1_202011	202011	+	gene	201521	202057	+	STM14_0202	0	Intragenic	Sense
NC_016856.1_202045	202045	+	gene	201521	202057	+	STM14_0202	0	Intragenic	Sense
NC_016856.1_202399	202399	+	gene	202115	202777	-	STM14_0203	0	Intragenic	Antisense
NC_016856.1_202443	202443	-	gene	202115	202777	-	STM14_0203	0	Intragenic	Sense
NC_016856.1_202750	202750	-	gene	202115	202777	-	STM14_0203	0	Intragenic	Sense
NC_016856.1_202810	202810	-	gene	202115	202777	-	STM14_0203	-33	Intergenic	Sense
NC_016856.1_203500	203500	-	gene	202886	203812	+	STM14_0204	0	Intragenic	Antisense
NC_016856.1_203992	203992	+	gene	203809	204579	+	STM14_0205	0	Intragenic	Sense
NC_016856.1_204090	204090	+	gene	203809	204579	+	STM14_0205	0	Intragenic	Sense
NC_016856.1_204867	204867	+	gene	204696	205775	-	STM14_0206	0	Intragenic	Antisense
NC_016856.1_204982	204982	-	gene	204696	205775	-	STM14_0206	0	Intragenic	Sense
NC_016856.1_209105	209105	+	gene	209088	209627	-	STM14_0209	0	Intragenic	Antisense
NC_016856.1_209362	209362	-	gene	209088	209627	-	STM14_0209	0	Intragenic	Sense
NC_016856.1_209965	209965	+	gene	209997	210437	+	STM14_0211	32	Intergenic	Sense
NC_016856.1_210475	210475	+	gene	210499	211728	+	STM14_0212	24	Intergenic	Sense
NC_016856.1_210509	210509	+	gene	210499	211728	+	STM14_0212	0	Intragenic	Sense
NC_016856.1_210511	210511	+	gene	210499	211728	+	STM14_0212	0	Intragenic	Sense
NC_016856.1_211031	211031	+	gene	210499	211728	+	STM14_0212	0	Intragenic	Sense
NC_016856.1_211675	211675	+	gene	210499	211728	+	STM14_0212	0	Intragenic	Sense
NC_016856.1_212177	212177	-	pseudogene	212053	212234	+	STM14_RS24360	0	Intragenic	Antisense
NC_016856.1_212383	212383	-	gene	212210	213064	-	STM14_0214	0	Intragenic	Sense
NC_016856.1_213018	213018	-	gene	212210	213064	-	STM14_0214	0	Intragenic	Sense
NC_016856.1_215858	215858	+	gene	214578	215996	-	STM14_0218	0	Intragenic	Antisense
NC_016856.1_216123	216123	-	gene	216137	217033	-	STM14_0219	14	Intergenic	Sense
NC_016856.1_217227	217227	-	gene	217102	217557	-	STM14_0220	0	Intragenic	Sense
NC_016856.1_217269	217269	-	gene	217102	217557	-	STM14_0220	0	Intragenic	Sense
NC_016856.1_217420	217420	-	gene	217102	217557	-	STM14_0220	0	Intragenic	Sense
NC_016856.1_217443	217443	+	gene	217102	217557	-	STM14_0220	0	Intragenic	Antisense
NC_016856.1_217607	217607	-	gene	217102	217557	-	STM14_0220	-50	Intergenic	Sense
NC_016856.1_217609	217609	-	gene	217102	217557	-	STM14_0220	-52	Intergenic	Sense
NC_016856.1_217646	217646	-	gene	217734	218438	-	STM14_0221	88	Intergenic	Sense
NC_016856.1_217647	217647	-	gene	217734	218438	-	STM14_0221	87	Intergenic	Sense
NC_016856.1_217840	217840	-	gene	217734	218438	-	STM14_0221	0	Intragenic	Sense
NC_016856.1_218030	218030	-	gene	217734	218438	-	STM14_0221	0	Intragenic	Sense
NC_016856.1_218079	218079	+	gene	217734	218438	-	STM14_0221	0	Intragenic	Antisense
NC_016856.1_218278	218278	+	gene	217734	218438	-	STM14_0221	0	Intragenic	Antisense
NC_016856.1_219006	219006	-	gene	219013	221487	+	STM14_0223	7	Intergenic	Antisense
NC_016856.1_219030	219030	+	gene	219013	221487	+	STM14_0223	0	Intragenic	Sense
NC_016856.1_219884	219884	+	gene	219013	221487	+	STM14_0223	0	Intragenic	Sense
NC_016856.1_220786	220786	+	gene	219013	221487	+	STM14_0223	0	Intragenic	Sense
NC_016856.1_221084	221084	+	gene	219013	221487	+	STM14_0223	0	Intragenic	Sense
NC_016856.1_221102	221102	+	gene	219013	221487	+	STM14_0223	0	Intragenic	Sense
NC_016856.1_221188	221188	+	gene	219013	221487	+	STM14_0223	0	Intragenic	Sense
NC_016856.1_221737	221737	+	gene	221628	224150	+	STM14_0226	0	Intragenic	Sense
NC_016856.1_222526	222526	+	gene	221628	224150	+	STM14_0226	0	Intragenic	Sense
NC_016856.1_223560	223560	+	gene	221628	224150	+	STM14_0226	0	Intragenic	Sense
NC_016856.1_223570	223570	+	gene	221628	224150	+	STM14_0226	0	Intragenic	Sense
NC_016856.1_224265	224265	-	gene	221628	224150	+	STM14_0226	-115	Intergenic	Antisense
NC_016856.1_225417	225417	-	gene	224443	226632	+	STM14_0228	0	Intragenic	Antisense
NC_016856.1_225607	225607	+	gene	224443	226632	+	STM14_0228	0	Intragenic	Sense
NC_016856.1_225958	225958	-	gene	224443	226632	+	STM14_0228	0	Intragenic	Antisense
NC_016856.1_226239	226239	+	gene	224443	226632	+	STM14_0228	0	Intragenic	Sense
NC_016856.1_226267	226267	+	gene	224443	226632	+	STM14_0228	0	Intragenic	Sense
NC_016856.1_228769	228769	+	gene	228365	230422	+	STM14_0231	0	Intragenic	Sense
NC_016856.1_231994	231994	+	gene	232007	234664	+	STM14_0235	13	Intergenic	Sense
NC_016856.1_232357	232357	+	gene	232007	234664	+	STM14_0235	0	Intragenic	Sense
NC_016856.1_232984	232984	-	gene	232007	234664	+	STM14_0235	0	Intragenic	Antisense
NC_016856.1_234383	234383	-	gene	232007	234664	+	STM14_0235	0	Intragenic	Antisense
NC_016856.1_235391	235391	+	gene	234682	235434	+	STM14_0236	0	Intragenic	Sense
NC_016856.1_236976	236976	+	gene	236968	237807	+	STM14_0240	0	Intragenic	Sense
NC_016856.1_237155	237155	+	gene	236968	237807	+	STM14_0240	0	Intragenic	Sense
NC_016856.1_237777	237777	-	gene	236968	237807	+	STM14_0240	0	Intragenic	Antisense
NC_016856.1_237799	237799	+	gene	236968	237807	+	STM14_0240	0	Intragenic	Sense
NC_016856.1_237947	237947	-	gene	237915	239195	-	STM14_0241	0	Intragenic	Sense
NC_016856.1_238082	238082	-	gene	237915	239195	-	STM14_0241	0	Intragenic	Sense
NC_016856.1_238090	238090	-	gene	237915	239195	-	STM14_0241	0	Intragenic	Sense
NC_016856.1_238785	238785	-	gene	237915	239195	-	STM14_0241	0	Intragenic	Sense
NC_016856.1_239227	239227	-	gene	237915	239195	-	STM14_0241	-32	Intergenic	Sense
NC_016856.1_239245	239245	+	gene	237915	239195	-	STM14_0241	-50	Intergenic	Antisense
NC_016856.1_239247	239247	-	gene	237915	239195	-	STM14_0241	-52	Intergenic	Sense
NC_016856.1_240285	240285	+	gene	239365	240786	+	STM14_0243	0	Intragenic	Sense
NC_016856.1_240706	240706	+	gene	239365	240786	+	STM14_0243	0	Intragenic	Sense
NC_016856.1_240819	240819	+	gene	239365	240786	+	STM14_0243	-33	Intergenic	Sense
NC_016856.1_240841	240841	+	gene	240868	241212	+	STM14_0244	27	Intergenic	Sense
NC_016856.1_240874	240874	+	gene	240868	241212	+	STM14_0244	0	Intragenic	Sense
NC_016856.1_241719	241719	+	gene	241313	241936	-	STM14_0245	0	Intragenic	Antisense
NC_016856.1_241906	241906	-	gene	241313	241936	-	STM14_0245	0	Intragenic	Sense
NC_016856.1_242011	242011	-	gene	241973	242773	-	STM14_0246	0	Intragenic	Sense
NC_016856.1_242085	242085	-	gene	241973	242773	-	STM14_0246	0	Intragenic	Sense
NC_016856.1_243515	243515	+	gene	243549	245066	+	STM14_0248	34	Intergenic	Sense
NC_016856.1_244263	244263	+	gene	243549	245066	+	STM14_0248	0	Intragenic	Sense
NC_016856.1_244368	244368	+	gene	243549	245066	+	STM14_0248	0	Intragenic	Sense
NC_016856.1_244422	244422	-	gene	243549	245066	+	STM14_0248	0	Intragenic	Antisense
NC_016856.1_245065	245065	+	gene	243549	245066	+	STM14_0248	0	Intragenic	Sense
NC_016856.1_245149	245149	+	gene	245196	246623	+	STM14_0249	47	Intergenic	Sense
NC_016856.1_245156	245156	+	gene	245196	246623	+	STM14_0249	40	Intergenic	Sense
NC_016856.1_245221	245221	+	gene	245196	246623	+	STM14_0249	0	Intragenic	Sense
NC_016856.1_245664	245664	+	gene	245196	246623	+	STM14_0249	0	Intragenic	Sense
NC_016856.1_246555	246555	+	gene	245196	246623	+	STM14_0249	0	Intragenic	Sense
NC_016856.1_248057	248057	-	gene	248022	248408	-	STM14_0251	0	Intragenic	Sense
NC_016856.1_248144	248144	-	gene	248022	248408	-	STM14_0251	0	Intragenic	Sense
NC_016856.1_248202	248202	-	gene	248022	248408	-	STM14_0251	0	Intragenic	Sense
NC_016856.1_248420	248420	-	gene	248022	248408	-	STM14_0251	-12	Intergenic	Sense
NC_016856.1_248434	248434	-	gene	248022	248408	-	STM14_0251	-26	Intergenic	Sense
NC_016856.1_248679	248679	+	pseudogene	248655	249957	+	STM14_0252	0	Intragenic	Sense
NC_016856.1_249389	249389	-	pseudogene	248655	249957	+	STM14_0252	0	Intragenic	Antisense
NC_016856.1_249495	249495	-	pseudogene	248655	249957	+	STM14_0252	0	Intragenic	Antisense
NC_016856.1_249505	249505	+	pseudogene	248655	249957	+	STM14_0252	0	Intragenic	Sense
NC_016856.1_249669	249669	+	pseudogene	248655	249957	+	STM14_0252	0	Intragenic	Sense
NC_016856.1_249712	249712	+	pseudogene	248655	249957	+	STM14_0252	0	Intragenic	Sense
NC_016856.1_249863	249863	+	pseudogene	248655	249957	+	STM14_0252	0	Intragenic	Sense
NC_016856.1_250846	250846	-	gene	250848	253520	-	STM14_0254	2	Intergenic	Sense
NC_016856.1_250848	250848	-	gene	250848	253520	-	STM14_0254	0	Intragenic	Sense
NC_016856.1_253648	253648	-	gene	253608	253856	+	STM14_RS25825	0	Intragenic	Antisense
NC_016856.1_253829	253829	-	gene	253608	253856	+	STM14_RS25825	0	Intragenic	Antisense
NC_016856.1_253829	253829	-	gene	253757	254551	-	STM14_0255	0	Intragenic	Sense
NC_016856.1_254263	254263	-	gene	253757	254551	-	STM14_0255	0	Intragenic	Sense
NC_016856.1_254597	254597	+	pseudogene	254554	254850	-	STM14_RS25830	0	Intragenic	Antisense
NC_016856.1_254598	254598	-	pseudogene	254554	254850	-	STM14_RS25830	0	Intragenic	Sense
NC_016856.1_254787	254787	-	pseudogene	254554	254850	-	STM14_RS25830	0	Intragenic	Sense
NC_016856.1_254826	254826	+	pseudogene	254554	254850	-	STM14_RS25830	0	Intragenic	Antisense
NC_016856.1_254836	254836	+	pseudogene	254554	254850	-	STM14_RS25830	0	Intragenic	Antisense
NC_016856.1_255209	255209	+	gene	255002	255727	+	STM14_0257	0	Intragenic	Sense
NC_016856.1_255569	255569	+	gene	255002	255727	+	STM14_0257	0	Intragenic	Sense
NC_016856.1_255758	255758	+	pseudogene	255679	255965	-	STM14_RS24370	0	Intragenic	Antisense
NC_016856.1_256231	256231	+	gene	255985	256836	+	STM14_0258	0	Intragenic	Sense
NC_016856.1_256378	256378	+	gene	255985	256836	+	STM14_0258	0	Intragenic	Sense
NC_016856.1_256556	256556	-	gene	255985	256836	+	STM14_0258	0	Intragenic	Antisense
NC_016856.1_256938	256938	+	gene	256981	257706	+	STM14_0259	43	Intergenic	Sense
NC_016856.1_257744	257744	+	gene	256981	257706	+	STM14_0259	-38	Intergenic	Sense
NC_016856.1_257780	257780	+	gene	257853	258410	+	STM14_0260	73	Intergenic	Sense
NC_016856.1_257795	257795	+	gene	257853	258410	+	STM14_0260	58	Intergenic	Sense
NC_016856.1_257803	257803	+	gene	257853	258410	+	STM14_0260	50	Intergenic	Sense
NC_016856.1_257814	257814	+	gene	257853	258410	+	STM14_0260	39	Intergenic	Sense
NC_016856.1_257840	257840	+	gene	257853	258410	+	STM14_0260	13	Intergenic	Sense
NC_016856.1_257981	257981	+	gene	257853	258410	+	STM14_0260	0	Intragenic	Sense
NC_016856.1_258500	258500	+	gene	258551	259747	+	STM14_0261	51	Intergenic	Sense
NC_016856.1_258629	258629	+	gene	258551	259747	+	STM14_0261	0	Intragenic	Sense
NC_016856.1_259037	259037	-	gene	258551	259747	+	STM14_0261	0	Intragenic	Antisense
NC_016856.1_259794	259794	+	gene	259830	260033	+	STM14_0262	36	Intergenic	Sense
NC_016856.1_260135	260135	+	gene	260060	260818	+	STM14_0263	0	Intragenic	Sense
NC_016856.1_260709	260709	+	gene	260060	260818	+	STM14_0263	0	Intragenic	Sense
NC_016856.1_261314	261314	+	gene	260831	261688	+	STM14_0264	0	Intragenic	Sense
NC_016856.1_261560	261560	+	gene	260831	261688	+	STM14_0264	0	Intragenic	Sense
NC_016856.1_262180	262180	+	gene	261700	263052	+	STM14_0265	0	Intragenic	Sense
NC_016856.1_262319	262319	+	gene	261700	263052	+	STM14_0265	0	Intragenic	Sense
NC_016856.1_262341	262341	+	gene	261700	263052	+	STM14_0265	0	Intragenic	Sense
NC_016856.1_262507	262507	+	gene	261700	263052	+	STM14_0265	0	Intragenic	Sense
NC_016856.1_262884	262884	+	gene	261700	263052	+	STM14_0265	0	Intragenic	Sense
NC_016856.1_263418	263418	+	gene	263084	265498	+	STM14_0266	0	Intragenic	Sense
NC_016856.1_264524	264524	+	gene	263084	265498	+	STM14_0266	0	Intragenic	Sense
NC_016856.1_264584	264584	-	gene	263084	265498	+	STM14_0266	0	Intragenic	Antisense
NC_016856.1_265118	265118	+	gene	263084	265498	+	STM14_0266	0	Intragenic	Sense
NC_016856.1_265134	265134	+	gene	263084	265498	+	STM14_0266	0	Intragenic	Sense
NC_016856.1_265444	265444	+	gene	263084	265498	+	STM14_0266	0	Intragenic	Sense
NC_016856.1_265676	265676	+	gene	265621	266106	+	STM14_0267	0	Intragenic	Sense
NC_016856.1_265765	265765	+	gene	265621	266106	+	STM14_0267	0	Intragenic	Sense
NC_016856.1_265875	265875	+	gene	265621	266106	+	STM14_0267	0	Intragenic	Sense
NC_016856.1_266257	266257	-	gene	266110	267135	+	STM14_0268	0	Intragenic	Antisense
NC_016856.1_266515	266515	+	gene	266110	267135	+	STM14_0268	0	Intragenic	Sense
NC_016856.1_266623	266623	+	gene	266110	267135	+	STM14_0268	0	Intragenic	Sense
NC_016856.1_266664	266664	-	gene	266110	267135	+	STM14_0268	0	Intragenic	Antisense
NC_016856.1_266854	266854	+	gene	266110	267135	+	STM14_0268	0	Intragenic	Sense
NC_016856.1_267063	267063	+	gene	266110	267135	+	STM14_0268	0	Intragenic	Sense
NC_016856.1_267212	267212	+	gene	267241	267696	+	STM14_0269	29	Intergenic	Sense
NC_016856.1_267250	267250	+	gene	267241	267696	+	STM14_0269	0	Intragenic	Sense
NC_016856.1_267268	267268	+	gene	267241	267696	+	STM14_0269	0	Intragenic	Sense
NC_016856.1_267501	267501	+	gene	267241	267696	+	STM14_0269	0	Intragenic	Sense
NC_016856.1_268015	268015	+	gene	267700	268488	+	STM14_0270	0	Intragenic	Sense
NC_016856.1_268760	268760	-	gene	268488	269636	+	STM14_0271	0	Intragenic	Antisense
NC_016856.1_269792	269792	-	gene	269633	270229	+	STM14_0272	0	Intragenic	Antisense
NC_016856.1_269841	269841	+	gene	269633	270229	+	STM14_0272	0	Intragenic	Sense
NC_016856.1_269950	269950	+	gene	269633	270229	+	STM14_0272	0	Intragenic	Sense
NC_016856.1_270261	270261	+	gene	270253	273735	+	STM14_0273	0	Intragenic	Sense
NC_016856.1_270307	270307	+	gene	270253	273735	+	STM14_0273	0	Intragenic	Sense
NC_016856.1_270958	270958	-	gene	270253	273735	+	STM14_0273	0	Intragenic	Antisense
NC_016856.1_271952	271952	+	gene	270253	273735	+	STM14_0273	0	Intragenic	Sense
NC_016856.1_272154	272154	+	gene	270253	273735	+	STM14_0273	0	Intragenic	Sense
NC_016856.1_273403	273403	+	gene	270253	273735	+	STM14_0273	0	Intragenic	Sense
NC_016856.1_273455	273455	+	gene	270253	273735	+	STM14_0273	0	Intragenic	Sense
NC_016856.1_273539	273539	+	gene	270253	273735	+	STM14_0273	0	Intragenic	Sense
NC_016856.1_274042	274042	+	gene	273748	274707	+	STM14_0274	0	Intragenic	Sense
NC_016856.1_275217	275217	+	gene	274887	276650	+	STM14_0275	0	Intragenic	Sense
NC_016856.1_275446	275446	+	gene	274887	276650	+	STM14_0275	0	Intragenic	Sense
NC_016856.1_275702	275702	+	gene	274887	276650	+	STM14_0275	0	Intragenic	Sense
NC_016856.1_276093	276093	+	gene	274887	276650	+	STM14_0275	0	Intragenic	Sense
NC_016856.1_276290	276290	+	gene	274887	276650	+	STM14_0275	0	Intragenic	Sense
NC_016856.1_276706	276706	+	gene	276726	278867	+	STM14_0276	20	Intergenic	Sense
NC_016856.1_276755	276755	-	gene	276726	278867	+	STM14_0276	0	Intragenic	Antisense
NC_016856.1_276846	276846	+	gene	276726	278867	+	STM14_0276	0	Intragenic	Sense
NC_016856.1_277410	277410	+	gene	276726	278867	+	STM14_0276	0	Intragenic	Sense
NC_016856.1_277450	277450	+	gene	276726	278867	+	STM14_0276	0	Intragenic	Sense
NC_016856.1_278904	278904	+	gene	278923	279312	+	STM14_0277	19	Intergenic	Sense
NC_016856.1_278905	278905	+	gene	278923	279312	+	STM14_0277	18	Intergenic	Sense
NC_016856.1_279013	279013	+	gene	278923	279312	+	STM14_0277	0	Intragenic	Sense
NC_016856.1_279271	279271	+	gene	278923	279312	+	STM14_0277	0	Intragenic	Sense
NC_016856.1_279351	279351	+	gene	279375	280667	+	STM14_0278	24	Intergenic	Sense
NC_016856.1_280068	280068	-	gene	279375	280667	+	STM14_0278	0	Intragenic	Antisense
NC_016856.1_280487	280487	+	gene	279375	280667	+	STM14_0278	0	Intragenic	Sense
NC_016856.1_280762	280762	-	gene	280751	281011	-	STM14_0279	0	Intragenic	Sense
NC_016856.1_280911	280911	-	gene	280751	281011	-	STM14_0279	0	Intragenic	Sense
NC_016856.1_280922	280922	-	gene	280751	281011	-	STM14_0279	0	Intragenic	Sense
NC_016856.1_281208	281208	-	gene	280998	281216	-	STM14_0280	0	Intragenic	Sense
NC_016856.1_281230	281230	-	gene	280998	281216	-	STM14_0280	-14	Intergenic	Sense
NC_016856.1_281236	281236	-	gene	280998	281216	-	STM14_0280	-20	Intergenic	Sense
NC_016856.1_281270	281270	-	gene	280998	281216	-	STM14_0280	-54	Intergenic	Sense
NC_016856.1_281550	281550	+	gene	281396	281941	+	STM14_0281	0	Intragenic	Sense
NC_016856.1_282094	282094	+	gene	281938	282360	+	STM14_0282	0	Intragenic	Sense
NC_016856.1_282380	282380	-	gene	282392	283093	+	STM14_0283	12	Intergenic	Antisense
NC_016856.1_283184	283184	-	gene	283167	284885	-	STM14_0284	0	Intragenic	Sense
NC_016856.1_284946	284946	-	gene	284996	285703	-	STM14_0285	50	Intergenic	Sense
NC_016856.1_285097	285097	-	gene	284996	285703	-	STM14_0285	0	Intragenic	Sense
NC_016856.1_285801	285801	-	gene	285700	286104	-	STM14_0286	0	Intragenic	Sense
NC_016856.1_286131	286131	-	gene	285700	286104	-	STM14_0286	-27	Intergenic	Sense
NC_016856.1_286296	286296	-	gene	286223	287038	-	STM14_0287	0	Intragenic	Sense
NC_016856.1_286376	286376	-	gene	286223	287038	-	STM14_0287	0	Intragenic	Sense
NC_016856.1_286822	286822	-	gene	286223	287038	-	STM14_0287	0	Intragenic	Sense
NC_016856.1_286939	286939	-	gene	286223	287038	-	STM14_0287	0	Intragenic	Sense
NC_016856.1_287116	287116	-	gene	287077	287730	-	STM14_0288	0	Intragenic	Sense
NC_016856.1_287160	287160	-	gene	287077	287730	-	STM14_0288	0	Intragenic	Sense
NC_016856.1_287169	287169	-	gene	287077	287730	-	STM14_0288	0	Intragenic	Sense
NC_016856.1_287178	287178	-	gene	287077	287730	-	STM14_0288	0	Intragenic	Sense
NC_016856.1_287185	287185	+	gene	287077	287730	-	STM14_0288	0	Intragenic	Antisense
NC_016856.1_288145	288145	-	gene	287723	288754	-	STM14_0289	0	Intragenic	Sense
NC_016856.1_288492	288492	+	gene	287723	288754	-	STM14_0289	0	Intragenic	Antisense
NC_016856.1_288541	288541	+	gene	287723	288754	-	STM14_0289	0	Intragenic	Antisense
NC_016856.1_288824	288824	-	gene	287723	288754	-	STM14_0289	-70	Intergenic	Sense
NC_016856.1_288917	288917	+	gene	288944	289510	+	STM14_0290	27	Intergenic	Sense
NC_016856.1_289577	289577	-	gene	289611	289832	+	STM14_RS25835	34	Intergenic	Antisense
NC_016856.1_289596	289596	+	gene	289611	289832	+	STM14_RS25835	15	Intergenic	Sense
NC_016856.1_289702	289702	+	gene	289611	289832	+	STM14_RS25835	0	Intragenic	Sense
NC_016856.1_289764	289764	+	gene	289611	289832	+	STM14_RS25835	0	Intragenic	Sense
NC_016856.1_289843	289843	-	gene	289611	289832	+	STM14_RS25835	-11	Intergenic	Antisense
NC_016856.1_289879	289879	+	gene	289877	291432	+	STM14_0293	0	Intragenic	Sense
NC_016856.1_289890	289890	+	gene	289877	291432	+	STM14_0293	0	Intragenic	Sense
NC_016856.1_289892	289892	+	gene	289877	291432	+	STM14_0293	0	Intragenic	Sense
NC_016856.1_289904	289904	+	gene	289877	291432	+	STM14_0293	0	Intragenic	Sense
NC_016856.1_289931	289931	+	gene	289877	291432	+	STM14_0293	0	Intragenic	Sense
NC_016856.1_289933	289933	+	gene	289877	291432	+	STM14_0293	0	Intragenic	Sense
NC_016856.1_289968	289968	+	gene	289877	291432	+	STM14_0293	0	Intragenic	Sense
NC_016856.1_289974	289974	+	gene	289877	291432	+	STM14_0293	0	Intragenic	Sense
NC_016856.1_289986	289986	+	gene	289877	291432	+	STM14_0293	0	Intragenic	Sense
NC_016856.1_289991	289991	+	gene	289877	291432	+	STM14_0293	0	Intragenic	Sense
NC_016856.1_290203	290203	+	gene	289877	291432	+	STM14_0293	0	Intragenic	Sense
NC_016856.1_290420	290420	+	gene	289877	291432	+	STM14_0293	0	Intragenic	Sense
NC_016856.1_290421	290421	+	gene	289877	291432	+	STM14_0293	0	Intragenic	Sense
NC_016856.1_290428	290428	+	gene	289877	291432	+	STM14_0293	0	Intragenic	Sense
NC_016856.1_290434	290434	+	gene	289877	291432	+	STM14_0293	0	Intragenic	Sense
NC_016856.1_290461	290461	+	gene	289877	291432	+	STM14_0293	0	Intragenic	Sense
NC_016856.1_290503	290503	+	gene	289877	291432	+	STM14_0293	0	Intragenic	Sense
NC_016856.1_290504	290504	+	gene	289877	291432	+	STM14_0293	0	Intragenic	Sense
NC_016856.1_290513	290513	+	gene	289877	291432	+	STM14_0293	0	Intragenic	Sense
NC_016856.1_290531	290531	+	gene	289877	291432	+	STM14_0293	0	Intragenic	Sense
NC_016856.1_290541	290541	+	gene	289877	291432	+	STM14_0293	0	Intragenic	Sense
NC_016856.1_290547	290547	+	gene	289877	291432	+	STM14_0293	0	Intragenic	Sense
NC_016856.1_290570	290570	+	gene	289877	291432	+	STM14_0293	0	Intragenic	Sense
NC_016856.1_290604	290604	+	gene	289877	291432	+	STM14_0293	0	Intragenic	Sense
NC_016856.1_290605	290605	+	gene	289877	291432	+	STM14_0293	0	Intragenic	Sense
NC_016856.1_290618	290618	+	gene	289877	291432	+	STM14_0293	0	Intragenic	Sense
NC_016856.1_290623	290623	+	gene	289877	291432	+	STM14_0293	0	Intragenic	Sense
NC_016856.1_290721	290721	+	gene	289877	291432	+	STM14_0293	0	Intragenic	Sense
NC_016856.1_290750	290750	+	gene	289877	291432	+	STM14_0293	0	Intragenic	Sense
NC_016856.1_290890	290890	+	gene	289877	291432	+	STM14_0293	0	Intragenic	Sense
NC_016856.1_290910	290910	+	gene	289877	291432	+	STM14_0293	0	Intragenic	Sense
NC_016856.1_290924	290924	+	gene	289877	291432	+	STM14_0293	0	Intragenic	Sense
NC_016856.1_290934	290934	+	gene	289877	291432	+	STM14_0293	0	Intragenic	Sense
NC_016856.1_290949	290949	+	gene	289877	291432	+	STM14_0293	0	Intragenic	Sense
NC_016856.1_291015	291015	+	gene	289877	291432	+	STM14_0293	0	Intragenic	Sense
NC_016856.1_291047	291047	+	gene	289877	291432	+	STM14_0293	0	Intragenic	Sense
NC_016856.1_291167	291167	+	gene	289877	291432	+	STM14_0293	0	Intragenic	Sense
NC_016856.1_291209	291209	+	gene	289877	291432	+	STM14_0293	0	Intragenic	Sense
NC_016856.1_291350	291350	+	gene	289877	291432	+	STM14_0293	0	Intragenic	Sense
NC_016856.1_291454	291454	+	gene	289877	291432	+	STM14_0293	-22	Intergenic	Sense
NC_016856.1_291490	291490	+	gene	291490	291566	+	STM14_0294	0	Intragenic	Sense
NC_016856.1_291603	291603	-	gene	291490	291566	+	STM14_0294	-37	Intergenic	Antisense
NC_016856.1_291612	291612	+	gene	291490	291566	+	STM14_0294	-46	Intergenic	Sense
NC_016856.1_291676	291676	+	gene	291676	291751	+	STM14_0295	0	Intragenic	Sense
NC_016856.1_291716	291716	+	gene	291676	291751	+	STM14_0295	0	Intragenic	Sense
NC_016856.1_291811	291811	+	gene	291676	291751	+	STM14_0295	-60	Intergenic	Sense
NC_016856.1_291934	291934	+	gene	291925	295036	+	STM14_0297	0	Intragenic	Sense
NC_016856.1_291942	291942	+	gene	291925	295036	+	STM14_0297	0	Intragenic	Sense
NC_016856.1_291983	291983	+	gene	291925	295036	+	STM14_0297	0	Intragenic	Sense
NC_016856.1_292193	292193	+	gene	291925	295036	+	STM14_0297	0	Intragenic	Sense
NC_016856.1_292194	292194	+	gene	291925	295036	+	STM14_0297	0	Intragenic	Sense
NC_016856.1_292218	292218	+	gene	291925	295036	+	STM14_0297	0	Intragenic	Sense
NC_016856.1_292219	292219	+	gene	291925	295036	+	STM14_0297	0	Intragenic	Sense
NC_016856.1_292286	292286	+	gene	291925	295036	+	STM14_0297	0	Intragenic	Sense
NC_016856.1_292317	292317	+	gene	291925	295036	+	STM14_0297	0	Intragenic	Sense
NC_016856.1_292361	292361	+	gene	291925	295036	+	STM14_0297	0	Intragenic	Sense
NC_016856.1_292370	292370	+	gene	291925	295036	+	STM14_0297	0	Intragenic	Sense
NC_016856.1_292430	292430	+	gene	291925	295036	+	STM14_0297	0	Intragenic	Sense
NC_016856.1_292581	292581	+	gene	291925	295036	+	STM14_0297	0	Intragenic	Sense
NC_016856.1_292588	292588	+	gene	291925	295036	+	STM14_0297	0	Intragenic	Sense
NC_016856.1_292608	292608	+	gene	291925	295036	+	STM14_0297	0	Intragenic	Sense
NC_016856.1_292610	292610	+	gene	291925	295036	+	STM14_0297	0	Intragenic	Sense
NC_016856.1_292750	292750	+	gene	291925	295036	+	STM14_0297	0	Intragenic	Sense
NC_016856.1_292785	292785	+	gene	291925	295036	+	STM14_0297	0	Intragenic	Sense
NC_016856.1_292790	292790	+	gene	291925	295036	+	STM14_0297	0	Intragenic	Sense
NC_016856.1_292881	292881	+	gene	291925	295036	+	STM14_0297	0	Intragenic	Sense
NC_016856.1_292883	292883	+	gene	291925	295036	+	STM14_0297	0	Intragenic	Sense
NC_016856.1_292979	292979	+	gene	291925	295036	+	STM14_0297	0	Intragenic	Sense
NC_016856.1_293052	293052	+	gene	291925	295036	+	STM14_0297	0	Intragenic	Sense
NC_016856.1_293055	293055	+	gene	291925	295036	+	STM14_0297	0	Intragenic	Sense
NC_016856.1_293088	293088	+	gene	291925	295036	+	STM14_0297	0	Intragenic	Sense
NC_016856.1_293089	293089	+	gene	291925	295036	+	STM14_0297	0	Intragenic	Sense
NC_016856.1_293291	293291	+	gene	291925	295036	+	STM14_0297	0	Intragenic	Sense
NC_016856.1_293312	293312	+	gene	291925	295036	+	STM14_0297	0	Intragenic	Sense
NC_016856.1_293340	293340	+	gene	291925	295036	+	STM14_0297	0	Intragenic	Sense
NC_016856.1_293353	293353	+	gene	291925	295036	+	STM14_0297	0	Intragenic	Sense
NC_016856.1_293481	293481	+	gene	291925	295036	+	STM14_0297	0	Intragenic	Sense
NC_016856.1_293483	293483	+	gene	291925	295036	+	STM14_0297	0	Intragenic	Sense
NC_016856.1_293529	293529	+	gene	291925	295036	+	STM14_0297	0	Intragenic	Sense
NC_016856.1_293531	293531	+	gene	291925	295036	+	STM14_0297	0	Intragenic	Sense
NC_016856.1_293541	293541	+	gene	291925	295036	+	STM14_0297	0	Intragenic	Sense
NC_016856.1_293542	293542	+	gene	291925	295036	+	STM14_0297	0	Intragenic	Sense
NC_016856.1_293581	293581	+	gene	291925	295036	+	STM14_0297	0	Intragenic	Sense
NC_016856.1_293609	293609	+	gene	291925	295036	+	STM14_0297	0	Intragenic	Sense
NC_016856.1_293624	293624	+	gene	291925	295036	+	STM14_0297	0	Intragenic	Sense
NC_016856.1_293631	293631	+	gene	291925	295036	+	STM14_0297	0	Intragenic	Sense
NC_016856.1_293655	293655	+	gene	291925	295036	+	STM14_0297	0	Intragenic	Sense
NC_016856.1_293752	293752	+	gene	291925	295036	+	STM14_0297	0	Intragenic	Sense
NC_016856.1_293770	293770	+	gene	291925	295036	+	STM14_0297	0	Intragenic	Sense
NC_016856.1_293782	293782	+	gene	291925	295036	+	STM14_0297	0	Intragenic	Sense
NC_016856.1_293843	293843	+	gene	291925	295036	+	STM14_0297	0	Intragenic	Sense
NC_016856.1_293855	293855	+	gene	291925	295036	+	STM14_0297	0	Intragenic	Sense
NC_016856.1_293925	293925	+	gene	291925	295036	+	STM14_0297	0	Intragenic	Sense
NC_016856.1_293926	293926	+	gene	291925	295036	+	STM14_0297	0	Intragenic	Sense
NC_016856.1_294206	294206	+	gene	291925	295036	+	STM14_0297	0	Intragenic	Sense
NC_016856.1_294226	294226	+	gene	291925	295036	+	STM14_0297	0	Intragenic	Sense
NC_016856.1_294242	294242	+	gene	291925	295036	+	STM14_0297	0	Intragenic	Sense
NC_016856.1_294328	294328	+	gene	291925	295036	+	STM14_0297	0	Intragenic	Sense
NC_016856.1_294347	294347	+	gene	291925	295036	+	STM14_0297	0	Intragenic	Sense
NC_016856.1_294355	294355	+	gene	291925	295036	+	STM14_0297	0	Intragenic	Sense
NC_016856.1_294358	294358	+	gene	291925	295036	+	STM14_0297	0	Intragenic	Sense
NC_016856.1_294406	294406	+	gene	291925	295036	+	STM14_0297	0	Intragenic	Sense
NC_016856.1_294434	294434	+	gene	291925	295036	+	STM14_0297	0	Intragenic	Sense
NC_016856.1_294464	294464	+	gene	291925	295036	+	STM14_0297	0	Intragenic	Sense
NC_016856.1_294508	294508	+	gene	291925	295036	+	STM14_0297	0	Intragenic	Sense
NC_016856.1_294589	294589	+	gene	291925	295036	+	STM14_0297	0	Intragenic	Sense
NC_016856.1_294591	294591	+	gene	291925	295036	+	STM14_0297	0	Intragenic	Sense
NC_016856.1_294593	294593	+	gene	291925	295036	+	STM14_0297	0	Intragenic	Sense
NC_016856.1_294686	294686	+	gene	291925	295036	+	STM14_0297	0	Intragenic	Sense
NC_016856.1_294689	294689	+	gene	291925	295036	+	STM14_0297	0	Intragenic	Sense
NC_016856.1_294740	294740	+	gene	291925	295036	+	STM14_0297	0	Intragenic	Sense
NC_016856.1_294774	294774	+	gene	291925	295036	+	STM14_0297	0	Intragenic	Sense
NC_016856.1_294912	294912	+	gene	291925	295036	+	STM14_0297	0	Intragenic	Sense
NC_016856.1_294917	294917	+	gene	291925	295036	+	STM14_0297	0	Intragenic	Sense
NC_016856.1_294938	294938	+	gene	291925	295036	+	STM14_0297	0	Intragenic	Sense
NC_016856.1_294948	294948	+	gene	291925	295036	+	STM14_0297	0	Intragenic	Sense
NC_016856.1_295033	295033	+	gene	291925	295036	+	STM14_0297	0	Intragenic	Sense
NC_016856.1_295219	295219	+	gene	295221	295336	+	STM14_0298	2	Intergenic	Sense
NC_016856.1_295250	295250	+	gene	295221	295336	+	STM14_0298	0	Intragenic	Sense
NC_016856.1_295257	295257	+	gene	295221	295336	+	STM14_0298	0	Intragenic	Sense
NC_016856.1_295258	295258	+	gene	295221	295336	+	STM14_0298	0	Intragenic	Sense
NC_016856.1_295268	295268	+	gene	295221	295336	+	STM14_0298	0	Intragenic	Sense
NC_016856.1_295319	295319	+	gene	295221	295336	+	STM14_0298	0	Intragenic	Sense
NC_016856.1_295499	295499	+	gene	295528	295604	+	STM14_0299	29	Intergenic	Sense
NC_016856.1_295528	295528	+	gene	295528	295604	+	STM14_0299	0	Intragenic	Sense
NC_016856.1_295541	295541	+	gene	295528	295604	+	STM14_0299	0	Intragenic	Sense
NC_016856.1_295549	295549	+	gene	295528	295604	+	STM14_0299	0	Intragenic	Sense
NC_016856.1_295651	295651	-	gene	295528	295604	+	STM14_0299	-47	Intergenic	Antisense
NC_016856.1_295734	295734	+	gene	295769	296572	+	STM14_0300	35	Intergenic	Sense
NC_016856.1_295898	295898	+	gene	295769	296572	+	STM14_0300	0	Intragenic	Sense
NC_016856.1_295999	295999	+	gene	295769	296572	+	STM14_0300	0	Intragenic	Sense
NC_016856.1_296127	296127	+	gene	295769	296572	+	STM14_0300	0	Intragenic	Sense
NC_016856.1_296770	296770	-	gene	296593	297507	-	STM14_0301	0	Intragenic	Sense
NC_016856.1_297894	297894	+	gene	297612	298787	+	STM14_0302	0	Intragenic	Sense
NC_016856.1_298860	298860	+	gene	298919	299719	+	STM14_0303	59	Intergenic	Sense
NC_016856.1_299386	299386	-	gene	298919	299719	+	STM14_0303	0	Intragenic	Antisense
NC_016856.1_299514	299514	-	gene	298919	299719	+	STM14_0303	0	Intragenic	Antisense
NC_016856.1_299768	299768	-	gene	299797	300567	+	STM14_0304	29	Intergenic	Antisense
NC_016856.1_300525	300525	-	gene	299797	300567	+	STM14_0304	0	Intragenic	Antisense
NC_016856.1_300653	300653	+	gene	300623	301990	-	STM14_0305	0	Intragenic	Antisense
NC_016856.1_300922	300922	-	gene	300623	301990	-	STM14_0305	0	Intragenic	Sense
NC_016856.1_302017	302017	-	gene	300623	301990	-	STM14_0305	-27	Intergenic	Sense
NC_016856.1_302253	302253	+	gene	302062	302817	-	STM14_0306	0	Intragenic	Antisense
NC_016856.1_302264	302264	+	gene	302062	302817	-	STM14_0306	0	Intragenic	Antisense
NC_016856.1_302820	302820	+	gene	302062	302817	-	STM14_0306	-3	Intergenic	Antisense
NC_016856.1_302983	302983	-	gene	302852	303574	+	STM14_0307	0	Intragenic	Antisense
NC_016856.1_303308	303308	+	gene	302852	303574	+	STM14_0307	0	Intragenic	Sense
NC_016856.1_303973	303973	+	gene	303571	304038	-	STM14_0308	0	Intragenic	Antisense
NC_016856.1_304057	304057	+	gene	303571	304038	-	STM14_0308	-19	Intergenic	Antisense
NC_016856.1_304557	304557	-	gene	304102	304833	+	STM14_0309	0	Intragenic	Antisense
NC_016856.1_304613	304613	-	gene	304102	304833	+	STM14_0309	0	Intragenic	Antisense
NC_016856.1_304967	304967	+	gene	304967	305043	+	STM14_0311	0	Intragenic	Sense
NC_016856.1_304988	304988	+	gene	304967	305043	+	STM14_0311	0	Intragenic	Sense
NC_016856.1_305184	305184	-	gene	304967	305043	+	STM14_0311	-141	Intergenic	Antisense
NC_016856.1_305187	305187	-	gene	304967	305043	+	STM14_0311	-144	Intergenic	Antisense
NC_016856.1_306857	306857	+	gene	306431	307426	-	STM14_0314	0	Intragenic	Antisense
NC_016856.1_309302	309302	-	gene	307423	309306	-	STM14_0315	0	Intragenic	Sense
NC_016856.1_311336	311336	-	gene	310624	311526	-	STM14_0318	0	Intragenic	Sense
NC_016856.1_311518	311518	-	gene	310624	311526	-	STM14_0318	0	Intragenic	Sense
NC_016856.1_314645	314645	+	gene	314633	315175	+	STM14_0320	0	Intragenic	Sense
NC_016856.1_315084	315084	+	gene	314633	315175	+	STM14_0320	0	Intragenic	Sense
NC_016856.1_315537	315537	-	gene	315199	316692	+	STM14_0321	0	Intragenic	Antisense
NC_016856.1_315584	315584	+	gene	315199	316692	+	STM14_0321	0	Intragenic	Sense
NC_016856.1_316484	316484	+	gene	315199	316692	+	STM14_0321	0	Intragenic	Sense
NC_016856.1_317863	317863	-	gene	317578	318063	+	STM14_0324	0	Intragenic	Antisense
NC_016856.1_320446	320446	-	gene	319916	320452	+	STM14_0328	0	Intragenic	Antisense
NC_016856.1_320609	320609	+	gene	320456	321799	+	STM14_0329	0	Intragenic	Sense
NC_016856.1_327401	327401	+	gene	324546	328415	+	STM14_0333	0	Intragenic	Sense
NC_016856.1_329419	329419	-	gene	329200	329616	+	STM14_0335	0	Intragenic	Antisense
NC_016856.1_329634	329634	+	gene	329640	330161	+	STM14_0336	6	Intergenic	Sense
NC_016856.1_331229	331229	+	gene	330558	332747	+	STM14_0338	0	Intragenic	Sense
NC_016856.1_332445	332445	+	gene	330558	332747	+	STM14_0338	0	Intragenic	Sense
NC_016856.1_332772	332772	-	gene	332771	333217	+	STM14_0339	0	Intragenic	Antisense
NC_016856.1_332836	332836	-	gene	332771	333217	+	STM14_0339	0	Intragenic	Antisense
NC_016856.1_333539	333539	-	gene	333236	337330	+	STM14_0340	0	Intragenic	Antisense
NC_016856.1_336866	336866	-	gene	333236	337330	+	STM14_0340	0	Intragenic	Antisense
NC_016856.1_336869	336869	+	gene	333236	337330	+	STM14_0340	0	Intragenic	Sense
NC_016856.1_336884	336884	+	gene	333236	337330	+	STM14_0340	0	Intragenic	Sense
NC_016856.1_336938	336938	-	gene	333236	337330	+	STM14_0340	0	Intragenic	Antisense
NC_016856.1_337411	337411	+	gene	337324	337587	+	STM14_RS02050	0	Intragenic	Sense
NC_016856.1_337420	337420	+	gene	337324	337587	+	STM14_RS02050	0	Intragenic	Sense
NC_016856.1_337476	337476	+	gene	337324	337587	+	STM14_RS02050	0	Intragenic	Sense
NC_016856.1_337586	337586	+	gene	337324	337587	+	STM14_RS02050	0	Intragenic	Sense
NC_016856.1_338071	338071	-	gene	337780	338520	+	STM14_0341	0	Intragenic	Antisense
NC_016856.1_338074	338074	+	gene	337780	338520	+	STM14_0341	0	Intragenic	Sense
NC_016856.1_338089	338089	+	gene	337780	338520	+	STM14_0341	0	Intragenic	Sense
NC_016856.1_338207	338207	+	gene	337780	338520	+	STM14_0341	0	Intragenic	Sense
NC_016856.1_338465	338465	+	gene	337780	338520	+	STM14_0341	0	Intragenic	Sense
NC_016856.1_338467	338467	+	gene	337780	338520	+	STM14_0341	0	Intragenic	Sense
NC_016856.1_338477	338477	+	gene	337780	338520	+	STM14_0341	0	Intragenic	Sense
NC_016856.1_338928	338928	+	gene	338514	338960	+	STM14_0342	0	Intragenic	Sense
NC_016856.1_340479	340479	+	pseudogene	340416	340646	+	STM14_0347	0	Intragenic	Sense
NC_016856.1_340494	340494	+	pseudogene	340416	340646	+	STM14_0347	0	Intragenic	Sense
NC_016856.1_340822	340822	+	gene	340729	341037	+	STM14_0348	0	Intragenic	Sense
NC_016856.1_341421	341421	+	gene	341440	341637	+	STM14_0350	19	Intergenic	Sense
NC_016856.1_343139	343139	+	gene	342894	343406	+	STM14_0352	0	Intragenic	Sense
NC_016856.1_343218	343218	+	gene	342894	343406	+	STM14_0352	0	Intragenic	Sense
NC_016856.1_343337	343337	+	gene	342894	343406	+	STM14_0352	0	Intragenic	Sense
NC_016856.1_343398	343398	-	gene	342894	343406	+	STM14_0352	0	Intragenic	Antisense
NC_016856.1_344791	344791	+	gene	344251	346761	+	STM14_0354	0	Intragenic	Sense
NC_016856.1_345938	345938	-	gene	344251	346761	+	STM14_0354	0	Intragenic	Antisense
NC_016856.1_345985	345985	+	gene	344251	346761	+	STM14_0354	0	Intragenic	Sense
NC_016856.1_346625	346625	+	gene	344251	346761	+	STM14_0354	0	Intragenic	Sense
NC_016856.1_347322	347322	-	gene	346783	347253	+	STM14_0355	-69	Intergenic	Antisense
NC_016856.1_348004	348004	+	gene	347659	348480	+	STM14_0356	0	Intragenic	Sense
NC_016856.1_349112	349112	+	gene	349295	350242	+	STM14_0358	183	Intergenic	Sense
NC_016856.1_349211	349211	+	gene	349295	350242	+	STM14_0358	84	Intergenic	Sense
NC_016856.1_349322	349322	+	gene	349295	350242	+	STM14_0358	0	Intragenic	Sense
NC_016856.1_349934	349934	-	gene	349295	350242	+	STM14_0358	0	Intragenic	Antisense
NC_016856.1_350898	350898	-	gene	350578	351297	-	STM14_0360	0	Intragenic	Sense
NC_016856.1_351041	351041	+	gene	350578	351297	-	STM14_0360	0	Intragenic	Antisense
NC_016856.1_351366	351366	+	gene	350578	351297	-	STM14_0360	-69	Intergenic	Antisense
NC_016856.1_351467	351467	+	gene	351628	352035	-	STM14_0362	161	Intergenic	Antisense
NC_016856.1_351543	351543	+	gene	351628	352035	-	STM14_0362	85	Intergenic	Antisense
NC_016856.1_351905	351905	+	gene	351628	352035	-	STM14_0362	0	Intragenic	Antisense
NC_016856.1_352115	352115	-	gene	351628	352035	-	STM14_0362	-80	Intergenic	Sense
NC_016856.1_353199	353199	-	gene	352406	353173	-	STM14_0364	-26	Intergenic	Sense
NC_016856.1_353213	353213	-	gene	352406	353173	-	STM14_0364	-40	Intergenic	Sense
NC_016856.1_353232	353232	+	gene	353282	355726	-	STM14_0365	50	Intergenic	Antisense
NC_016856.1_353354	353354	-	gene	353282	355726	-	STM14_0365	0	Intragenic	Sense
NC_016856.1_353481	353481	-	gene	353282	355726	-	STM14_0365	0	Intragenic	Sense
NC_016856.1_353492	353492	-	gene	353282	355726	-	STM14_0365	0	Intragenic	Sense
NC_016856.1_353994	353994	-	gene	353282	355726	-	STM14_0365	0	Intragenic	Sense
NC_016856.1_354403	354403	-	gene	353282	355726	-	STM14_0365	0	Intragenic	Sense
NC_016856.1_354647	354647	-	gene	353282	355726	-	STM14_0365	0	Intragenic	Sense
NC_016856.1_354685	354685	+	gene	353282	355726	-	STM14_0365	0	Intragenic	Antisense
NC_016856.1_355219	355219	-	gene	353282	355726	-	STM14_0365	0	Intragenic	Sense
NC_016856.1_355700	355700	-	gene	353282	355726	-	STM14_0365	0	Intragenic	Sense
NC_016856.1_355715	355715	-	gene	353282	355726	-	STM14_0365	0	Intragenic	Sense
NC_016856.1_355770	355770	-	gene	353282	355726	-	STM14_0365	-44	Intergenic	Sense
NC_016856.1_355908	355908	+	gene	355966	356544	+	STM14_0366	58	Intergenic	Sense
NC_016856.1_355935	355935	+	gene	355966	356544	+	STM14_0366	31	Intergenic	Sense
NC_016856.1_355942	355942	+	gene	355966	356544	+	STM14_0366	24	Intergenic	Sense
NC_016856.1_355985	355985	+	gene	355966	356544	+	STM14_0366	0	Intragenic	Sense
NC_016856.1_356240	356240	+	gene	355966	356544	+	STM14_0366	0	Intragenic	Sense
NC_016856.1_356487	356487	-	gene	355966	356544	+	STM14_0366	0	Intragenic	Antisense
NC_016856.1_356498	356498	-	gene	355966	356544	+	STM14_0366	0	Intragenic	Antisense
NC_016856.1_356516	356516	+	gene	355966	356544	+	STM14_0366	0	Intragenic	Sense
NC_016856.1_356537	356537	-	gene	355966	356544	+	STM14_0366	0	Intragenic	Antisense
NC_016856.1_356549	356549	+	gene	355966	356544	+	STM14_0366	-5	Intergenic	Sense
NC_016856.1_356660	356660	-	gene	356757	357524	+	STM14_0367	97	Intergenic	Antisense
NC_016856.1_356688	356688	+	gene	356757	357524	+	STM14_0367	69	Intergenic	Sense
NC_016856.1_356714	356714	+	gene	356757	357524	+	STM14_0367	43	Intergenic	Sense
NC_016856.1_357529	357529	+	gene	357495	358235	-	STM14_0368	0	Intragenic	Antisense
NC_016856.1_357620	357620	-	gene	357495	358235	-	STM14_0368	0	Intragenic	Sense
NC_016856.1_357844	357844	-	gene	357495	358235	-	STM14_0368	0	Intragenic	Sense
NC_016856.1_358314	358314	-	gene	357495	358235	-	STM14_0368	-79	Intergenic	Sense
NC_016856.1_358354	358354	-	gene	357495	358235	-	STM14_0368	-119	Intergenic	Sense
NC_016856.1_358362	358362	-	gene	358485	359540	+	STM14_0369	123	Intergenic	Antisense
NC_016856.1_358394	358394	-	gene	358485	359540	+	STM14_0369	91	Intergenic	Antisense
NC_016856.1_358467	358467	+	gene	358485	359540	+	STM14_0369	18	Intergenic	Sense
NC_016856.1_358506	358506	+	gene	358485	359540	+	STM14_0369	0	Intragenic	Sense
NC_016856.1_358773	358773	+	gene	358485	359540	+	STM14_0369	0	Intragenic	Sense
NC_016856.1_359608	359608	+	gene	358485	359540	+	STM14_0369	-68	Intergenic	Sense
NC_016856.1_359838	359838	-	pseudogene	359759	360891	+	STM14_0370	0	Intragenic	Antisense
NC_016856.1_360038	360038	+	pseudogene	359759	360891	+	STM14_0370	0	Intragenic	Sense
NC_016856.1_360790	360790	+	pseudogene	359759	360891	+	STM14_0370	0	Intragenic	Sense
NC_016856.1_362248	362248	-	gene	361658	363115	-	STM14_0372	0	Intragenic	Sense
NC_016856.1_362828	362828	+	gene	361658	363115	-	STM14_0372	0	Intragenic	Antisense
NC_016856.1_363193	363193	-	gene	361658	363115	-	STM14_0372	-78	Intergenic	Sense
NC_016856.1_363221	363221	-	gene	361658	363115	-	STM14_0372	-106	Intergenic	Sense
NC_016856.1_363242	363242	+	gene	363364	363822	+	STM14_0373	122	Intergenic	Sense
NC_016856.1_363306	363306	+	gene	363364	363822	+	STM14_0373	58	Intergenic	Sense
NC_016856.1_363562	363562	+	gene	363364	363822	+	STM14_0373	0	Intragenic	Sense
NC_016856.1_363886	363886	+	gene	363911	365155	+	STM14_0374	25	Intergenic	Sense
NC_016856.1_364049	364049	-	gene	363911	365155	+	STM14_0374	0	Intragenic	Antisense
NC_016856.1_364178	364178	+	gene	363911	365155	+	STM14_0374	0	Intragenic	Sense
NC_016856.1_364907	364907	+	gene	363911	365155	+	STM14_0374	0	Intragenic	Sense
NC_016856.1_365137	365137	-	gene	363911	365155	+	STM14_0374	0	Intragenic	Antisense
NC_016856.1_365194	365194	+	gene	365213	365614	+	STM14_0375	19	Intergenic	Sense
NC_016856.1_365210	365210	+	gene	365213	365614	+	STM14_0375	3	Intergenic	Sense
NC_016856.1_365700	365700	-	gene	365665	366717	-	STM14_0376	0	Intragenic	Sense
NC_016856.1_366573	366573	-	gene	365665	366717	-	STM14_0376	0	Intragenic	Sense
NC_016856.1_366585	366585	-	gene	365665	366717	-	STM14_0376	0	Intragenic	Sense
NC_016856.1_366756	366756	+	gene	365665	366717	-	STM14_0376	-39	Intergenic	Antisense
NC_016856.1_366963	366963	+	gene	367000	368103	+	STM14_0378	37	Intergenic	Sense
NC_016856.1_367006	367006	+	gene	367000	368103	+	STM14_0378	0	Intragenic	Sense
NC_016856.1_369477	369477	-	gene	369481	369556	+	STM14_0380	4	Intergenic	Antisense
NC_016856.1_369481	369481	+	gene	369481	369556	+	STM14_0380	0	Intragenic	Sense
NC_016856.1_369720	369720	+	pseudogene	369819	370598	-	STM14_0381	99	Intergenic	Antisense
NC_016856.1_369721	369721	+	pseudogene	369819	370598	-	STM14_0381	98	Intergenic	Antisense
NC_016856.1_369749	369749	-	pseudogene	369819	370598	-	STM14_0381	70	Intergenic	Sense
NC_016856.1_369784	369784	-	pseudogene	369819	370598	-	STM14_0381	35	Intergenic	Sense
NC_016856.1_369815	369815	+	pseudogene	369819	370598	-	STM14_0381	4	Intergenic	Antisense
NC_016856.1_369880	369880	-	pseudogene	369819	370598	-	STM14_0381	0	Intragenic	Sense
NC_016856.1_371395	371395	-	gene	371424	371747	+	STM14_0383	29	Intergenic	Antisense
NC_016856.1_371413	371413	+	gene	371424	371747	+	STM14_0383	11	Intergenic	Sense
NC_016856.1_371954	371954	-	gene	372088	373326	+	STM14_0384	134	Intergenic	Antisense
NC_016856.1_372037	372037	+	gene	372088	373326	+	STM14_0384	51	Intergenic	Sense
NC_016856.1_372497	372497	-	gene	372088	373326	+	STM14_0384	0	Intragenic	Antisense
NC_016856.1_373643	373643	-	gene	373458	374879	+	STM14_0385	0	Intragenic	Antisense
NC_016856.1_374202	374202	+	gene	373458	374879	+	STM14_0385	0	Intragenic	Sense
NC_016856.1_375288	375288	-	gene	374881	375507	+	STM14_0386	0	Intragenic	Antisense
NC_016856.1_376116	376116	+	gene	375522	376400	+	STM14_0387	0	Intragenic	Sense
NC_016856.1_376162	376162	-	gene	375522	376400	+	STM14_0387	0	Intragenic	Antisense
NC_016856.1_376591	376591	-	gene	376400	377314	+	STM14_0388	0	Intragenic	Antisense
NC_016856.1_376754	376754	+	gene	376400	377314	+	STM14_0388	0	Intragenic	Sense
NC_016856.1_376986	376986	+	gene	376400	377314	+	STM14_0388	0	Intragenic	Sense
NC_016856.1_377053	377053	+	gene	376400	377314	+	STM14_0388	0	Intragenic	Sense
NC_016856.1_377298	377298	-	gene	376400	377314	+	STM14_0388	0	Intragenic	Antisense
NC_016856.1_377322	377322	+	gene	376400	377314	+	STM14_0388	-8	Intergenic	Sense
NC_016856.1_377491	377491	-	gene	377348	378313	+	STM14_0389	0	Intragenic	Antisense
NC_016856.1_377759	377759	+	gene	377348	378313	+	STM14_0389	0	Intragenic	Sense
NC_016856.1_377851	377851	+	gene	377348	378313	+	STM14_0389	0	Intragenic	Sense
NC_016856.1_378669	378669	-	gene	378258	378530	-	STM14_0390	-139	Intergenic	Sense
NC_016856.1_379120	379120	+	gene	379221	379619	+	STM14_0391	101	Intergenic	Sense
NC_016856.1_380271	380271	+	gene	379666	380424	-	STM14_0392	0	Intragenic	Antisense
NC_016856.1_380331	380331	-	gene	379666	380424	-	STM14_0392	0	Intragenic	Sense
NC_016856.1_380392	380392	+	gene	379666	380424	-	STM14_0392	0	Intragenic	Antisense
NC_016856.1_380392	380392	+	gene	380390	381715	-	STM14_0393	0	Intragenic	Antisense
NC_016856.1_381191	381191	+	gene	380390	381715	-	STM14_0393	0	Intragenic	Antisense
NC_016856.1_382345	382345	-	gene	381720	384287	-	STM14_0394	0	Intragenic	Sense
NC_016856.1_382362	382362	+	gene	381720	384287	-	STM14_0394	0	Intragenic	Antisense
NC_016856.1_382554	382554	-	gene	381720	384287	-	STM14_0394	0	Intragenic	Sense
NC_016856.1_383617	383617	-	gene	381720	384287	-	STM14_0394	0	Intragenic	Sense
NC_016856.1_385647	385647	+	gene	385094	385630	-	STM14_0396	-17	Intergenic	Antisense
NC_016856.1_386217	386217	+	gene	386264	387028	+	STM14_0398	47	Intergenic	Sense
NC_016856.1_386262	386262	+	gene	386264	387028	+	STM14_0398	2	Intergenic	Sense
NC_016856.1_387342	387342	+	gene	387298	387501	+	STM14_RS25870	0	Intragenic	Sense
NC_016856.1_388757	388757	+	gene	387801	389375	+	STM14_0400	0	Intragenic	Sense
NC_016856.1_388811	388811	+	gene	387801	389375	+	STM14_0400	0	Intragenic	Sense
NC_016856.1_389436	389436	+	gene	389475	390218	+	STM14_0401	39	Intergenic	Sense
NC_016856.1_389523	389523	+	gene	389475	390218	+	STM14_0401	0	Intragenic	Sense
NC_016856.1_389727	389727	+	gene	389475	390218	+	STM14_0401	0	Intragenic	Sense
NC_016856.1_389867	389867	-	gene	389475	390218	+	STM14_0401	0	Intragenic	Antisense
NC_016856.1_390376	390376	-	gene	390191	390679	+	STM14_0402	0	Intragenic	Antisense
NC_016856.1_392545	392545	-	gene	392401	392625	+	STM14_0406	0	Intragenic	Antisense
NC_016856.1_392604	392604	-	gene	392401	392625	+	STM14_0406	0	Intragenic	Antisense
NC_016856.1_392691	392691	+	gene	392683	393042	+	STM14_0407	0	Intragenic	Sense
NC_016856.1_396526	396526	-	gene	394586	397753	-	STM14_0409	0	Intragenic	Sense
NC_016856.1_396773	396773	+	gene	394586	397753	-	STM14_0409	0	Intragenic	Antisense
NC_016856.1_399225	399225	+	gene	399253	401541	+	STM14_0412	28	Intergenic	Sense
NC_016856.1_400567	400567	+	gene	399253	401541	+	STM14_0412	0	Intragenic	Sense
NC_016856.1_400801	400801	+	gene	399253	401541	+	STM14_0412	0	Intragenic	Sense
NC_016856.1_401427	401427	+	gene	399253	401541	+	STM14_0412	0	Intragenic	Sense
NC_016856.1_402407	402407	-	gene	402095	402289	+	STM14_0414	-118	Intergenic	Antisense
NC_016856.1_402454	402454	+	gene	402582	403835	+	STM14_0416	128	Intergenic	Sense
NC_016856.1_402469	402469	+	gene	402582	403835	+	STM14_0416	113	Intergenic	Sense
NC_016856.1_403371	403371	+	gene	402582	403835	+	STM14_0416	0	Intragenic	Sense
NC_016856.1_403915	403915	-	gene	402582	403835	+	STM14_0416	-80	Intergenic	Antisense
NC_016856.1_405737	405737	+	gene	404024	405982	+	STM14_0417	0	Intragenic	Sense
NC_016856.1_405982	405982	+	gene	404024	405982	+	STM14_0417	0	Intragenic	Sense
NC_016856.1_406673	406673	-	gene	405992	408964	+	STM14_0418	0	Intragenic	Antisense
NC_016856.1_406712	406712	+	gene	405992	408964	+	STM14_0418	0	Intragenic	Sense
NC_016856.1_406984	406984	+	gene	405992	408964	+	STM14_0418	0	Intragenic	Sense
NC_016856.1_408032	408032	-	gene	405992	408964	+	STM14_0418	0	Intragenic	Antisense
NC_016856.1_409112	409112	-	gene	409241	409342	+	STM14_0421	129	Intergenic	Antisense
NC_016856.1_409252	409252	+	gene	409241	409342	+	STM14_0421	0	Intragenic	Sense
NC_016856.1_409413	409413	-	gene	409459	410862	+	STM14_0422	46	Intergenic	Antisense
NC_016856.1_410392	410392	+	gene	409459	410862	+	STM14_0422	0	Intragenic	Sense
NC_016856.1_410904	410904	+	gene	410859	411869	+	STM14_0423	0	Intragenic	Sense
NC_016856.1_410988	410988	+	gene	410859	411869	+	STM14_0423	0	Intragenic	Sense
NC_016856.1_412164	412164	+	gene	412206	413210	+	STM14_0425	42	Intergenic	Sense
NC_016856.1_412192	412192	+	gene	412206	413210	+	STM14_0425	14	Intergenic	Sense
NC_016856.1_412361	412361	-	gene	412206	413210	+	STM14_0425	0	Intragenic	Antisense
NC_016856.1_412432	412432	+	gene	412206	413210	+	STM14_0425	0	Intragenic	Sense
NC_016856.1_413540	413540	-	gene	413374	415464	+	STM14_0426	0	Intragenic	Antisense
NC_016856.1_414504	414504	-	gene	413374	415464	+	STM14_0426	0	Intragenic	Antisense
NC_016856.1_414584	414584	+	gene	413374	415464	+	STM14_0426	0	Intragenic	Sense
NC_016856.1_414798	414798	-	gene	413374	415464	+	STM14_0426	0	Intragenic	Antisense
NC_016856.1_415189	415189	+	gene	413374	415464	+	STM14_0426	0	Intragenic	Sense
NC_016856.1_415308	415308	+	gene	413374	415464	+	STM14_0426	0	Intragenic	Sense
NC_016856.1_416079	416079	-	gene	415505	416137	-	STM14_0427	0	Intragenic	Sense
NC_016856.1_416153	416153	-	gene	415505	416137	-	STM14_0427	-16	Intergenic	Sense
NC_016856.1_416166	416166	-	gene	415505	416137	-	STM14_0427	-29	Intergenic	Sense
NC_016856.1_416168	416168	-	gene	415505	416137	-	STM14_0427	-31	Intergenic	Sense
NC_016856.1_416304	416304	+	gene	416369	416644	+	STM14_0428	65	Intergenic	Sense
NC_016856.1_416340	416340	-	gene	416369	416644	+	STM14_0428	29	Intergenic	Antisense
NC_016856.1_416446	416446	+	gene	416369	416644	+	STM14_0428	0	Intragenic	Sense
NC_016856.1_416610	416610	-	gene	416369	416644	+	STM14_0428	0	Intragenic	Antisense
NC_016856.1_417263	417263	-	gene	416780	418405	-	STM14_0429	0	Intragenic	Sense
NC_016856.1_417592	417592	+	gene	416780	418405	-	STM14_0429	0	Intragenic	Antisense
NC_016856.1_418366	418366	-	gene	416780	418405	-	STM14_0429	0	Intragenic	Sense
NC_016856.1_418433	418433	-	gene	416780	418405	-	STM14_0429	-28	Intergenic	Sense
NC_016856.1_418544	418544	+	gene	418670	419557	+	STM14_0431	126	Intergenic	Sense
NC_016856.1_418634	418634	+	gene	418670	419557	+	STM14_0431	36	Intergenic	Sense
NC_016856.1_418797	418797	+	gene	418670	419557	+	STM14_0431	0	Intragenic	Sense
NC_016856.1_419647	419647	-	gene	419680	420849	+	STM14_0432	33	Intergenic	Antisense
NC_016856.1_419670	419670	-	gene	419680	420849	+	STM14_0432	10	Intergenic	Antisense
NC_016856.1_419671	419671	+	gene	419680	420849	+	STM14_0432	9	Intergenic	Sense
NC_016856.1_420858	420858	-	gene	419680	420849	+	STM14_0432	-9	Intergenic	Antisense
NC_016856.1_422389	422389	-	gene	422381	424267	+	STM14_0434	0	Intragenic	Antisense
NC_016856.1_423301	423301	+	gene	422381	424267	+	STM14_0434	0	Intragenic	Sense
NC_016856.1_424253	424253	+	gene	422381	424267	+	STM14_0434	0	Intragenic	Sense
NC_016856.1_424382	424382	-	gene	424371	425345	-	STM14_0435	0	Intragenic	Sense
NC_016856.1_425371	425371	-	gene	424371	425345	-	STM14_0435	-26	Intergenic	Sense
NC_016856.1_426281	426281	+	gene	425858	428794	+	STM14_0438	0	Intragenic	Sense
NC_016856.1_426552	426552	+	gene	425858	428794	+	STM14_0438	0	Intragenic	Sense
NC_016856.1_426630	426630	+	gene	425858	428794	+	STM14_0438	0	Intragenic	Sense
NC_016856.1_426634	426634	-	gene	425858	428794	+	STM14_0438	0	Intragenic	Antisense
NC_016856.1_426653	426653	+	gene	425858	428794	+	STM14_0438	0	Intragenic	Sense
NC_016856.1_426956	426956	+	gene	425858	428794	+	STM14_0438	0	Intragenic	Sense
NC_016856.1_427016	427016	+	gene	425858	428794	+	STM14_0438	0	Intragenic	Sense
NC_016856.1_427061	427061	+	gene	425858	428794	+	STM14_0438	0	Intragenic	Sense
NC_016856.1_427318	427318	+	gene	425858	428794	+	STM14_0438	0	Intragenic	Sense
NC_016856.1_427367	427367	+	gene	425858	428794	+	STM14_0438	0	Intragenic	Sense
NC_016856.1_427529	427529	+	gene	425858	428794	+	STM14_0438	0	Intragenic	Sense
NC_016856.1_427532	427532	+	gene	425858	428794	+	STM14_0438	0	Intragenic	Sense
NC_016856.1_427910	427910	+	gene	425858	428794	+	STM14_0438	0	Intragenic	Sense
NC_016856.1_428288	428288	+	gene	425858	428794	+	STM14_0438	0	Intragenic	Sense
NC_016856.1_428318	428318	+	gene	425858	428794	+	STM14_0438	0	Intragenic	Sense
NC_016856.1_428391	428391	+	gene	425858	428794	+	STM14_0438	0	Intragenic	Sense
NC_016856.1_428392	428392	+	gene	425858	428794	+	STM14_0438	0	Intragenic	Sense
NC_016856.1_428896	428896	+	gene	428880	429503	+	STM14_0439	0	Intragenic	Sense
NC_016856.1_428934	428934	-	gene	428880	429503	+	STM14_0439	0	Intragenic	Antisense
NC_016856.1_428966	428966	-	gene	428880	429503	+	STM14_0439	0	Intragenic	Antisense
NC_016856.1_429010	429010	-	gene	428880	429503	+	STM14_0439	0	Intragenic	Antisense
NC_016856.1_429888	429888	+	gene	429548	430705	-	STM14_0440	0	Intragenic	Antisense
NC_016856.1_430737	430737	-	gene	430751	430954	-	STM14_0441	14	Intergenic	Sense
NC_016856.1_430872	430872	+	gene	430751	430954	-	STM14_0441	0	Intragenic	Antisense
NC_016856.1_431443	431443	-	gene	431052	432272	+	STM14_0443	0	Intragenic	Antisense
NC_016856.1_431988	431988	-	gene	431052	432272	+	STM14_0443	0	Intragenic	Antisense
NC_016856.1_432098	432098	+	gene	431052	432272	+	STM14_0443	0	Intragenic	Sense
NC_016856.1_432205	432205	+	gene	431052	432272	+	STM14_0443	0	Intragenic	Sense
NC_016856.1_433776	433776	-	gene	433419	433727	-	STM14_0445	-49	Intergenic	Sense
NC_016856.1_433964	433964	+	gene	433995	434210	+	STM14_0447	31	Intergenic	Sense
NC_016856.1_434066	434066	+	gene	433995	434210	+	STM14_0447	0	Intragenic	Sense
NC_016856.1_434553	434553	+	gene	434236	435330	-	STM14_0448	0	Intragenic	Antisense
NC_016856.1_435322	435322	-	gene	434236	435330	-	STM14_0448	0	Intragenic	Sense
NC_016856.1_435358	435358	-	gene	434236	435330	-	STM14_0448	-28	Intergenic	Sense
NC_016856.1_435416	435416	+	gene	435408	436121	+	STM14_0449	0	Intragenic	Sense
NC_016856.1_435507	435507	-	gene	435408	436121	+	STM14_0449	0	Intragenic	Antisense
NC_016856.1_436023	436023	+	gene	435408	436121	+	STM14_0449	0	Intragenic	Sense
NC_016856.1_436041	436041	+	gene	435408	436121	+	STM14_0449	0	Intragenic	Sense
NC_016856.1_437568	437568	+	gene	436290	437501	+	STM14_0450	-67	Intergenic	Sense
NC_016856.1_437603	437603	+	gene	436290	437501	+	STM14_0450	-102	Intergenic	Sense
NC_016856.1_437622	437622	+	gene	436290	437501	+	STM14_0450	-121	Intergenic	Sense
NC_016856.1_437648	437648	+	gene	437792	438058	+	STM14_0452	144	Intergenic	Sense
NC_016856.1_437713	437713	-	gene	437792	438058	+	STM14_0452	79	Intergenic	Antisense
NC_016856.1_437775	437775	+	gene	437792	438058	+	STM14_0452	17	Intergenic	Sense
NC_016856.1_437776	437776	+	gene	437792	438058	+	STM14_0452	16	Intergenic	Sense
NC_016856.1_437933	437933	+	gene	437792	438058	+	STM14_0452	0	Intragenic	Sense
NC_016856.1_438156	438156	+	gene	437792	438058	+	STM14_0452	-98	Intergenic	Sense
NC_016856.1_438161	438161	+	gene	437792	438058	+	STM14_0452	-103	Intergenic	Sense
NC_016856.1_438180	438180	+	gene	437792	438058	+	STM14_0452	-122	Intergenic	Sense
NC_016856.1_438226	438226	-	gene	437792	438058	+	STM14_0452	-168	Intergenic	Antisense
NC_016856.1_438258	438258	-	gene	438410	438730	+	STM14_0454	152	Intergenic	Antisense
NC_016856.1_438345	438345	+	gene	438410	438730	+	STM14_0454	65	Intergenic	Sense
NC_016856.1_438399	438399	+	gene	438410	438730	+	STM14_0454	11	Intergenic	Sense
NC_016856.1_438808	438808	+	gene	438822	439934	+	STM14_0455	14	Intergenic	Sense
NC_016856.1_439214	439214	+	gene	438822	439934	+	STM14_0455	0	Intragenic	Sense
NC_016856.1_440110	440110	-	gene	439949	440758	-	STM14_0456	0	Intragenic	Sense
NC_016856.1_440525	440525	-	gene	439949	440758	-	STM14_0456	0	Intragenic	Sense
NC_016856.1_440795	440795	+	gene	439949	440758	-	STM14_0456	-37	Intergenic	Antisense
NC_016856.1_440868	440868	-	gene	440898	441353	+	STM14_0458	30	Intergenic	Antisense
NC_016856.1_440875	440875	+	gene	440898	441353	+	STM14_0458	23	Intergenic	Sense
NC_016856.1_440879	440879	+	gene	440898	441353	+	STM14_0458	19	Intergenic	Sense
NC_016856.1_441411	441411	+	gene	440898	441353	+	STM14_0458	-58	Intergenic	Sense
NC_016856.1_441487	441487	+	gene	441538	442083	+	STM14_0459	51	Intergenic	Sense
NC_016856.1_442021	442021	-	gene	441538	442083	+	STM14_0459	0	Intragenic	Antisense
NC_016856.1_442087	442087	+	gene	441538	442083	+	STM14_0459	-4	Intergenic	Sense
NC_016856.1_442287	442287	-	gene	442110	442301	+	STM14_0460	0	Intragenic	Antisense
NC_016856.1_442334	442334	-	gene	442110	442301	+	STM14_0460	-33	Intergenic	Antisense
NC_016856.1_442421	442421	+	gene	442110	442301	+	STM14_0460	-120	Intergenic	Sense
NC_016856.1_442474	442474	+	gene	442552	443229	+	STM14_0461	78	Intergenic	Sense
NC_016856.1_442548	442548	+	gene	442552	443229	+	STM14_0461	4	Intergenic	Sense
NC_016856.1_442641	442641	-	gene	442552	443229	+	STM14_0461	0	Intragenic	Antisense
NC_016856.1_442824	442824	-	gene	442552	443229	+	STM14_0461	0	Intragenic	Antisense
NC_016856.1_442834	442834	+	gene	442552	443229	+	STM14_0461	0	Intragenic	Sense
NC_016856.1_442875	442875	-	gene	442552	443229	+	STM14_0461	0	Intragenic	Antisense
NC_016856.1_443273	443273	+	gene	443300	443584	+	STM14_0462	27	Intergenic	Sense
NC_016856.1_443284	443284	+	gene	443300	443584	+	STM14_0462	16	Intergenic	Sense
NC_016856.1_444498	444498	+	gene	443622	444533	-	STM14_0463	0	Intragenic	Antisense
NC_016856.1_444564	444564	-	gene	443622	444533	-	STM14_0463	-31	Intergenic	Sense
NC_016856.1_444568	444568	+	gene	443622	444533	-	STM14_0463	-35	Intergenic	Antisense
NC_016856.1_444569	444569	+	gene	443622	444533	-	STM14_0463	-36	Intergenic	Antisense
NC_016856.1_444634	444634	+	gene	444659	445567	+	STM14_0465	25	Intergenic	Sense
NC_016856.1_446877	446877	-	gene	446934	450074	-	STM14_0467	57	Intergenic	Sense
NC_016856.1_446902	446902	+	gene	446934	450074	-	STM14_0467	32	Intergenic	Antisense
NC_016856.1_448126	448126	+	gene	446934	450074	-	STM14_0467	0	Intragenic	Antisense
NC_016856.1_449700	449700	+	gene	446934	450074	-	STM14_0467	0	Intragenic	Antisense
NC_016856.1_451297	451297	-	gene	450071	451273	-	STM14_0468	-24	Intergenic	Sense
NC_016856.1_451445	451445	+	gene	451488	452177	+	STM14_0470	43	Intergenic	Sense
NC_016856.1_451456	451456	+	gene	451488	452177	+	STM14_0470	32	Intergenic	Sense
NC_016856.1_451494	451494	+	gene	451488	452177	+	STM14_0470	0	Intragenic	Sense
NC_016856.1_451596	451596	+	gene	451488	452177	+	STM14_0470	0	Intragenic	Sense
NC_016856.1_451683	451683	+	gene	451488	452177	+	STM14_0470	0	Intragenic	Sense
NC_016856.1_451739	451739	+	gene	451488	452177	+	STM14_0470	0	Intragenic	Sense
NC_016856.1_453078	453078	+	gene	452247	453542	+	STM14_0471	0	Intragenic	Sense
NC_016856.1_453779	453779	+	gene	453951	455270	+	STM14_0473	172	Intergenic	Sense
NC_016856.1_454044	454044	+	gene	453951	455270	+	STM14_0473	0	Intragenic	Sense
NC_016856.1_455056	455056	+	gene	453951	455270	+	STM14_0473	0	Intragenic	Sense
NC_016856.1_455109	455109	+	gene	453951	455270	+	STM14_0473	0	Intragenic	Sense
NC_016856.1_455370	455370	+	gene	455345	456715	+	STM14_0474	0	Intragenic	Sense
NC_016856.1_456072	456072	-	gene	455345	456715	+	STM14_0474	0	Intragenic	Antisense
NC_016856.1_456344	456344	+	gene	455345	456715	+	STM14_0474	0	Intragenic	Sense
NC_016856.1_456617	456617	+	gene	455345	456715	+	STM14_0474	0	Intragenic	Sense
NC_016856.1_457315	457315	-	gene	456877	458694	+	STM14_0475	0	Intragenic	Antisense
NC_016856.1_458104	458104	+	gene	456877	458694	+	STM14_0475	0	Intragenic	Sense
NC_016856.1_458323	458323	+	gene	456877	458694	+	STM14_0475	0	Intragenic	Sense
NC_016856.1_459407	459407	-	gene	458766	459368	-	STM14_0476	-39	Intergenic	Sense
NC_016856.1_459483	459483	-	gene	459578	460159	-	STM14_0477	95	Intergenic	Sense
NC_016856.1_459658	459658	-	gene	459578	460159	-	STM14_0477	0	Intragenic	Sense
NC_016856.1_461297	461297	+	gene	460253	461317	+	STM14_0478	0	Intragenic	Sense
NC_016856.1_461392	461392	+	gene	461304	461450	+	STM14_0479	0	Intragenic	Sense
NC_016856.1_461523	461523	+	gene	461514	462641	+	STM14_0480	0	Intragenic	Sense
NC_016856.1_461634	461634	+	gene	461514	462641	+	STM14_0480	0	Intragenic	Sense
NC_016856.1_461919	461919	+	gene	461514	462641	+	STM14_0480	0	Intragenic	Sense
NC_016856.1_461985	461985	+	gene	461514	462641	+	STM14_0480	0	Intragenic	Sense
NC_016856.1_462492	462492	+	gene	461514	462641	+	STM14_0480	0	Intragenic	Sense
NC_016856.1_462635	462635	-	gene	461514	462641	+	STM14_0480	0	Intragenic	Antisense
NC_016856.1_463041	463041	+	gene	463024	464871	+	STM14_0482	0	Intragenic	Sense
NC_016856.1_464426	464426	-	gene	463024	464871	+	STM14_0482	0	Intragenic	Antisense
NC_016856.1_464437	464437	-	gene	463024	464871	+	STM14_0482	0	Intragenic	Antisense
NC_016856.1_464832	464832	+	gene	463024	464871	+	STM14_0482	0	Intragenic	Sense
NC_016856.1_465010	465010	+	gene	464882	465853	+	STM14_0483	0	Intragenic	Sense
NC_016856.1_465030	465030	+	gene	464882	465853	+	STM14_0483	0	Intragenic	Sense
NC_016856.1_465057	465057	+	gene	464882	465853	+	STM14_0483	0	Intragenic	Sense
NC_016856.1_465496	465496	+	gene	464882	465853	+	STM14_0483	0	Intragenic	Sense
NC_016856.1_465951	465951	+	gene	466001	466366	+	STM14_0484	50	Intergenic	Sense
NC_016856.1_465967	465967	-	gene	466001	466366	+	STM14_0484	34	Intergenic	Antisense
NC_016856.1_466242	466242	+	gene	466001	466366	+	STM14_0484	0	Intragenic	Sense
NC_016856.1_466386	466386	+	gene	466392	467084	+	STM14_0485	6	Intergenic	Sense
NC_016856.1_466441	466441	+	gene	466392	467084	+	STM14_0485	0	Intragenic	Sense
NC_016856.1_466861	466861	+	gene	466392	467084	+	STM14_0485	0	Intragenic	Sense
NC_016856.1_467222	467222	+	gene	467254	467601	+	STM14_0486	32	Intergenic	Sense
NC_016856.1_467764	467764	-	gene	467619	467846	+	STM14_0487	0	Intragenic	Antisense
NC_016856.1_467857	467857	+	gene	467849	468175	-	STM14_0488	0	Intragenic	Antisense
NC_016856.1_467990	467990	-	gene	467849	468175	-	STM14_0488	0	Intragenic	Sense
NC_016856.1_468366	468366	-	gene	468230	469093	-	STM14_0489	0	Intragenic	Sense
NC_016856.1_468477	468477	-	gene	468230	469093	-	STM14_0489	0	Intragenic	Sense
NC_016856.1_468922	468922	+	gene	468230	469093	-	STM14_0489	0	Intragenic	Antisense
NC_016856.1_469931	469931	+	gene	469393	469932	-	STM14_0490	0	Intragenic	Antisense
NC_016856.1_469958	469958	-	gene	469393	469932	-	STM14_0490	-26	Intergenic	Sense
NC_016856.1_470039	470039	-	gene	470084	470533	+	STM14_0492	45	Intergenic	Antisense
NC_016856.1_470057	470057	+	gene	470084	470533	+	STM14_0492	27	Intergenic	Sense
NC_016856.1_470339	470339	+	gene	470084	470533	+	STM14_0492	0	Intragenic	Sense
NC_016856.1_471116	471116	+	gene	470537	471640	+	STM14_0493	0	Intragenic	Sense
NC_016856.1_471773	471773	-	gene	471729	472199	+	STM14_0494	0	Intragenic	Antisense
NC_016856.1_471881	471881	+	gene	471729	472199	+	STM14_0494	0	Intragenic	Sense
NC_016856.1_472529	472529	+	gene	472220	472639	+	STM14_0495	0	Intragenic	Sense
NC_016856.1_472724	472724	+	gene	472718	473695	+	STM14_0496	0	Intragenic	Sense
NC_016856.1_474115	474115	+	gene	473673	474188	+	STM14_0497	0	Intragenic	Sense
NC_016856.1_474156	474156	+	gene	473673	474188	+	STM14_0497	0	Intragenic	Sense
NC_016856.1_475292	475292	-	gene	474292	475266	-	STM14_0499	-26	Intergenic	Sense
NC_016856.1_475976	475976	-	gene	475323	477185	-	STM14_0500	0	Intragenic	Sense
NC_016856.1_477527	477527	-	gene	477209	478108	-	STM14_0501	0	Intragenic	Sense
NC_016856.1_477978	477978	-	gene	477209	478108	-	STM14_0501	0	Intragenic	Sense
NC_016856.1_478108	478108	-	gene	477209	478108	-	STM14_0501	0	Intragenic	Sense
NC_016856.1_478383	478383	-	gene	478109	478351	-	STM14_0502	-32	Intergenic	Sense
NC_016856.1_478395	478395	+	gene	478109	478351	-	STM14_0502	-44	Intergenic	Antisense
NC_016856.1_478905	478905	-	gene	478561	480009	+	STM14_0503	0	Intragenic	Antisense
NC_016856.1_479719	479719	+	gene	478561	480009	+	STM14_0503	0	Intragenic	Sense
NC_016856.1_482259	482259	-	gene	481716	482825	-	STM14_0506	0	Intragenic	Sense
NC_016856.1_482591	482591	-	gene	481716	482825	-	STM14_0506	0	Intragenic	Sense
NC_016856.1_483055	483055	-	gene	482831	483844	-	STM14_0507	0	Intragenic	Sense
NC_016856.1_483661	483661	-	gene	482831	483844	-	STM14_0507	0	Intragenic	Sense
NC_016856.1_484113	484113	-	gene	484042	484761	-	STM14_0508	0	Intragenic	Sense
NC_016856.1_484784	484784	-	gene	484042	484761	-	STM14_0508	-23	Intergenic	Sense
NC_016856.1_485009	485009	+	gene	484901	486004	+	STM14_0510	0	Intragenic	Sense
NC_016856.1_485015	485015	+	gene	484901	486004	+	STM14_0510	0	Intragenic	Sense
NC_016856.1_487659	487659	+	gene	487473	488384	-	STM14_0513	0	Intragenic	Antisense
NC_016856.1_487687	487687	-	gene	487473	488384	-	STM14_0513	0	Intragenic	Sense
NC_016856.1_488085	488085	-	gene	487473	488384	-	STM14_0513	0	Intragenic	Sense
NC_016856.1_488375	488375	-	gene	487473	488384	-	STM14_0513	0	Intragenic	Sense
NC_016856.1_488419	488419	-	gene	487473	488384	-	STM14_0513	-35	Intergenic	Sense
NC_016856.1_488457	488457	+	gene	488492	489001	+	STM14_0514	35	Intergenic	Sense
NC_016856.1_488466	488466	-	gene	488492	489001	+	STM14_0514	26	Intergenic	Antisense
NC_016856.1_488485	488485	+	gene	488492	489001	+	STM14_0514	7	Intergenic	Sense
NC_016856.1_488500	488500	+	gene	488492	489001	+	STM14_0514	0	Intragenic	Sense
NC_016856.1_488536	488536	+	gene	488492	489001	+	STM14_0514	0	Intragenic	Sense
NC_016856.1_489593	489593	-	gene	489048	490412	-	STM14_0515	0	Intragenic	Sense
NC_016856.1_490433	490433	-	gene	489048	490412	-	STM14_0515	-21	Intergenic	Sense
NC_016856.1_490536	490536	+	pseudogene	490640	490863	-	STM14_0516	104	Intergenic	Antisense
NC_016856.1_490623	490623	-	pseudogene	490640	490863	-	STM14_0516	17	Intergenic	Sense
NC_016856.1_490803	490803	+	pseudogene	490640	490863	-	STM14_0516	0	Intragenic	Antisense
NC_016856.1_490920	490920	-	gene	490949	492460	+	STM14_0517	29	Intergenic	Antisense
NC_016856.1_490968	490968	-	gene	490949	492460	+	STM14_0517	0	Intragenic	Antisense
NC_016856.1_491053	491053	+	gene	490949	492460	+	STM14_0517	0	Intragenic	Sense
NC_016856.1_493647	493647	+	gene	492637	493965	+	STM14_0518	0	Intragenic	Sense
NC_016856.1_493958	493958	+	gene	492637	493965	+	STM14_0518	0	Intragenic	Sense
NC_016856.1_494924	494924	-	gene	494047	494937	-	STM14_0519	0	Intragenic	Sense
NC_016856.1_495311	495311	-	gene	495278	495892	-	STM14_0521	0	Intragenic	Sense
NC_016856.1_495781	495781	-	gene	495278	495892	-	STM14_0521	0	Intragenic	Sense
NC_016856.1_495791	495791	-	gene	495278	495892	-	STM14_0521	0	Intragenic	Sense
NC_016856.1_496009	496009	-	gene	495882	497873	-	STM14_0522	0	Intragenic	Sense
NC_016856.1_497048	497048	-	gene	495882	497873	-	STM14_0522	0	Intragenic	Sense
NC_016856.1_498112	498112	+	gene	497884	498840	-	STM14_0523	0	Intragenic	Antisense
NC_016856.1_498735	498735	-	gene	497884	498840	-	STM14_0523	0	Intragenic	Sense
NC_016856.1_498814	498814	-	gene	497884	498840	-	STM14_0523	0	Intragenic	Sense
NC_016856.1_498883	498883	-	gene	497884	498840	-	STM14_0523	-43	Intergenic	Sense
NC_016856.1_498894	498894	-	gene	497884	498840	-	STM14_0523	-54	Intergenic	Sense
NC_016856.1_498979	498979	-	gene	497884	498840	-	STM14_0523	-139	Intergenic	Sense
NC_016856.1_498996	498996	+	gene	497884	498840	-	STM14_0523	-156	Intergenic	Antisense
NC_016856.1_499026	499026	+	gene	497884	498840	-	STM14_0523	-186	Intergenic	Antisense
NC_016856.1_500845	500845	+	gene	500812	501441	-	STM14_0525	0	Intragenic	Antisense
NC_016856.1_501433	501433	-	gene	500812	501441	-	STM14_0525	0	Intragenic	Sense
NC_016856.1_501506	501506	+	gene	501468	501653	+	STM14_0526	0	Intragenic	Sense
NC_016856.1_501574	501574	+	gene	501468	501653	+	STM14_0526	0	Intragenic	Sense
NC_016856.1_501646	501646	+	gene	501468	501653	+	STM14_0526	0	Intragenic	Sense
NC_016856.1_501657	501657	+	gene	501468	501653	+	STM14_0526	-4	Intergenic	Sense
NC_016856.1_501675	501675	+	gene	501694	502011	+	STM14_0527	19	Intergenic	Sense
NC_016856.1_501719	501719	+	gene	501694	502011	+	STM14_0527	0	Intragenic	Sense
NC_016856.1_501938	501938	+	gene	501694	502011	+	STM14_0527	0	Intragenic	Sense
NC_016856.1_502125	502125	-	pseudogene	502022	502210	+	STM14_RS24435	0	Intragenic	Antisense
NC_016856.1_502151	502151	+	pseudogene	502022	502210	+	STM14_RS24435	0	Intragenic	Sense
NC_016856.1_502217	502217	+	pseudogene	502022	502210	+	STM14_RS24435	-7	Intergenic	Sense
NC_016856.1_502234	502234	+	pseudogene	502022	502210	+	STM14_RS24435	-24	Intergenic	Sense
NC_016856.1_503007	503007	-	gene	502358	503656	+	STM14_0529	0	Intragenic	Antisense
NC_016856.1_503555	503555	+	gene	502358	503656	+	STM14_0529	0	Intragenic	Sense
NC_016856.1_503780	503780	+	gene	503903	504526	+	STM14_0530	123	Intergenic	Sense
NC_016856.1_503802	503802	+	gene	503903	504526	+	STM14_0530	101	Intergenic	Sense
NC_016856.1_503830	503830	+	gene	503903	504526	+	STM14_0530	73	Intergenic	Sense
NC_016856.1_503868	503868	+	gene	503903	504526	+	STM14_0530	35	Intergenic	Sense
NC_016856.1_503874	503874	-	gene	503903	504526	+	STM14_0530	29	Intergenic	Antisense
NC_016856.1_504065	504065	+	gene	503903	504526	+	STM14_0530	0	Intragenic	Sense
NC_016856.1_504420	504420	+	gene	503903	504526	+	STM14_0530	0	Intragenic	Sense
NC_016856.1_504428	504428	+	gene	503903	504526	+	STM14_0530	0	Intragenic	Sense
NC_016856.1_504495	504495	+	gene	503903	504526	+	STM14_0530	0	Intragenic	Sense
NC_016856.1_504687	504687	+	gene	504778	506049	+	STM14_0532	91	Intergenic	Sense
NC_016856.1_505351	505351	+	gene	504778	506049	+	STM14_0532	0	Intragenic	Sense
NC_016856.1_506163	506163	+	gene	506235	508589	+	STM14_0533	72	Intergenic	Sense
NC_016856.1_506203	506203	+	gene	506235	508589	+	STM14_0533	32	Intergenic	Sense
NC_016856.1_506228	506228	+	gene	506235	508589	+	STM14_0533	7	Intergenic	Sense
NC_016856.1_506327	506327	+	gene	506235	508589	+	STM14_0533	0	Intragenic	Sense
NC_016856.1_507963	507963	+	gene	506235	508589	+	STM14_0533	0	Intragenic	Sense
NC_016856.1_508439	508439	+	gene	506235	508589	+	STM14_0533	0	Intragenic	Sense
NC_016856.1_508453	508453	+	gene	506235	508589	+	STM14_0533	0	Intragenic	Sense
NC_016856.1_508461	508461	+	gene	506235	508589	+	STM14_0533	0	Intragenic	Sense
NC_016856.1_508680	508680	+	gene	506235	508589	+	STM14_0533	-91	Intergenic	Sense
NC_016856.1_508704	508704	+	gene	508798	509070	+	STM14_0534	94	Intergenic	Sense
NC_016856.1_508742	508742	+	gene	508798	509070	+	STM14_0534	56	Intergenic	Sense
NC_016856.1_508786	508786	+	gene	508798	509070	+	STM14_0534	12	Intergenic	Sense
NC_016856.1_508812	508812	+	gene	508798	509070	+	STM14_0534	0	Intragenic	Sense
NC_016856.1_508825	508825	+	gene	508798	509070	+	STM14_0534	0	Intragenic	Sense
NC_016856.1_508833	508833	+	gene	508798	509070	+	STM14_0534	0	Intragenic	Sense
NC_016856.1_508860	508860	+	gene	508798	509070	+	STM14_0534	0	Intragenic	Sense
NC_016856.1_508886	508886	+	gene	508798	509070	+	STM14_0534	0	Intragenic	Sense
NC_016856.1_508899	508899	+	gene	508798	509070	+	STM14_0534	0	Intragenic	Sense
NC_016856.1_508914	508914	+	gene	508798	509070	+	STM14_0534	0	Intragenic	Sense
NC_016856.1_508917	508917	+	gene	508798	509070	+	STM14_0534	0	Intragenic	Sense
NC_016856.1_509199	509199	+	gene	508798	509070	+	STM14_0534	-129	Intergenic	Sense
NC_016856.1_509829	509829	-	gene	509361	511232	+	STM14_0535	0	Intragenic	Antisense
NC_016856.1_510136	510136	+	gene	509361	511232	+	STM14_0535	0	Intragenic	Sense
NC_016856.1_510137	510137	-	gene	509361	511232	+	STM14_0535	0	Intragenic	Antisense
NC_016856.1_512483	512483	-	gene	512364	513059	-	STM14_0539	0	Intragenic	Sense
NC_016856.1_513082	513082	-	gene	512364	513059	-	STM14_0539	-23	Intergenic	Sense
NC_016856.1_513284	513284	+	gene	513124	514824	-	STM14_0540	0	Intragenic	Antisense
NC_016856.1_513728	513728	-	gene	513124	514824	-	STM14_0540	0	Intragenic	Sense
NC_016856.1_513743	513743	+	gene	513124	514824	-	STM14_0540	0	Intragenic	Antisense
NC_016856.1_514860	514860	-	gene	513124	514824	-	STM14_0540	-36	Intergenic	Sense
NC_016856.1_514894	514894	+	gene	514925	515743	+	STM14_0541	31	Intergenic	Sense
NC_016856.1_515695	515695	+	gene	514925	515743	+	STM14_0541	0	Intragenic	Sense
NC_016856.1_515703	515703	+	gene	514925	515743	+	STM14_0541	0	Intragenic	Sense
NC_016856.1_516125	516125	-	gene	515792	516847	-	STM14_0542	0	Intragenic	Sense
NC_016856.1_516934	516934	+	gene	516960	517418	+	STM14_RS02915	26	Intergenic	Sense
NC_016856.1_516981	516981	+	gene	516960	517418	+	STM14_RS02915	0	Intragenic	Sense
NC_016856.1_517055	517055	+	gene	516960	517418	+	STM14_RS02915	0	Intragenic	Sense
NC_016856.1_517431	517431	-	gene	516960	517418	+	STM14_RS02915	-13	Intergenic	Antisense
NC_016856.1_517682	517682	+	gene	517459	519231	+	STM14_0544	0	Intragenic	Sense
NC_016856.1_518586	518586	-	gene	517459	519231	+	STM14_0544	0	Intragenic	Antisense
NC_016856.1_519408	519408	+	gene	519224	521005	+	STM14_0545	0	Intragenic	Sense
NC_016856.1_521166	521166	+	gene	521039	521221	+	STM14_RS24440	0	Intragenic	Sense
NC_016856.1_521957	521957	+	gene	521588	522874	+	STM14_0547	0	Intragenic	Sense
NC_016856.1_523105	523105	+	gene	522974	523834	-	STM14_0548	0	Intragenic	Antisense
NC_016856.1_523750	523750	-	gene	522974	523834	-	STM14_0548	0	Intragenic	Sense
NC_016856.1_523778	523778	-	gene	522974	523834	-	STM14_0548	0	Intragenic	Sense
NC_016856.1_523848	523848	+	gene	522974	523834	-	STM14_0548	-14	Intergenic	Antisense
NC_016856.1_523871	523871	-	gene	522974	523834	-	STM14_0548	-37	Intergenic	Sense
NC_016856.1_523977	523977	+	gene	524049	524618	+	STM14_0549	72	Intergenic	Sense
NC_016856.1_524980	524980	-	gene	524651	525040	-	STM14_RS02950	0	Intragenic	Sense
NC_016856.1_524981	524981	-	gene	524651	525040	-	STM14_RS02950	0	Intragenic	Sense
NC_016856.1_525091	525091	+	gene	525125	525221	+	STM14_RS24150	34	Intergenic	Sense
NC_016856.1_525117	525117	+	gene	525125	525221	+	STM14_RS24150	8	Intergenic	Sense
NC_016856.1_525136	525136	+	gene	525125	525221	+	STM14_RS24150	0	Intragenic	Sense
NC_016856.1_525146	525146	+	gene	525125	525221	+	STM14_RS24150	0	Intragenic	Sense
NC_016856.1_525150	525150	+	gene	525125	525221	+	STM14_RS24150	0	Intragenic	Sense
NC_016856.1_525188	525188	+	gene	525125	525221	+	STM14_RS24150	0	Intragenic	Sense
NC_016856.1_525206	525206	+	gene	525125	525221	+	STM14_RS24150	0	Intragenic	Sense
NC_016856.1_525355	525355	+	gene	525271	526821	-	STM14_0552	0	Intragenic	Antisense
NC_016856.1_525432	525432	-	gene	525271	526821	-	STM14_0552	0	Intragenic	Sense
NC_016856.1_525951	525951	-	gene	525271	526821	-	STM14_0552	0	Intragenic	Sense
NC_016856.1_526077	526077	-	gene	525271	526821	-	STM14_0552	0	Intragenic	Sense
NC_016856.1_526835	526835	-	gene	525271	526821	-	STM14_0552	-14	Intergenic	Sense
NC_016856.1_526846	526846	-	gene	525271	526821	-	STM14_0552	-25	Intergenic	Sense
NC_016856.1_526876	526876	-	gene	525271	526821	-	STM14_0552	-55	Intergenic	Sense
NC_016856.1_526887	526887	-	gene	525271	526821	-	STM14_0552	-66	Intergenic	Sense
NC_016856.1_527019	527019	+	gene	527046	527306	+	STM14_0553	27	Intergenic	Sense
NC_016856.1_527334	527334	+	gene	527312	527452	+	STM14_0554	0	Intragenic	Sense
NC_016856.1_528017	528017	-	gene	527508	527978	-	STM14_0555	-39	Intergenic	Sense
NC_016856.1_528061	528061	-	gene	528095	528646	-	STM14_0556	34	Intergenic	Sense
NC_016856.1_528108	528108	+	gene	528095	528646	-	STM14_0556	0	Intragenic	Antisense
NC_016856.1_528235	528235	-	gene	528095	528646	-	STM14_0556	0	Intragenic	Sense
NC_016856.1_528547	528547	+	gene	528095	528646	-	STM14_0556	0	Intragenic	Antisense
NC_016856.1_528660	528660	-	gene	528095	528646	-	STM14_0556	-14	Intergenic	Sense
NC_016856.1_528776	528776	+	gene	528825	529043	-	STM14_0557	49	Intergenic	Antisense
NC_016856.1_528805	528805	-	gene	528825	529043	-	STM14_0557	20	Intergenic	Sense
NC_016856.1_528852	528852	+	gene	528825	529043	-	STM14_0557	0	Intragenic	Antisense
NC_016856.1_529016	529016	-	gene	528825	529043	-	STM14_0557	0	Intragenic	Sense
NC_016856.1_529142	529142	-	gene	529071	529445	-	STM14_0558	0	Intragenic	Sense
NC_016856.1_529162	529162	-	gene	529071	529445	-	STM14_0558	0	Intragenic	Sense
NC_016856.1_529238	529238	-	gene	529071	529445	-	STM14_0558	0	Intragenic	Sense
NC_016856.1_529247	529247	-	gene	529071	529445	-	STM14_0558	0	Intragenic	Sense
NC_016856.1_529410	529410	-	gene	529071	529445	-	STM14_0558	0	Intragenic	Sense
NC_016856.1_529534	529534	-	gene	529071	529445	-	STM14_0558	-89	Intergenic	Sense
NC_016856.1_529556	529556	+	gene	529071	529445	-	STM14_0558	-111	Intergenic	Antisense
NC_016856.1_529567	529567	-	gene	529071	529445	-	STM14_0558	-122	Intergenic	Sense
NC_016856.1_529711	529711	-	gene	529941	533090	-	STM14_0559	230	Intergenic	Sense
NC_016856.1_529824	529824	-	gene	529941	533090	-	STM14_0559	117	Intergenic	Sense
NC_016856.1_530219	530219	-	gene	529941	533090	-	STM14_0559	0	Intragenic	Sense
NC_016856.1_531375	531375	+	gene	529941	533090	-	STM14_0559	0	Intragenic	Antisense
NC_016856.1_531510	531510	+	gene	529941	533090	-	STM14_0559	0	Intragenic	Antisense
NC_016856.1_532896	532896	+	gene	529941	533090	-	STM14_0559	0	Intragenic	Antisense
NC_016856.1_532932	532932	+	gene	529941	533090	-	STM14_0559	0	Intragenic	Antisense
NC_016856.1_533195	533195	+	gene	533113	534306	-	STM14_0560	0	Intragenic	Antisense
NC_016856.1_534371	534371	-	gene	533113	534306	-	STM14_0560	-65	Intergenic	Sense
NC_016856.1_534386	534386	-	gene	534448	535101	+	STM14_0561	62	Intergenic	Antisense
NC_016856.1_534403	534403	+	gene	534448	535101	+	STM14_0561	45	Intergenic	Sense
NC_016856.1_534666	534666	-	gene	534448	535101	+	STM14_0561	0	Intragenic	Antisense
NC_016856.1_534713	534713	-	gene	534448	535101	+	STM14_0561	0	Intragenic	Antisense
NC_016856.1_534738	534738	-	gene	534448	535101	+	STM14_0561	0	Intragenic	Antisense
NC_016856.1_534742	534742	+	gene	534448	535101	+	STM14_0561	0	Intragenic	Sense
NC_016856.1_534773	534773	-	gene	534448	535101	+	STM14_0561	0	Intragenic	Antisense
NC_016856.1_534792	534792	-	gene	534448	535101	+	STM14_0561	0	Intragenic	Antisense
NC_016856.1_534795	534795	+	gene	534448	535101	+	STM14_0561	0	Intragenic	Sense
NC_016856.1_534904	534904	+	gene	534448	535101	+	STM14_0561	0	Intragenic	Sense
NC_016856.1_534913	534913	+	gene	534448	535101	+	STM14_0561	0	Intragenic	Sense
NC_016856.1_535114	535114	+	gene	534448	535101	+	STM14_0561	-13	Intergenic	Sense
NC_016856.1_535176	535176	+	gene	535220	538582	+	STM14_0563	44	Intergenic	Sense
NC_016856.1_537686	537686	+	gene	535220	538582	+	STM14_0563	0	Intragenic	Sense
NC_016856.1_539063	539063	-	gene	538624	539559	-	STM14_0564	0	Intragenic	Sense
NC_016856.1_539140	539140	-	gene	538624	539559	-	STM14_0564	0	Intragenic	Sense
NC_016856.1_539584	539584	-	gene	538624	539559	-	STM14_0564	-25	Intergenic	Sense
NC_016856.1_539651	539651	-	gene	539629	539796	-	STM14_0565	0	Intragenic	Sense
NC_016856.1_540314	540314	-	gene	539810	540325	-	STM14_0566	0	Intragenic	Sense
NC_016856.1_540384	540384	+	gene	540406	540783	+	STM14_0567	22	Intergenic	Sense
NC_016856.1_540412	540412	-	gene	540406	540783	+	STM14_0567	0	Intragenic	Antisense
NC_016856.1_540459	540459	+	gene	540406	540783	+	STM14_0567	0	Intragenic	Sense
NC_016856.1_540696	540696	+	gene	540406	540783	+	STM14_0567	0	Intragenic	Sense
NC_016856.1_541025	541025	-	gene	540936	541487	+	STM14_0568	0	Intragenic	Antisense
NC_016856.1_542180	542180	+	gene	541601	543529	+	STM14_0569	0	Intragenic	Sense
NC_016856.1_542576	542576	-	gene	541601	543529	+	STM14_0569	0	Intragenic	Antisense
NC_016856.1_542593	542593	+	gene	541601	543529	+	STM14_0569	0	Intragenic	Sense
NC_016856.1_543471	543471	+	gene	541601	543529	+	STM14_0569	0	Intragenic	Sense
NC_016856.1_544383	544383	+	gene	543904	544509	+	STM14_0571	0	Intragenic	Sense
NC_016856.1_544574	544574	-	gene	544596	546494	+	STM14_0572	22	Intergenic	Antisense
NC_016856.1_544575	544575	+	gene	544596	546494	+	STM14_0572	21	Intergenic	Sense
NC_016856.1_544585	544585	-	gene	544596	546494	+	STM14_0572	11	Intergenic	Antisense
NC_016856.1_544592	544592	+	gene	544596	546494	+	STM14_0572	4	Intergenic	Sense
NC_016856.1_545528	545528	-	gene	544596	546494	+	STM14_0572	0	Intragenic	Antisense
NC_016856.1_545993	545993	+	gene	544596	546494	+	STM14_0572	0	Intragenic	Sense
NC_016856.1_546693	546693	+	gene	546597	546818	-	STM14_0573	0	Intragenic	Antisense
NC_016856.1_546753	546753	+	gene	546597	546818	-	STM14_0573	0	Intragenic	Antisense
NC_016856.1_546753	546753	+	gene	546735	547379	+	STM14_0574	0	Intragenic	Sense
NC_016856.1_546915	546915	+	gene	546735	547379	+	STM14_0574	0	Intragenic	Sense
NC_016856.1_547067	547067	+	gene	546735	547379	+	STM14_0574	0	Intragenic	Sense
NC_016856.1_547546	547546	-	gene	547392	547598	+	STM14_0575	0	Intragenic	Antisense
NC_016856.1_547568	547568	-	gene	547392	547598	+	STM14_0575	0	Intragenic	Antisense
NC_016856.1_547584	547584	+	gene	547392	547598	+	STM14_0575	0	Intragenic	Sense
NC_016856.1_549267	549267	-	gene	548567	549538	-	STM14_0577	0	Intragenic	Sense
NC_016856.1_549556	549556	-	gene	548567	549538	-	STM14_0577	-18	Intergenic	Sense
NC_016856.1_549558	549558	-	gene	548567	549538	-	STM14_0577	-20	Intergenic	Sense
NC_016856.1_550076	550076	+	gene	549691	550995	+	STM14_0578	0	Intragenic	Sense
NC_016856.1_550097	550097	+	gene	549691	550995	+	STM14_0578	0	Intragenic	Sense
NC_016856.1_550406	550406	+	gene	549691	550995	+	STM14_0578	0	Intragenic	Sense
NC_016856.1_550898	550898	+	gene	549691	550995	+	STM14_0578	0	Intragenic	Sense
NC_016856.1_550907	550907	+	gene	549691	550995	+	STM14_0578	0	Intragenic	Sense
NC_016856.1_551160	551160	-	gene	551044	552720	-	STM14_0579	0	Intragenic	Sense
NC_016856.1_551577	551577	-	gene	551044	552720	-	STM14_0579	0	Intragenic	Sense
NC_016856.1_552754	552754	-	gene	551044	552720	-	STM14_0579	-34	Intergenic	Sense
NC_016856.1_554285	554285	+	gene	554328	555980	+	STM14_0582	43	Intergenic	Sense
NC_016856.1_554305	554305	+	gene	554328	555980	+	STM14_0582	23	Intergenic	Sense
NC_016856.1_554896	554896	+	gene	554328	555980	+	STM14_0582	0	Intragenic	Sense
NC_016856.1_555487	555487	+	gene	554328	555980	+	STM14_0582	0	Intragenic	Sense
NC_016856.1_556590	556590	+	gene	556097	556576	-	STM14_0583	-14	Intergenic	Antisense
NC_016856.1_556605	556605	-	gene	556097	556576	-	STM14_0583	-29	Intergenic	Sense
NC_016856.1_556633	556633	-	gene	556097	556576	-	STM14_0583	-57	Intergenic	Sense
NC_016856.1_556646	556646	+	gene	556097	556576	-	STM14_0583	-70	Intergenic	Antisense
NC_016856.1_556656	556656	+	gene	556097	556576	-	STM14_0583	-80	Intergenic	Antisense
NC_016856.1_556657	556657	+	gene	556097	556576	-	STM14_0583	-81	Intergenic	Antisense
NC_016856.1_556686	556686	+	gene	556778	557572	-	STM14_0584	92	Intergenic	Antisense
NC_016856.1_556700	556700	+	gene	556778	557572	-	STM14_0584	78	Intergenic	Antisense
NC_016856.1_556717	556717	-	gene	556778	557572	-	STM14_0584	61	Intergenic	Sense
NC_016856.1_556721	556721	+	gene	556778	557572	-	STM14_0584	57	Intergenic	Antisense
NC_016856.1_557159	557159	+	gene	556778	557572	-	STM14_0584	0	Intragenic	Antisense
NC_016856.1_557563	557563	+	gene	556778	557572	-	STM14_0584	0	Intragenic	Antisense
NC_016856.1_557591	557591	-	gene	556778	557572	-	STM14_0584	-19	Intergenic	Sense
NC_016856.1_557872	557872	-	gene	557658	558485	-	STM14_0585	0	Intragenic	Sense
NC_016856.1_558362	558362	+	gene	557658	558485	-	STM14_0585	0	Intragenic	Antisense
NC_016856.1_559899	559899	+	gene	558639	561140	-	STM14_0586	0	Intragenic	Antisense
NC_016856.1_561133	561133	-	gene	558639	561140	-	STM14_0586	0	Intragenic	Sense
NC_016856.1_561166	561166	+	gene	558639	561140	-	STM14_0586	-26	Intergenic	Antisense
NC_016856.1_561202	561202	-	gene	561250	561666	+	STM14_0587	48	Intergenic	Antisense
NC_016856.1_561435	561435	+	gene	561250	561666	+	STM14_0587	0	Intragenic	Sense
NC_016856.1_563021	563021	-	gene	562116	563033	-	STM14_0589	0	Intragenic	Sense
NC_016856.1_563082	563082	-	gene	562116	563033	-	STM14_0589	-49	Intergenic	Sense
NC_016856.1_563126	563126	-	gene	563180	563857	+	STM14_0590	54	Intergenic	Antisense
NC_016856.1_563150	563150	+	gene	563180	563857	+	STM14_0590	30	Intergenic	Sense
NC_016856.1_564589	564589	+	gene	563844	564623	+	STM14_0591	0	Intragenic	Sense
NC_016856.1_565587	565587	-	gene	564709	565563	-	STM14_0592	-24	Intergenic	Sense
NC_016856.1_566432	566432	-	gene	565623	566393	-	STM14_0593	-39	Intergenic	Sense
NC_016856.1_567197	567197	-	gene	567133	567819	+	STM14_0595	0	Intragenic	Antisense
NC_016856.1_568692	568692	+	gene	567816	570230	+	STM14_0596	0	Intragenic	Sense
NC_016856.1_570210	570210	-	gene	567816	570230	+	STM14_0596	0	Intragenic	Antisense
NC_016856.1_570677	570677	+	gene	570416	571549	+	STM14_0598	0	Intragenic	Sense
NC_016856.1_570800	570800	+	gene	570416	571549	+	STM14_0598	0	Intragenic	Sense
NC_016856.1_571015	571015	-	gene	570416	571549	+	STM14_0598	0	Intragenic	Antisense
NC_016856.1_571037	571037	+	gene	570416	571549	+	STM14_0598	0	Intragenic	Sense
NC_016856.1_571097	571097	+	gene	570416	571549	+	STM14_0598	0	Intragenic	Sense
NC_016856.1_571723	571723	+	gene	571806	572636	+	STM14_0600	83	Intergenic	Sense
NC_016856.1_573245	573245	-	gene	572673	573689	+	STM14_0601	0	Intragenic	Antisense
NC_016856.1_573263	573263	+	gene	572673	573689	+	STM14_0601	0	Intragenic	Sense
NC_016856.1_573683	573683	-	gene	572673	573689	+	STM14_0601	0	Intragenic	Antisense
NC_016856.1_573683	573683	-	gene	573682	574341	+	STM14_0602	0	Intragenic	Antisense
NC_016856.1_574084	574084	+	gene	573682	574341	+	STM14_0602	0	Intragenic	Sense
NC_016856.1_574370	574370	-	gene	574380	575474	-	STM14_0603	10	Intergenic	Sense
NC_016856.1_574478	574478	+	gene	574380	575474	-	STM14_0603	0	Intragenic	Antisense
NC_016856.1_575474	575474	-	gene	574380	575474	-	STM14_0603	0	Intragenic	Sense
NC_016856.1_575504	575504	-	gene	574380	575474	-	STM14_0603	-30	Intergenic	Sense
NC_016856.1_575572	575572	+	gene	575544	576470	-	STM14_0604	0	Intragenic	Antisense
NC_016856.1_576526	576526	-	gene	575544	576470	-	STM14_0604	-56	Intergenic	Sense
NC_016856.1_576637	576637	+	gene	576697	577179	+	STM14_0605	60	Intergenic	Sense
NC_016856.1_577211	577211	+	gene	576697	577179	+	STM14_0605	-32	Intergenic	Sense
NC_016856.1_577260	577260	+	gene	577258	578076	+	STM14_0606	0	Intragenic	Sense
NC_016856.1_577434	577434	-	gene	577258	578076	+	STM14_0606	0	Intragenic	Antisense
NC_016856.1_579337	579337	+	gene	578161	579942	+	STM14_0607	0	Intragenic	Sense
NC_016856.1_579993	579993	+	gene	579955	580731	+	STM14_0608	0	Intragenic	Sense
NC_016856.1_581221	581221	-	gene	580832	581710	+	STM14_0609	0	Intragenic	Antisense
NC_016856.1_581906	581906	-	gene	581776	583023	+	STM14_0610	0	Intragenic	Antisense
NC_016856.1_582499	582499	+	gene	581776	583023	+	STM14_0610	0	Intragenic	Sense
NC_016856.1_584973	584973	+	gene	584652	586013	+	STM14_0613	0	Intragenic	Sense
NC_016856.1_585217	585217	+	gene	584652	586013	+	STM14_0613	0	Intragenic	Sense
NC_016856.1_585644	585644	+	gene	584652	586013	+	STM14_0613	0	Intragenic	Sense
NC_016856.1_586324	586324	+	gene	586072	587370	+	STM14_0614	0	Intragenic	Sense
NC_016856.1_588618	588618	-	gene	588621	589406	-	STM14_0616	3	Intergenic	Sense
NC_016856.1_588989	588989	-	gene	588621	589406	-	STM14_0616	0	Intragenic	Sense
NC_016856.1_589221	589221	+	gene	588621	589406	-	STM14_0616	0	Intragenic	Antisense
NC_016856.1_589439	589439	-	gene	589417	590652	-	STM14_0617	0	Intragenic	Sense
NC_016856.1_591001	591001	-	gene	590674	591723	-	STM14_0618	0	Intragenic	Sense
NC_016856.1_591759	591759	-	gene	590674	591723	-	STM14_0618	-36	Intergenic	Sense
NC_016856.1_592156	592156	+	gene	592054	593718	+	STM14_0619	0	Intragenic	Sense
NC_016856.1_596679	596679	+	gene	595812	596705	+	STM14_0622	0	Intragenic	Sense
NC_016856.1_596889	596889	-	gene	596746	597813	-	STM14_0623	0	Intragenic	Sense
NC_016856.1_598657	598657	+	gene	598437	599159	-	STM14_0625	0	Intragenic	Antisense
NC_016856.1_598937	598937	+	gene	598437	599159	-	STM14_0625	0	Intragenic	Antisense
NC_016856.1_599709	599709	-	gene	599162	599656	-	STM14_0626	-53	Intergenic	Sense
NC_016856.1_599795	599795	+	gene	599829	601214	+	STM14_0627	34	Intergenic	Sense
NC_016856.1_599843	599843	-	gene	599829	601214	+	STM14_0627	0	Intragenic	Antisense
NC_016856.1_600016	600016	+	gene	599829	601214	+	STM14_0627	0	Intragenic	Sense
NC_016856.1_600056	600056	+	gene	599829	601214	+	STM14_0627	0	Intragenic	Sense
NC_016856.1_601397	601397	-	gene	601258	602082	-	STM14_0628	0	Intragenic	Sense
NC_016856.1_601766	601766	-	gene	601258	602082	-	STM14_0628	0	Intragenic	Sense
NC_016856.1_601803	601803	-	gene	601258	602082	-	STM14_0628	0	Intragenic	Sense
NC_016856.1_603407	603407	+	gene	603396	604262	-	STM14_0632	0	Intragenic	Antisense
NC_016856.1_603794	603794	-	gene	603396	604262	-	STM14_0632	0	Intragenic	Sense
NC_016856.1_603874	603874	-	gene	603396	604262	-	STM14_0632	0	Intragenic	Sense
NC_016856.1_604303	604303	-	gene	603396	604262	-	STM14_0632	-41	Intergenic	Sense
NC_016856.1_604617	604617	+	gene	604625	604819	+	STM14_RS24465	8	Intergenic	Sense
NC_016856.1_604920	604920	+	gene	604809	605366	+	STM14_0635	0	Intragenic	Sense
NC_016856.1_608566	608566	+	gene	606742	609354	+	STM14_0638	0	Intragenic	Sense
NC_016856.1_609749	609749	+	gene	609369	610376	+	STM14_0639	0	Intragenic	Sense
NC_016856.1_610797	610797	+	gene	610386	610904	+	STM14_0640	0	Intragenic	Sense
NC_016856.1_612006	612006	+	gene	612186	612908	-	STM14_0642	180	Intergenic	Antisense
NC_016856.1_612128	612128	+	gene	612186	612908	-	STM14_0642	58	Intergenic	Antisense
NC_016856.1_612676	612676	+	gene	612186	612908	-	STM14_0642	0	Intragenic	Antisense
NC_016856.1_613073	613073	+	gene	612927	613238	-	STM14_0643	0	Intragenic	Antisense
NC_016856.1_614027	614027	-	gene	613400	613996	-	STM14_0644	-31	Intergenic	Sense
NC_016856.1_614524	614524	+	pseudogene	614444	615111	-	STM14_0648	0	Intragenic	Antisense
NC_016856.1_615125	615125	-	pseudogene	614444	615111	-	STM14_0648	-14	Intergenic	Sense
NC_016856.1_615564	615564	-	gene	615498	617150	-	STM14_0650	0	Intragenic	Sense
NC_016856.1_616350	616350	-	gene	615498	617150	-	STM14_0650	0	Intragenic	Sense
NC_016856.1_616368	616368	+	gene	615498	617150	-	STM14_0650	0	Intragenic	Antisense
NC_016856.1_617625	617625	-	gene	617131	618057	-	STM14_0651	0	Intragenic	Sense
NC_016856.1_617901	617901	-	gene	617131	618057	-	STM14_0651	0	Intragenic	Sense
NC_016856.1_618014	618014	+	gene	617131	618057	-	STM14_0651	0	Intragenic	Antisense
NC_016856.1_618387	618387	-	gene	618054	618416	-	STM14_0652	0	Intragenic	Sense
NC_016856.1_618427	618427	+	gene	618054	618416	-	STM14_0652	-11	Intergenic	Antisense
NC_016856.1_618480	618480	+	gene	618054	618416	-	STM14_0652	-64	Intergenic	Antisense
NC_016856.1_618837	618837	+	gene	618914	619084	-	STM14_0654	77	Intergenic	Antisense
NC_016856.1_619221	619221	-	gene	619284	619613	-	STM14_0655	63	Intergenic	Sense
NC_016856.1_619232	619232	+	gene	619284	619613	-	STM14_0655	52	Intergenic	Antisense
NC_016856.1_619533	619533	-	gene	619284	619613	-	STM14_0655	0	Intragenic	Sense
NC_016856.1_620989	620989	+	gene	621022	622347	+	STM14_0658	33	Intergenic	Sense
NC_016856.1_621934	621934	+	gene	621022	622347	+	STM14_0658	0	Intragenic	Sense
NC_016856.1_622150	622150	+	gene	621022	622347	+	STM14_0658	0	Intragenic	Sense
NC_016856.1_622237	622237	+	gene	621022	622347	+	STM14_0658	0	Intragenic	Sense
NC_016856.1_622336	622336	-	gene	621022	622347	+	STM14_0658	0	Intragenic	Antisense
NC_016856.1_622336	622336	-	gene	622266	622520	-	STM14_0659	0	Intragenic	Sense
NC_016856.1_622458	622458	-	gene	622266	622520	-	STM14_0659	0	Intragenic	Sense
NC_016856.1_622628	622628	-	gene	622504	622740	+	STM14_0660	0	Intragenic	Antisense
NC_016856.1_622739	622739	+	gene	622504	622740	+	STM14_0660	0	Intragenic	Sense
NC_016856.1_623014	623014	+	gene	622753	623313	+	STM14_0661	0	Intragenic	Sense
NC_016856.1_623405	623405	+	gene	623392	624567	-	STM14_0662	0	Intragenic	Antisense
NC_016856.1_623892	623892	+	gene	623392	624567	-	STM14_0662	0	Intragenic	Antisense
NC_016856.1_624649	624649	-	gene	623392	624567	-	STM14_0662	-82	Intergenic	Sense
NC_016856.1_624692	624692	-	gene	623392	624567	-	STM14_0662	-125	Intergenic	Sense
NC_016856.1_624782	624782	-	gene	624893	626287	+	STM14_0663	111	Intergenic	Antisense
NC_016856.1_625349	625349	+	gene	624893	626287	+	STM14_0663	0	Intragenic	Sense
NC_016856.1_625571	625571	+	gene	624893	626287	+	STM14_0663	0	Intragenic	Sense
NC_016856.1_625666	625666	+	gene	624893	626287	+	STM14_0663	0	Intragenic	Sense
NC_016856.1_625813	625813	+	gene	624893	626287	+	STM14_0663	0	Intragenic	Sense
NC_016856.1_626017	626017	+	gene	624893	626287	+	STM14_0663	0	Intragenic	Sense
NC_016856.1_626056	626056	+	gene	624893	626287	+	STM14_0663	0	Intragenic	Sense
NC_016856.1_626185	626185	+	gene	624893	626287	+	STM14_0663	0	Intragenic	Sense
NC_016856.1_626197	626197	+	gene	624893	626287	+	STM14_0663	0	Intragenic	Sense
NC_016856.1_626204	626204	+	gene	624893	626287	+	STM14_0663	0	Intragenic	Sense
NC_016856.1_627728	627728	-	gene	627606	627788	+	STM14_0665	0	Intragenic	Antisense
NC_016856.1_627857	627857	-	gene	627887	629857	+	STM14_0666	30	Intergenic	Antisense
NC_016856.1_627880	627880	+	gene	627887	629857	+	STM14_0666	7	Intergenic	Sense
NC_016856.1_628055	628055	+	gene	627887	629857	+	STM14_0666	0	Intragenic	Sense
NC_016856.1_628664	628664	+	gene	627887	629857	+	STM14_0666	0	Intragenic	Sense
NC_016856.1_629096	629096	+	gene	627887	629857	+	STM14_0666	0	Intragenic	Sense
NC_016856.1_629102	629102	+	gene	627887	629857	+	STM14_0666	0	Intragenic	Sense
NC_016856.1_629327	629327	+	gene	627887	629857	+	STM14_0666	0	Intragenic	Sense
NC_016856.1_629329	629329	-	gene	627887	629857	+	STM14_0666	0	Intragenic	Antisense
NC_016856.1_629367	629367	+	gene	627887	629857	+	STM14_0666	0	Intragenic	Sense
NC_016856.1_630002	630002	+	gene	630024	632753	+	STM14_0667	22	Intergenic	Sense
NC_016856.1_630808	630808	-	gene	630024	632753	+	STM14_0667	0	Intragenic	Antisense
NC_016856.1_630864	630864	-	gene	630024	632753	+	STM14_0667	0	Intragenic	Antisense
NC_016856.1_631585	631585	+	gene	630024	632753	+	STM14_0667	0	Intragenic	Sense
NC_016856.1_632163	632163	+	gene	630024	632753	+	STM14_0667	0	Intragenic	Sense
NC_016856.1_632729	632729	+	gene	630024	632753	+	STM14_0667	0	Intragenic	Sense
NC_016856.1_635087	635087	-	gene	635010	635864	-	STM14_0670	0	Intragenic	Sense
NC_016856.1_637551	637551	-	gene	637073	637522	-	STM14_0673	-29	Intergenic	Sense
NC_016856.1_638407	638407	-	gene	637722	638375	-	STM14_0674	-32	Intergenic	Sense
NC_016856.1_638583	638583	+	gene	638472	638840	-	STM14_0675	0	Intragenic	Antisense
NC_016856.1_639005	639005	-	gene	638840	639421	-	STM14_0676	0	Intragenic	Sense
NC_016856.1_639448	639448	-	gene	638840	639421	-	STM14_0676	-27	Intergenic	Sense
NC_016856.1_639652	639652	+	gene	639710	640051	+	STM14_0678	58	Intergenic	Sense
NC_016856.1_641396	641396	-	gene	640372	641490	-	STM14_0680	0	Intragenic	Sense
NC_016856.1_641514	641514	-	gene	641502	642206	-	STM14_0681	0	Intragenic	Sense
NC_016856.1_641600	641600	+	gene	641502	642206	-	STM14_0681	0	Intragenic	Antisense
NC_016856.1_642289	642289	-	gene	642252	644507	-	STM14_0682	0	Intragenic	Sense
NC_016856.1_642633	642633	+	gene	642252	644507	-	STM14_0682	0	Intragenic	Antisense
NC_016856.1_642935	642935	-	gene	642252	644507	-	STM14_0682	0	Intragenic	Sense
NC_016856.1_643810	643810	-	gene	642252	644507	-	STM14_0682	0	Intragenic	Sense
NC_016856.1_649564	649564	+	gene	646156	650040	+	STM14_0686	0	Intragenic	Sense
NC_016856.1_649685	649685	+	gene	646156	650040	+	STM14_0686	0	Intragenic	Sense
NC_016856.1_649878	649878	+	gene	646156	650040	+	STM14_0686	0	Intragenic	Sense
NC_016856.1_650246	650246	+	gene	650290	651426	+	STM14_0687	44	Intergenic	Sense
NC_016856.1_650869	650869	+	gene	650290	651426	+	STM14_0687	0	Intragenic	Sense
NC_016856.1_651349	651349	+	gene	650290	651426	+	STM14_0687	0	Intragenic	Sense
NC_016856.1_651397	651397	+	gene	650290	651426	+	STM14_0687	0	Intragenic	Sense
NC_016856.1_651578	651578	+	gene	651479	652273	-	STM14_0688	0	Intragenic	Antisense
NC_016856.1_653725	653725	-	gene	653259	654266	-	STM14_0690	0	Intragenic	Sense
NC_016856.1_654311	654311	-	gene	653259	654266	-	STM14_0690	-45	Intergenic	Sense
NC_016856.1_655386	655386	+	gene	654377	655621	+	STM14_0691	0	Intragenic	Sense
NC_016856.1_655417	655417	+	gene	654377	655621	+	STM14_0691	0	Intragenic	Sense
NC_016856.1_656753	656753	-	gene	655684	656640	-	STM14_0692	-113	Intergenic	Sense
NC_016856.1_656787	656787	-	gene	655684	656640	-	STM14_0692	-147	Intergenic	Sense
NC_016856.1_656960	656960	+	gene	656949	658124	+	STM14_0693	0	Intragenic	Sense
NC_016856.1_658008	658008	+	gene	656949	658124	+	STM14_0693	0	Intragenic	Sense
NC_016856.1_658378	658378	+	gene	658134	659744	+	STM14_0694	0	Intragenic	Sense
NC_016856.1_658792	658792	-	gene	658134	659744	+	STM14_0694	0	Intragenic	Antisense
NC_016856.1_660470	660470	-	gene	659758	660615	+	STM14_0695	0	Intragenic	Antisense
NC_016856.1_661322	661322	-	gene	660615	661370	+	STM14_0696	0	Intragenic	Antisense
NC_016856.1_661867	661867	+	gene	661373	661786	+	STM14_0697	-81	Intergenic	Sense
NC_016856.1_661892	661892	+	gene	661968	664073	+	STM14_0699	76	Intergenic	Sense
NC_016856.1_661900	661900	+	gene	661968	664073	+	STM14_0699	68	Intergenic	Sense
NC_016856.1_661909	661909	+	gene	661968	664073	+	STM14_0699	59	Intergenic	Sense
NC_016856.1_661920	661920	+	gene	661968	664073	+	STM14_0699	48	Intergenic	Sense
NC_016856.1_661929	661929	+	gene	661968	664073	+	STM14_0699	39	Intergenic	Sense
NC_016856.1_661979	661979	+	gene	661968	664073	+	STM14_0699	0	Intragenic	Sense
NC_016856.1_662045	662045	+	gene	661968	664073	+	STM14_0699	0	Intragenic	Sense
NC_016856.1_663345	663345	+	gene	661968	664073	+	STM14_0699	0	Intragenic	Sense
NC_016856.1_663686	663686	+	gene	661968	664073	+	STM14_0699	0	Intragenic	Sense
NC_016856.1_663833	663833	-	gene	661968	664073	+	STM14_0699	0	Intragenic	Antisense
NC_016856.1_663985	663985	+	gene	661968	664073	+	STM14_0699	0	Intragenic	Sense
NC_016856.1_664083	664083	+	gene	661968	664073	+	STM14_0699	-10	Intergenic	Sense
NC_016856.1_664230	664230	+	gene	664137	664334	+	STM14_0700	0	Intragenic	Sense
NC_016856.1_664605	664605	-	gene	664370	665458	-	STM14_0701	0	Intragenic	Sense
NC_016856.1_664912	664912	-	gene	664370	665458	-	STM14_0701	0	Intragenic	Sense
NC_016856.1_665521	665521	-	gene	664370	665458	-	STM14_0701	-63	Intergenic	Sense
NC_016856.1_666580	666580	+	gene	665585	666745	+	STM14_0702	0	Intragenic	Sense
NC_016856.1_666695	666695	+	gene	665585	666745	+	STM14_0702	0	Intragenic	Sense
NC_016856.1_666748	666748	+	gene	666746	667363	-	STM14_0703	0	Intragenic	Antisense
NC_016856.1_667268	667268	-	gene	666746	667363	-	STM14_0703	0	Intragenic	Sense
NC_016856.1_667637	667637	+	gene	667336	668571	-	STM14_0704	0	Intragenic	Antisense
NC_016856.1_667663	667663	+	gene	667336	668571	-	STM14_0704	0	Intragenic	Antisense
NC_016856.1_667953	667953	-	gene	667336	668571	-	STM14_0704	0	Intragenic	Sense
NC_016856.1_668594	668594	-	gene	667336	668571	-	STM14_0704	-23	Intergenic	Sense
NC_016856.1_668618	668618	-	gene	667336	668571	-	STM14_0704	-47	Intergenic	Sense
NC_016856.1_668997	668997	-	gene	668737	669639	-	STM14_0705	0	Intragenic	Sense
NC_016856.1_669668	669668	-	pseudogene	669564	669800	-	STM14_RS24485	0	Intragenic	Sense
NC_016856.1_669738	669738	-	pseudogene	669564	669800	-	STM14_RS24485	0	Intragenic	Sense
NC_016856.1_669757	669757	-	pseudogene	669564	669800	-	STM14_RS24485	0	Intragenic	Sense
NC_016856.1_670047	670047	+	gene	669956	670702	-	STM14_0706	0	Intragenic	Antisense
NC_016856.1_670480	670480	-	gene	669956	670702	-	STM14_0706	0	Intragenic	Sense
NC_016856.1_670598	670598	-	gene	669956	670702	-	STM14_0706	0	Intragenic	Sense
NC_016856.1_671119	671119	+	gene	671143	671706	+	STM14_0707	24	Intergenic	Sense
NC_016856.1_671129	671129	-	gene	671143	671706	+	STM14_0707	14	Intergenic	Antisense
NC_016856.1_671374	671374	+	gene	671143	671706	+	STM14_0707	0	Intragenic	Sense
NC_016856.1_671375	671375	-	gene	671143	671706	+	STM14_0707	0	Intragenic	Antisense
NC_016856.1_672103	672103	-	gene	671948	673513	+	STM14_0708	0	Intragenic	Antisense
NC_016856.1_672538	672538	+	gene	671948	673513	+	STM14_0708	0	Intragenic	Sense
NC_016856.1_672895	672895	-	gene	671948	673513	+	STM14_0708	0	Intragenic	Antisense
NC_016856.1_673014	673014	+	gene	671948	673513	+	STM14_0708	0	Intragenic	Sense
NC_016856.1_673165	673165	-	gene	671948	673513	+	STM14_0708	0	Intragenic	Antisense
NC_016856.1_673181	673181	+	gene	671948	673513	+	STM14_0708	0	Intragenic	Sense
NC_016856.1_673427	673427	-	gene	671948	673513	+	STM14_0708	0	Intragenic	Antisense
NC_016856.1_673585	673585	+	gene	671948	673513	+	STM14_0708	-72	Intergenic	Sense
NC_016856.1_674407	674407	+	gene	674398	676677	+	STM14_0710	0	Intragenic	Sense
NC_016856.1_674696	674696	+	gene	674398	676677	+	STM14_0710	0	Intragenic	Sense
NC_016856.1_676201	676201	-	gene	674398	676677	+	STM14_0710	0	Intragenic	Antisense
NC_016856.1_677468	677468	+	gene	677033	677800	+	STM14_0712	0	Intragenic	Sense
NC_016856.1_677783	677783	+	gene	677033	677800	+	STM14_0712	0	Intragenic	Sense
NC_016856.1_677867	677867	-	gene	677868	678296	-	STM14_0713	1	Intergenic	Sense
NC_016856.1_677878	677878	-	gene	677868	678296	-	STM14_0713	0	Intragenic	Sense
NC_016856.1_678029	678029	-	gene	677868	678296	-	STM14_0713	0	Intragenic	Sense
NC_016856.1_678278	678278	-	gene	677868	678296	-	STM14_0713	0	Intragenic	Sense
NC_016856.1_678278	678278	-	gene	678228	678434	+	STM14_0714	0	Intragenic	Antisense
NC_016856.1_678323	678323	-	gene	678228	678434	+	STM14_0714	0	Intragenic	Antisense
NC_016856.1_678333	678333	-	gene	678228	678434	+	STM14_0714	0	Intragenic	Antisense
NC_016856.1_678741	678741	+	gene	678519	679757	+	STM14_0716	0	Intragenic	Sense
NC_016856.1_680223	680223	-	gene	679840	680250	-	STM14_0717	0	Intragenic	Sense
NC_016856.1_680223	680223	-	gene	680200	680382	+	STM14_RS24495	0	Intragenic	Antisense
NC_016856.1_680338	680338	-	gene	680200	680382	+	STM14_RS24495	0	Intragenic	Antisense
NC_016856.1_680418	680418	-	gene	680200	680382	+	STM14_RS24495	-36	Intergenic	Antisense
NC_016856.1_680715	680715	-	gene	680485	681291	-	STM14_0718	0	Intragenic	Sense
NC_016856.1_681323	681323	-	gene	680485	681291	-	STM14_0718	-32	Intergenic	Sense
NC_016856.1_681448	681448	-	gene	681401	682864	-	STM14_0719	0	Intragenic	Sense
NC_016856.1_681555	681555	-	gene	681401	682864	-	STM14_0719	0	Intragenic	Sense
NC_016856.1_681578	681578	-	gene	681401	682864	-	STM14_0719	0	Intragenic	Sense
NC_016856.1_682904	682904	+	gene	682902	683798	-	STM14_0720	0	Intragenic	Antisense
NC_016856.1_685877	685877	+	gene	685864	686772	-	STM14_0723	0	Intragenic	Antisense
NC_016856.1_687021	687021	+	gene	686769	687065	-	STM14_0724	0	Intragenic	Antisense
NC_016856.1_689046	689046	+	gene	688523	690184	+	STM14_0727	0	Intragenic	Sense
NC_016856.1_689540	689540	+	gene	688523	690184	+	STM14_0727	0	Intragenic	Sense
NC_016856.1_690332	690332	+	gene	690153	690833	+	STM14_0728	0	Intragenic	Sense
NC_016856.1_690953	690953	-	gene	690887	692272	-	STM14_0729	0	Intragenic	Sense
NC_016856.1_690998	690998	-	gene	690887	692272	-	STM14_0729	0	Intragenic	Sense
NC_016856.1_692627	692627	+	gene	692651	693223	+	STM14_0731	24	Intergenic	Sense
NC_016856.1_692636	692636	+	gene	692651	693223	+	STM14_0731	15	Intergenic	Sense
NC_016856.1_693369	693369	+	gene	693411	693620	+	STM14_0732	42	Intergenic	Sense
NC_016856.1_693420	693420	+	gene	693411	693620	+	STM14_0732	0	Intragenic	Sense
NC_016856.1_693429	693429	+	gene	693411	693620	+	STM14_0732	0	Intragenic	Sense
NC_016856.1_693441	693441	+	gene	693411	693620	+	STM14_0732	0	Intragenic	Sense
NC_016856.1_693453	693453	+	gene	693411	693620	+	STM14_0732	0	Intragenic	Sense
NC_016856.1_693493	693493	+	gene	693411	693620	+	STM14_0732	0	Intragenic	Sense
NC_016856.1_693530	693530	+	gene	693411	693620	+	STM14_0732	0	Intragenic	Sense
NC_016856.1_693545	693545	+	gene	693411	693620	+	STM14_0732	0	Intragenic	Sense
NC_016856.1_693592	693592	+	gene	693411	693620	+	STM14_0732	0	Intragenic	Sense
NC_016856.1_693623	693623	+	gene	693411	693620	+	STM14_0732	-3	Intergenic	Sense
NC_016856.1_693787	693787	-	gene	693678	694061	-	STM14_0733	0	Intragenic	Sense
NC_016856.1_694088	694088	+	gene	693678	694061	-	STM14_0733	-27	Intergenic	Antisense
NC_016856.1_694089	694089	-	gene	693678	694061	-	STM14_0733	-28	Intergenic	Sense
NC_016856.1_694097	694097	+	gene	693678	694061	-	STM14_0733	-36	Intergenic	Antisense
NC_016856.1_694779	694779	+	gene	694152	694940	+	STM14_0734	0	Intragenic	Sense
NC_016856.1_694783	694783	+	gene	694152	694940	+	STM14_0734	0	Intragenic	Sense
NC_016856.1_694802	694802	+	gene	694152	694940	+	STM14_0734	0	Intragenic	Sense
NC_016856.1_694927	694927	-	gene	694152	694940	+	STM14_0734	0	Intragenic	Antisense
NC_016856.1_694995	694995	+	gene	694152	694940	+	STM14_0734	-55	Intergenic	Sense
NC_016856.1_695022	695022	+	gene	695069	695272	+	STM14_0736	47	Intergenic	Sense
NC_016856.1_695092	695092	+	gene	695069	695272	+	STM14_0736	0	Intragenic	Sense
NC_016856.1_696408	696408	-	gene	695358	696323	-	STM14_0737	-85	Intergenic	Sense
NC_016856.1_696479	696479	+	gene	696529	697482	-	STM14_0739	50	Intergenic	Antisense
NC_016856.1_696585	696585	-	gene	696529	697482	-	STM14_0739	0	Intragenic	Sense
NC_016856.1_696586	696586	-	gene	696529	697482	-	STM14_0739	0	Intragenic	Sense
NC_016856.1_696738	696738	-	gene	696529	697482	-	STM14_0739	0	Intragenic	Sense
NC_016856.1_696973	696973	+	gene	696529	697482	-	STM14_0739	0	Intragenic	Antisense
NC_016856.1_697283	697283	+	gene	696529	697482	-	STM14_0739	0	Intragenic	Antisense
NC_016856.1_697505	697505	-	gene	696529	697482	-	STM14_0739	-23	Intergenic	Sense
NC_016856.1_697543	697543	+	gene	696529	697482	-	STM14_0739	-61	Intergenic	Antisense
NC_016856.1_697688	697688	-	gene	697784	698425	-	STM14_0741	96	Intergenic	Sense
NC_016856.1_698358	698358	+	gene	697784	698425	-	STM14_0741	0	Intragenic	Antisense
NC_016856.1_698729	698729	-	gene	698525	698788	-	STM14_0743	0	Intragenic	Sense
NC_016856.1_698823	698823	-	gene	698525	698788	-	STM14_0743	-35	Intergenic	Sense
NC_016856.1_698851	698851	-	gene	698897	700108	-	STM14_0744	46	Intergenic	Sense
NC_016856.1_699088	699088	+	gene	698897	700108	-	STM14_0744	0	Intragenic	Antisense
NC_016856.1_699463	699463	-	gene	698897	700108	-	STM14_0744	0	Intragenic	Sense
NC_016856.1_700157	700157	-	gene	698897	700108	-	STM14_0744	-49	Intergenic	Sense
NC_016856.1_700217	700217	+	gene	700248	701393	-	STM14_0746	31	Intergenic	Antisense
NC_016856.1_701535	701535	-	gene	701404	702516	-	STM14_0747	0	Intragenic	Sense
NC_016856.1_704150	704150	-	gene	702519	704420	-	STM14_0748	0	Intragenic	Sense
NC_016856.1_705039	705039	-	gene	704922	705239	-	STM14_0750	0	Intragenic	Sense
NC_016856.1_705144	705144	+	gene	704922	705239	-	STM14_0750	0	Intragenic	Antisense
NC_016856.1_705153	705153	+	gene	704922	705239	-	STM14_0750	0	Intragenic	Antisense
NC_016856.1_705278	705278	+	gene	704922	705239	-	STM14_0750	-39	Intergenic	Antisense
NC_016856.1_705405	705405	-	gene	705568	706176	-	STM14_0751	163	Intergenic	Sense
NC_016856.1_706254	706254	+	gene	706273	707367	+	STM14_0752	19	Intergenic	Sense
NC_016856.1_706348	706348	-	gene	706273	707367	+	STM14_0752	0	Intragenic	Antisense
NC_016856.1_708490	708490	-	gene	707985	709016	-	STM14_0754	0	Intragenic	Sense
NC_016856.1_709171	709171	-	gene	709016	709606	-	STM14_0755	0	Intragenic	Sense
NC_016856.1_709631	709631	-	gene	709621	712203	-	STM14_0756	0	Intragenic	Sense
NC_016856.1_709666	709666	-	gene	709621	712203	-	STM14_0756	0	Intragenic	Sense
NC_016856.1_709685	709685	-	gene	709621	712203	-	STM14_0756	0	Intragenic	Sense
NC_016856.1_709686	709686	-	gene	709621	712203	-	STM14_0756	0	Intragenic	Sense
NC_016856.1_710990	710990	-	gene	709621	712203	-	STM14_0756	0	Intragenic	Sense
NC_016856.1_712162	712162	-	gene	709621	712203	-	STM14_0756	0	Intragenic	Sense
NC_016856.1_712265	712265	-	gene	709621	712203	-	STM14_0756	-62	Intergenic	Sense
NC_016856.1_712467	712467	+	gene	712440	712781	+	STM14_0757	0	Intragenic	Sense
NC_016856.1_713142	713142	+	gene	712798	713970	+	STM14_0758	0	Intragenic	Sense
NC_016856.1_714070	714070	+	gene	714020	714973	+	STM14_0759	0	Intragenic	Sense
NC_016856.1_714444	714444	+	gene	714020	714973	+	STM14_0759	0	Intragenic	Sense
NC_016856.1_714955	714955	+	gene	714020	714973	+	STM14_0759	0	Intragenic	Sense
NC_016856.1_715691	715691	-	gene	715041	716969	+	STM14_0760	0	Intragenic	Antisense
NC_016856.1_715734	715734	+	gene	715041	716969	+	STM14_0760	0	Intragenic	Sense
NC_016856.1_716297	716297	+	gene	715041	716969	+	STM14_0760	0	Intragenic	Sense
NC_016856.1_717020	717020	-	gene	717062	717535	+	STM14_0761	42	Intergenic	Antisense
NC_016856.1_717037	717037	+	gene	717062	717535	+	STM14_0761	25	Intergenic	Sense
NC_016856.1_717912	717912	-	gene	717574	718569	-	STM14_0762	0	Intragenic	Sense
NC_016856.1_718122	718122	-	gene	717574	718569	-	STM14_0762	0	Intragenic	Sense
NC_016856.1_718795	718795	+	gene	718694	719401	+	STM14_0763	0	Intragenic	Sense
NC_016856.1_719299	719299	+	gene	718694	719401	+	STM14_0763	0	Intragenic	Sense
NC_016856.1_722804	722804	+	gene	721536	723008	+	STM14_0766	0	Intragenic	Sense
NC_016856.1_723099	723099	-	gene	723030	724709	-	STM14_0767	0	Intragenic	Sense
NC_016856.1_725976	725976	+	gene	724785	726023	-	STM14_0768	0	Intragenic	Antisense
NC_016856.1_726037	726037	-	gene	724785	726023	-	STM14_0768	-14	Intergenic	Sense
NC_016856.1_726147	726147	-	gene	726055	726990	-	STM14_0769	0	Intragenic	Sense
NC_016856.1_727002	727002	+	gene	726055	726990	-	STM14_0769	-12	Intergenic	Antisense
NC_016856.1_727015	727015	-	gene	726055	726990	-	STM14_0769	-25	Intergenic	Sense
NC_016856.1_727149	727149	-	gene	727107	727832	-	STM14_0770	0	Intragenic	Sense
NC_016856.1_728321	728321	-	gene	727832	728506	-	STM14_0771	0	Intragenic	Sense
NC_016856.1_728498	728498	-	gene	727832	728506	-	STM14_0771	0	Intragenic	Sense
NC_016856.1_728955	728955	-	gene	728506	729246	-	STM14_0772	0	Intragenic	Sense
NC_016856.1_729351	729351	-	gene	729406	730332	-	STM14_0773	55	Intergenic	Sense
NC_016856.1_729413	729413	-	gene	729406	730332	-	STM14_0773	0	Intragenic	Sense
NC_016856.1_729425	729425	-	gene	729406	730332	-	STM14_0773	0	Intragenic	Sense
NC_016856.1_729463	729463	-	gene	729406	730332	-	STM14_0773	0	Intragenic	Sense
NC_016856.1_729500	729500	-	gene	729406	730332	-	STM14_0773	0	Intragenic	Sense
NC_016856.1_729875	729875	-	gene	729406	730332	-	STM14_0773	0	Intragenic	Sense
NC_016856.1_729976	729976	-	gene	729406	730332	-	STM14_0773	0	Intragenic	Sense
NC_016856.1_730401	730401	-	gene	730384	730596	+	STM14_0774	0	Intragenic	Antisense
NC_016856.1_730412	730412	-	gene	730384	730596	+	STM14_0774	0	Intragenic	Antisense
NC_016856.1_730577	730577	-	gene	730384	730596	+	STM14_0774	0	Intragenic	Antisense
NC_016856.1_730592	730592	+	gene	730384	730596	+	STM14_0774	0	Intragenic	Sense
NC_016856.1_730614	730614	+	gene	730384	730596	+	STM14_0774	-18	Intergenic	Sense
NC_016856.1_731028	731028	-	gene	730669	732207	-	STM14_0775	0	Intragenic	Sense
NC_016856.1_731080	731080	+	gene	730669	732207	-	STM14_0775	0	Intragenic	Antisense
NC_016856.1_731198	731198	-	gene	730669	732207	-	STM14_0775	0	Intragenic	Sense
NC_016856.1_731253	731253	+	gene	730669	732207	-	STM14_0775	0	Intragenic	Antisense
NC_016856.1_731259	731259	-	gene	730669	732207	-	STM14_0775	0	Intragenic	Sense
NC_016856.1_731343	731343	+	gene	730669	732207	-	STM14_0775	0	Intragenic	Antisense
NC_016856.1_731357	731357	+	gene	730669	732207	-	STM14_0775	0	Intragenic	Antisense
NC_016856.1_732275	732275	-	gene	732227	733105	-	STM14_0776	0	Intragenic	Sense
NC_016856.1_733079	733079	+	gene	732227	733105	-	STM14_0776	0	Intragenic	Antisense
NC_016856.1_733166	733166	+	gene	732227	733105	-	STM14_0776	-61	Intergenic	Antisense
NC_016856.1_733277	733277	-	gene	733263	733736	-	STM14_0778	0	Intragenic	Sense
NC_016856.1_733305	733305	-	gene	733263	733736	-	STM14_0778	0	Intragenic	Sense
NC_016856.1_733361	733361	-	gene	733263	733736	-	STM14_0778	0	Intragenic	Sense
NC_016856.1_734651	734651	+	gene	733733	734818	-	STM14_0779	0	Intragenic	Antisense
NC_016856.1_734783	734783	+	gene	733733	734818	-	STM14_0779	0	Intragenic	Antisense
NC_016856.1_734830	734830	-	gene	733733	734818	-	STM14_0779	-12	Intergenic	Sense
NC_016856.1_734870	734870	-	gene	733733	734818	-	STM14_0779	-52	Intergenic	Sense
NC_016856.1_734876	734876	+	gene	733733	734818	-	STM14_0779	-58	Intergenic	Antisense
NC_016856.1_734877	734877	+	gene	733733	734818	-	STM14_0779	-59	Intergenic	Antisense
NC_016856.1_735146	735146	-	gene	734984	736408	-	STM14_0781	0	Intragenic	Sense
NC_016856.1_735674	735674	+	gene	734984	736408	-	STM14_0781	0	Intragenic	Antisense
NC_016856.1_735940	735940	+	gene	734984	736408	-	STM14_0781	0	Intragenic	Antisense
NC_016856.1_736472	736472	-	gene	734984	736408	-	STM14_0781	-64	Intergenic	Sense
NC_016856.1_736529	736529	+	gene	736552	737727	+	STM14_0782	23	Intergenic	Sense
NC_016856.1_738028	738028	+	gene	737794	738369	-	STM14_0783	0	Intragenic	Antisense
NC_016856.1_738396	738396	-	gene	737794	738369	-	STM14_0783	-27	Intergenic	Sense
NC_016856.1_738579	738579	-	gene	738505	738579	-	STM14_0784	0	Intragenic	Sense
NC_016856.1_738697	738697	-	gene	738623	738697	-	STM14_0785	0	Intragenic	Sense
NC_016856.1_738910	738910	-	gene	738836	738910	-	STM14_0787	0	Intragenic	Sense
NC_016856.1_739020	739020	-	gene	738946	739020	-	STM14_0788	0	Intragenic	Sense
NC_016856.1_739128	739128	-	gene	739044	739128	-	STM14_0789	0	Intragenic	Sense
NC_016856.1_739245	739245	-	gene	739137	739213	-	STM14_0790	-32	Intergenic	Sense
NC_016856.1_739349	739349	-	gene	739436	741100	-	STM14_0792	87	Intergenic	Sense
NC_016856.1_739828	739828	-	gene	739436	741100	-	STM14_0792	0	Intragenic	Sense
NC_016856.1_741080	741080	-	gene	739436	741100	-	STM14_0792	0	Intragenic	Sense
NC_016856.1_741080	741080	-	pseudogene	741045	741291	-	STM14_RS24505	0	Intragenic	Sense
NC_016856.1_741142	741142	+	pseudogene	741045	741291	-	STM14_RS24505	0	Intragenic	Antisense
NC_016856.1_741145	741145	-	pseudogene	741045	741291	-	STM14_RS24505	0	Intragenic	Sense
NC_016856.1_742166	742166	-	gene	742189	743409	-	STM14_0794	23	Intergenic	Sense
NC_016856.1_743122	743122	+	gene	742189	743409	-	STM14_0794	0	Intragenic	Antisense
NC_016856.1_743682	743682	-	gene	743414	744568	-	STM14_0795	0	Intragenic	Sense
NC_016856.1_744076	744076	-	gene	743414	744568	-	STM14_0795	0	Intragenic	Sense
NC_016856.1_745030	745030	-	gene	744628	745428	-	STM14_0796	0	Intragenic	Sense
NC_016856.1_745141	745141	+	gene	744628	745428	-	STM14_0796	0	Intragenic	Antisense
NC_016856.1_745466	745466	-	gene	744628	745428	-	STM14_0796	-38	Intergenic	Sense
NC_016856.1_745516	745516	-	gene	744628	745428	-	STM14_0796	-88	Intergenic	Sense
NC_016856.1_745649	745649	+	gene	745755	747707	+	STM14_0798	106	Intergenic	Sense
NC_016856.1_747471	747471	+	gene	745755	747707	+	STM14_0798	0	Intragenic	Sense
NC_016856.1_747825	747825	+	gene	747918	749585	+	STM14_0799	93	Intergenic	Sense
NC_016856.1_747868	747868	-	gene	747918	749585	+	STM14_0799	50	Intergenic	Antisense
NC_016856.1_747869	747869	-	gene	747918	749585	+	STM14_0799	49	Intergenic	Antisense
NC_016856.1_747877	747877	-	gene	747918	749585	+	STM14_0799	41	Intergenic	Antisense
[truncated: 10,383 more rows]

## Sheet: TSS_SA
Dataset S4: TSS, revield in libraries of Salmonella infection
The TSS, its position and strand are listed in the first three columns.
The closest feature to each TSS, its start, stop, strand and id are listed in the columns 5-8.
Distance from TSS to first nucleotid in ORF of closest feature is presented in the column "Distance".
The columns "Position on gene" and "Orientation" indicate classification of TSS, according to closest genome feature.
TSS_id	position	strand of TSS	Closest feature	start	stop	strand of feature	Gene_id	Distance	Position on gene	Orientation
NC_016855.1_7	7	+	gene	94	378	+	STM14_5526	87	Inter	sense
NC_016855.1_1322	1322	+	gene	1333	1599	+	STM14_5528	11	Inter	sense
NC_016855.1_1577	1577	+	gene	1333	1599	+	STM14_5528	0	Intra	sense
NC_016855.1_1662	1662	+	gene	1722	1844	+	STM14_RS00025	60	Inter	sense
NC_016855.1_1831	1831	-	gene	1722	1844	+	STM14_RS00025	0	Intra	antisense
NC_016855.1_2162	2162	-	gene	1907	2788	+	STM14_5531	0	Intra	antisense
NC_016855.1_3192	3192	-	gene	2800	3015	+	STM14_RS24260	-177	Inter	antisense
NC_016855.1_3617	3617	-	gene	3690	3869	+	STM14_RS24265	73	Inter	antisense
NC_016855.1_4042	4042	+	gene	3966	4724	-	STM14_5533	0	Intra	antisense
NC_016855.1_4065	4065	+	gene	3966	4724	-	STM14_5533	0	Intra	antisense
NC_016855.1_4260	4260	-	gene	3966	4724	-	STM14_5533	0	Intra	sense
NC_016855.1_4936	4936	+	gene	4991	5548	-	STM14_5534	55	Inter	antisense
NC_016855.1_5083	5083	-	gene	4991	5548	-	STM14_5534	0	Intra	sense
NC_016855.1_6381	6381	+	gene	5638	6537	-	STM14_5535	0	Intra	antisense
NC_016855.1_8806	8806	+	gene	8547	9422	-	STM14_5539	0	Intra	antisense
NC_016855.1_8901	8901	+	gene	8547	9422	-	STM14_5539	0	Intra	antisense
NC_016855.1_9048	9048	-	gene	8547	9422	-	STM14_5539	0	Intra	sense
NC_016855.1_9225	9225	+	gene	8547	9422	-	STM14_5539	0	Intra	antisense
NC_016855.1_15554	15554	+	pseudogene	15382	15763	+	STM14_RS00100	0	Intra	sense
NC_016855.1_15737	15737	+	pseudogene	15382	15763	+	STM14_RS00100	0	Intra	sense
NC_016855.1_16673	16673	-	gene	16635	17624	-	STM14_5546	0	Intra	sense
NC_016855.1_17119	17119	-	gene	16635	17624	-	STM14_5546	0	Intra	sense
NC_016855.1_17120	17120	-	gene	16635	17624	-	STM14_5546	0	Intra	sense
NC_016855.1_17698	17698	-	gene	16635	17624	-	STM14_5546	-74	Inter	sense
NC_016855.1_17776	17776	-	gene	16635	17624	-	STM14_5546	-152	Inter	sense
NC_016855.1_17817	17817	-	gene	16635	17624	-	STM14_5546	-193	Inter	sense
NC_016855.1_17883	17883	+	gene	18118	18414	-	STM14_5548	235	Inter	antisense
NC_016855.1_18206	18206	+	gene	18118	18414	-	STM14_5548	0	Intra	antisense
NC_016855.1_19144	19144	+	gene	18898	19419	-	STM14_5549	0	Intra	antisense
NC_016855.1_19316	19316	-	gene	18898	19419	-	STM14_5549	0	Intra	sense
NC_016855.1_19433	19433	-	gene	18898	19419	-	STM14_5549	-14	Inter	sense
NC_016855.1_19751	19751	+	gene	18898	19419	-	STM14_5549	-332	Inter	antisense
NC_016855.1_22138	22138	-	gene	21465	22247	+	STM14_5554	0	Intra	antisense
NC_016855.1_22238	22238	+	gene	21465	22247	+	STM14_5554	0	Intra	sense
NC_016855.1_25665	25665	-	gene	25308	25658	-	STM14_5558	-7	Inter	sense
NC_016855.1_25680	25680	-	gene	25308	25658	-	STM14_5558	-22	Inter	sense
NC_016855.1_25772	25772	+	pseudogene	25715	26139	+	STM14_RS24290	0	Intra	sense
NC_016855.1_25800	25800	+	pseudogene	25715	26139	+	STM14_RS24290	0	Intra	sense
NC_016855.1_25811	25811	+	pseudogene	25715	26139	+	STM14_RS24290	0	Intra	sense
NC_016855.1_26222	26222	-	gene	26266	26916	-	STM14_5560	44	Inter	sense
NC_016855.1_30075	30075	+	gene	30140	30907	-	STM14_5563	65	Inter	antisense
NC_016855.1_31038	31038	+	gene	31081	31245	-	STM14_RS00205	43	Inter	antisense
NC_016855.1_31926	31926	+	gene	31419	32312	-	STM14_5564	0	Intra	antisense
NC_016855.1_34214	34214	-	gene	34147	35172	-	STM14_5566	0	Intra	sense
NC_016855.1_37321	37321	+	gene	36753	37313	-	STM14_5568	-8	Inter	antisense
NC_016855.1_37345	37345	-	gene	36753	37313	-	STM14_5568	-32	Inter	sense
NC_016855.1_37530	37530	+	gene	37520	38260	-	STM14_5569	0	Intra	antisense
NC_016855.1_37771	37771	-	gene	37520	38260	-	STM14_5569	0	Intra	sense
NC_016855.1_37783	37783	-	gene	37520	38260	-	STM14_5569	0	Intra	sense
NC_016855.1_38211	38211	-	gene	37520	38260	-	STM14_5569	0	Intra	sense
NC_016855.1_38293	38293	-	gene	37520	38260	-	STM14_5569	-33	Inter	sense
NC_016855.1_38343	38343	-	gene	37520	38260	-	STM14_5569	-83	Inter	sense
NC_016855.1_38796	38796	+	gene	38915	39403	-	STM14_5570	119	Inter	antisense
NC_016855.1_39160	39160	-	gene	38915	39403	-	STM14_5570	0	Intra	sense
NC_016855.1_39428	39428	-	gene	38915	39403	-	STM14_5570	-25	Inter	sense
NC_016855.1_39636	39636	+	gene	39662	40777	+	STM14_5571	26	Inter	sense
NC_016855.1_41704	41704	+	gene	41463	41798	+	STM14_RS00255	0	Intra	sense
NC_016855.1_41890	41890	+	pseudogene	41855	42456	+	STM14_RS00260	0	Intra	sense
NC_016855.1_42741	42741	-	gene	42453	43394	-	STM14_5574	0	Intra	sense
NC_016855.1_43417	43417	-	gene	42453	43394	-	STM14_5574	-23	Inter	sense
NC_016855.1_43787	43787	+	gene	43809	45014	+	STM14_5575	22	Inter	sense
NC_016855.1_43870	43870	-	gene	43809	45014	+	STM14_5575	0	Intra	antisense
NC_016855.1_44499	44499	+	gene	43809	45014	+	STM14_5575	0	Intra	sense
NC_016855.1_47795	47795	-	gene	47344	47766	-	STM14_5578	-29	Inter	sense
NC_016855.1_51698	51698	+	gene	50920	51684	+	STM14_5583	-14	Inter	sense
NC_016855.1_53325	53325	+	gene	53351	53674	+	STM14_5586	26	Inter	sense
NC_016855.1_55263	55263	-	gene	55259	57256	+	STM14_5589	0	Intra	antisense
NC_016855.1_55266	55266	-	gene	55259	57256	+	STM14_5589	0	Intra	antisense
NC_016855.1_57345	57345	+	gene	57296	57730	+	STM14_5590	0	Intra	sense
NC_016855.1_58591	58591	+	gene	57727	58464	+	STM14_5591	-127	Inter	sense
NC_016855.1_58966	58966	+	gene	58974	59243	+	STM14_RS00370	8	Inter	sense
NC_016855.1_60471	60471	-	gene	60103	60573	-	STM14_5592	0	Intra	sense
NC_016855.1_60472	60472	-	gene	60103	60573	-	STM14_5592	0	Intra	sense
NC_016855.1_60598	60598	-	gene	60103	60573	-	STM14_5592	-25	Inter	sense
NC_016855.1_61566	61566	-	gene	61561	62247	+	STM14_5595	0	Intra	antisense
NC_016855.1_66519	66519	+	gene	66024	66620	+	STM14_5602	0	Intra	sense
NC_016855.1_67442	67442	+	gene	67490	67711	+	STM14_5605	48	Inter	sense
NC_016855.1_69431	69431	+	gene	68567	71215	+	STM14_5607	0	Intra	sense
NC_016855.1_79534	79534	-	gene	78442	79824	+	STM14_5618	0	Intra	antisense
NC_016855.1_80270	80270	-	gene	79821	82643	+	STM14_5619	0	Intra	antisense
NC_016855.1_80652	80652	+	gene	79821	82643	+	STM14_5619	0	Intra	sense
NC_016855.1_82434	82434	+	gene	79821	82643	+	STM14_5619	0	Intra	sense
NC_016855.1_82451	82451	+	gene	79821	82643	+	STM14_5619	0	Intra	sense
NC_016855.1_82552	82552	+	gene	79821	82643	+	STM14_5619	0	Intra	sense
NC_016855.1_84371	84371	-	gene	84297	86459	+	STM14_5622	0	Intra	antisense
NC_016855.1_84888	84888	+	gene	84297	86459	+	STM14_5622	0	Intra	sense
NC_016855.1_84960	84960	-	gene	84297	86459	+	STM14_5622	0	Intra	antisense
NC_016855.1_87125	87125	-	gene	86866	87096	-	STM14_5625	-29	Inter	sense
NC_016855.1_87934	87934	+	gene	87175	92433	+	STM14_5626	0	Intra	sense
NC_016855.1_90099	90099	-	gene	87175	92433	+	STM14_5626	0	Intra	antisense
NC_016855.1_93216	93216	+	gene	92453	93193	+	STM14_5627	-23	Inter	sense
NC_016856.1_139	139	+	gene	190	255	+	STM14_0001	51	Inter	sense
NC_016856.1_148	148	+	gene	190	255	+	STM14_0001	42	Inter	sense
NC_016856.1_1393	1393	-	gene	337	2799	+	STM14_0002	0	Intra	antisense
NC_016856.1_1618	1618	+	gene	337	2799	+	STM14_0002	0	Intra	sense
NC_016856.1_5353	5353	-	gene	5114	5887	-	STM14_0005	0	Intra	sense
NC_016856.1_5910	5910	-	gene	5114	5887	-	STM14_0005	-23	Inter	sense
NC_016856.1_7444	7444	+	gene	5966	7396	-	STM14_0006	-48	Inter	antisense
NC_016856.1_7483	7483	-	gene	5966	7396	-	STM14_0006	-87	Inter	sense
NC_016856.1_7619	7619	+	gene	7665	8618	+	STM14_0007	46	Inter	sense
NC_016856.1_8703	8703	+	gene	8729	9319	+	STM14_0008	26	Inter	sense
NC_016856.1_9971	9971	+	gene	9376	9942	-	STM14_0009	-29	Inter	antisense
NC_016856.1_10027	10027	+	gene	10092	10805	-	STM14_0010	65	Inter	antisense
NC_016856.1_11277	11277	-	gene	10841	11245	-	STM14_0011	-32	Inter	sense
NC_016856.1_11479	11479	+	gene	11593	13509	+	STM14_0013	114	Inter	sense
NC_016856.1_11553	11553	+	gene	11593	13509	+	STM14_0013	40	Inter	sense
NC_016856.1_12438	12438	-	gene	11593	13509	+	STM14_0013	0	Intra	antisense
NC_016856.1_12440	12440	-	gene	11593	13509	+	STM14_0013	0	Intra	antisense
NC_016856.1_16493	16493	-	gene	16493	17026	-	STM14_0018	0	Intra	sense
NC_016856.1_22968	22968	+	gene	20058	23054	+	STM14_0023	0	Intra	sense
NC_016856.1_25324	25324	-	gene	25112	25798	+	STM14_0029	0	Intra	antisense
NC_016856.1_27254	27254	-	gene	25803	28424	+	STM14_0030	0	Intra	antisense
NC_016856.1_27666	27666	+	gene	25803	28424	+	STM14_0030	0	Intra	sense
NC_016856.1_28821	28821	+	gene	28425	29432	+	STM14_0031	0	Intra	sense
NC_016856.1_36823	36823	-	gene	35339	37057	+	STM14_0041	0	Intra	antisense
NC_016856.1_40731	40731	+	gene	40131	41624	+	STM14_0044	0	Intra	sense
NC_016856.1_41789	41789	+	gene	41723	42913	+	STM14_0045	0	Intra	sense
NC_016856.1_41857	41857	+	gene	41723	42913	+	STM14_0045	0	Intra	sense
NC_016856.1_42801	42801	-	gene	41723	42913	+	STM14_0045	0	Intra	antisense
NC_016856.1_44204	44204	+	gene	42932	44185	+	STM14_0046	-19	Inter	sense
NC_016856.1_45029	45029	-	gene	44312	46027	+	STM14_0047	0	Intra	antisense
NC_016856.1_45888	45888	+	gene	44312	46027	+	STM14_0047	0	Intra	sense
NC_016856.1_45977	45977	-	gene	44312	46027	+	STM14_0047	0	Intra	antisense
NC_016856.1_46043	46043	+	gene	44312	46027	+	STM14_0047	-16	Inter	sense
NC_016856.1_46156	46156	+	gene	46190	47356	+	STM14_0048	34	Inter	sense
NC_016856.1_47913	47913	+	gene	47418	48317	+	STM14_0049	0	Intra	sense
NC_016856.1_51492	51492	+	gene	50451	51824	-	STM14_0051	0	Intra	antisense
NC_016856.1_52094	52094	+	gene	52280	52543	-	STM14_0052	186	Inter	antisense
NC_016856.1_52114	52114	+	gene	52280	52543	-	STM14_0052	166	Inter	antisense
NC_016856.1_52472	52472	+	gene	52280	52543	-	STM14_0052	0	Intra	antisense
NC_016856.1_52582	52582	-	gene	52280	52543	-	STM14_0052	-39	Inter	sense
NC_016856.1_52583	52583	-	gene	52280	52543	-	STM14_0052	-40	Inter	sense
NC_016856.1_52672	52672	-	gene	52649	52864	+	STM14_0053	0	Intra	antisense
NC_016856.1_52849	52849	+	gene	52649	52864	+	STM14_0053	0	Intra	sense
NC_016856.1_56399	56399	+	gene	53855	56689	+	STM14_0055	0	Intra	sense
NC_016856.1_56528	56528	+	gene	53855	56689	+	STM14_0055	0	Intra	sense
NC_016856.1_61807	61807	+	gene	61794	63413	-	STM14_0063	0	Intra	antisense
NC_016856.1_62202	62202	-	gene	61794	63413	-	STM14_0063	0	Intra	sense
NC_016856.1_62908	62908	-	gene	61794	63413	-	STM14_0063	0	Intra	sense
NC_016856.1_63116	63116	-	gene	61794	63413	-	STM14_0063	0	Intra	sense
NC_016856.1_73931	73931	+	gene	74017	74838	+	STM14_0075	86	Inter	sense
NC_016856.1_74844	74844	+	gene	74017	74838	+	STM14_0075	-6	Inter	sense
NC_016856.1_74851	74851	+	gene	74017	74838	+	STM14_0075	-13	Inter	sense
NC_016856.1_75012	75012	-	pseudogene	75088	75436	+	STM14_RS25810	76	Inter	antisense
NC_016856.1_75851	75851	+	gene	75881	77029	+	STM14_0077	30	Inter	sense
NC_016856.1_80287	80287	+	gene	77048	80275	+	STM14_0078	-12	Inter	sense
NC_016856.1_81179	81179	+	pseudogene	80994	81178	-	STM14_RS24335	-1	Inter	antisense
NC_016856.1_81278	81278	+	gene	81260	81655	+	STM14_0081	0	Intra	sense
NC_016856.1_84700	84700	-	gene	83276	84829	-	STM14_0084	0	Intra	sense
NC_016856.1_94834	94834	+	gene	94843	95259	+	STM14_0096	9	Inter	sense
NC_016856.1_95022	95022	+	gene	94843	95259	+	STM14_0096	0	Intra	sense
NC_016856.1_98461	98461	+	gene	96671	98560	+	STM14_0100	0	Intra	sense
NC_016856.1_98892	98892	-	pseudogene	98765	98845	-	STM14_RS25820	-47	Inter	sense
NC_016856.1_98941	98941	+	gene	98967	99497	+	STM14_0103	26	Inter	sense
NC_016856.1_101356	101356	+	gene	99490	101352	+	STM14_0104	-4	Inter	sense
NC_016856.1_101490	101490	-	gene	101551	102030	+	STM14_0106	61	Inter	antisense
NC_016856.1_101524	101524	+	gene	101551	102030	+	STM14_0106	27	Inter	sense
NC_016856.1_101554	101554	+	gene	101551	102030	+	STM14_0106	0	Intra	sense
NC_016856.1_103764	103764	-	gene	103375	104196	-	STM14_0109	0	Intra	sense
NC_016856.1_103800	103800	-	gene	103375	104196	-	STM14_0109	0	Intra	sense
NC_016856.1_104353	104353	-	gene	104193	105182	-	STM14_0110	0	Intra	sense
NC_016856.1_107125	107125	-	gene	106522	108882	-	STM14_0112	0	Intra	sense
NC_016856.1_108559	108559	+	gene	106522	108882	-	STM14_0112	0	Intra	antisense
NC_016856.1_109013	109013	-	gene	109136	109948	+	STM14_0114	123	Inter	antisense
NC_016856.1_109344	109344	+	gene	109136	109948	+	STM14_0114	0	Intra	sense
NC_016856.1_110597	110597	-	gene	110043	110702	-	STM14_0115	0	Intra	sense
NC_016856.1_112703	112703	-	gene	110714	113620	-	STM14_0116	0	Intra	sense
NC_016856.1_113814	113814	-	gene	113794	116145	-	STM14_0117	0	Intra	sense
NC_016856.1_116837	116837	-	pseudogene	116739	117050	-	STM14_RS24340	0	Intra	sense
NC_016856.1_122175	122175	+	gene	120302	122011	-	STM14_0122	-164	Inter	antisense
NC_016856.1_122184	122184	+	gene	122352	123197	+	STM14_0123	168	Inter	sense
NC_016856.1_123236	123236	+	gene	122352	123197	+	STM14_0123	-39	Inter	sense
NC_016856.1_127511	127511	-	riboswitch	127414	127513	-	ID=id1;Dbxref=RFAM:RF00059;Note=TPP	riboswitch;bound_moiety=thiamine	Inter	sense
NC_016856.1_128134	128134	+	gene	127560	129218	-	STM14_0129	0	Intra	antisense
NC_016856.1_129286	129286	+	gene	129311	129433	+	STM14_RS01125	25	Inter	sense
NC_016856.1_134650	134650	-	gene	134538	134624	-	STM14_0135	-26	Inter	sense
NC_016856.1_135071	135071	+	gene	135281	136225	+	STM14_0138	210	Inter	sense
NC_016856.1_136155	136155	+	gene	135281	136225	+	STM14_0138	0	Intra	sense
NC_016856.1_136512	136512	+	gene	136520	138271	+	STM14_0139	8	Inter	sense
NC_016856.1_136540	136540	+	gene	136520	138271	+	STM14_0139	0	Intra	sense
NC_016856.1_137905	137905	+	gene	136520	138271	+	STM14_0139	0	Intra	sense
NC_016856.1_138990	138990	+	gene	139049	140053	+	STM14_0142	59	Inter	sense
NC_016856.1_140615	140615	+	gene	140659	141117	+	STM14_0145	44	Inter	sense
NC_016856.1_140650	140650	+	gene	140659	141117	+	STM14_0145	9	Inter	sense
NC_016856.1_147116	147116	+	gene	147027	148109	+	STM14_0151	0	Intra	sense
NC_016856.1_148153	148153	+	gene	148112	149428	+	STM14_0152	0	Intra	sense
NC_016856.1_152313	152313	+	gene	151855	153330	+	STM14_0155	0	Intra	sense
NC_016856.1_153538	153538	+	gene	153323	154243	+	STM14_0156	0	Intra	sense
NC_016856.1_153851	153851	+	gene	153323	154243	+	STM14_0156	0	Intra	sense
NC_016856.1_153862	153862	+	gene	153323	154243	+	STM14_0156	0	Intra	sense
NC_016856.1_154651	154651	+	gene	154245	155075	+	STM14_0157	0	Intra	sense
NC_016856.1_155355	155355	+	gene	155072	156334	+	STM14_0158	0	Intra	sense
NC_016856.1_155597	155597	+	gene	155072	156334	+	STM14_0158	0	Intra	sense
NC_016856.1_155630	155630	+	gene	155072	156334	+	STM14_0158	0	Intra	sense
NC_016856.1_157598	157598	+	gene	157647	158564	+	STM14_0160	49	Inter	sense
NC_016856.1_157620	157620	+	gene	157647	158564	+	STM14_0160	27	Inter	sense
NC_016856.1_157836	157836	+	gene	157647	158564	+	STM14_0160	0	Intra	sense
NC_016856.1_158777	158777	+	gene	158816	159340	+	STM14_0161	39	Inter	sense
NC_016856.1_158790	158790	+	gene	158816	159340	+	STM14_0161	26	Inter	sense
NC_016856.1_158837	158837	+	gene	158816	159340	+	STM14_0161	0	Intra	sense
NC_016856.1_161228	161228	+	gene	159402	162107	+	STM14_0162	0	Intra	sense
NC_016856.1_163215	163215	-	gene	163177	163920	-	STM14_0167	0	Intra	sense
NC_016856.1_164644	164644	-	gene	163920	164540	-	STM14_0168	-104	Inter	sense
NC_016856.1_164697	164697	-	gene	164766	165809	+	STM14_0169	69	Inter	antisense
NC_016856.1_164716	164716	+	gene	164766	165809	+	STM14_0169	50	Inter	sense
NC_016856.1_170013	170013	-	gene	169086	169979	-	STM14_0174	-34	Inter	sense
NC_016856.1_173072	173072	-	gene	172523	173929	-	STM14_0178	0	Intra	sense
NC_016856.1_174027	174027	+	gene	174093	175463	-	STM14_0180	66	Inter	antisense
NC_016856.1_175610	175610	-	gene	174093	175463	-	STM14_0180	-147	Inter	sense
NC_016856.1_175970	175970	+	gene	176029	176793	+	STM14_0182	59	Inter	sense
NC_016856.1_176180	176180	-	gene	176029	176793	+	STM14_0182	0	Intra	antisense
NC_016856.1_177306	177306	-	gene	176953	179616	+	STM14_0183	0	Intra	antisense
NC_016856.1_178450	178450	+	gene	176953	179616	+	STM14_0183	0	Intra	sense
NC_016856.1_181649	181649	+	gene	181720	183144	+	STM14_0185	71	Inter	sense
NC_016856.1_186427	186427	+	gene	186562	189159	+	STM14_0190	135	Inter	sense
NC_016856.1_186431	186431	+	gene	186562	189159	+	STM14_0190	131	Inter	sense
NC_016856.1_186452	186452	+	gene	186562	189159	+	STM14_0190	110	Inter	sense
NC_016856.1_188892	188892	+	gene	186562	189159	+	STM14_0190	0	Intra	sense
NC_016856.1_190098	190098	+	gene	189220	190062	-	STM14_0191	-36	Inter	antisense
NC_016856.1_190144	190144	+	gene	189220	190062	-	STM14_0191	-82	Inter	antisense
NC_016856.1_190152	190152	+	gene	189220	190062	-	STM14_0191	-90	Inter	antisense
NC_016856.1_190262	190262	+	gene	190308	190670	+	STM14_0192	46	Inter	sense
NC_016856.1_190277	190277	+	gene	190308	190670	+	STM14_0192	31	Inter	sense
NC_016856.1_194069	194069	+	gene	193116	194099	+	STM14_0195	0	Intra	sense
NC_016856.1_197031	197031	-	gene	196688	197035	-	STM14_0199	0	Intra	sense
NC_016856.1_197058	197058	-	gene	196688	197035	-	STM14_0199	-23	Inter	sense
NC_016856.1_197149	197149	+	gene	197237	198847	+	STM14_0200	88	Inter	sense
NC_016856.1_201740	201740	+	gene	201521	202057	+	STM14_0202	0	Intra	sense
NC_016856.1_202011	202011	+	gene	201521	202057	+	STM14_0202	0	Intra	sense
NC_016856.1_202045	202045	+	gene	201521	202057	+	STM14_0202	0	Intra	sense
NC_016856.1_202750	202750	-	gene	202115	202777	-	STM14_0203	0	Intra	sense
NC_016856.1_202810	202810	-	gene	202115	202777	-	STM14_0203	-33	Inter	sense
NC_016856.1_209965	209965	+	gene	209997	210437	+	STM14_0211	32	Inter	sense
NC_016856.1_210475	210475	+	gene	210499	211728	+	STM14_0212	24	Inter	sense
NC_016856.1_210511	210511	+	gene	210499	211728	+	STM14_0212	0	Intra	sense
NC_016856.1_212177	212177	-	pseudogene	212053	212234	+	STM14_RS24360	0	Intra	antisense
NC_016856.1_212929	212929	-	gene	212210	213064	-	STM14_0214	0	Intra	sense
NC_016856.1_216123	216123	-	gene	216137	217033	-	STM14_0219	14	Inter	sense
NC_016856.1_217607	217607	-	gene	217102	217557	-	STM14_0220	-50	Inter	sense
NC_016856.1_217840	217840	-	gene	217734	218438	-	STM14_0221	0	Intra	sense
NC_016856.1_218030	218030	-	gene	217734	218438	-	STM14_0221	0	Intra	sense
NC_016856.1_219006	219006	-	gene	219013	221487	+	STM14_0223	7	Inter	antisense
NC_016856.1_219030	219030	+	gene	219013	221487	+	STM14_0223	0	Intra	sense
NC_016856.1_223567	223567	+	gene	221628	224150	+	STM14_0226	0	Intra	sense
NC_016856.1_224384	224384	-	gene	224443	226632	+	STM14_0228	59	Inter	antisense
NC_016856.1_224388	224388	+	gene	224443	226632	+	STM14_0228	55	Inter	sense
NC_016856.1_224693	224693	-	gene	224443	226632	+	STM14_0228	0	Intra	antisense
NC_016856.1_225607	225607	+	gene	224443	226632	+	STM14_0228	0	Intra	sense
NC_016856.1_226267	226267	+	gene	224443	226632	+	STM14_0228	0	Intra	sense
NC_016856.1_231994	231994	+	gene	232007	234664	+	STM14_0235	13	Inter	sense
NC_016856.1_233263	233263	+	gene	232007	234664	+	STM14_0235	0	Intra	sense
NC_016856.1_236976	236976	+	gene	236968	237807	+	STM14_0240	0	Intra	sense
NC_016856.1_237777	237777	-	gene	236968	237807	+	STM14_0240	0	Intra	antisense
NC_016856.1_237799	237799	+	gene	236968	237807	+	STM14_0240	0	Intra	sense
NC_016856.1_238090	238090	-	gene	237915	239195	-	STM14_0241	0	Intra	sense
NC_016856.1_239227	239227	-	gene	237915	239195	-	STM14_0241	-32	Inter	sense
NC_016856.1_240285	240285	+	gene	239365	240786	+	STM14_0243	0	Intra	sense
NC_016856.1_240819	240819	+	gene	239365	240786	+	STM14_0243	-33	Inter	sense
NC_016856.1_240874	240874	+	gene	240868	241212	+	STM14_0244	0	Intra	sense
NC_016856.1_241719	241719	+	gene	241313	241936	-	STM14_0245	0	Intra	antisense
NC_016856.1_244263	244263	+	gene	243549	245066	+	STM14_0248	0	Intra	sense
NC_016856.1_244368	244368	+	gene	243549	245066	+	STM14_0248	0	Intra	sense
NC_016856.1_244422	244422	-	gene	243549	245066	+	STM14_0248	0	Intra	antisense
NC_016856.1_245149	245149	+	gene	245196	246623	+	STM14_0249	47	Inter	sense
NC_016856.1_245156	245156	+	gene	245196	246623	+	STM14_0249	40	Inter	sense
NC_016856.1_245664	245664	+	gene	245196	246623	+	STM14_0249	0	Intra	sense
NC_016856.1_246555	246555	+	gene	245196	246623	+	STM14_0249	0	Intra	sense
NC_016856.1_248202	248202	-	gene	248022	248408	-	STM14_0251	0	Intra	sense
NC_016856.1_248434	248434	-	gene	248022	248408	-	STM14_0251	-26	Inter	sense
NC_016856.1_249863	249863	+	pseudogene	248655	249957	+	STM14_0252	0	Intra	sense
NC_016856.1_250846	250846	-	gene	250848	253520	-	STM14_0254	2	Inter	sense
NC_016856.1_253828	253828	-	gene	253608	253856	+	STM14_RS25825	0	Intra	antisense
NC_016856.1_253828	253828	-	gene	253757	254551	-	STM14_0255	0	Intra	sense
NC_016856.1_253829	253829	-	gene	253608	253856	+	STM14_RS25825	0	Intra	antisense
NC_016856.1_253829	253829	-	gene	253757	254551	-	STM14_0255	0	Intra	sense
NC_016856.1_254596	254596	+	pseudogene	254554	254850	-	STM14_RS25830	0	Intra	antisense
NC_016856.1_254597	254597	+	pseudogene	254554	254850	-	STM14_RS25830	0	Intra	antisense
NC_016856.1_254598	254598	-	pseudogene	254554	254850	-	STM14_RS25830	0	Intra	sense
NC_016856.1_254836	254836	+	pseudogene	254554	254850	-	STM14_RS25830	0	Intra	antisense
NC_016856.1_255569	255569	+	gene	255002	255727	+	STM14_0257	0	Intra	sense
NC_016856.1_256231	256231	+	gene	255985	256836	+	STM14_0258	0	Intra	sense
NC_016856.1_256378	256378	+	gene	255985	256836	+	STM14_0258	0	Intra	sense
NC_016856.1_256938	256938	+	gene	256981	257706	+	STM14_0259	43	Inter	sense
NC_016856.1_257744	257744	+	gene	256981	257706	+	STM14_0259	-38	Inter	sense
NC_016856.1_257780	257780	+	gene	257853	258410	+	STM14_0260	73	Inter	sense
NC_016856.1_257795	257795	+	gene	257853	258410	+	STM14_0260	58	Inter	sense
NC_016856.1_257840	257840	+	gene	257853	258410	+	STM14_0260	13	Inter	sense
NC_016856.1_257981	257981	+	gene	257853	258410	+	STM14_0260	0	Intra	sense
NC_016856.1_258500	258500	+	gene	258551	259747	+	STM14_0261	51	Inter	sense
NC_016856.1_259794	259794	+	gene	259830	260033	+	STM14_0262	36	Inter	sense
NC_016856.1_262180	262180	+	gene	261700	263052	+	STM14_0265	0	Intra	sense
NC_016856.1_262341	262341	+	gene	261700	263052	+	STM14_0265	0	Intra	sense
NC_016856.1_262507	262507	+	gene	261700	263052	+	STM14_0265	0	Intra	sense
NC_016856.1_265118	265118	+	gene	263084	265498	+	STM14_0266	0	Intra	sense
NC_016856.1_265134	265134	+	gene	263084	265498	+	STM14_0266	0	Intra	sense
NC_016856.1_265765	265765	+	gene	265621	266106	+	STM14_0267	0	Intra	sense
NC_016856.1_266515	266515	+	gene	266110	267135	+	STM14_0268	0	Intra	sense
NC_016856.1_266854	266854	+	gene	266110	267135	+	STM14_0268	0	Intra	sense
NC_016856.1_267212	267212	+	gene	267241	267696	+	STM14_0269	29	Inter	sense
NC_016856.1_267250	267250	+	gene	267241	267696	+	STM14_0269	0	Intra	sense
NC_016856.1_270307	270307	+	gene	270253	273735	+	STM14_0273	0	Intra	sense
NC_016856.1_270958	270958	-	gene	270253	273735	+	STM14_0273	0	Intra	antisense
NC_016856.1_273403	273403	+	gene	270253	273735	+	STM14_0273	0	Intra	sense
NC_016856.1_273539	273539	+	gene	270253	273735	+	STM14_0273	0	Intra	sense
NC_016856.1_275702	275702	+	gene	274887	276650	+	STM14_0275	0	Intra	sense
NC_016856.1_276706	276706	+	gene	276726	278867	+	STM14_0276	20	Inter	sense
NC_016856.1_277450	277450	+	gene	276726	278867	+	STM14_0276	0	Intra	sense
NC_016856.1_279013	279013	+	gene	278923	279312	+	STM14_0277	0	Intra	sense
NC_016856.1_279351	279351	+	gene	279375	280667	+	STM14_0278	24	Inter	sense
NC_016856.1_280487	280487	+	gene	279375	280667	+	STM14_0278	0	Intra	sense
NC_016856.1_280911	280911	-	gene	280751	281011	-	STM14_0279	0	Intra	sense
NC_016856.1_280922	280922	-	gene	280751	281011	-	STM14_0279	0	Intra	sense
NC_016856.1_281208	281208	-	gene	280998	281216	-	STM14_0280	0	Intra	sense
NC_016856.1_281236	281236	-	gene	280998	281216	-	STM14_0280	-20	Inter	sense
NC_016856.1_281270	281270	-	gene	280998	281216	-	STM14_0280	-54	Inter	sense
NC_016856.1_282380	282380	-	gene	282392	283093	+	STM14_0283	12	Inter	antisense
NC_016856.1_283184	283184	-	gene	283167	284885	-	STM14_0284	0	Intra	sense
NC_016856.1_284946	284946	-	gene	284996	285703	-	STM14_0285	50	Inter	sense
NC_016856.1_285097	285097	-	gene	284996	285703	-	STM14_0285	0	Intra	sense
NC_016856.1_286131	286131	-	gene	285700	286104	-	STM14_0286	-27	Inter	sense
NC_016856.1_286296	286296	-	gene	286223	287038	-	STM14_0287	0	Intra	sense
NC_016856.1_286376	286376	-	gene	286223	287038	-	STM14_0287	0	Intra	sense
NC_016856.1_287116	287116	-	gene	287077	287730	-	STM14_0288	0	Intra	sense
NC_016856.1_287160	287160	-	gene	287077	287730	-	STM14_0288	0	Intra	sense
NC_016856.1_287169	287169	-	gene	287077	287730	-	STM14_0288	0	Intra	sense
NC_016856.1_287178	287178	-	gene	287077	287730	-	STM14_0288	0	Intra	sense
NC_016856.1_288492	288492	+	gene	287723	288754	-	STM14_0289	0	Intra	antisense
NC_016856.1_288541	288541	+	gene	287723	288754	-	STM14_0289	0	Intra	antisense
NC_016856.1_288824	288824	-	gene	287723	288754	-	STM14_0289	-70	Inter	sense
NC_016856.1_289596	289596	+	gene	289611	289832	+	STM14_RS25835	15	Inter	sense
NC_016856.1_289702	289702	+	gene	289611	289832	+	STM14_RS25835	0	Intra	sense
NC_016856.1_289764	289764	+	gene	289611	289832	+	STM14_RS25835	0	Intra	sense
NC_016856.1_289843	289843	-	gene	289611	289832	+	STM14_RS25835	-11	Inter	antisense
NC_016856.1_289879	289879	+	gene	289877	291432	+	STM14_0293	0	Intra	sense
NC_016856.1_289933	289933	+	gene	289877	291432	+	STM14_0293	0	Intra	sense
NC_016856.1_289979	289979	+	gene	289877	291432	+	STM14_0293	0	Intra	sense
NC_016856.1_290203	290203	+	gene	289877	291432	+	STM14_0293	0	Intra	sense
NC_016856.1_290516	290516	+	gene	289877	291432	+	STM14_0293	0	Intra	sense
NC_016856.1_290576	290576	+	gene	289877	291432	+	STM14_0293	0	Intra	sense
NC_016856.1_290724	290724	+	gene	289877	291432	+	STM14_0293	0	Intra	sense
NC_016856.1_290910	290910	+	gene	289877	291432	+	STM14_0293	0	Intra	sense
NC_016856.1_291015	291015	+	gene	289877	291432	+	STM14_0293	0	Intra	sense
NC_016856.1_291045	291045	+	gene	289877	291432	+	STM14_0293	0	Intra	sense
NC_016856.1_291332	291332	+	gene	289877	291432	+	STM14_0293	0	Intra	sense
NC_016856.1_291350	291350	+	gene	289877	291432	+	STM14_0293	0	Intra	sense
NC_016856.1_291454	291454	+	gene	289877	291432	+	STM14_0293	-22	Inter	sense
NC_016856.1_291490	291490	+	gene	291490	291566	+	STM14_0294	0	Intra	sense
NC_016856.1_291676	291676	+	gene	291676	291751	+	STM14_0295	0	Intra	sense
NC_016856.1_291811	291811	+	gene	291676	291751	+	STM14_0295	-60	Inter	sense
NC_016856.1_291934	291934	+	gene	291925	295036	+	STM14_0297	0	Intra	sense
NC_016856.1_291983	291983	+	gene	291925	295036	+	STM14_0297	0	Intra	sense
NC_016856.1_292109	292109	+	gene	291925	295036	+	STM14_0297	0	Intra	sense
NC_016856.1_292225	292225	+	gene	291925	295036	+	STM14_0297	0	Intra	sense
NC_016856.1_292285	292285	+	gene	291925	295036	+	STM14_0297	0	Intra	sense
NC_016856.1_292286	292286	+	gene	291925	295036	+	STM14_0297	0	Intra	sense
NC_016856.1_292296	292296	+	gene	291925	295036	+	STM14_0297	0	Intra	sense
NC_016856.1_292317	292317	+	gene	291925	295036	+	STM14_0297	0	Intra	sense
NC_016856.1_292318	292318	+	gene	291925	295036	+	STM14_0297	0	Intra	sense
NC_016856.1_292430	292430	+	gene	291925	295036	+	STM14_0297	0	Intra	sense
NC_016856.1_292432	292432	+	gene	291925	295036	+	STM14_0297	0	Intra	sense
NC_016856.1_292581	292581	+	gene	291925	295036	+	STM14_0297	0	Intra	sense
NC_016856.1_292879	292879	+	gene	291925	295036	+	STM14_0297	0	Intra	sense
NC_016856.1_293291	293291	+	gene	291925	295036	+	STM14_0297	0	Intra	sense
NC_016856.1_293540	293540	+	gene	291925	295036	+	STM14_0297	0	Intra	sense
NC_016856.1_293630	293630	+	gene	291925	295036	+	STM14_0297	0	Intra	sense
NC_016856.1_293655	293655	+	gene	291925	295036	+	STM14_0297	0	Intra	sense
NC_016856.1_293761	293761	+	gene	291925	295036	+	STM14_0297	0	Intra	sense
NC_016856.1_293768	293768	+	gene	291925	295036	+	STM14_0297	0	Intra	sense
NC_016856.1_293930	293930	+	gene	291925	295036	+	STM14_0297	0	Intra	sense
NC_016856.1_294039	294039	+	gene	291925	295036	+	STM14_0297	0	Intra	sense
NC_016856.1_294429	294429	+	gene	291925	295036	+	STM14_0297	0	Intra	sense
NC_016856.1_294508	294508	+	gene	291925	295036	+	STM14_0297	0	Intra	sense
NC_016856.1_294623	294623	+	gene	291925	295036	+	STM14_0297	0	Intra	sense
NC_016856.1_294678	294678	+	gene	291925	295036	+	STM14_0297	0	Intra	sense
NC_016856.1_294737	294737	+	gene	291925	295036	+	STM14_0297	0	Intra	sense
NC_016856.1_294782	294782	+	gene	291925	295036	+	STM14_0297	0	Intra	sense
NC_016856.1_294928	294928	+	gene	291925	295036	+	STM14_0297	0	Intra	sense
NC_016856.1_295033	295033	+	gene	291925	295036	+	STM14_0297	0	Intra	sense
NC_016856.1_295254	295254	+	gene	295221	295336	+	STM14_0298	0	Intra	sense
NC_016856.1_295312	295312	+	gene	295221	295336	+	STM14_0298	0	Intra	sense
NC_016856.1_295499	295499	+	gene	295528	295604	+	STM14_0299	29	Inter	sense
NC_016856.1_295528	295528	+	gene	295528	295604	+	STM14_0299	0	Intra	sense
NC_016856.1_295651	295651	-	gene	295528	295604	+	STM14_0299	-47	Inter	antisense
NC_016856.1_295734	295734	+	gene	295769	296572	+	STM14_0300	35	Inter	sense
NC_016856.1_295999	295999	+	gene	295769	296572	+	STM14_0300	0	Intra	sense
NC_016856.1_296770	296770	-	gene	296593	297507	-	STM14_0301	0	Intra	sense
NC_016856.1_297894	297894	+	gene	297612	298787	+	STM14_0302	0	Intra	sense
NC_016856.1_300525	300525	-	gene	299797	300567	+	STM14_0304	0	Intra	antisense
NC_016856.1_302017	302017	-	gene	300623	301990	-	STM14_0305	-27	Inter	sense
NC_016856.1_302253	302253	+	gene	302062	302817	-	STM14_0306	0	Intra	antisense
NC_016856.1_302264	302264	+	gene	302062	302817	-	STM14_0306	0	Intra	antisense
NC_016856.1_303308	303308	+	gene	302852	303574	+	STM14_0307	0	Intra	sense
NC_016856.1_304057	304057	+	gene	303571	304038	-	STM14_0308	-19	Inter	antisense
NC_016856.1_304967	304967	+	gene	304967	305043	+	STM14_0311	0	Intra	sense
NC_016856.1_309914	309914	-	gene	309813	310637	-	STM14_0317	0	Intra	sense
NC_016856.1_311336	311336	-	gene	310624	311526	-	STM14_0318	0	Intra	sense
NC_016856.1_311518	311518	-	gene	310624	311526	-	STM14_0318	0	Intra	sense
NC_016856.1_318624	318624	+	gene	318368	318853	+	STM14_0325	0	Intra	sense
NC_016856.1_324896	324896	+	gene	324546	328415	+	STM14_0333	0	Intra	sense
NC_016856.1_327401	327401	+	gene	324546	328415	+	STM14_0333	0	Intra	sense
NC_016856.1_329634	329634	+	gene	329640	330161	+	STM14_0336	6	Inter	sense
NC_016856.1_336869	336869	+	gene	333236	337330	+	STM14_0340	0	Intra	sense
NC_016856.1_336884	336884	+	gene	333236	337330	+	STM14_0340	0	Intra	sense
NC_016856.1_336938	336938	-	gene	333236	337330	+	STM14_0340	0	Intra	antisense
NC_016856.1_338074	338074	+	gene	337780	338520	+	STM14_0341	0	Intra	sense
NC_016856.1_338207	338207	+	gene	337780	338520	+	STM14_0341	0	Intra	sense
NC_016856.1_338477	338477	+	gene	337780	338520	+	STM14_0341	0	Intra	sense
NC_016856.1_340479	340479	+	pseudogene	340416	340646	+	STM14_0347	0	Intra	sense
NC_016856.1_343139	343139	+	gene	342894	343406	+	STM14_0352	0	Intra	sense
NC_016856.1_343218	343218	+	gene	342894	343406	+	STM14_0352	0	Intra	sense
NC_016856.1_345938	345938	-	gene	344251	346761	+	STM14_0354	0	Intra	antisense
NC_016856.1_349112	349112	+	gene	349295	350242	+	STM14_0358	183	Inter	sense
NC_016856.1_349211	349211	+	gene	349295	350242	+	STM14_0358	84	Inter	sense
NC_016856.1_350898	350898	-	gene	350578	351297	-	STM14_0360	0	Intra	sense
NC_016856.1_351366	351366	+	gene	350578	351297	-	STM14_0360	-69	Inter	antisense
NC_016856.1_351467	351467	+	gene	351628	352035	-	STM14_0362	161	Inter	antisense
NC_016856.1_352115	352115	-	gene	351628	352035	-	STM14_0362	-80	Inter	sense
NC_016856.1_353199	353199	-	gene	352406	353173	-	STM14_0364	-26	Inter	sense
NC_016856.1_354647	354647	-	gene	353282	355726	-	STM14_0365	0	Intra	sense
NC_016856.1_355700	355700	-	gene	353282	355726	-	STM14_0365	0	Intra	sense
NC_016856.1_355770	355770	-	gene	353282	355726	-	STM14_0365	-44	Inter	sense
NC_016856.1_355935	355935	+	gene	355966	356544	+	STM14_0366	31	Inter	sense
NC_016856.1_356240	356240	+	gene	355966	356544	+	STM14_0366	0	Intra	sense
NC_016856.1_356487	356487	-	gene	355966	356544	+	STM14_0366	0	Intra	antisense
NC_016856.1_356516	356516	+	gene	355966	356544	+	STM14_0366	0	Intra	sense
NC_016856.1_356537	356537	-	gene	355966	356544	+	STM14_0366	0	Intra	antisense
NC_016856.1_356660	356660	-	gene	356757	357524	+	STM14_0367	97	Inter	antisense
NC_016856.1_356714	356714	+	gene	356757	357524	+	STM14_0367	43	Inter	sense
NC_016856.1_357529	357529	+	gene	357495	358235	-	STM14_0368	0	Intra	antisense
NC_016856.1_358314	358314	-	gene	357495	358235	-	STM14_0368	-79	Inter	sense
NC_016856.1_358467	358467	+	gene	358485	359540	+	STM14_0369	18	Inter	sense
NC_016856.1_358773	358773	+	gene	358485	359540	+	STM14_0369	0	Intra	sense
NC_016856.1_359608	359608	+	gene	358485	359540	+	STM14_0369	-68	Inter	sense
NC_016856.1_363193	363193	-	gene	361658	363115	-	STM14_0372	-78	Inter	sense
NC_016856.1_363306	363306	+	gene	363364	363822	+	STM14_0373	58	Inter	sense
NC_016856.1_363886	363886	+	gene	363911	365155	+	STM14_0374	25	Inter	sense
NC_016856.1_364049	364049	-	gene	363911	365155	+	STM14_0374	0	Intra	antisense
NC_016856.1_365194	365194	+	gene	365213	365614	+	STM14_0375	19	Inter	sense
NC_016856.1_366963	366963	+	gene	367000	368103	+	STM14_0378	37	Inter	sense
NC_016856.1_367006	367006	+	gene	367000	368103	+	STM14_0378	0	Intra	sense
NC_016856.1_369481	369481	+	gene	369481	369556	+	STM14_0380	0	Intra	sense
NC_016856.1_369721	369721	+	pseudogene	369819	370598	-	STM14_0381	98	Inter	antisense
NC_016856.1_369880	369880	-	pseudogene	369819	370598	-	STM14_0381	0	Intra	sense
NC_016856.1_371413	371413	+	gene	371424	371747	+	STM14_0383	11	Inter	sense
NC_016856.1_372037	372037	+	gene	372088	373326	+	STM14_0384	51	Inter	sense
NC_016856.1_372497	372497	-	gene	372088	373326	+	STM14_0384	0	Intra	antisense
NC_016856.1_376116	376116	+	gene	375522	376400	+	STM14_0387	0	Intra	sense
NC_016856.1_376591	376591	-	gene	376400	377314	+	STM14_0388	0	Intra	antisense
NC_016856.1_377322	377322	+	gene	376400	377314	+	STM14_0388	-8	Inter	sense
NC_016856.1_377759	377759	+	gene	377348	378313	+	STM14_0389	0	Intra	sense
NC_016856.1_379120	379120	+	gene	379221	379619	+	STM14_0391	101	Inter	sense
NC_016856.1_380271	380271	+	gene	379666	380424	-	STM14_0392	0	Intra	antisense
NC_016856.1_380331	380331	-	gene	379666	380424	-	STM14_0392	0	Intra	sense
NC_016856.1_382345	382345	-	gene	381720	384287	-	STM14_0394	0	Intra	sense
NC_016856.1_382554	382554	-	gene	381720	384287	-	STM14_0394	0	Intra	sense
NC_016856.1_386262	386262	+	gene	386264	387028	+	STM14_0398	2	Inter	sense
NC_016856.1_387342	387342	+	gene	387298	387501	+	STM14_RS25870	0	Intra	sense
NC_016856.1_388811	388811	+	gene	387801	389375	+	STM14_0400	0	Intra	sense
NC_016856.1_389727	389727	+	gene	389475	390218	+	STM14_0401	0	Intra	sense
NC_016856.1_390376	390376	-	gene	390191	390679	+	STM14_0402	0	Intra	antisense
NC_016856.1_392691	392691	+	gene	392683	393042	+	STM14_0407	0	Intra	sense
NC_016856.1_402407	402407	-	gene	402095	402289	+	STM14_0414	-118	Inter	antisense
NC_016856.1_402454	402454	+	gene	402582	403835	+	STM14_0416	128	Inter	sense
NC_016856.1_402469	402469	+	gene	402582	403835	+	STM14_0416	113	Inter	sense
NC_016856.1_406984	406984	+	gene	405992	408964	+	STM14_0418	0	Intra	sense
NC_016856.1_412164	412164	+	gene	412206	413210	+	STM14_0425	42	Inter	sense
NC_016856.1_412192	412192	+	gene	412206	413210	+	STM14_0425	14	Inter	sense
NC_016856.1_416153	416153	-	gene	415505	416137	-	STM14_0427	-16	Inter	sense
NC_016856.1_416166	416166	-	gene	415505	416137	-	STM14_0427	-29	Inter	sense
NC_016856.1_416168	416168	-	gene	415505	416137	-	STM14_0427	-31	Inter	sense
NC_016856.1_416304	416304	+	gene	416369	416644	+	STM14_0428	65	Inter	sense
NC_016856.1_416340	416340	-	gene	416369	416644	+	STM14_0428	29	Inter	antisense
NC_016856.1_417263	417263	-	gene	416780	418405	-	STM14_0429	0	Intra	sense
NC_016856.1_418634	418634	+	gene	418670	419557	+	STM14_0431	36	Inter	sense
NC_016856.1_419647	419647	-	gene	419680	420849	+	STM14_0432	33	Inter	antisense
NC_016856.1_425371	425371	-	gene	424371	425345	-	STM14_0435	-26	Inter	sense
NC_016856.1_426552	426552	+	gene	425858	428794	+	STM14_0438	0	Intra	sense
NC_016856.1_427061	427061	+	gene	425858	428794	+	STM14_0438	0	Intra	sense
NC_016856.1_428288	428288	+	gene	425858	428794	+	STM14_0438	0	Intra	sense
NC_016856.1_428318	428318	+	gene	425858	428794	+	STM14_0438	0	Intra	sense
NC_016856.1_428896	428896	+	gene	428880	429503	+	STM14_0439	0	Intra	sense
NC_016856.1_428931	428931	-	gene	428880	429503	+	STM14_0439	0	Intra	antisense
NC_016856.1_428966	428966	-	gene	428880	429503	+	STM14_0439	0	Intra	antisense
NC_016856.1_430737	430737	-	gene	430751	430954	-	STM14_0441	14	Inter	sense
NC_016856.1_430872	430872	+	gene	430751	430954	-	STM14_0441	0	Intra	antisense
NC_016856.1_431442	431442	-	gene	431052	432272	+	STM14_0443	0	Intra	antisense
NC_016856.1_431443	431443	-	gene	431052	432272	+	STM14_0443	0	Intra	antisense
NC_016856.1_431988	431988	-	gene	431052	432272	+	STM14_0443	0	Intra	antisense
NC_016856.1_432098	432098	+	gene	431052	432272	+	STM14_0443	0	Intra	sense
NC_016856.1_432205	432205	+	gene	431052	432272	+	STM14_0443	0	Intra	sense
NC_016856.1_433776	433776	-	gene	433419	433727	-	STM14_0445	-49	Inter	sense
NC_016856.1_433964	433964	+	gene	433995	434210	+	STM14_0447	31	Inter	sense
NC_016856.1_434066	434066	+	gene	433995	434210	+	STM14_0447	0	Intra	sense
NC_016856.1_435322	435322	-	gene	434236	435330	-	STM14_0448	0	Intra	sense
NC_016856.1_435358	435358	-	gene	434236	435330	-	STM14_0448	-28	Inter	sense
NC_016856.1_435416	435416	+	gene	435408	436121	+	STM14_0449	0	Intra	sense
NC_016856.1_437603	437603	+	gene	436290	437501	+	STM14_0450	-102	Inter	sense
NC_016856.1_437622	437622	+	gene	436290	437501	+	STM14_0450	-121	Inter	sense
NC_016856.1_437648	437648	+	gene	437792	438058	+	STM14_0452	144	Inter	sense
NC_016856.1_437775	437775	+	gene	437792	438058	+	STM14_0452	17	Inter	sense
NC_016856.1_437776	437776	+	gene	437792	438058	+	STM14_0452	16	Inter	sense
NC_016856.1_438180	438180	+	gene	437792	438058	+	STM14_0452	-122	Inter	sense
NC_016856.1_438345	438345	+	gene	438410	438730	+	STM14_0454	65	Inter	sense
NC_016856.1_438399	438399	+	gene	438410	438730	+	STM14_0454	11	Inter	sense
NC_016856.1_440795	440795	+	gene	439949	440758	-	STM14_0456	-37	Inter	antisense
NC_016856.1_441411	441411	+	gene	440898	441353	+	STM14_0458	-58	Inter	sense
NC_016856.1_442421	442421	+	gene	442110	442301	+	STM14_0460	-120	Inter	sense
NC_016856.1_442474	442474	+	gene	442552	443229	+	STM14_0461	78	Inter	sense
NC_016856.1_443273	443273	+	gene	443300	443584	+	STM14_0462	27	Inter	sense
NC_016856.1_443284	443284	+	gene	443300	443584	+	STM14_0462	16	Inter	sense
NC_016856.1_444498	444498	+	gene	443622	444533	-	STM14_0463	0	Intra	antisense
NC_016856.1_444564	444564	-	gene	443622	444533	-	STM14_0463	-31	Inter	sense
NC_016856.1_444569	444569	+	gene	443622	444533	-	STM14_0463	-36	Inter	antisense
NC_016856.1_451297	451297	-	gene	450071	451273	-	STM14_0468	-24	Inter	sense
NC_016856.1_451456	451456	+	gene	451488	452177	+	STM14_0470	32	Inter	sense
NC_016856.1_451494	451494	+	gene	451488	452177	+	STM14_0470	0	Intra	sense
NC_016856.1_453779	453779	+	gene	453951	455270	+	STM14_0473	172	Inter	sense
NC_016856.1_455109	455109	+	gene	453951	455270	+	STM14_0473	0	Intra	sense
NC_016856.1_456344	456344	+	gene	455345	456715	+	STM14_0474	0	Intra	sense
NC_016856.1_459407	459407	-	gene	458766	459368	-	STM14_0476	-39	Inter	sense
NC_016856.1_461297	461297	+	gene	460253	461317	+	STM14_0478	0	Intra	sense
NC_016856.1_461392	461392	+	gene	461304	461450	+	STM14_0479	0	Intra	sense
NC_016856.1_461987	461987	+	gene	461514	462641	+	STM14_0480	0	Intra	sense
NC_016856.1_462153	462153	+	gene	461514	462641	+	STM14_0480	0	Intra	sense
NC_016856.1_462492	462492	+	gene	461514	462641	+	STM14_0480	0	Intra	sense
NC_016856.1_463041	463041	+	gene	463024	464871	+	STM14_0482	0	Intra	sense
NC_016856.1_464832	464832	+	gene	463024	464871	+	STM14_0482	0	Intra	sense
NC_016856.1_465057	465057	+	gene	464882	465853	+	STM14_0483	0	Intra	sense
NC_016856.1_465496	465496	+	gene	464882	465853	+	STM14_0483	0	Intra	sense
NC_016856.1_466441	466441	+	gene	466392	467084	+	STM14_0485	0	Intra	sense
NC_016856.1_467222	467222	+	gene	467254	467601	+	STM14_0486	32	Inter	sense
NC_016856.1_467990	467990	-	gene	467849	468175	-	STM14_0488	0	Intra	sense
NC_016856.1_469958	469958	-	gene	469393	469932	-	STM14_0490	-26	Inter	sense
NC_016856.1_471773	471773	-	gene	471729	472199	+	STM14_0494	0	Intra	antisense
NC_016856.1_471881	471881	+	gene	471729	472199	+	STM14_0494	0	Intra	sense
NC_016856.1_472529	472529	+	gene	472220	472639	+	STM14_0495	0	Intra	sense
NC_016856.1_475292	475292	-	gene	474292	475266	-	STM14_0499	-26	Inter	sense
NC_016856.1_478108	478108	-	gene	477209	478108	-	STM14_0501	0	Intra	sense
NC_016856.1_487687	487687	-	gene	487473	488384	-	STM14_0513	0	Intra	sense
NC_016856.1_488085	488085	-	gene	487473	488384	-	STM14_0513	0	Intra	sense
NC_016856.1_488419	488419	-	gene	487473	488384	-	STM14_0513	-35	Inter	sense
NC_016856.1_488457	488457	+	gene	488492	489001	+	STM14_0514	35	Inter	sense
NC_016856.1_488466	488466	-	gene	488492	489001	+	STM14_0514	26	Inter	antisense
NC_016856.1_488485	488485	+	gene	488492	489001	+	STM14_0514	7	Inter	sense
NC_016856.1_488500	488500	+	gene	488492	489001	+	STM14_0514	0	Intra	sense
NC_016856.1_490433	490433	-	gene	489048	490412	-	STM14_0515	-21	Inter	sense
NC_016856.1_490920	490920	-	gene	490949	492460	+	STM14_0517	29	Inter	antisense
NC_016856.1_493647	493647	+	gene	492637	493965	+	STM14_0518	0	Intra	sense
NC_016856.1_498112	498112	+	gene	497884	498840	-	STM14_0523	0	Intra	antisense
NC_016856.1_498883	498883	-	gene	497884	498840	-	STM14_0523	-43	Inter	sense
NC_016856.1_498979	498979	-	gene	497884	498840	-	STM14_0523	-139	Inter	sense
NC_016856.1_499026	499026	+	gene	497884	498840	-	STM14_0523	-186	Inter	antisense
NC_016856.1_501433	501433	-	gene	500812	501441	-	STM14_0525	0	Intra	sense
NC_016856.1_501646	501646	+	gene	501468	501653	+	STM14_0526	0	Intra	sense
NC_016856.1_501656	501656	+	gene	501468	501653	+	STM14_0526	-3	Inter	sense
NC_016856.1_501657	501657	+	gene	501468	501653	+	STM14_0526	-4	Inter	sense
NC_016856.1_501719	501719	+	gene	501694	502011	+	STM14_0527	0	Intra	sense
NC_016856.1_502058	502058	+	pseudogene	502022	502210	+	STM14_RS24435	0	Intra	sense
NC_016856.1_502217	502217	+	pseudogene	502022	502210	+	STM14_RS24435	-7	Inter	sense
NC_016856.1_503555	503555	+	gene	502358	503656	+	STM14_0529	0	Intra	sense
NC_016856.1_503780	503780	+	gene	503903	504526	+	STM14_0530	123	Inter	sense
NC_016856.1_503802	503802	+	gene	503903	504526	+	STM14_0530	101	Inter	sense
NC_016856.1_503868	503868	+	gene	503903	504526	+	STM14_0530	35	Inter	sense
NC_016856.1_504428	504428	+	gene	503903	504526	+	STM14_0530	0	Intra	sense
NC_016856.1_504687	504687	+	gene	504778	506049	+	STM14_0532	91	Inter	sense
NC_016856.1_506163	506163	+	gene	506235	508589	+	STM14_0533	72	Inter	sense
NC_016856.1_506203	506203	+	gene	506235	508589	+	STM14_0533	32	Inter	sense
NC_016856.1_508543	508543	-	gene	506235	508589	+	STM14_0533	0	Intra	antisense
NC_016856.1_508680	508680	+	gene	506235	508589	+	STM14_0533	-91	Inter	sense
NC_016856.1_508742	508742	+	gene	508798	509070	+	STM14_0534	56	Inter	sense
NC_016856.1_508784	508784	+	gene	508798	509070	+	STM14_0534	14	Inter	sense
NC_016856.1_510137	510137	-	gene	509361	511232	+	STM14_0535	0	Intra	antisense
NC_016856.1_513082	513082	-	gene	512364	513059	-	STM14_0539	-23	Inter	sense
NC_016856.1_514860	514860	-	gene	513124	514824	-	STM14_0540	-36	Inter	sense
NC_016856.1_514894	514894	+	gene	514925	515743	+	STM14_0541	31	Inter	sense
NC_016856.1_516125	516125	-	gene	515792	516847	-	STM14_0542	0	Intra	sense
NC_016856.1_516867	516867	-	gene	515792	516847	-	STM14_0542	-20	Inter	sense
NC_016856.1_517055	517055	+	gene	516960	517418	+	STM14_RS02915	0	Intra	sense
NC_016856.1_521166	521166	+	gene	521039	521221	+	STM14_RS24440	0	Intra	sense
NC_016856.1_521957	521957	+	gene	521588	522874	+	STM14_0547	0	Intra	sense
NC_016856.1_523105	523105	+	gene	522974	523834	-	STM14_0548	0	Intra	antisense
NC_016856.1_523871	523871	-	gene	522974	523834	-	STM14_0548	-37	Inter	sense
NC_016856.1_523977	523977	+	gene	524049	524618	+	STM14_0549	72	Inter	sense
NC_016856.1_524570	524570	-	gene	524049	524618	+	STM14_0549	0	Intra	antisense
NC_016856.1_524981	524981	-	gene	524651	525040	-	STM14_RS02950	0	Intra	sense
NC_016856.1_525091	525091	+	gene	525125	525221	+	STM14_RS24150	34	Inter	sense
NC_016856.1_525117	525117	+	gene	525125	525221	+	STM14_RS24150	8	Inter	sense
NC_016856.1_525145	525145	+	gene	525125	525221	+	STM14_RS24150	0	Intra	sense
NC_016856.1_525188	525188	+	gene	525125	525221	+	STM14_RS24150	0	Intra	sense
NC_016856.1_525191	525191	+	gene	525125	525221	+	STM14_RS24150	0	Intra	sense
NC_016856.1_525207	525207	+	gene	525125	525221	+	STM14_RS24150	0	Intra	sense
NC_016856.1_525432	525432	-	gene	525271	526821	-	STM14_0552	0	Intra	sense
NC_016856.1_525951	525951	-	gene	525271	526821	-	STM14_0552	0	Intra	sense
NC_016856.1_526835	526835	-	gene	525271	526821	-	STM14_0552	-14	Inter	sense
NC_016856.1_526846	526846	-	gene	525271	526821	-	STM14_0552	-25	Inter	sense
NC_016856.1_526876	526876	-	gene	525271	526821	-	STM14_0552	-55	Inter	sense
NC_016856.1_526887	526887	-	gene	525271	526821	-	STM14_0552	-66	Inter	sense
NC_016856.1_527019	527019	+	gene	527046	527306	+	STM14_0553	27	Inter	sense
NC_016856.1_527334	527334	+	gene	527312	527452	+	STM14_0554	0	Intra	sense
NC_016856.1_528017	528017	-	gene	527508	527978	-	STM14_0555	-39	Inter	sense
NC_016856.1_528108	528108	+	gene	528095	528646	-	STM14_0556	0	Intra	antisense
NC_016856.1_528805	528805	-	gene	528825	529043	-	STM14_0557	20	Inter	sense
NC_016856.1_529142	529142	-	gene	529071	529445	-	STM14_0558	0	Intra	sense
NC_016856.1_529160	529160	-	gene	529071	529445	-	STM14_0558	0	Intra	sense
NC_016856.1_529238	529238	-	gene	529071	529445	-	STM14_0558	0	Intra	sense
NC_016856.1_529247	529247	-	gene	529071	529445	-	STM14_0558	0	Intra	sense
NC_016856.1_529534	529534	-	gene	529071	529445	-	STM14_0558	-89	Inter	sense
NC_016856.1_529567	529567	-	gene	529071	529445	-	STM14_0558	-122	Inter	sense
NC_016856.1_529711	529711	-	gene	529941	533090	-	STM14_0559	230	Inter	sense
NC_016856.1_530219	530219	-	gene	529941	533090	-	STM14_0559	0	Intra	sense
NC_016856.1_533195	533195	+	gene	533113	534306	-	STM14_0560	0	Intra	antisense
NC_016856.1_534385	534385	-	gene	534448	535101	+	STM14_0561	63	Inter	antisense
NC_016856.1_534403	534403	+	gene	534448	535101	+	STM14_0561	45	Inter	sense
NC_016856.1_534666	534666	-	gene	534448	535101	+	STM14_0561	0	Intra	antisense
NC_016856.1_534713	534713	-	gene	534448	535101	+	STM14_0561	0	Intra	antisense
NC_016856.1_534738	534738	-	gene	534448	535101	+	STM14_0561	0	Intra	antisense
NC_016856.1_534773	534773	-	gene	534448	535101	+	STM14_0561	0	Intra	antisense
NC_016856.1_534792	534792	-	gene	534448	535101	+	STM14_0561	0	Intra	antisense
NC_016856.1_534795	534795	+	gene	534448	535101	+	STM14_0561	0	Intra	sense
NC_016856.1_534904	534904	+	gene	534448	535101	+	STM14_0561	0	Intra	sense
NC_016856.1_534913	534913	+	gene	534448	535101	+	STM14_0561	0	Intra	sense
NC_016856.1_535178	535178	+	gene	535220	538582	+	STM14_0563	42	Inter	sense
NC_016856.1_539140	539140	-	gene	538624	539559	-	STM14_0564	0	Intra	sense
NC_016856.1_539651	539651	-	gene	539629	539796	-	STM14_0565	0	Intra	sense
NC_016856.1_540314	540314	-	gene	539810	540325	-	STM14_0566	0	Intra	sense
NC_016856.1_540412	540412	-	gene	540406	540783	+	STM14_0567	0	Intra	antisense
NC_016856.1_543471	543471	+	gene	541601	543529	+	STM14_0569	0	Intra	sense
NC_016856.1_544574	544574	-	gene	544596	546494	+	STM14_0572	22	Inter	antisense
NC_016856.1_545993	545993	+	gene	544596	546494	+	STM14_0572	0	Intra	sense
NC_016856.1_546693	546693	+	gene	546597	546818	-	STM14_0573	0	Intra	antisense
NC_016856.1_546915	546915	+	gene	546735	547379	+	STM14_0574	0	Intra	sense
NC_016856.1_547584	547584	+	gene	547392	547598	+	STM14_0575	0	Intra	sense
NC_016856.1_550097	550097	+	gene	549691	550995	+	STM14_0578	0	Intra	sense
NC_016856.1_550898	550898	+	gene	549691	550995	+	STM14_0578	0	Intra	sense
NC_016856.1_554285	554285	+	gene	554328	555980	+	STM14_0582	43	Inter	sense
NC_016856.1_554305	554305	+	gene	554328	555980	+	STM14_0582	23	Inter	sense
NC_016856.1_554343	554343	+	gene	554328	555980	+	STM14_0582	0	Intra	sense
NC_016856.1_556605	556605	-	gene	556097	556576	-	STM14_0583	-29	Inter	sense
NC_016856.1_556656	556656	+	gene	556097	556576	-	STM14_0583	-80	Inter	antisense
NC_016856.1_556700	556700	+	gene	556778	557572	-	STM14_0584	78	Inter	antisense
NC_016856.1_556717	556717	-	gene	556778	557572	-	STM14_0584	61	Inter	sense
NC_016856.1_561166	561166	+	gene	558639	561140	-	STM14_0586	-26	Inter	antisense
NC_016856.1_561202	561202	-	gene	561250	561666	+	STM14_0587	48	Inter	antisense
NC_016856.1_563082	563082	-	gene	562116	563033	-	STM14_0589	-49	Inter	sense
NC_016856.1_563126	563126	-	gene	563180	563857	+	STM14_0590	54	Inter	antisense
NC_016856.1_563150	563150	+	gene	563180	563857	+	STM14_0590	30	Inter	sense
NC_016856.1_563647	563647	+	gene	563180	563857	+	STM14_0590	0	Intra	sense
NC_016856.1_567197	567197	-	gene	567133	567819	+	STM14_0595	0	Intra	antisense
NC_016856.1_570800	570800	+	gene	570416	571549	+	STM14_0598	0	Intra	sense
NC_016856.1_571015	571015	-	gene	570416	571549	+	STM14_0598	0	Intra	antisense
NC_016856.1_571723	571723	+	gene	571806	572636	+	STM14_0600	83	Inter	sense
NC_016856.1_573683	573683	-	gene	572673	573689	+	STM14_0601	0	Intra	antisense
NC_016856.1_573683	573683	-	gene	573682	574341	+	STM14_0602	0	Intra	antisense
NC_016856.1_575504	575504	-	gene	574380	575474	-	STM14_0603	-30	Inter	sense
NC_016856.1_576526	576526	-	gene	575544	576470	-	STM14_0604	-56	Inter	sense
NC_016856.1_576637	576637	+	gene	576697	577179	+	STM14_0605	60	Inter	sense
NC_016856.1_577211	577211	+	gene	576697	577179	+	STM14_0605	-32	Inter	sense
NC_016856.1_581906	581906	-	gene	581776	583023	+	STM14_0610	0	Intra	antisense
NC_016856.1_589439	589439	-	gene	589417	590652	-	STM14_0617	0	Intra	sense
NC_016856.1_592156	592156	+	gene	592054	593718	+	STM14_0619	0	Intra	sense
NC_016856.1_596679	596679	+	gene	595812	596705	+	STM14_0622	0	Intra	sense
NC_016856.1_596889	596889	-	gene	596746	597813	-	STM14_0623	0	Intra	sense
NC_016856.1_599709	599709	-	gene	599162	599656	-	STM14_0626	-53	Inter	sense
NC_016856.1_599795	599795	+	gene	599829	601214	+	STM14_0627	34	Inter	sense
NC_016856.1_603407	603407	+	gene	603396	604262	-	STM14_0632	0	Intra	antisense
NC_016856.1_604303	604303	-	gene	603396	604262	-	STM14_0632	-41	Inter	sense
NC_016856.1_607605	607605	-	gene	606742	609354	+	STM14_0638	0	Intra	antisense
NC_016856.1_609851	609851	+	gene	609369	610376	+	STM14_0639	0	Intra	sense
NC_016856.1_610797	610797	+	gene	610386	610904	+	STM14_0640	0	Intra	sense
NC_016856.1_612128	612128	+	gene	612186	612908	-	STM14_0642	58	Inter	antisense
NC_016856.1_613003	613003	+	gene	612927	613238	-	STM14_0643	0	Intra	antisense
NC_016856.1_613073	613073	+	gene	612927	613238	-	STM14_0643	0	Intra	antisense
NC_016856.1_614524	614524	+	pseudogene	614444	615111	-	STM14_0648	0	Intra	antisense
NC_016856.1_616368	616368	+	gene	615498	617150	-	STM14_0650	0	Intra	antisense
NC_016856.1_618523	618523	+	gene	618054	618416	-	STM14_0652	-107	Inter	antisense
NC_016856.1_619533	619533	-	gene	619284	619613	-	STM14_0655	0	Intra	sense
NC_016856.1_620989	620989	+	gene	621022	622347	+	STM14_0658	33	Inter	sense
NC_016856.1_621934	621934	+	gene	621022	622347	+	STM14_0658	0	Intra	sense
NC_016856.1_622150	622150	+	gene	621022	622347	+	STM14_0658	0	Intra	sense
NC_016856.1_622475	622475	+	gene	622266	622520	-	STM14_0659	0	Intra	antisense
NC_016856.1_624649	624649	-	gene	623392	624567	-	STM14_0662	-82	Inter	sense
NC_016856.1_624691	624691	-	gene	623392	624567	-	STM14_0662	-124	Inter	sense
NC_016856.1_625625	625625	-	gene	624893	626287	+	STM14_0663	0	Intra	antisense
NC_016856.1_626056	626056	+	gene	624893	626287	+	STM14_0663	0	Intra	sense
NC_016856.1_626185	626185	+	gene	624893	626287	+	STM14_0663	0	Intra	sense
NC_016856.1_626197	626197	+	gene	624893	626287	+	STM14_0663	0	Intra	sense
NC_016856.1_626204	626204	+	gene	624893	626287	+	STM14_0663	0	Intra	sense
NC_016856.1_630808	630808	-	gene	630024	632753	+	STM14_0667	0	Intra	antisense
NC_016856.1_638407	638407	-	gene	637722	638375	-	STM14_0674	-32	Inter	sense
NC_016856.1_639448	639448	-	gene	638840	639421	-	STM14_0676	-27	Inter	sense
NC_016856.1_641514	641514	-	gene	641502	642206	-	STM14_0681	0	Intra	sense
NC_016856.1_641600	641600	+	gene	641502	642206	-	STM14_0681	0	Intra	antisense
NC_016856.1_642289	642289	-	gene	642252	644507	-	STM14_0682	0	Intra	sense
NC_016856.1_642633	642633	+	gene	642252	644507	-	STM14_0682	0	Intra	antisense
NC_016856.1_642935	642935	-	gene	642252	644507	-	STM14_0682	0	Intra	sense
NC_016856.1_649685	649685	+	gene	646156	650040	+	STM14_0686	0	Intra	sense
NC_016856.1_649879	649879	+	gene	646156	650040	+	STM14_0686	0	Intra	sense
NC_016856.1_650246	650246	+	gene	650290	651426	+	STM14_0687	44	Inter	sense
NC_016856.1_650428	650428	+	gene	650290	651426	+	STM14_0687	0	Intra	sense
NC_016856.1_650869	650869	+	gene	650290	651426	+	STM14_0687	0	Intra	sense
NC_016856.1_651397	651397	+	gene	650290	651426	+	STM14_0687	0	Intra	sense
NC_016856.1_654336	654336	+	gene	654377	655621	+	STM14_0691	41	Inter	sense
NC_016856.1_656753	656753	-	gene	655684	656640	-	STM14_0692	-113	Inter	sense
NC_016856.1_656787	656787	-	gene	655684	656640	-	STM14_0692	-147	Inter	sense
NC_016856.1_661322	661322	-	gene	660615	661370	+	STM14_0696	0	Intra	antisense
NC_016856.1_661920	661920	+	gene	661968	664073	+	STM14_0699	48	Inter	sense
NC_016856.1_661929	661929	+	gene	661968	664073	+	STM14_0699	39	Inter	sense
NC_016856.1_661931	661931	+	gene	661968	664073	+	STM14_0699	37	Inter	sense
NC_016856.1_663686	663686	+	gene	661968	664073	+	STM14_0699	0	Intra	sense
NC_016856.1_664605	664605	-	gene	664370	665458	-	STM14_0701	0	Intra	sense
NC_016856.1_665521	665521	-	gene	664370	665458	-	STM14_0701	-63	Inter	sense
NC_016856.1_665557	665557	+	gene	665585	666745	+	STM14_0702	28	Inter	sense
NC_016856.1_666748	666748	+	gene	666746	667363	-	STM14_0703	0	Intra	antisense
NC_016856.1_666749	666749	+	gene	666746	667363	-	STM14_0703	0	Intra	antisense
NC_016856.1_667268	667268	-	gene	666746	667363	-	STM14_0703	0	Intra	sense
NC_016856.1_667953	667953	-	gene	667336	668571	-	STM14_0704	0	Intra	sense
NC_016856.1_670047	670047	+	gene	669956	670702	-	STM14_0706	0	Intra	antisense
NC_016856.1_671119	671119	+	gene	671143	671706	+	STM14_0707	24	Inter	sense
NC_016856.1_671129	671129	-	gene	671143	671706	+	STM14_0707	14	Inter	antisense
NC_016856.1_672895	672895	-	gene	671948	673513	+	STM14_0708	0	Intra	antisense
NC_016856.1_673585	673585	+	gene	671948	673513	+	STM14_0708	-72	Inter	sense
NC_016856.1_674407	674407	+	gene	674398	676677	+	STM14_0710	0	Intra	sense
NC_016856.1_676201	676201	-	gene	674398	676677	+	STM14_0710	0	Intra	antisense
NC_016856.1_677468	677468	+	gene	677033	677800	+	STM14_0712	0	Intra	sense
NC_016856.1_678323	678323	-	gene	678228	678434	+	STM14_0714	0	Intra	antisense
NC_016856.1_678333	678333	-	gene	678228	678434	+	STM14_0714	0	Intra	antisense
NC_016856.1_680223	680223	-	gene	679840	680250	-	STM14_0717	0	Intra	sense
NC_016856.1_680223	680223	-	gene	680200	680382	+	STM14_RS24495	0	Intra	antisense
NC_016856.1_680338	680338	-	gene	680200	680382	+	STM14_RS24495	0	Intra	antisense
NC_016856.1_680418	680418	-	gene	680200	680382	+	STM14_RS24495	-36	Inter	antisense
NC_016856.1_681323	681323	-	gene	680485	681291	-	STM14_0718	-32	Inter	sense
NC_016856.1_685877	685877	+	gene	685864	686772	-	STM14_0723	0	Intra	antisense
NC_016856.1_690953	690953	-	gene	690887	692272	-	STM14_0729	0	Intra	sense
NC_016856.1_693787	693787	-	gene	693678	694061	-	STM14_0733	0	Intra	sense
NC_016856.1_694089	694089	-	gene	693678	694061	-	STM14_0733	-28	Inter	sense
NC_016856.1_695022	695022	+	gene	695069	695272	+	STM14_0736	47	Inter	sense
NC_016856.1_697283	697283	+	gene	696529	697482	-	STM14_0739	0	Intra	antisense
NC_016856.1_697505	697505	-	gene	696529	697482	-	STM14_0739	-23	Inter	sense
NC_016856.1_697688	697688	-	gene	697784	698425	-	STM14_0741	96	Inter	sense
NC_016856.1_698848	698848	-	gene	698897	700108	-	STM14_0744	49	Inter	sense
NC_016856.1_701535	701535	-	gene	701404	702516	-	STM14_0747	0	Intra	sense
NC_016856.1_705278	705278	+	gene	704922	705239	-	STM14_0750	-39	Inter	antisense
NC_016856.1_709685	709685	-	gene	709621	712203	-	STM14_0756	0	Intra	sense
NC_016856.1_712265	712265	-	gene	709621	712203	-	STM14_0756	-62	Inter	sense
NC_016856.1_716401	716401	+	gene	715041	716969	+	STM14_0760	0	Intra	sense
NC_016856.1_717037	717037	+	gene	717062	717535	+	STM14_0761	25	Inter	sense
NC_016856.1_720025	720025	-	gene	719398	720831	+	STM14_0764	0	Intra	antisense
NC_016856.1_722804	722804	+	gene	721536	723008	+	STM14_0766	0	Intra	sense
NC_016856.1_725976	725976	+	gene	724785	726023	-	STM14_0768	0	Intra	antisense
NC_016856.1_729413	729413	-	gene	729406	730332	-	STM14_0773	0	Intra	sense
NC_016856.1_729425	729425	-	gene	729406	730332	-	STM14_0773	0	Intra	sense
NC_016856.1_730401	730401	-	gene	730384	730596	+	STM14_0774	0	Intra	antisense
NC_016856.1_730577	730577	-	gene	730384	730596	+	STM14_0774	0	Intra	antisense
NC_016856.1_731080	731080	+	gene	730669	732207	-	STM14_0775	0	Intra	antisense
NC_016856.1_731253	731253	+	gene	730669	732207	-	STM14_0775	0	Intra	antisense
NC_016856.1_731343	731343	+	gene	730669	732207	-	STM14_0775	0	Intra	antisense
NC_016856.1_732275	732275	-	gene	732227	733105	-	STM14_0776	0	Intra	sense
NC_016856.1_733277	733277	-	gene	733263	733736	-	STM14_0778	0	Intra	sense
NC_016856.1_734651	734651	+	gene	733733	734818	-	STM14_0779	0	Intra	antisense
NC_016856.1_734830	734830	-	gene	733733	734818	-	STM14_0779	-12	Inter	sense
NC_016856.1_736529	736529	+	gene	736552	737727	+	STM14_0782	23	Inter	sense
NC_016856.1_738028	738028	+	gene	737794	738369	-	STM14_0783	0	Intra	antisense
NC_016856.1_738579	738579	-	gene	738505	738579	-	STM14_0784	0	Intra	sense
NC_016856.1_738697	738697	-	gene	738623	738697	-	STM14_0785	0	Intra	sense
NC_016856.1_739128	739128	-	gene	739044	739128	-	STM14_0789	0	Intra	sense
NC_016856.1_739245	739245	-	gene	739137	739213	-	STM14_0790	-32	Inter	sense
NC_016856.1_739349	739349	-	gene	739436	741100	-	STM14_0792	87	Inter	sense
NC_016856.1_741145	741145	-	pseudogene	741045	741291	-	STM14_RS24505	0	Intra	sense
NC_016856.1_742166	742166	-	gene	742189	743409	-	STM14_0794	23	Inter	sense
NC_016856.1_743682	743682	-	gene	743414	744568	-	STM14_0795	0	Intra	sense
NC_016856.1_745466	745466	-	gene	744628	745428	-	STM14_0796	-38	Inter	sense
NC_016856.1_745516	745516	-	gene	744628	745428	-	STM14_0796	-88	Inter	sense
NC_016856.1_745650	745650	+	gene	745755	747707	+	STM14_0798	105	Inter	sense
NC_016856.1_747888	747888	+	gene	747918	749585	+	STM14_0799	30	Inter	sense
NC_016856.1_749721	749721	-	gene	747918	749585	+	STM14_0799	-136	Inter	antisense
NC_016856.1_750605	750605	+	gene	750031	751437	+	STM14_0802	0	Intra	sense
NC_016856.1_752415	752415	+	gene	751868	753172	-	STM14_0804	0	Intra	antisense
NC_016856.1_752926	752926	-	gene	751868	753172	-	STM14_0804	0	Intra	sense
NC_016856.1_755791	755791	-	gene	754349	755752	-	STM14_0806	-39	Inter	sense
NC_016856.1_755796	755796	+	gene	754349	755752	-	STM14_0806	-44	Inter	antisense
NC_016856.1_757412	757412	-	gene	756891	757343	-	STM14_0808	-69	Inter	sense
NC_016856.1_757518	757518	-	gene	757625	758155	-	STM14_0810	107	Inter	sense
NC_016856.1_757972	757972	-	gene	757625	758155	-	STM14_0810	0	Intra	sense
NC_016856.1_758211	758211	-	gene	757625	758155	-	STM14_0810	-56	Inter	sense
NC_016856.1_758651	758651	-	gene	758318	758599	-	STM14_0811	-52	Inter	sense
NC_016856.1_758962	758962	-	gene	758733	759503	-	STM14_0813	0	Intra	sense
NC_016856.1_759534	759534	-	gene	758733	759503	-	STM14_0813	-31	Inter	sense
NC_016856.1_759552	759552	+	gene	758733	759503	-	STM14_0813	-49	Inter	antisense
NC_016856.1_759652	759652	+	gene	759688	760230	+	STM14_0814	36	Inter	sense
NC_016856.1_759696	759696	+	gene	759688	760230	+	STM14_0814	0	Intra	sense
NC_016856.1_759984	759984	+	gene	759688	760230	+	STM14_0814	0	Intra	sense
NC_016856.1_760241	760241	+	gene	759688	760230	+	STM14_0814	-11	Inter	sense
NC_016856.1_760342	760342	+	gene	760255	761895	+	STM14_0815	0	Intra	sense
NC_016856.1_762436	762436	-	gene	762010	762495	-	STM14_0816	0	Intra	sense
NC_016856.1_767586	767586	-	gene	767510	770194	-	STM14_0822	0	Intra	sense
NC_016856.1_767987	767987	-	gene	767510	770194	-	STM14_0822	0	Intra	sense
NC_016856.1_770285	770285	-	gene	770191	770775	-	STM14_0823	0	Intra	sense
NC_016856.1_774873	774873	+	gene	774958	775164	+	STM14_0827	85	Inter	sense
NC_016856.1_774952	774952	+	gene	774958	775164	+	STM14_0827	6	Inter	sense
NC_016856.1_775239	775239	+	gene	775275	776696	+	STM14_0828	36	Inter	sense
NC_016856.1_776348	776348	+	gene	775275	776696	+	STM14_0828	0	Intra	sense
NC_016856.1_778497	778497	+	gene	778545	779288	+	STM14_0830	48	Inter	sense
NC_016856.1_781623	781623	-	gene	780876	781610	+	STM14_0833	-13	Inter	antisense
NC_016856.1_781641	781641	+	gene	780876	781610	+	STM14_0833	-31	Inter	sense
NC_016856.1_782102	782102	+	gene	782125	782691	+	STM14_0835	23	Inter	sense
NC_016856.1_782120	782120	+	gene	782125	782691	+	STM14_0835	5	Inter	sense
NC_016856.1_782731	782731	-	gene	782125	782691	+	STM14_0835	-40	Inter	antisense
NC_016856.1_794307	794307	+	gene	794236	794373	+	STM14_0846	0	Intra	sense
NC_016856.1_797654	797654	-	gene	796451	797734	-	STM14_0849	0	Intra	sense
NC_016856.1_797983	797983	-	gene	797694	798080	+	STM14_0850	0	Intra	antisense
NC_016856.1_797991	797991	-	gene	797694	798080	+	STM14_0850	0	Intra	antisense
NC_016856.1_798031	798031	-	gene	797694	798080	+	STM14_0850	0	Intra	antisense
NC_016856.1_798082	798082	-	gene	797694	798080	+	STM14_0850	-2	Inter	antisense
NC_016856.1_798085	798085	-	gene	797694	798080	+	STM14_0850	-5	Inter	antisense
NC_016856.1_798105	798105	-	gene	797694	798080	+	STM14_0850	-25	Inter	antisense
NC_016856.1_798187	798187	+	pseudogene	798215	798403	-	STM14_RS24515	28	Inter	antisense
NC_016856.1_798228	798228	+	pseudogene	798215	798403	-	STM14_RS24515	0	Intra	antisense
NC_016856.1_798265	798265	+	pseudogene	798215	798403	-	STM14_RS24515	0	Intra	antisense
NC_016856.1_801856	801856	+	gene	801002	801718	+	STM14_0854	-138	Inter	sense
NC_016856.1_802210	802210	+	gene	802242	805043	+	STM14_0855	32	Inter	sense
NC_016856.1_805766	805766	+	gene	805058	806266	+	STM14_0856	0	Intra	sense
NC_016856.1_809206	809206	+	gene	807574	808443	+	STM14_0858	-763	Inter	sense
NC_016856.1_809737	809737	+	gene	810026	811594	+	STM14_0861	289	Inter	sense
NC_016856.1_809771	809771	+	gene	810026	811594	+	STM14_0861	255	Inter	sense
NC_016856.1_809853	809853	+	gene	810026	811594	+	STM14_0861	173	Inter	sense
NC_016856.1_812756	812756	+	gene	811610	812749	+	STM14_0862	-7	Inter	sense
NC_016856.1_813404	813404	+	gene	813014	813295	+	STM14_0865	-109	Inter	sense
NC_016856.1_816183	816183	+	gene	815114	816337	+	STM14_0869	0	Intra	sense
NC_016856.1_816329	816329	+	gene	815114	816337	+	STM14_0869	0	Intra	sense
NC_016856.1_816350	816350	+	gene	815114	816337	+	STM14_0869	-13	Inter	sense
NC_016856.1_816422	816422	+	gene	816461	817753	+	STM14_0870	39	Inter	sense
NC_016856.1_817513	817513	+	gene	816461	817753	+	STM14_0870	0	Intra	sense
NC_016856.1_819560	819560	+	gene	819561	819636	+	STM14_0876	1	Inter	sense
NC_016856.1_821615	821615	+	gene	820575	821618	+	STM14_0880	0	Intra	sense
NC_016856.1_821679	821679	+	gene	821643	822362	+	STM14_0881	0	Intra	sense
NC_016856.1_823327	823327	+	gene	822359	823297	-	STM14_0882	-30	Inter	antisense
NC_016856.1_823943	823943	-	gene	823408	823794	-	STM14_0883	-149	Inter	sense
NC_016856.1_824054	824054	+	gene	824114	825166	+	STM14_0884	60	Inter	sense
NC_016856.1_824073	824073	+	gene	824114	825166	+	STM14_0884	41	Inter	sense
NC_016856.1_826540	826540	-	gene	825820	826665	-	STM14_0886	0	Intra	sense
NC_016856.1_826709	826709	-	gene	825820	826665	-	STM14_0886	-44	Inter	sense
NC_016856.1_826762	826762	+	gene	826795	827685	+	STM14_0887	33	Inter	sense
NC_016856.1_828653	828653	-	gene	827686	828669	-	STM14_0888	0	Intra	sense
NC_016856.1_837255	837255	-	gene	836703	837455	-	STM14_0896	0	Intra	sense
NC_016856.1_837276	837276	-	gene	836703	837455	-	STM14_0896	0	Intra	sense
NC_016856.1_837489	837489	-	gene	837473	837664	-	STM14_0897	0	Intra	sense
NC_016856.1_837492	837492	-	gene	837473	837664	-	STM14_0897	0	Intra	sense
NC_016856.1_837530	837530	-	gene	837473	837664	-	STM14_0897	0	Intra	sense
NC_016856.1_841482	841482	+	gene	840921	841937	-	STM14_0901	0	Intra	antisense
NC_016856.1_841963	841963	-	gene	840921	841937	-	STM14_0901	-26	Inter	sense
NC_016856.1_843898	843898	+	gene	843239	844714	-	STM14_0904	0	Intra	antisense
NC_016856.1_844352	844352	-	gene	843239	844714	-	STM14_0904	0	Intra	sense
NC_016856.1_844739	844739	-	gene	843239	844714	-	STM14_0904	-25	Inter	sense
NC_016856.1_845677	845677	+	gene	845699	845848	+	STM14_RS04525	22	Inter	sense
NC_016856.1_845713	845713	+	gene	845699	845848	+	STM14_RS04525	0	Intra	sense
NC_016856.1_845921	845921	+	gene	845699	845848	+	STM14_RS04525	-73	Inter	sense
NC_016856.1_849209	849209	+	gene	848539	849357	-	STM14_0910	0	Intra	antisense
NC_016856.1_849391	849391	-	gene	848539	849357	-	STM14_0910	-34	Inter	sense
NC_016856.1_852150	852150	+	gene	852181	853404	+	STM14_0913	31	Inter	sense
NC_016856.1_855224	855224	+	gene	855309	856994	+	STM14_0916	85	Inter	sense
NC_016856.1_858993	858993	-	gene	858601	859077	-	STM14_0918	0	Intra	sense
NC_016856.1_866869	866869	+	gene	864774	866795	+	STM14_0926	-74	Inter	sense
NC_016856.1_867068	867068	-	gene	867104	867277	+	STM14_927	36	Inter	antisense
NC_016856.1_868000	868000	-	gene	867285	869582	+	STM14_928	0	Intra	antisense
NC_016856.1_868543	868543	-	gene	867285	869582	+	STM14_928	0	Intra	antisense
NC_016856.1_869523	869523	+	gene	867285	869582	+	STM14_928	0	Intra	sense
NC_016856.1_870606	870606	-	gene	869674	870582	-	STM14_929	-24	Inter	sense
NC_016856.1_870762	870762	+	riboswitch	870847	870991	+	ID=id26;Dbxref=RFAM:RF01055;Note=molybdenum	cofactor	Inter	sense
NC_016856.1_870847	870847	+	riboswitch	870847	870991	+	ID=id26;Dbxref=RFAM:RF01055;Note=molybdenum	cofactor	Inter	sense
NC_016856.1_873706	873706	+	gene	873230	873682	+	STM14_934	-24	Inter	sense
NC_016856.1_873706	873706	+	gene	873730	874434	+	STM14_935	24	Inter	sense
NC_016856.1_873738	873738	+	gene	873730	874434	+	STM14_935	0	Intra	sense
NC_016856.1_877286	877286	-	gene	877202	878164	-	STM14_941	0	Intra	sense
NC_016856.1_880189	880189	-	gene	879402	880160	-	STM14_943	-29	Inter	sense
NC_016856.1_880265	880265	+	gene	880293	880703	+	STM14_944	28	Inter	sense
NC_016856.1_880766	880766	-	gene	880665	881771	-	STM14_945	0	Intra	sense
NC_016856.1_883417	883417	-	gene	883010	884746	-	STM14_948	0	Intra	sense
NC_016856.1_886436	886436	-	gene	885734	886408	-	STM14_950	-28	Inter	sense
NC_016856.1_891473	891473	-	gene	891514	891774	-	STM14_955	41	Inter	sense
NC_016856.1_891823	891823	-	gene	891514	891774	-	STM14_955	-49	Inter	sense
NC_016856.1_892331	892331	-	gene	892059	892325	-	STM14_957	-6	Inter	sense
NC_016856.1_892351	892351	-	gene	892059	892325	-	STM14_957	-26	Inter	sense
NC_016856.1_897332	897332	-	gene	897316	898062	-	STM14_964	0	Intra	sense
NC_016856.1_897888	897888	-	gene	897316	898062	-	STM14_964	0	Intra	sense
NC_016856.1_898104	898104	-	gene	897316	898062	-	STM14_964	-42	Inter	sense
NC_016856.1_898255	898255	-	gene	897316	898062	-	STM14_964	-193	Inter	sense
NC_016856.1_898326	898326	+	gene	898539	899042	-	STM14_966	213	Inter	antisense
NC_016856.1_898330	898330	+	gene	898539	899042	-	STM14_966	209	Inter	antisense
NC_016856.1_899083	899083	-	gene	898539	899042	-	STM14_966	-41	Inter	sense
NC_016856.1_900348	900348	+	gene	899345	900232	-	STM14_968	-116	Inter	antisense
NC_016856.1_900358	900358	+	gene	899345	900232	-	STM14_968	-126	Inter	antisense
NC_016856.1_900426	900426	+	gene	900586	901101	+	STM14_971	160	Inter	sense
NC_016856.1_900553	900553	+	gene	900586	901101	+	STM14_971	33	Inter	sense
NC_016856.1_903188	903188	-	gene	903009	903137	-	STM14_974	-51	Inter	sense
NC_016856.1_905923	905923	-	gene	904949	905869	-	STM14_977	-54	Inter	sense
NC_016856.1_906461	906461	+	gene	906088	907680	+	STM14_978	0	Intra	sense
NC_016856.1_907368	907368	-	gene	906088	907680	+	STM14_978	0	Intra	antisense
NC_016856.1_909611	909611	+	gene	909061	909780	-	STM14_980	0	Intra	antisense
NC_016856.1_909843	909843	+	gene	909061	909780	-	STM14_980	-63	Inter	antisense
NC_016856.1_911664	911664	+	gene	911512	912321	+	STM14_983	0	Intra	sense
NC_016856.1_913952	913952	+	gene	912399	914831	-	STM14_984	0	Intra	antisense
NC_016856.1_915856	915856	+	gene	914837	915736	-	STM14_985	-120	Inter	antisense
NC_016856.1_916838	916838	-	gene	916763	918004	-	STM14_988	0	Intra	sense
NC_016856.1_918027	918027	-	gene	916763	918004	-	STM14_988	-23	Inter	sense
NC_016856.1_918289	918289	+	gene	918201	919142	+	STM14_990	0	Intra	sense
NC_016856.1_926092	926092	+	gene	926137	926520	+	STM14_998	45	Inter	sense
NC_016856.1_926105	926105	+	gene	926137	926520	+	STM14_998	32	Inter	sense
NC_016856.1_926149	926149	+	gene	926137	926520	+	STM14_998	0	Intra	sense
NC_016856.1_929996	929996	+	gene	929772	930935	+	STM14_1005	0	Intra	sense
NC_016856.1_930048	930048	+	gene	929772	930935	+	STM14_1005	0	Intra	sense
NC_016856.1_930056	930056	+	gene	929772	930935	+	STM14_1005	0	Intra	sense
NC_016856.1_930457	930457	+	gene	929772	930935	+	STM14_1005	0	Intra	sense
NC_016856.1_933988	933988	+	gene	933075	933965	-	STM14_1008	-23	Inter	antisense
NC_016856.1_933998	933998	+	gene	933075	933965	-	STM14_1008	-33	Inter	antisense
NC_016856.1_934449	934449	-	gene	934230	934655	-	STM14_1009	0	Intra	sense
NC_016856.1_934520	934520	-	gene	934230	934655	-	STM14_1009	0	Intra	sense
NC_016856.1_934536	934536	+	gene	934230	934655	-	STM14_1009	0	Intra	antisense
NC_016856.1_936354	936354	-	gene	935679	936305	-	STM14_1012	-49	Inter	sense
NC_016856.1_936441	936441	+	gene	936549	937751	+	STM14_1013	108	Inter	sense
NC_016856.1_936494	936494	+	gene	936549	937751	+	STM14_1013	55	Inter	sense
NC_016856.1_936557	936557	+	gene	936549	937751	+	STM14_1013	0	Intra	sense
NC_016856.1_937818	937818	-	gene	937796	938554	-	STM14_1014	0	Intra	sense
NC_016856.1_939381	939381	-	gene	938626	939234	-	STM14_1015	-147	Inter	sense
NC_016856.1_943346	943346	-	gene	943024	943644	+	STM14_1020	0	Intra	antisense
NC_016856.1_943684	943684	-	gene	943024	943644	+	STM14_1020	-40	Inter	antisense
NC_016856.1_945575	945575	-	gene	943761	945446	-	STM14_1021	-129	Inter	sense
NC_016856.1_945598	945598	+	gene	945717	946094	+	STM14_1022	119	Inter	sense
NC_016856.1_946422	946422	-	gene	946126	946389	-	STM14_1023	-33	Inter	sense
NC_016856.1_947170	947170	+	gene	946833	947555	+	STM14_1025	0	Intra	sense
NC_016856.1_947584	947584	+	gene	946833	947555	+	STM14_1025	-29	Inter	sense
NC_016856.1_947584	947584	+	gene	947613	948515	+	STM14_1026	29	Inter	sense
NC_016856.1_948514	948514	+	gene	947613	948515	+	STM14_1026	0	Intra	sense
NC_016856.1_948572	948572	+	gene	948612	949088	+	STM14_1027	40	Inter	sense
NC_016856.1_948620	948620	+	gene	948612	949088	+	STM14_1027	0	Intra	sense
NC_016856.1_949016	949016	-	gene	948612	949088	+	STM14_1027	0	Intra	antisense
NC_016856.1_949296	949296	+	gene	949437	950549	+	STM14_1028	141	Inter	sense
NC_016856.1_957181	957181	-	gene	956951	957271	+	STM14_1036	0	Intra	antisense
NC_016856.1_958060	958060	+	gene	957281	958768	+	STM14_1037	0	Intra	sense
NC_016856.1_959764	959764	-	gene	958987	959718	-	STM14_1039	-46	Inter	sense
NC_016856.1_960114	960114	-	gene	959955	960623	-	STM14_1040	0	Intra	sense
NC_016856.1_962543	962543	-	gene	962095	962823	-	STM14_1043	0	Intra	sense
NC_016856.1_962859	962859	-	gene	962095	962823	-	STM14_1043	-36	Inter	sense
NC_016856.1_962932	962932	-	gene	962095	962823	-	STM14_1043	-109	Inter	sense
NC_016856.1_962960	962960	+	gene	963053	963568	-	STM14_1044	93	Inter	antisense
NC_016856.1_963600	963600	-	gene	963053	963568	-	STM14_1044	-32	Inter	sense
NC_016856.1_963611	963611	-	gene	963053	963568	-	STM14_1044	-43	Inter	sense
NC_016856.1_963617	963617	+	gene	963053	963568	-	STM14_1044	-49	Inter	antisense
NC_016856.1_963623	963623	-	gene	963053	963568	-	STM14_1044	-55	Inter	sense
NC_016856.1_963633	963633	+	gene	963696	964019	+	STM14_1045	63	Inter	sense
NC_016856.1_963649	963649	+	gene	963696	964019	+	STM14_1045	47	Inter	sense
NC_016856.1_963661	963661	+	gene	963696	964019	+	STM14_1045	35	Inter	sense
NC_016856.1_965884	965884	-	gene	964843	965856	-	STM14_1047	-28	Inter	sense
NC_016856.1_967838	967838	-	gene	967396	968397	-	STM14_1049	0	Intra	sense
NC_016856.1_970182	970182	-	gene	968436	970154	-	STM14_1050	-28	Inter	sense
NC_016856.1_974021	974021	-	gene	973965	974153	+	STM14_1055	0	Intra	antisense
NC_016856.1_974153	974153	+	gene	973965	974153	+	STM14_1055	0	Intra	sense
NC_016856.1_974944	974944	+	gene	974189	975847	+	STM14_1056	0	Intra	sense
NC_016856.1_976785	976785	+	gene	975844	976812	-	STM14_1057	0	Intra	antisense
NC_016856.1_976817	976817	-	gene	975844	976812	-	STM14_1057	-5	Inter	sense
NC_016856.1_976818	976818	-	gene	975844	976812	-	STM14_1057	-6	Inter	sense
NC_016856.1_979439	979439	+	gene	978055	980001	+	STM14_1059	0	Intra	sense
NC_016856.1_980439	980439	-	gene	980131	980352	-	STM14_1062	-87	Inter	sense
NC_016856.1_980594	980594	+	gene	980676	980996	+	STM14_1063	82	Inter	sense
NC_016856.1_980610	980610	+	gene	980676	980996	+	STM14_1063	66	Inter	sense
NC_016856.1_980627	980627	+	gene	980676	980996	+	STM14_1063	49	Inter	sense
NC_016856.1_980672	980672	+	gene	980676	980996	+	STM14_1063	4	Inter	sense
NC_016856.1_980796	980796	+	gene	980676	980996	+	STM14_1063	0	Intra	sense
NC_016856.1_980841	980841	+	gene	980676	980996	+	STM14_1063	0	Intra	sense
NC_016856.1_985859	985859	-	gene	985772	985859	-	STM14_1071	0	Intra	sense
NC_016856.1_987173	987173	-	gene	986705	987565	-	STM14_1073	0	Intra	sense
NC_016856.1_988929	988929	-	gene	988822	989205	-	STM14_1076	0	Intra	sense
NC_016856.1_989162	989162	-	gene	988822	989205	-	STM14_1076	0	Intra	sense
NC_016856.1_989940	989940	-	gene	989955	991676	-	STM14_1078	15	Inter	sense
NC_016856.1_993479	993479	-	gene	991677	993443	-	STM14_1079	-36	Inter	sense
NC_016856.1_993642	993642	-	gene	993557	994525	-	STM14_1080	0	Intra	sense
NC_016856.1_994553	994553	-	gene	993557	994525	-	STM14_1080	-28	Inter	sense
NC_016856.1_994610	994610	-	gene	993557	994525	-	STM14_1080	-85	Inter	sense
NC_016856.1_994803	994803	+	gene	994867	995142	-	STM14_1082	64	Inter	antisense
NC_016856.1_994834	994834	+	gene	994867	995142	-	STM14_1082	33	Inter	antisense
NC_016856.1_995611	995611	+	gene	995071	995565	+	STM14_1083	-46	Inter	sense
NC_016856.1_996207	996207	+	gene	995700	999785	+	STM14_1084	0	Intra	sense
NC_016856.1_996208	996208	+	gene	995700	999785	+	STM14_1084	0	Intra	sense
NC_016856.1_999884	999884	+	gene	999925	1000539	+	STM14_1085	41	Inter	sense
NC_016856.1_1000313	1000313	+	gene	999925	1000539	+	STM14_1085	0	Intra	sense
NC_016856.1_1001803	1001803	+	gene	1000549	1001892	+	STM14_1086	0	Intra	sense
NC_016856.1_1001920	1001920	+	gene	1001889	1002107	-	STM14_RS24585	0	Intra	antisense
NC_016856.1_1006763	1006763	+	gene	1006754	1007617	+	STM14_1091	0	Intra	sense
NC_016856.1_1007937	1007937	+	gene	1007967	1009115	+	STM14_1094	30	Inter	sense
NC_016856.1_1008393	1008393	+	gene	1007967	1009115	+	STM14_1094	0	Intra	sense
NC_016856.1_1009309	1009309	+	gene	1009333	1010754	+	STM14_1095	24	Inter	sense
NC_016856.1_1011071	1011071	-	gene	1011047	1011844	-	STM14_1096	0	Intra	sense
NC_016856.1_1011999	1011999	-	gene	1011963	1012289	-	STM14_1097	0	Intra	sense
NC_016856.1_1012114	1012114	-	gene	1011963	1012289	-	STM14_1097	0	Intra	sense
NC_016856.1_1012342	1012342	+	gene	1011963	1012289	-	STM14_1097	-53	Inter	antisense
NC_016856.1_1014097	1014097	-	gene	1013455	1015737	-	STM14_1099	0	Intra	sense
NC_016856.1_1015704	1015704	+	gene	1013455	1015737	-	STM14_1099	0	Intra	antisense
NC_016856.1_1015726	1015726	+	gene	1013455	1015737	-	STM14_1099	0	Intra	antisense
NC_016856.1_1015856	1015856	-	gene	1015797	1016654	-	STM14_1100	0	Intra	sense
NC_016856.1_1016289	1016289	-	gene	1015797	1016654	-	STM14_1100	0	Intra	sense
NC_016856.1_1016364	1016364	+	gene	1015797	1016654	-	STM14_1100	0	Intra	antisense
NC_016856.1_1016680	1016680	-	gene	1015797	1016654	-	STM14_1100	-26	Inter	sense
NC_016856.1_1016691	1016691	-	gene	1015797	1016654	-	STM14_1100	-37	Inter	sense
NC_016856.1_1019773	1019773	+	gene	1019834	1020922	+	STM14_1105	61	Inter	sense
NC_016856.1_1022769	1022769	+	gene	1022419	1023180	+	STM14_1107	0	Intra	sense
NC_016856.1_1023232	1023232	+	gene	1022419	1023180	+	STM14_1107	-52	Inter	sense
NC_016856.1_1023843	1023843	+	gene	1023353	1024036	+	STM14_1109	0	Intra	sense
NC_016856.1_1024047	1024047	+	gene	1023353	1024036	+	STM14_1109	-11	Inter	sense
NC_016856.1_1024477	1024477	+	gene	1024150	1025823	+	STM14_1110	0	Intra	sense
NC_016856.1_1025518	1025518	+	gene	1024150	1025823	+	STM14_1110	0	Intra	sense
NC_016856.1_1028731	1028731	+	gene	1026493	1028757	+	STM14_1112	0	Intra	sense
NC_016856.1_1028768	1028768	+	gene	1026493	1028757	+	STM14_1112	-11	Inter	sense
NC_016856.1_1028818	1028818	+	gene	1028794	1030542	+	STM14_1113	0	Intra	sense
NC_016856.1_1032815	1032815	+	gene	1031560	1032792	+	STM14_1115	-23	Inter	sense
NC_016856.1_1033954	1033954	+	gene	1033980	1034873	+	STM14_1119	26	Inter	sense
NC_016856.1_1034213	1034213	+	gene	1033980	1034873	+	STM14_1119	0	Intra	sense
NC_016856.1_1034637	1034637	+	gene	1033980	1034873	+	STM14_1119	0	Intra	sense
NC_016856.1_1042183	1042183	+	gene	1038568	1043034	+	STM14_1124	0	Intra	sense
NC_016856.1_1043228	1043228	+	gene	1043379	1045220	+	STM14_1125	151	Inter	sense
NC_016856.1_1045251	1045251	+	pseudogene	1045157	1045371	-	STM14_RS24590	0	Intra	antisense
NC_016856.1_1045349	1045349	+	pseudogene	1045157	1045371	-	STM14_RS24590	0	Intra	antisense
NC_016856.1_1045431	1045431	+	gene	1045480	1046028	+	STM14_1126	49	Inter	sense
NC_016856.1_1045664	1045664	-	gene	1045480	1046028	+	STM14_1126	0	Intra	antisense
NC_016856.1_1045980	1045980	+	gene	1045480	1046028	+	STM14_1126	0	Intra	sense
NC_016856.1_1047960	1047960	-	gene	1046765	1047955	-	STM14_1128	-5	Inter	sense
NC_016856.1_1047990	1047990	-	gene	1046765	1047955	-	STM14_1128	-35	Inter	sense
NC_016856.1_1048286	1048286	-	gene	1048140	1049231	-	STM14_1130	0	Intra	sense
NC_016856.1_1048789	1048789	-	gene	1048140	1049231	-	STM14_1130	0	Intra	sense
NC_016856.1_1049343	1049343	-	gene	1048140	1049231	-	STM14_1130	-112	Inter	sense
NC_016856.1_1049728	1049728	+	gene	1049838	1051238	-	STM14_1132	110	Inter	antisense
NC_016856.1_1049947	1049947	-	gene	1049838	1051238	-	STM14_1132	0	Intra	sense
NC_016856.1_1051249	1051249	-	gene	1049838	1051238	-	STM14_1132	-11	Inter	sense
NC_016856.1_1051297	1051297	-	gene	1049838	1051238	-	STM14_1132	-59	Inter	sense
NC_016856.1_1051857	1051857	-	gene	1051439	1051900	-	STM14_1134	0	Intra	sense
NC_016856.1_1052020	1052020	-	gene	1051897	1052130	-	STM14_1135	0	Intra	sense
NC_016856.1_1052042	1052042	+	gene	1051897	1052130	-	STM14_1135	0	Intra	antisense
NC_016856.1_1056891	1056891	+	gene	1056587	1057927	-	STM14_1140	0	Intra	antisense
NC_016856.1_1057565	1057565	+	gene	1056587	1057927	-	STM14_1140	0	Intra	antisense
NC_016856.1_1057903	1057903	-	gene	1056587	1057927	-	STM14_1140	0	Intra	sense
NC_016856.1_1063481	1063481	-	gene	1063409	1063819	-	STM14_1148	0	Intra	sense
NC_016856.1_1063819	1063819	-	gene	1063409	1063819	-	STM14_1148	0	Intra	sense
NC_016856.1_1064885	1064885	-	gene	1064603	1065586	+	STM14_1151	0	Intra	antisense
NC_016856.1_1066933	1066933	+	gene	1066693	1067004	+	STM14_1154	0	Intra	sense
NC_016856.1_1067059	1067059	+	gene	1067082	1067372	+	STM14_1155	23	Inter	sense
NC_016856.1_1067162	1067162	-	gene	1067082	1067372	+	STM14_1155	0	Intra	antisense
NC_016856.1_1067221	1067221	-	gene	1067082	1067372	+	STM14_1155	0	Intra	antisense
NC_016856.1_1067313	1067313	+	gene	1067082	1067372	+	STM14_1155	0	Intra	sense
NC_016856.1_1067637	1067637	+	gene	1067664	1067897	+	STM14_1156	27	Inter	sense
NC_016856.1_1068069	1068069	+	gene	1068009	1068230	+	STM14_1157	0	Intra	sense
NC_016856.1_1069961	1069961	+	gene	1069868	1070665	+	STM14_1162	0	Intra	sense
NC_016856.1_1070586	1070586	+	gene	1069868	1070665	+	STM14_1162	0	Intra	sense
NC_016856.1_1070718	1070718	+	gene	1070732	1071049	+	STM14_1163	14	Inter	sense
NC_016856.1_1071368	1071368	-	gene	1071223	1071348	+	STM14_1164	-20	Inter	antisense
NC_016856.1_1072677	1072677	-	gene	1072294	1072980	-	STM14_1166	0	Intra	sense
NC_016856.1_1072702	1072702	-	gene	1072294	1072980	-	STM14_1166	0	Intra	sense
NC_016856.1_1073008	1073008	-	gene	1072294	1072980	-	STM14_1166	-28	Inter	sense
NC_016856.1_1073174	1073174	-	gene	1073256	1073585	+	STM14_1167	82	Inter	antisense
NC_016856.1_1073607	1073607	+	gene	1073569	1074021	+	STM14_1168	0	Intra	sense
NC_016856.1_1075050	1075050	+	gene	1074726	1075259	+	STM14_1170	0	Intra	sense
NC_016856.1_1083472	1083472	-	gene	1082769	1083518	+	STM14_1178	0	Intra	antisense
NC_016856.1_1085648	1085648	+	gene	1084368	1087355	+	STM14_1181	0	Intra	sense
NC_016856.1_1087738	1087738	+	gene	1087783	1088280	+	STM14_1183	45	Inter	sense
NC_016856.1_1087752	1087752	+	gene	1087783	1088280	+	STM14_1183	31	Inter	sense
NC_016856.1_1087769	1087769	+	gene	1087783	1088280	+	STM14_1183	14	Inter	sense
NC_016856.1_1087951	1087951	+	gene	1087783	1088280	+	STM14_1183	0	Intra	sense
NC_016856.1_1088716	1088716	+	gene	1088397	1088930	-	STM14_1184	0	Intra	antisense
NC_016856.1_1088865	1088865	+	gene	1088397	1088930	-	STM14_1184	0	Intra	antisense
NC_016856.1_1088956	1088956	-	gene	1088397	1088930	-	STM14_1184	-26	Inter	sense
NC_016856.1_1089733	1089733	-	gene	1089725	1090462	+	STM14_1186	0	Intra	antisense
NC_016856.1_1093347	1093347	-	gene	1092981	1094486	+	STM14_RS25925	0	Intra	antisense
NC_016856.1_1101776	1101776	+	gene	1101868	1102059	-	STM14_1198	92	Inter	antisense
NC_016856.1_1102086	1102086	-	gene	1101868	1102059	-	STM14_1198	-27	Inter	sense
NC_016856.1_1102378	1102378	+	gene	1102486	1105098	+	STM14_1199	108	Inter	sense
NC_016856.1_1102454	1102454	+	gene	1102486	1105098	+	STM14_1199	32	Inter	sense
NC_016856.1_1106381	1106381	+	gene	1105306	1106316	+	STM14_1200	-65	Inter	sense
NC_016856.1_1106382	1106382	+	gene	1105306	1106316	+	STM14_1200	-66	Inter	sense
NC_016856.1_1106419	1106419	+	gene	1106482	1107024	+	STM14_1202	63	Inter	sense
NC_016856.1_1108203	1108203	+	gene	1108229	1110337	+	STM14_1204	26	Inter	sense
NC_016856.1_1112615	1112615	-	gene	1112272	1113525	+	STM14_1206	0	Intra	antisense
NC_016856.1_1114373	1114373	-	gene	1113530	1115170	+	STM14_1207	0	Intra	antisense
NC_016856.1_1114959	1114959	-	gene	1113530	1115170	+	STM14_1207	0	Intra	antisense
NC_016856.1_1115928	1115928	+	gene	1115985	1116152	+	STM14_1210	57	Inter	sense
NC_016856.1_1118627	1118627	-	gene	1116839	1118599	-	STM14_1212	-28	Inter	sense
NC_016856.1_1118710	1118710	+	gene	1118785	1119237	+	STM14_1213	75	Inter	sense
NC_016856.1_1118759	1118759	+	gene	1118785	1119237	+	STM14_1213	26	Inter	sense
NC_016856.1_1120512	1120512	+	gene	1119309	1120361	-	STM14_1214	-151	Inter	antisense
NC_016856.1_1121256	1121256	-	gene	1120718	1121227	-	STM14_1215	-29	Inter	sense
NC_016856.1_1121390	1121390	+	gene	1121444	1122049	+	STM14_1217	54	Inter	sense
NC_016856.1_1123872	1123872	-	gene	1122036	1124189	-	STM14_1218	0	Intra	sense
NC_016856.1_1123964	1123964	-	gene	1122036	1124189	-	STM14_1218	0	Intra	sense
NC_016856.1_1124686	1124686	-	gene	1124208	1124654	-	STM14_1219	-32	Inter	sense
NC_016856.1_1124750	1124750	+	gene	1124778	1126832	+	STM14_1220	28	Inter	sense
NC_016856.1_1127348	1127348	-	gene	1126868	1127326	-	STM14_1221	-22	Inter	sense
NC_016856.1_1128108	1128108	-	gene	1127421	1128083	-	STM14_1222	-25	Inter	sense
NC_016856.1_1128109	1128109	-	gene	1127421	1128083	-	STM14_1222	-26	Inter	sense
NC_016856.1_1128145	1128145	-	gene	1127421	1128083	-	STM14_1222	-62	Inter	sense
NC_016856.1_1128147	1128147	-	gene	1127421	1128083	-	STM14_1222	-64	Inter	sense
NC_016856.1_1128158	1128158	+	gene	1127421	1128083	-	STM14_1222	-75	Inter	antisense
NC_016856.1_1128191	1128191	+	gene	1128254	1128670	+	STM14_1223	63	Inter	sense
NC_016856.1_1128193	1128193	+	gene	1128254	1128670	+	STM14_1223	61	Inter	sense
NC_016856.1_1128236	1128236	+	gene	1128254	1128670	+	STM14_1223	18	Inter	sense
NC_016856.1_1129178	1129178	-	gene	1129090	1130301	-	STM14_1225	0	Intra	sense
NC_016856.1_1129658	1129658	-	gene	1129090	1130301	-	STM14_1225	0	Intra	sense
NC_016856.1_1132549	1132549	-	gene	1132196	1132525	-	STM14_1229	-24	Inter	sense
NC_016856.1_1133661	1133661	+	gene	1133666	1133753	+	STM14_1231	5	Inter	sense
NC_016856.1_1133729	1133729	+	gene	1133666	1133753	+	STM14_1231	0	Intra	sense
NC_016856.1_1133822	1133822	+	gene	1133666	1133753	+	STM14_1231	-69	Inter	sense
NC_016856.1_1133842	1133842	+	gene	1133892	1134572	-	STM14_1232	50	Inter	antisense
NC_016856.1_1133905	1133905	+	gene	1133892	1134572	-	STM14_1232	0	Intra	antisense
NC_016856.1_1134306	1134306	-	gene	1133892	1134572	-	STM14_1232	0	Intra	sense
NC_016856.1_1134373	1134373	-	gene	1133892	1134572	-	STM14_1232	0	Intra	sense
NC_016856.1_1138475	1138475	-	gene	1138592	1138762	+	STM14_1238	117	Inter	antisense
NC_016856.1_1138563	1138563	+	gene	1138592	1138762	+	STM14_1238	29	Inter	sense
NC_016856.1_1140485	1140485	+	gene	1138982	1140451	-	STM14_1240	-34	Inter	antisense
NC_016856.1_1140561	1140561	+	gene	1140624	1141988	-	STM14_1241	63	Inter	antisense
NC_016856.1_1142661	1142661	-	gene	1141981	1142727	-	STM14_1242	0	Intra	sense
NC_016856.1_1142702	1142702	-	gene	1141981	1142727	-	STM14_1242	0	Intra	sense
NC_016856.1_1143425	1143425	+	gene	1143361	1143543	+	STM14_1245	0	Intra	sense
NC_016856.1_1144791	1144791	-	gene	1144070	1145632	-	STM14_1247	0	Intra	sense
NC_016856.1_1144793	1144793	-	gene	1144070	1145632	-	STM14_1247	0	Intra	sense
NC_016856.1_1145725	1145725	+	gene	1144070	1145632	-	STM14_1247	-93	Inter	antisense
NC_016856.1_1150547	1150547	-	gene	1150180	1150560	+	STM14_1253	0	Intra	antisense
NC_016856.1_1154990	1154990	+	gene	1154676	1155614	+	STM14_1259	0	Intra	sense
NC_016856.1_1156937	1156937	+	gene	1156832	1156987	+	STM14_1262	0	Intra	sense
NC_016856.1_1158228	1158228	-	gene	1157343	1158263	-	STM14_1264	0	Intra	sense
NC_016856.1_1158319	1158319	-	gene	1157343	1158263	-	STM14_1264	-56	Inter	sense
NC_016856.1_1158479	1158479	+	gene	1158383	1158577	-	STM14_1265	0	Intra	antisense
NC_016856.1_1162016	1162016	+	gene	1162044	1163285	+	STM14_1270	28	Inter	sense
NC_016856.1_1164170	1164170	-	gene	1163567	1164163	-	STM14_1272	-7	Inter	sense
NC_016856.1_1164210	1164210	-	gene	1163567	1164163	-	STM14_1272	-47	Inter	sense
NC_016856.1_1165918	1165918	-	gene	1165941	1169903	-	STM14_1278	23	Inter	sense
NC_016856.1_1169946	1169946	-	gene	1165941	1169903	-	STM14_1278	-43	Inter	sense
NC_016856.1_1170192	1170192	+	gene	1170030	1170278	-	STM14_1279	0	Intra	antisense
NC_016856.1_1171335	1171335	+	gene	1170325	1171833	+	STM14_1281	0	Intra	sense
NC_016856.1_1171659	1171659	+	gene	1170325	1171833	+	STM14_1281	0	Intra	sense
NC_016856.1_1172182	1172182	-	gene	1172451	1172747	+	STM14_1283	269	Inter	antisense
NC_016856.1_1172313	1172313	+	gene	1172451	1172747	+	STM14_1283	138	Inter	sense
NC_016856.1_1172401	1172401	+	gene	1172451	1172747	+	STM14_1283	50	Inter	sense
NC_016856.1_1173506	1173506	-	gene	1172660	1173514	+	STM14_1284	0	Intra	antisense
NC_016856.1_1174281	1174281	-	gene	1173620	1174501	-	STM14_1285	0	Intra	sense
NC_016856.1_1174553	1174553	-	gene	1173620	1174501	-	STM14_1285	-52	Inter	sense
NC_016856.1_1175738	1175738	-	gene	1174786	1176282	-	STM14_1287	0	Intra	sense
NC_016856.1_1175765	1175765	-	gene	1174786	1176282	-	STM14_1287	0	Intra	sense
NC_016856.1_1181806	1181806	+	gene	1181277	1182383	+	STM14_1296	0	Intra	sense
NC_016856.1_1182990	1182990	-	gene	1182903	1182990	-	STM14_1297	0	Intra	sense
NC_016856.1_1184229	1184229	+	gene	1184250	1184987	+	STM14_1300	21	Inter	sense
NC_016856.1_1184307	1184307	-	gene	1184250	1184987	+	STM14_1300	0	Intra	antisense
NC_016856.1_1185666	1185666	+	gene	1185618	1186148	+	STM14_1302	0	Intra	sense
NC_016856.1_1186220	1186220	-	gene	1186187	1187020	-	STM14_1303	0	Intra	sense
NC_016856.1_1186282	1186282	-	gene	1186187	1187020	-	STM14_1303	0	Intra	sense
NC_016856.1_1188688	1188688	-	gene	1187890	1188540	-	STM14_1306	-148	Inter	sense
NC_016856.1_1190551	1190551	+	gene	1190309	1190635	+	STM14_1311	0	Intra	sense
NC_016856.1_1191647	1191647	+	gene	1191175	1191714	+	STM14_1313	0	Intra	sense
NC_016856.1_1191661	1191661	+	gene	1191175	1191714	+	STM14_1313	0	Intra	sense
NC_016856.1_1191661	1191661	+	gene	1191650	1193137	+	STM14_1314	0	Intra	sense
NC_016856.1_1191872	1191872	+	gene	1191650	1193137	+	STM14_1314	0	Intra	sense
NC_016856.1_1194346	1194346	-	gene	1193154	1194308	-	STM14_1315	-38	Inter	sense
NC_016856.1_1194368	1194368	-	gene	1193154	1194308	-	STM14_1315	-60	Inter	sense
NC_016856.1_1194511	1194511	+	gene	1194580	1196115	+	STM14_1317	69	Inter	sense
NC_016856.1_1194760	1194760	-	gene	1194580	1196115	+	STM14_1317	0	Intra	antisense
NC_016856.1_1196956	1196956	-	gene	1196108	1198651	+	STM14_1318	0	Intra	antisense
NC_016856.1_1199358	1199358	-	gene	1198953	1199327	-	STM14_1320	-31	Inter	sense
NC_016856.1_1199449	1199449	+	gene	1199409	1200623	-	STM14_1321	0	Intra	antisense
NC_016856.1_1200000	1200000	-	gene	1199409	1200623	-	STM14_1321	0	Intra	sense
NC_016856.1_1200681	1200681	-	pseudogene	1200586	1200815	+	STM14_RS24640	0	Intra	antisense
NC_016856.1_1201725	1201725	-	gene	1200778	1201698	-	STM14_1323	-27	Inter	sense
NC_016856.1_1205724	1205724	-	gene	1204583	1205701	-	STM14_1329	-23	Inter	sense
NC_016856.1_1206136	1206136	-	gene	1205814	1206068	-	STM14_1330	-68	Inter	sense
NC_016856.1_1206145	1206145	-	gene	1205814	1206068	-	STM14_1330	-77	Inter	sense
NC_016856.1_1206623	1206623	-	gene	1206358	1206603	-	STM14_1331	-20	Inter	sense
NC_016856.1_1208043	1208043	-	gene	1207828	1208388	-	STM14_1333	0	Intra	sense
NC_016856.1_1208412	1208412	-	gene	1207828	1208388	-	STM14_1333	-24	Inter	sense
NC_016856.1_1208696	1208696	+	gene	1208513	1209160	-	STM14_1334	0	Intra	antisense
NC_016856.1_1209187	1209187	-	gene	1208513	1209160	-	STM14_1334	-27	Inter	sense
NC_016856.1_1210460	1210460	-	gene	1209224	1210432	-	STM14_1335	-28	Inter	sense
NC_016856.1_1210628	1210628	+	gene	1210669	1211253	+	STM14_1336	41	Inter	sense
NC_016856.1_1212916	1212916	+	gene	1211938	1212861	+	STM14_1338	-55	Inter	sense
NC_016856.1_1215160	1215160	+	gene	1214782	1215204	-	STM14_1341	0	Intra	antisense
NC_016856.1_1215554	1215554	-	gene	1215594	1216253	-	STM14_1343	40	Inter	sense
NC_016856.1_1215587	1215587	-	gene	1215594	1216253	-	STM14_1343	7	Inter	sense
NC_016856.1_1217194	1217194	-	gene	1216830	1217234	+	STM14_1346	0	Intra	antisense
NC_016856.1_1223607	1223607	+	gene	1223631	1225292	+	STM14_1354	24	Inter	sense
NC_016856.1_1224648	1224648	+	gene	1223631	1225292	+	STM14_1354	0	Intra	sense
NC_016856.1_1230082	1230082	-	gene	1229856	1230104	+	STM14_RS06430	0	Intra	antisense
NC_016856.1_1230294	1230294	+	gene	1230294	1231253	+	STM14_1359	0	Intra	sense
NC_016856.1_1233291	1233291	+	gene	1232654	1233238	-	STM14_1362	-53	Inter	antisense
NC_016856.1_1233320	1233320	+	gene	1232654	1233238	-	STM14_1362	-82	Inter	antisense
NC_016856.1_1233342	1233342	-	gene	1233436	1233957	+	STM14_1363	94	Inter	antisense
NC_016856.1_1233436	1233436	+	gene	1233436	1233957	+	STM14_1363	0	Intra	sense
NC_016856.1_1233857	1233857	+	gene	1233436	1233957	+	STM14_1363	0	Intra	sense
NC_016856.1_1234364	1234364	+	gene	1234316	1235395	+	STM14_1365	0	Intra	sense
NC_016856.1_1234436	1234436	-	gene	1234316	1235395	+	STM14_1365	0	Intra	antisense
NC_016856.1_1235085	1235085	+	gene	1234316	1235395	+	STM14_1365	0	Intra	sense
NC_016856.1_1237210	1237210	+	gene	1236444	1237373	+	STM14_1367	0	Intra	sense
NC_016856.1_1237219	1237219	+	gene	1236444	1237373	+	STM14_1367	0	Intra	sense
NC_016856.1_1237641	1237641	+	gene	1237386	1238120	+	STM14_1368	0	Intra	sense
NC_016856.1_1237650	1237650	+	gene	1237386	1238120	+	STM14_1368	0	Intra	sense
NC_016856.1_1237673	1237673	+	gene	1237386	1238120	+	STM14_1368	0	Intra	sense
NC_016856.1_1237917	1237917	+	gene	1237386	1238120	+	STM14_1368	0	Intra	sense
NC_016856.1_1238173	1238173	+	gene	1237386	1238120	+	STM14_1368	-53	Inter	sense
NC_016856.1_1238184	1238184	+	gene	1237386	1238120	+	STM14_1368	-64	Inter	sense
NC_016856.1_1238237	1238237	+	gene	1238276	1238512	+	STM14_1369	39	Inter	sense
NC_016856.1_1238438	1238438	+	gene	1238276	1238512	+	STM14_1369	0	Intra	sense
NC_016856.1_1239945	1239945	+	gene	1239963	1240772	+	STM14_1371	18	Inter	sense
NC_016856.1_1241552	1241552	+	gene	1240775	1241797	+	STM14_1372	0	Intra	sense
NC_016856.1_1243452	1243452	+	gene	1243440	1244237	+	STM14_1375	0	Intra	sense
NC_016856.1_1243913	1243913	+	gene	1243440	1244237	+	STM14_1375	0	Intra	sense
NC_016856.1_1246533	1246533	+	gene	1246050	1248224	-	STM14_1378	0	Intra	antisense
NC_016856.1_1248507	1248507	+	gene	1248566	1248925	+	STM14_1379	59	Inter	sense
NC_016856.1_1248536	1248536	+	gene	1248566	1248925	+	STM14_1379	30	Inter	sense
NC_016856.1_1250465	1250465	+	gene	1249935	1250759	+	STM14_1382	0	Intra	sense
NC_016856.1_1251620	1251620	+	gene	1250770	1251795	+	STM14_1383	0	Intra	sense
NC_016856.1_1251691	1251691	+	gene	1250770	1251795	+	STM14_1383	0	Intra	sense
NC_016856.1_1253701	1253701	+	gene	1252617	1253921	+	STM14_1385	0	Intra	sense
NC_016856.1_1254076	1254076	+	gene	1254100	1254639	+	STM14_1386	24	Inter	sense
NC_016856.1_1255536	1255536	+	gene	1255591	1255848	+	STM14_1388	55	Inter	sense
NC_016856.1_1258035	1258035	-	gene	1257058	1260504	-	STM14_1391	0	Intra	sense
NC_016856.1_1260636	1260636	-	gene	1260731	1262041	+	STM14_1392	95	Inter	antisense
NC_016856.1_1261893	1261893	+	gene	1260731	1262041	+	STM14_1392	0	Intra	sense
NC_016856.1_1263658	1263658	+	gene	1262735	1263979	+	STM14_1394	0	Intra	sense
NC_016856.1_1265856	1265856	-	gene	1265841	1266887	-	STM14_1397	0	Intra	sense
NC_016856.1_1267708	1267708	-	gene	1266912	1267691	-	STM14_1398	-17	Inter	sense
NC_016856.1_1267827	1267827	-	gene	1266912	1267691	-	STM14_1398	-136	Inter	sense
NC_016856.1_1268450	1268450	-	gene	1268007	1269017	-	STM14_1400	0	Intra	sense
NC_016856.1_1271472	1271472	+	pseudogene	1271308	1271524	-	STM14_RS24655	0	Intra	antisense
NC_016856.1_1271559	1271559	+	gene	1271580	1272809	+	STM14_1404	21	Inter	sense
NC_016856.1_1272724	1272724	+	gene	1271580	1272809	+	STM14_1404	0	Intra	sense
NC_016856.1_1274726	1274726	+	gene	1273569	1274858	+	STM14_RS06650	0	Intra	sense
NC_016856.1_1276044	1276044	-	gene	1274898	1276019	-	STM14_1407	-25	Inter	sense
NC_016856.1_1278260	1278260	-	gene	1277563	1278237	-	STM14_1409	-23	Inter	sense
NC_016856.1_1278271	1278271	-	gene	1277563	1278237	-	STM14_1409	-34	Inter	sense
NC_016856.1_1280849	1280849	-	gene	1280463	1281569	-	STM14_1412	0	Intra	sense
NC_016856.1_1283097	1283097	+	gene	1282422	1283087	-	STM14_1415	-10	Inter	antisense
NC_016856.1_1283144	1283144	+	gene	1282422	1283087	-	STM14_1415	-57	Inter	antisense
NC_016856.1_1284683	1284683	+	gene	1284622	1285764	-	STM14_1417	0	Intra	antisense
NC_016856.1_1285375	1285375	-	gene	1284622	1285764	-	STM14_1417	0	Intra	sense
NC_016856.1_1285475	1285475	-	gene	1284622	1285764	-	STM14_1417	0	Intra	sense
NC_016856.1_1285708	1285708	-	gene	1284622	1285764	-	STM14_1417	0	Intra	sense
NC_016856.1_1285727	1285727	+	gene	1284622	1285764	-	STM14_1417	0	Intra	antisense
NC_016856.1_1287187	1287187	-	gene	1286913	1287233	-	STM14_1421	0	Intra	sense
NC_016856.1_1291366	1291366	-	gene	1291515	1291721	+	STM14_1427	149	Inter	antisense
NC_016856.1_1291492	1291492	+	gene	1291515	1291721	+	STM14_1427	23	Inter	sense
NC_016856.1_1291813	1291813	+	gene	1291829	1292914	-	STM14_1428	16	Inter	antisense
NC_016856.1_1291954	1291954	-	gene	1291829	1292914	-	STM14_1428	0	Intra	sense
NC_016856.1_1292328	1292328	-	gene	1291829	1292914	-	STM14_1428	0	Intra	sense
NC_016856.1_1292905	1292905	-	gene	1291829	1292914	-	STM14_1428	0	Intra	sense
NC_016856.1_1293449	1293449	-	gene	1293066	1293533	-	STM14_1429	0	Intra	sense
NC_016856.1_1293532	1293532	+	gene	1293066	1293533	-	STM14_1429	0	Intra	antisense
NC_016856.1_1298211	1298211	-	gene	1297994	1298185	+	STM14_1438	-26	Inter	antisense
NC_016856.1_1298417	1298417	+	gene	1298444	1298677	+	STM14_1439	27	Inter	sense
NC_016856.1_1298845	1298845	+	gene	1298794	1299042	+	STM14_1440	0	Intra	sense
NC_016856.1_1300837	1300837	+	gene	1300693	1300881	+	STM14_1445	0	Intra	sense
NC_016856.1_1301570	1301570	+	gene	1301443	1301631	-	STM14_RS24680	0	Intra	antisense
NC_016856.1_1301746	1301746	+	gene	1301766	1301954	+	STM14_1447	20	Inter	sense
NC_016856.1_1301748	1301748	+	gene	1301766	1301954	+	STM14_1447	18	Inter	sense
NC_016856.1_1302336	1302336	-	gene	1302338	1302805	-	STM14_1449	2	Inter	sense
NC_016856.1_1302729	1302729	-	gene	1302338	1302805	-	STM14_1449	0	Intra	sense
NC_016856.1_1304043	1304043	-	gene	1304183	1304647	+	STM14_1453	140	Inter	antisense
NC_016856.1_1305453	1305453	-	gene	1305561	1306106	+	STM14_1455	108	Inter	antisense
NC_016856.1_1306802	1306802	+	gene	1306078	1308009	+	STM14_1456	0	Intra	sense
NC_016856.1_1308381	1308381	-	gene	1308193	1309773	+	STM14_1458	0	Intra	antisense
NC_016856.1_1315303	1315303	-	gene	1314173	1315423	-	STM14_1465	0	Intra	sense
NC_016856.1_1318000	1318000	-	gene	1317320	1320415	+	STM14_1470	0	Intra	antisense
NC_016856.1_1321227	1321227	+	gene	1320757	1321455	+	STM14_1472	0	Intra	sense
NC_016856.1_1329880	1329880	-	gene	1329626	1329826	-	STM14_1480	-54	Inter	sense
NC_016856.1_1330751	1330751	+	pseudogene	1330854	1331879	+	STM14_1482	103	Inter	sense
NC_016856.1_1331784	1331784	+	pseudogene	1330854	1331879	+	STM14_1482	0	Intra	sense
NC_016856.1_1335163	1335163	-	gene	1334473	1335144	-	STM14_1484	-19	Inter	sense
NC_016856.1_1335165	1335165	-	gene	1334473	1335144	-	STM14_1484	-21	Inter	sense
NC_016856.1_1335276	1335276	+	gene	1334473	1335144	-	STM14_1484	-132	Inter	antisense
NC_016856.1_1335740	1335740	-	gene	1335446	1335610	+	STM14_1485	-130	Inter	antisense
NC_016856.1_1335785	1335785	-	gene	1335446	1335610	+	STM14_1485	-175	Inter	antisense
NC_016856.1_1335806	1335806	-	gene	1335446	1335610	+	STM14_1485	-196	Inter	antisense
NC_016856.1_1338509	1338509	+	gene	1338164	1338952	-	STM14_1490	0	Intra	antisense
NC_016856.1_1339706	1339706	-	gene	1339441	1339680	-	STM14_1492	-26	Inter	sense
NC_016856.1_1339792	1339792	+	gene	1339871	1340392	-	STM14_1493	79	Inter	antisense
NC_016856.1_1341042	1341042	-	gene	1340807	1341019	-	STM14_1495	-23	Inter	sense
NC_016856.1_1341668	1341668	+	pseudogene	1341463	1341654	+	STM14_1498	-14	Inter	sense
NC_016856.1_1342921	1342921	-	gene	1342226	1342783	+	STM14_1501	-138	Inter	antisense
NC_016856.1_1343109	1343109	+	gene	1343189	1343265	+	STM14_1503	80	Inter	sense
NC_016856.1_1343267	1343267	-	gene	1343189	1343265	+	STM14_1503	-2	Inter	antisense
NC_016856.1_1343437	1343437	+	gene	1343189	1343265	+	STM14_1503	-172	Inter	sense
NC_016856.1_1343447	1343447	+	gene	1343189	1343265	+	STM14_1503	-182	Inter	sense
NC_016856.1_1343471	1343471	+	gene	1343189	1343265	+	STM14_1503	-206	Inter	sense
NC_016856.1_1344698	1344698	+	gene	1344742	1344867	+	STM14_1507	44	Inter	sense
NC_016856.1_1344727	1344727	-	gene	1344742	1344867	+	STM14_1507	15	Inter	antisense
NC_016856.1_1344745	1344745	+	gene	1344742	1344867	+	STM14_1507	0	Intra	sense
NC_016856.1_1345090	1345090	+	gene	1345067	1345339	+	STM14_1508	0	Intra	sense
NC_016856.1_1345121	1345121	+	gene	1345067	1345339	+	STM14_1508	0	Intra	sense
NC_016856.1_1345725	1345725	+	gene	1345488	1345958	+	STM14_1509	0	Intra	sense
NC_016856.1_1345786	1345786	+	gene	1345488	1345958	+	STM14_1509	0	Intra	sense
NC_016856.1_1345842	1345842	+	gene	1345488	1345958	+	STM14_1509	0	Intra	sense
NC_016856.1_1346578	1346578	+	gene	1346297	1347340	+	STM14_1511	0	Intra	sense
NC_016856.1_1346887	1346887	+	gene	1346297	1347340	+	STM14_1511	0	Intra	sense
NC_016856.1_1347328	1347328	+	gene	1346297	1347340	+	STM14_1511	0	Intra	sense
NC_016856.1_1347977	1347977	-	gene	1347423	1347953	-	STM14_1512	-24	Inter	sense
NC_016856.1_1348179	1348179	-	gene	1348102	1348416	-	STM14_1513	0	Intra	sense
NC_016856.1_1350748	1350748	+	gene	1350732	1351706	+	STM14_1516	0	Intra	sense
NC_016856.1_1354660	1354660	-	gene	1353965	1355098	-	STM14_1520	0	Intra	sense
NC_016856.1_1355125	1355125	-	gene	1353965	1355098	-	STM14_1520	-27	Inter	sense
NC_016856.1_1357419	1357419	+	gene	1356571	1357359	+	STM14_1525	-60	Inter	sense
NC_016856.1_1359982	1359982	+	gene	1359828	1360373	+	STM14_1531	0	Intra	sense
NC_016856.1_1360534	1360534	+	gene	1360570	1361208	+	STM14_1532	36	Inter	sense
NC_016856.1_1361122	1361122	+	gene	1360570	1361208	+	STM14_1532	0	Intra	sense
NC_016856.1_1361650	1361650	-	gene	1361381	1361743	+	STM14_1534	0	Intra	antisense
NC_016856.1_1363073	1363073	+	gene	1362921	1363106	+	STM14_1538	0	Intra	sense
NC_016856.1_1363099	1363099	+	gene	1362921	1363106	+	STM14_1538	0	Intra	sense
NC_016856.1_1363167	1363167	+	gene	1363114	1363362	+	STM14_1539	0	Intra	sense
NC_016856.1_1363771	1363771	+	gene	1363795	1364046	+	STM14_1542	24	Inter	sense
NC_016856.1_1364078	1364078	+	gene	1363795	1364046	+	STM14_1542	-32	Inter	sense
NC_016856.1_1364080	1364080	+	gene	1363795	1364046	+	STM14_1542	-34	Inter	sense
NC_016856.1_1367409	1367409	-	gene	1366937	1367383	-	STM14_1549	-26	Inter	sense
NC_016856.1_1369276	1369276	+	gene	1368261	1369754	-	STM14_1553	0	Intra	antisense
NC_016856.1_1369781	1369781	-	gene	1368261	1369754	-	STM14_1553	-27	Inter	sense
NC_016856.1_1369997	1369997	+	gene	1368261	1369754	-	STM14_1553	-243	Inter	antisense
NC_016856.1_1370314	1370314	-	gene	1370395	1371681	-	STM14_1556	81	Inter	sense
NC_016856.1_1370350	1370350	+	gene	1370395	1371681	-	STM14_1556	45	Inter	antisense
NC_016856.1_1370438	1370438	+	gene	1370395	1371681	-	STM14_1556	0	Intra	antisense
NC_016856.1_1370703	1370703	-	gene	1370395	1371681	-	STM14_1556	0	Intra	sense
NC_016856.1_1371959	1371959	-	gene	1371804	1373738	-	STM14_1558	0	Intra	sense
NC_016856.1_1373484	1373484	+	gene	1371804	1373738	-	STM14_1558	0	Intra	antisense
NC_016856.1_1373730	1373730	-	gene	1371804	1373738	-	STM14_1558	0	Intra	sense
NC_016856.1_1373747	1373747	+	gene	1371804	1373738	-	STM14_1558	-9	Inter	antisense
NC_016856.1_1373782	1373782	-	gene	1371804	1373738	-	STM14_1558	-44	Inter	sense
NC_016856.1_1373905	1373905	-	gene	1371804	1373738	-	STM14_1558	-167	Inter	sense
NC_016856.1_1374082	1374082	+	gene	1374166	1374912	+	STM14_1560	84	Inter	sense
NC_016856.1_1374094	1374094	+	gene	1374166	1374912	+	STM14_1560	72	Inter	sense
NC_016856.1_1374105	1374105	+	gene	1374166	1374912	+	STM14_1560	61	Inter	sense
NC_016856.1_1374136	1374136	+	gene	1374166	1374912	+	STM14_1560	30	Inter	sense
NC_016856.1_1374301	1374301	+	gene	1374166	1374912	+	STM14_1560	0	Intra	sense
NC_016856.1_1374423	1374423	+	gene	1374166	1374912	+	STM14_1560	0	Intra	sense
NC_016856.1_1376451	1376451	+	gene	1376495	1377352	+	STM14_1562	44	Inter	sense
NC_016856.1_1377016	1377016	-	gene	1376495	1377352	+	STM14_1562	0	Intra	antisense
NC_016856.1_1377446	1377446	-	gene	1377451	1378335	-	STM14_1563	5	Inter	sense
NC_016856.1_1379540	1379540	-	gene	1378670	1379665	-	STM14_1565	0	Intra	sense
NC_016856.1_1379701	1379701	-	gene	1378670	1379665	-	STM14_1565	-36	Inter	sense
NC_016856.1_1379909	1379909	-	gene	1379977	1380420	+	STM14_1567	68	Inter	antisense
NC_016856.1_1379922	1379922	+	gene	1379977	1380420	+	STM14_1567	55	Inter	sense
NC_016856.1_1379941	1379941	+	gene	1379977	1380420	+	STM14_1567	36	Inter	sense
NC_016856.1_1379960	1379960	+	gene	1379977	1380420	+	STM14_1567	17	Inter	sense
NC_016856.1_1379972	1379972	+	gene	1379977	1380420	+	STM14_1567	5	Inter	sense
NC_016856.1_1382802	1382802	+	gene	1381774	1382790	-	STM14_1571	-12	Inter	antisense
NC_016856.1_1382805	1382805	+	gene	1381774	1382790	-	STM14_1571	-15	Inter	antisense
NC_016856.1_1382812	1382812	+	gene	1381774	1382790	-	STM14_1571	-22	Inter	antisense
NC_016856.1_1384800	1384800	-	gene	1382886	1384742	-	STM14_1573	-58	Inter	sense
NC_016856.1_1384891	1384891	+	gene	1384916	1385467	+	STM14_1574	25	Inter	sense
NC_016856.1_1390167	1390167	+	gene	1390194	1390469	+	STM14_1578	27	Inter	sense
NC_016856.1_1391284	1391284	-	gene	1390918	1391724	-	STM14_1580	0	Intra	sense
NC_016856.1_1391753	1391753	-	gene	1390918	1391724	-	STM14_1580	-29	Inter	sense
NC_016856.1_1398321	1398321	+	gene	1398234	1398449	+	STM14_1587	0	Intra	sense
NC_016856.1_1399997	1399997	-	gene	1399093	1400001	-	STM14_1589	0	Intra	sense
NC_016856.1_1400112	1400112	-	gene	1400095	1400922	-	STM14_1590	0	Intra	sense
NC_016856.1_1400958	1400958	-	gene	1400095	1400922	-	STM14_1590	-36	Inter	sense
NC_016856.1_1401114	1401114	+	gene	1401141	1401482	+	STM14_1592	27	Inter	sense
NC_016856.1_1402911	1402911	+	gene	1402186	1403544	+	STM14_1595	0	Intra	sense
NC_016856.1_1405917	1405917	+	gene	1404920	1406275	+	STM14_1598	0	Intra	sense
NC_016856.1_1406955	1406955	+	gene	1406288	1407046	+	STM14_1599	0	Intra	sense
NC_016856.1_1409517	1409517	+	gene	1409399	1409647	-	STM14_1602	0	Intra	antisense
NC_016856.1_1412306	1412306	-	gene	1412316	1412984	-	STM14_1606	10	Inter	sense
NC_016856.1_1413040	1413040	-	gene	1412316	1412984	-	STM14_1606	-56	Inter	sense
NC_016856.1_1413103	1413103	+	gene	1413133	1413669	+	STM14_1607	30	Inter	sense
NC_016856.1_1414598	1414598	-	gene	1413712	1414572	-	STM14_1608	-26	Inter	sense
NC_016856.1_1414933	1414933	-	gene	1414679	1414969	-	STM14_1609	0	Intra	sense
NC_016856.1_1416200	1416200	+	gene	1416287	1417045	+	STM14_1611	87	Inter	sense
NC_016856.1_1416969	1416969	+	gene	1416287	1417045	+	STM14_1611	0	Intra	sense
NC_016856.1_1417504	1417504	-	gene	1417094	1418053	-	STM14_1612	0	Intra	sense
NC_016856.1_1418560	1418560	+	gene	1418507	1419361	+	STM14_1614	0	Intra	sense
NC_016856.1_1418701	1418701	-	gene	1418507	1419361	+	STM14_1614	0	Intra	antisense
NC_016856.1_1419730	1419730	+	gene	1419534	1419740	+	STM14_1615	0	Intra	sense
NC_016856.1_1421434	1421434	-	gene	1420063	1421286	-	STM14_1616	-148	Inter	sense
NC_016856.1_1421495	1421495	-	pseudogene	1421594	1421954	+	STM14_RS24755	99	Inter	antisense
NC_016856.1_1421611	1421611	-	pseudogene	1421594	1421954	+	STM14_RS24755	0	Intra	antisense
NC_016856.1_1422024	1422024	+	pseudogene	1421594	1421954	+	STM14_RS24755	-70	Inter	sense
NC_016856.1_1422184	1422184	+	gene	1422178	1424106	+	STM14_1619	0	Intra	sense
NC_016856.1_1423402	1423402	+	gene	1422178	1424106	+	STM14_1619	0	Intra	sense
NC_016856.1_1423929	1423929	+	gene	1422178	1424106	+	STM14_1619	0	Intra	sense
NC_016856.1_1423970	1423970	+	gene	1422178	1424106	+	STM14_1619	0	Intra	sense
NC_016856.1_1424318	1424318	+	gene	1424110	1424652	+	STM14_1620	0	Intra	sense
NC_016856.1_1425029	1425029	+	gene	1424996	1425352	+	STM14_1622	0	Intra	sense
NC_016856.1_1425442	1425442	+	gene	1425480	1425575	+	STM14_RS24760	38	Inter	sense
NC_016856.1_1428465	1428465	+	gene	1426653	1429040	+	STM14_1625	0	Intra	sense
NC_016856.1_1428507	1428507	+	gene	1426653	1429040	+	STM14_1625	0	Intra	sense
NC_016856.1_1428677	1428677	+	gene	1426653	1429040	+	STM14_1625	0	Intra	sense
NC_016856.1_1428828	1428828	+	gene	1426653	1429040	+	STM14_1625	0	Intra	sense
NC_016856.1_1428877	1428877	+	gene	1426653	1429040	+	STM14_1625	0	Intra	sense
NC_016856.1_1429099	1429099	+	gene	1429045	1429344	+	STM14_1626	0	Intra	sense
NC_016856.1_1429522	1429522	+	gene	1429547	1430527	+	STM14_1627	25	Inter	sense
NC_016856.1_1430684	1430684	+	gene	1430619	1431170	+	STM14_1628	0	Intra	sense
NC_016856.1_1431969	1431969	+	gene	1431996	1432460	+	STM14_1630	27	Inter	sense
NC_016856.1_1432642	1432642	+	gene	1432774	1433487	+	STM14_1632	132	Inter	sense
NC_016856.1_1433539	1433539	+	gene	1433549	1434991	+	STM14_1633	10	Inter	sense
NC_016856.1_1435208	1435208	-	gene	1435026	1435217	-	STM14_1634	0	Intra	sense
NC_016856.1_1435245	1435245	-	gene	1435026	1435217	-	STM14_1634	-28	Inter	sense
NC_016856.1_1436412	1436412	-	gene	1435374	1436420	-	STM14_1635	0	Intra	sense
NC_016856.1_1436471	1436471	-	gene	1435374	1436420	-	STM14_1635	-51	Inter	sense
NC_016856.1_1437438	1437438	-	gene	1436576	1437409	-	STM14_1637	-29	Inter	sense
NC_016856.1_1437696	1437696	+	gene	1437746	1440124	+	STM14_1639	50	Inter	sense
NC_016856.1_1439837	1439837	+	gene	1437746	1440124	+	STM14_1639	0	Intra	sense
NC_016856.1_1441398	1441398	+	gene	1440166	1441806	-	STM14_1640	0	Intra	antisense
NC_016856.1_1445500	1445500	+	gene	1445713	1446603	+	STM14_1646	213	Inter	sense
NC_016856.1_1447179	1447179	-	gene	1446679	1447830	-	STM14_1647	0	Intra	sense
NC_016856.1_1450345	1450345	-	gene	1449593	1450351	-	STM14_1649	0	Intra	sense
NC_016856.1_1450373	1450373	-	gene	1449593	1450351	-	STM14_1649	-22	Inter	sense
NC_016856.1_1450480	1450480	-	gene	1450396	1451262	-	STM14_1650	0	Intra	sense
NC_016856.1_1451523	1451523	-	gene	1451329	1452564	-	STM14_1651	0	Intra	sense
NC_016856.1_1454684	1454684	+	gene	1454280	1454639	-	STM14_1655	-45	Inter	antisense
NC_016856.1_1454854	1454854	-	gene	1454807	1454914	-	STM14_1656	0	Intra	sense
NC_016856.1_1454855	1454855	-	gene	1454807	1454914	-	STM14_1656	0	Intra	sense
NC_016856.1_1454914	1454914	-	gene	1454807	1454914	-	STM14_1656	0	Intra	sense
NC_016856.1_1454959	1454959	-	gene	1454807	1454914	-	STM14_1656	-45	Inter	sense
NC_016856.1_1454981	1454981	+	gene	1454807	1454914	-	STM14_1656	-67	Inter	antisense
NC_016856.1_1454983	1454983	+	gene	1454807	1454914	-	STM14_1656	-69	Inter	antisense
NC_016856.1_1456278	1456278	-	gene	1455097	1456215	-	STM14_1657	-63	Inter	sense
NC_016856.1_1460019	1460019	+	gene	1460003	1460230	+	STM14_1661	0	Intra	sense
NC_016856.1_1461585	1461585	-	gene	1460518	1461864	-	STM14_1662	0	Intra	sense
NC_016856.1_1461948	1461948	-	gene	1460518	1461864	-	STM14_1662	-84	Inter	sense
NC_016856.1_1462258	1462258	+	gene	1462291	1462659	+	STM14_1663	33	Inter	sense
NC_016856.1_1462677	1462677	+	gene	1462668	1464155	+	STM14_1664	0	Intra	sense
NC_016856.1_1469005	1469005	-	gene	1469033	1469272	-	STM14_1670	28	Inter	sense
NC_016856.1_1469183	1469183	-	gene	1469033	1469272	-	STM14_1670	0	Intra	sense
NC_016856.1_1469472	1469472	-	gene	1469355	1469591	-	STM14_1671	0	Intra	sense
NC_016856.1_1469505	1469505	-	gene	1469355	1469591	-	STM14_1671	0	Intra	sense
NC_016856.1_1469517	1469517	-	gene	1469355	1469591	-	STM14_1671	0	Intra	sense
NC_016856.1_1469519	1469519	-	gene	1469355	1469591	-	STM14_1671	0	Intra	sense
NC_016856.1_1469532	1469532	-	gene	1469355	1469591	-	STM14_1671	0	Intra	sense
NC_016856.1_1469551	1469551	-	gene	1469355	1469591	-	STM14_1671	0	Intra	sense
NC_016856.1_1469568	1469568	-	gene	1469355	1469591	-	STM14_1671	0	Intra	sense
NC_016856.1_1469587	1469587	-	gene	1469355	1469591	-	STM14_1671	0	Intra	sense
NC_016856.1_1469592	1469592	-	gene	1469355	1469591	-	STM14_1671	-1	Inter	sense
NC_016856.1_1469595	1469595	-	gene	1469355	1469591	-	STM14_1671	-4	Inter	sense
NC_016856.1_1469629	1469629	-	gene	1469355	1469591	-	STM14_1671	-38	Inter	sense
NC_016856.1_1471116	1471116	-	gene	1469902	1471314	-	STM14_1672	0	Intra	sense
NC_016856.1_1471279	1471279	-	gene	1469902	1471314	-	STM14_1672	0	Intra	sense
NC_016856.1_1471336	1471336	+	gene	1469902	1471314	-	STM14_1672	-22	Inter	antisense
NC_016856.1_1471543	1471543	-	gene	1471499	1471813	+	STM14_RS24765	0	Intra	antisense
NC_016856.1_1476024	1476024	-	gene	1474782	1476008	-	STM14_1676	-16	Inter	sense
NC_016856.1_1479034	1479034	+	gene	1476331	1479393	-	STM14_1677	0	Intra	antisense
NC_016856.1_1481215	1481215	+	gene	1480409	1481161	-	STM14_1679	-54	Inter	antisense
NC_016856.1_1481239	1481239	+	gene	1480409	1481161	-	STM14_1679	-78	Inter	antisense
NC_016856.1_1482297	1482297	+	gene	1481325	1483103	+	STM14_1680	0	Intra	sense
NC_016856.1_1483154	1483154	+	gene	1483078	1483698	+	STM14_1681	0	Intra	sense
NC_016856.1_1483771	1483771	+	gene	1483796	1484008	+	STM14_1682	25	Inter	sense
NC_016856.1_1486009	1486009	+	gene	1485236	1485964	-	STM14_1684	-45	Inter	antisense
NC_016856.1_1488244	1488244	+	gene	1486812	1489574	-	STM14_1687	0	Intra	antisense
NC_016856.1_1488919	1488919	+	gene	1486812	1489574	-	STM14_1687	0	Intra	antisense
NC_016856.1_1489742	1489742	-	gene	1486812	1489574	-	STM14_1687	-168	Inter	sense
NC_016856.1_1491172	1491172	-	gene	1490378	1491871	+	STM14_1689	0	Intra	antisense
NC_016856.1_1493272	1493272	-	gene	1493071	1493313	+	STM14_1691	0	Intra	antisense
NC_016856.1_1494671	1494671	-	gene	1494497	1494970	+	STM14_1695	0	Intra	antisense
NC_016856.1_1496876	1496876	+	gene	1496443	1497030	+	STM14_1697	0	Intra	sense
NC_016856.1_1499122	1499122	-	gene	1498730	1499419	+	STM14_1701	0	Intra	antisense
NC_016856.1_1501915	1501915	-	gene	1501565	1502239	+	STM14_1707	0	Intra	antisense
NC_016856.1_1502428	1502428	+	gene	1502205	1503221	+	STM14_1708	0	Intra	sense
NC_016856.1_1506935	1506935	-	gene	1505667	1506968	+	STM14_1711	0	Intra	antisense
NC_016856.1_1507785	1507785	+	gene	1507684	1508652	+	STM14_1714	0	Intra	sense
NC_016856.1_1511611	1511611	+	gene	1511623	1511699	-	STM14_RS07970	12	Inter	antisense
NC_016856.1_1511612	1511612	+	gene	1511623	1511699	-	STM14_RS07970	11	Inter	antisense
NC_016856.1_1511699	1511699	-	gene	1511623	1511699	-	STM14_RS07970	0	Intra	sense
NC_016856.1_1511747	1511747	-	gene	1511710	1511786	-	STM14_1721	0	Intra	sense
NC_016856.1_1511786	1511786	-	gene	1511710	1511786	-	STM14_1721	0	Intra	sense
NC_016856.1_1511804	1511804	-	gene	1511710	1511786	-	STM14_1721	-18	Inter	sense
NC_016856.1_1513312	1513312	+	gene	1511938	1513311	-	STM14_1722	-1	Inter	antisense
NC_016856.1_1513393	1513393	-	gene	1511938	1513311	-	STM14_1722	-82	Inter	sense
NC_016856.1_1513494	1513494	+	gene	1513528	1514169	+	STM14_1723	34	Inter	sense
NC_016856.1_1515392	1515392	-	gene	1514211	1515359	-	STM14_1724	-33	Inter	sense
NC_016856.1_1515569	1515569	-	gene	1515649	1516854	-	STM14_1725	80	Inter	sense
NC_016856.1_1516885	1516885	-	gene	1515649	1516854	-	STM14_1725	-31	Inter	sense
NC_016856.1_1516938	1516938	+	gene	1516967	1517899	+	STM14_1726	29	Inter	sense
NC_016856.1_1519178	1519178	+	pseudogene	1518921	1519131	-	STM14_RS24770	-47	Inter	antisense
NC_016856.1_1519190	1519190	+	pseudogene	1518921	1519131	-	STM14_RS24770	-59	Inter	antisense
NC_016856.1_1519221	1519221	+	pseudogene	1518921	1519131	-	STM14_RS24770	-90	Inter	antisense
NC_016856.1_1520023	1520023	-	gene	1519389	1519970	-	STM14_1729	-53	Inter	sense
NC_016856.1_1520973	1520973	-	gene	1520097	1520951	-	STM14_1730	-22	Inter	sense
NC_016856.1_1521165	1521165	+	gene	1521253	1521600	+	STM14_1731	88	Inter	sense
NC_016856.1_1521219	1521219	+	gene	1521253	1521600	+	STM14_1731	34	Inter	sense
NC_016856.1_1522351	1522351	-	gene	1521678	1522325	-	STM14_1732	-26	Inter	sense
NC_016856.1_1522860	1522860	-	gene	1522426	1522833	-	STM14_1733	-27	Inter	sense
NC_016856.1_1524657	1524657	-	gene	1524058	1524657	-	STM14_1735	0	Intra	sense
NC_016856.1_1524735	1524735	+	gene	1524760	1524999	+	STM14_1736	25	Inter	sense
NC_016856.1_1525026	1525026	+	gene	1525050	1525946	+	STM14_1737	24	Inter	sense
NC_016856.1_1526002	1526002	+	gene	1526026	1526547	+	STM14_1738	24	Inter	sense
NC_016856.1_1529691	1529691	-	gene	1529425	1529661	-	STM14_1741	-30	Inter	sense
NC_016856.1_1529817	1529817	+	gene	1529856	1530296	+	STM14_1742	39	Inter	sense
NC_016856.1_1530857	1530857	-	gene	1530344	1530811	-	STM14_1743	-46	Inter	sense
NC_016856.1_1530905	1530905	+	gene	1530344	1530811	-	STM14_1743	-94	Inter	antisense
NC_016856.1_1530929	1530929	+	gene	1530344	1530811	-	STM14_1743	-118	Inter	antisense
NC_016856.1_1530936	1530936	-	gene	1530344	1530811	-	STM14_1743	-125	Inter	sense
NC_016856.1_1532244	1532244	+	gene	1531083	1532204	+	STM14_1744	-40	Inter	sense
NC_016856.1_1532653	1532653	+	gene	1532680	1533336	+	STM14_1746	27	Inter	sense
NC_016856.1_1536055	1536055	+	gene	1535716	1536321	-	STM14_1749	0	Intra	antisense
NC_016856.1_1536346	1536346	-	gene	1535716	1536321	-	STM14_1749	-25	Inter	sense
NC_016856.1_1536362	1536362	+	gene	1535716	1536321	-	STM14_1749	-41	Inter	antisense
NC_016856.1_1538024	1538024	-	gene	1536426	1537931	-	STM14_1750	-93	Inter	sense
NC_016856.1_1544928	1544928	-	gene	1544324	1544905	-	STM14_1758	-23	Inter	sense
NC_016856.1_1544936	1544936	-	gene	1544324	1544905	-	STM14_1758	-31	Inter	sense
NC_016856.1_1545202	1545202	-	gene	1544982	1545422	-	STM14_1759	0	Intra	sense
NC_016856.1_1545204	1545204	-	gene	1544982	1545422	-	STM14_1759	0	Intra	sense
NC_016856.1_1545467	1545467	-	gene	1545511	1545726	-	STM14_1760	44	Inter	sense
NC_016856.1_1545693	1545693	-	gene	1545511	1545726	-	STM14_1760	0	Intra	sense
NC_016856.1_1545734	1545734	-	gene	1545511	1545726	-	STM14_1760	-8	Inter	sense
NC_016856.1_1545740	1545740	+	gene	1545511	1545726	-	STM14_1760	-14	Inter	antisense
NC_016856.1_1545751	1545751	+	gene	1545511	1545726	-	STM14_1760	-25	Inter	antisense
NC_016856.1_1545761	1545761	+	gene	1545511	1545726	-	STM14_1760	-35	Inter	antisense
NC_016856.1_1546185	1546185	-	gene	1546024	1546179	-	STM14_1761	-6	Inter	sense
NC_016856.1_1546335	1546335	+	gene	1546282	1547397	+	STM14_1762	0	Intra	sense
NC_016856.1_1548499	1548499	-	gene	1547472	1548473	-	STM14_1763	-26	Inter	sense
NC_016856.1_1548556	1548556	+	gene	1547472	1548473	-	STM14_1763	-83	Inter	antisense
NC_016856.1_1550745	1550745	-	gene	1550788	1551963	-	STM14_1769	43	Inter	sense
NC_016856.1_1551994	1551994	-	gene	1550788	1551963	-	STM14_1769	-31	Inter	sense
NC_016856.1_1552093	1552093	+	gene	1552163	1553809	+	STM14_1770	70	Inter	sense
NC_016856.1_1556236	1556236	+	gene	1555377	1556306	-	STM14_1773	0	Intra	antisense
NC_016856.1_1556332	1556332	-	gene	1555377	1556306	-	STM14_1773	-26	Inter	sense
NC_016856.1_1557754	1557754	-	gene	1557794	1559500	-	STM14_1775	40	Inter	sense
NC_016856.1_1557757	1557757	-	gene	1557794	1559500	-	STM14_1775	37	Inter	sense
NC_016856.1_1559348	1559348	+	gene	1557794	1559500	-	STM14_1775	0	Intra	antisense
NC_016856.1_1559720	1559720	-	gene	1559653	1560786	-	STM14_1777	0	Intra	sense
NC_016856.1_1561990	1561990	-	gene	1561266	1561997	-	STM14_1779	0	Intra	sense
NC_016856.1_1562096	1562096	+	gene	1562124	1562459	+	STM14_1780	28	Inter	sense
NC_016856.1_1565205	1565205	-	gene	1564202	1565146	-	STM14_1785	-59	Inter	sense
NC_016856.1_1565296	1565296	+	gene	1564202	1565146	-	STM14_1785	-150	Inter	antisense
NC_016856.1_1565558	1565558	+	gene	1565673	1567202	+	STM14_1787	115	Inter	sense
NC_016856.1_1565565	1565565	+	gene	1565673	1567202	+	STM14_1787	108	Inter	sense
NC_016856.1_1568914	1568914	-	gene	1568776	1569810	-	STM14_1789	0	Intra	sense
NC_016856.1_1569096	1569096	-	gene	1568776	1569810	-	STM14_1789	0	Intra	sense
NC_016856.1_1569946	1569946	+	gene	1569946	1570116	+	STM14_1790	0	Intra	sense
NC_016856.1_1570218	1570218	+	gene	1570228	1570590	+	STM14_1791	10	Inter	sense
NC_016856.1_1571811	1571811	-	gene	1570946	1571767	-	STM14_1793	-44	Inter	sense
NC_016856.1_1571829	1571829	+	gene	1570946	1571767	-	STM14_1793	-62	Inter	antisense
NC_016856.1_1572332	1572332	-	gene	1572036	1572320	-	STM14_1795	-12	Inter	sense
NC_016856.1_1573982	1573982	-	gene	1572679	1573932	-	STM14_1797	-50	Inter	sense
NC_016856.1_1575042	1575042	+	gene	1574951	1575151	+	STM14_RS24785	0	Intra	sense
NC_016856.1_1575408	1575408	+	gene	1575079	1576299	+	STM14_1799	0	Intra	sense
NC_016856.1_1578392	1578392	-	gene	1577076	1578365	-	STM14_1801	-27	Inter	sense
NC_016856.1_1578455	1578455	+	gene	1578501	1579649	-	STM14_1802	46	Inter	antisense
NC_016856.1_1579811	1579811	-	gene	1579649	1580296	-	STM14_1803	0	Intra	sense
NC_016856.1_1586853	1586853	+	gene	1584396	1586831	-	STM14_1809	-22	Inter	antisense
NC_016856.1_1589856	1589856	-	gene	1589525	1589833	-	STM14_1812	-23	Inter	sense
NC_016856.1_1589914	1589914	+	gene	1589937	1590647	+	STM14_1813	23	Inter	sense
NC_016856.1_1590173	1590173	+	gene	1589937	1590647	+	STM14_1813	0	Intra	sense
NC_016856.1_1591666	1591666	-	gene	1591284	1591625	-	STM14_1815	-41	Inter	sense
NC_016856.1_1591753	1591753	+	gene	1591778	1592104	+	STM14_1817	25	Inter	sense
NC_016856.1_1592198	1592198	+	gene	1592226	1593440	+	STM14_1818	28	Inter	sense
NC_016856.1_1598612	1598612	+	gene	1597964	1598650	-	STM14_1824	0	Intra	antisense
NC_016856.1_1598676	1598676	-	gene	1597964	1598650	-	STM14_1824	-26	Inter	sense
NC_016856.1_1599553	1599553	-	gene	1598780	1599526	-	STM14_1825	-27	Inter	sense
NC_016856.1_1599643	1599643	+	gene	1599665	1601707	+	STM14_1826	22	Inter	sense
NC_016856.1_1603337	1603337	-	gene	1603308	1603700	+	STM14_1832	0	Intra	antisense
NC_016856.1_1603846	1603846	+	gene	1603308	1603700	+	STM14_1832	-146	Inter	sense
NC_016856.1_1603870	1603870	+	gene	1603308	1603700	+	STM14_1832	-170	Inter	sense
NC_016856.1_1604190	1604190	-	gene	1604391	1605578	-	STM14_1834	201	Inter	sense
NC_016856.1_1608039	1608039	+	gene	1608167	1608832	+	STM14_1839	128	Inter	sense
NC_016856.1_1608137	1608137	+	gene	1608167	1608832	+	STM14_1839	30	Inter	sense
NC_016856.1_1611080	1611080	-	gene	1610185	1611057	-	STM14_1841	-23	Inter	sense
NC_016856.1_1614138	1614138	+	gene	1614130	1615077	+	STM14_1845	0	Intra	sense
NC_016856.1_1614912	1614912	+	gene	1614130	1615077	+	STM14_1845	0	Intra	sense
NC_016856.1_1616753	1616753	+	gene	1616392	1617510	+	STM14_1848	0	Intra	sense
NC_016856.1_1617456	1617456	+	gene	1616392	1617510	+	STM14_1848	0	Intra	sense
NC_016856.1_1621223	1621223	-	gene	1620665	1621273	-	STM14_1854	0	Intra	sense
NC_016856.1_1621929	1621929	+	gene	1621279	1622022	-	STM14_1855	0	Intra	antisense
NC_016856.1_1625955	1625955	-	gene	1625310	1626401	+	STM14_1859	0	Intra	antisense
NC_016856.1_1626194	1626194	-	gene	1625310	1626401	+	STM14_1859	0	Intra	antisense
NC_016856.1_1626533	1626533	+	gene	1626447	1627238	+	STM14_1860	0	Intra	sense
NC_016856.1_1627740	1627740	-	gene	1627297	1628322	-	STM14_1861	0	Intra	sense
NC_016856.1_1630263	1630263	+	gene	1629760	1631316	-	STM14_1863	0	Intra	antisense
NC_016856.1_1632993	1632993	+	gene	1632617	1634125	-	STM14_1865	0	Intra	antisense
NC_016856.1_1635946	1635946	-	gene	1634851	1635930	+	STM14_1868	-16	Inter	antisense
NC_016856.1_1636389	1636389	+	gene	1635982	1636371	-	STM14_1869	-18	Inter	antisense
NC_016856.1_1636434	1636434	-	gene	1635982	1636371	-	STM14_1869	-63	Inter	sense
NC_016856.1_1637083	1637083	-	gene	1636816	1637064	-	STM14_1871	-19	Inter	sense
NC_016856.1_1637312	1637312	+	gene	1637216	1637431	+	STM14_1872	0	Intra	sense
NC_016856.1_1637427	1637427	+	gene	1637216	1637431	+	STM14_1872	0	Intra	sense
NC_016856.1_1637427	1637427	+	gene	1637421	1637753	+	STM14_1873	0	Intra	sense
NC_016856.1_1637444	1637444	+	gene	1637421	1637753	+	STM14_1873	0	Intra	sense
NC_016856.1_1637930	1637930	+	gene	1637896	1638804	+	STM14_1874	0	Intra	sense
NC_016856.1_1638484	1638484	-	gene	1637896	1638804	+	STM14_1874	0	Intra	antisense
NC_016856.1_1640137	1640137	-	gene	1639903	1640112	-	STM14_1876	-25	Inter	sense
NC_016856.1_1641909	1641909	-	gene	1640382	1641848	-	STM14_1877	-61	Inter	sense
NC_016856.1_1642065	1642065	+	gene	1642107	1643114	+	STM14_1878	42	Inter	sense
NC_016856.1_1644699	1644699	-	gene	1643258	1644709	+	STM14_1879	0	Intra	antisense
NC_016856.1_1645710	1645710	+	gene	1644722	1645924	+	STM14_1880	0	Intra	sense
NC_016856.1_1648062	1648062	+	gene	1646037	1648112	-	STM14_1881	0	Intra	antisense
NC_016856.1_1650535	1650535	-	gene	1648169	1650697	-	STM14_1882	0	Intra	sense
NC_016856.1_1651726	1651726	-	gene	1650694	1652478	-	STM14_1883	0	Intra	sense
NC_016856.1_1653226	1653226	+	gene	1652607	1653392	-	STM14_1884	0	Intra	antisense
NC_016856.1_1653932	1653932	+	gene	1653535	1653864	-	STM14_1885	-68	Inter	antisense
NC_016856.1_1655393	1655393	+	gene	1655158	1655373	+	STM14_1887	-20	Inter	sense
NC_016856.1_1656021	1656021	-	gene	1655788	1657485	+	STM14_1889	0	Intra	antisense
NC_016856.1_1656878	1656878	+	gene	1655788	1657485	+	STM14_1889	0	Intra	sense
NC_016856.1_1659160	1659160	-	gene	1658872	1659528	-	STM14_1892	0	Intra	sense
NC_016856.1_1660127	1660127	-	gene	1659521	1660405	-	STM14_1893	0	Intra	sense
NC_016856.1_1662933	1662933	-	gene	1660419	1663466	-	STM14_RS08720	0	Intra	sense
NC_016856.1_1663545	1663545	-	gene	1660419	1663466	-	STM14_RS08720	-79	Inter	sense
NC_016856.1_1663604	1663604	-	gene	1660419	1663466	-	STM14_RS08720	-138	Inter	sense
NC_016856.1_1664707	1664707	+	gene	1663744	1664625	+	STM14_1896	-82	Inter	sense
NC_016856.1_1666200	1666200	+	gene	1665150	1666238	+	STM14_1898	0	Intra	sense
NC_016856.1_1668371	1668371	+	gene	1668391	1668969	+	STM14_1901	20	Inter	sense
NC_016856.1_1669192	1669192	+	gene	1669184	1670572	+	STM14_1903	0	Intra	sense
NC_016856.1_1679460	1679460	-	gene	1679481	1680113	-	STM14_1912	21	Inter	sense
NC_016856.1_1679581	1679581	+	gene	1679481	1680113	-	STM14_1912	0	Intra	antisense
NC_016856.1_1679806	1679806	-	gene	1679481	1680113	-	STM14_1912	0	Intra	sense
NC_016856.1_1679829	1679829	+	gene	1679481	1680113	-	STM14_1912	0	Intra	antisense
NC_016856.1_1681767	1681767	-	gene	1680626	1682119	+	STM14_1916	0	Intra	antisense
NC_016856.1_1683847	1683847	+	gene	1683887	1686007	+	STM14_1920	40	Inter	sense
NC_016856.1_1685182	1685182	-	gene	1683887	1686007	+	STM14_1920	0	Intra	antisense
NC_016856.1_1686182	1686182	-	gene	1686074	1686739	-	STM14_1921	0	Intra	sense
NC_016856.1_1687003	1687003	-	gene	1687073	1688110	-	STM14_1924	70	Inter	sense
NC_016856.1_1687308	1687308	+	gene	1687073	1688110	-	STM14_1924	0	Intra	antisense
NC_016856.1_1687803	1687803	-	gene	1687073	1688110	-	STM14_1924	0	Intra	sense
NC_016856.1_1688136	1688136	-	gene	1687073	1688110	-	STM14_1924	-26	Inter	sense
NC_016856.1_1688296	1688296	+	gene	1688322	1688837	+	STM14_1925	26	Inter	sense
NC_016856.1_1689559	1689559	-	gene	1689291	1689524	-	STM14_1927	-35	Inter	sense
NC_016856.1_1694029	1694029	-	gene	1691072	1694053	+	STM14_1929	0	Intra	antisense
NC_016856.1_1695029	1695029	+	gene	1694050	1696194	+	STM14_1930	0	Intra	sense
NC_016856.1_1696349	1696349	-	gene	1696239	1696502	-	STM14_1931	0	Intra	sense
NC_016856.1_1696547	1696547	+	gene	1696239	1696502	-	STM14_1931	-45	Inter	antisense
NC_016856.1_1696588	1696588	+	gene	1696611	1696706	+	STM14_1932	23	Inter	sense
NC_016856.1_1696604	1696604	+	gene	1696611	1696706	+	STM14_1932	7	Inter	sense
NC_016856.1_1696769	1696769	-	gene	1696811	1698256	-	STM14_1934	42	Inter	sense
NC_016856.1_1700231	1700231	+	gene	1699931	1700701	-	STM14_1936	0	Intra	antisense
NC_016856.1_1703358	1703358	+	gene	1703382	1703612	+	STM14_1941	24	Inter	sense
NC_016856.1_1705606	1705606	-	gene	1703613	1705577	-	STM14_1942	-29	Inter	sense
NC_016856.1_1705607	1705607	-	gene	1703613	1705577	-	STM14_1942	-30	Inter	sense
NC_016856.1_1708214	1708214	-	gene	1707515	1708183	-	STM14_1945	-31	Inter	sense
NC_016856.1_1708539	1708539	-	gene	1708339	1708935	-	STM14_1946	0	Intra	sense
NC_016856.1_1708633	1708633	-	gene	1708339	1708935	-	STM14_1946	0	Intra	sense
NC_016856.1_1710019	1710019	+	gene	1710042	1711022	+	STM14_1948	23	Inter	sense
NC_016856.1_1711586	1711586	-	gene	1711019	1711558	-	STM14_1949	-28	Inter	sense
NC_016856.1_1711741	1711741	+	gene	1711775	1712893	+	STM14_1951	34	Inter	sense
NC_016856.1_1714471	1714471	+	gene	1713182	1714495	+	STM14_1953	0	Intra	sense
NC_016856.1_1715406	1715406	-	gene	1715447	1715884	+	STM14_1955	41	Inter	antisense
NC_016856.1_1716754	1716754	+	gene	1716544	1717335	+	STM14_1957	0	Intra	sense
NC_016856.1_1721535	1721535	-	gene	1719804	1721459	-	STM14_1962	-76	Inter	sense
NC_016856.1_1723217	1723217	-	gene	1723236	1724579	-	STM14_1964	19	Inter	sense
NC_016856.1_1724478	1724478	-	gene	1723236	1724579	-	STM14_1964	0	Intra	sense
NC_016856.1_1724603	1724603	-	gene	1723236	1724579	-	STM14_1964	-24	Inter	sense
NC_016856.1_1724805	1724805	+	gene	1724872	1725795	+	STM14_1965	67	Inter	sense
NC_016856.1_1724872	1724872	+	gene	1724872	1725795	+	STM14_1965	0	Intra	sense
NC_016856.1_1727525	1727525	-	gene	1727480	1727695	+	STM14_1967	0	Intra	antisense
NC_016856.1_1727866	1727866	+	gene	1727650	1728768	-	STM14_1968	0	Intra	antisense
NC_016856.1_1728012	1728012	-	gene	1727650	1728768	-	STM14_1968	0	Intra	sense
NC_016856.1_1729405	1729405	+	gene	1729598	1729999	+	STM14_1970	193	Inter	sense
NC_016856.1_1729697	1729697	-	gene	1729598	1729999	+	STM14_1970	0	Intra	antisense
NC_016856.1_1737114	1737114	+	gene	1736853	1738403	+	STM14_1981	0	Intra	sense
NC_016856.1_1738116	1738116	+	gene	1736853	1738403	+	STM14_1981	0	Intra	sense
NC_016856.1_1738843	1738843	+	gene	1739011	1739529	+	STM14_1982	168	Inter	sense
NC_016856.1_1739651	1739651	+	gene	1739011	1739529	+	STM14_1982	-122	Inter	sense
NC_016856.1_1740356	1740356	-	gene	1739800	1740330	-	STM14_1983	-26	Inter	sense
NC_016856.1_1741622	1741622	-	gene	1741311	1745213	-	STM14_1985	0	Intra	sense
NC_016856.1_1742840	1742840	-	gene	1741311	1745213	-	STM14_1985	0	Intra	sense
NC_016856.1_1744928	1744928	-	gene	1741311	1745213	-	STM14_1985	0	Intra	sense
NC_016856.1_1745260	1745260	-	gene	1741311	1745213	-	STM14_1985	-47	Inter	sense
NC_016856.1_1745445	1745445	-	gene	1745414	1746019	+	STM14_1986	0	Intra	antisense
NC_016856.1_1745475	1745475	-	gene	1745414	1746019	+	STM14_1986	0	Intra	antisense
NC_016856.1_1746923	1746923	-	gene	1746608	1746931	-	STM14_1988	0	Intra	sense
NC_016856.1_1747158	1747158	-	gene	1747130	1749766	-	STM14_1990	0	Intra	sense
NC_016856.1_1749722	1749722	-	gene	1747130	1749766	-	STM14_1990	0	Intra	sense
NC_016856.1_1749809	1749809	-	gene	1747130	1749766	-	STM14_1990	-43	Inter	sense
NC_016856.1_1751059	1751059	-	gene	1751106	1751516	+	STM14_1992	47	Inter	antisense
NC_016856.1_1751078	1751078	+	gene	1751106	1751516	+	STM14_1992	28	Inter	sense
NC_016856.1_1751134	1751134	-	gene	1751106	1751516	+	STM14_1992	0	Intra	antisense
NC_016856.1_1751153	1751153	+	gene	1751106	1751516	+	STM14_1992	0	Intra	sense
NC_016856.1_1751861	1751861	-	gene	1751742	1752041	+	STM14_1994	0	Intra	antisense
NC_016856.1_1755179	1755179	-	gene	1752102	1755626	+	STM14_1995	0	Intra	antisense
NC_016856.1_1755763	1755763	-	gene	1755685	1755894	-	STM14_1996	0	Intra	sense
NC_016856.1_1756086	1756086	+	gene	1756108	1756542	+	STM14_1997	22	Inter	sense
NC_016856.1_1756851	1756851	-	gene	1756592	1756930	-	STM14_1998	0	Intra	sense
NC_016856.1_1756962	1756962	-	gene	1756923	1757075	-	STM14_RS09145	0	Intra	sense
NC_016856.1_1756981	1756981	+	gene	1756923	1757075	-	STM14_RS09145	0	Intra	antisense
NC_016856.1_1757074	1757074	+	gene	1756923	1757075	-	STM14_RS09145	0	Intra	antisense
NC_016856.1_1757074	1757074	+	gene	1757043	1757234	+	STM14_1999	0	Intra	sense
NC_016856.1_1757691	1757691	+	gene	1757286	1758221	+	STM14_2000	0	Intra	sense
NC_016856.1_1759875	1759875	-	gene	1759667	1759849	-	STM14_RS24825	-26	Inter	sense
NC_016856.1_1760029	1760029	-	gene	1760125	1761108	-	STM14_2002	96	Inter	sense
NC_016856.1_1760229	1760229	-	gene	1760125	1761108	-	STM14_2002	0	Intra	sense
NC_016856.1_1761133	1761133	-	gene	1760125	1761108	-	STM14_2002	-25	Inter	sense
NC_016856.1_1761974	1761974	+	gene	1761254	1762408	-	STM14_2003	0	Intra	antisense
NC_016856.1_1762387	1762387	-	gene	1761254	1762408	-	STM14_2003	0	Intra	sense
NC_016856.1_1762654	1762654	+	gene	1762659	1762838	-	STM14_RS24830	5	Inter	antisense
NC_016856.1_1763409	1763409	-	gene	1762819	1763382	-	STM14_2005	-27	Inter	sense
NC_016856.1_1763485	1763485	+	gene	1762819	1763382	-	STM14_2005	-103	Inter	antisense
NC_016856.1_1763569	1763569	+	gene	1763640	1764155	+	STM14_2006	71	Inter	sense
NC_016856.1_1763610	1763610	+	gene	1763640	1764155	+	STM14_2006	30	Inter	sense
NC_016856.1_1763626	1763626	+	gene	1763640	1764155	+	STM14_2006	14	Inter	sense
NC_016856.1_1764325	1764325	+	gene	1764309	1765103	+	STM14_2007	0	Intra	sense
NC_016856.1_1765220	1765220	+	gene	1765254	1766201	+	STM14_2008	34	Inter	sense
NC_016856.1_1766526	1766526	+	gene	1766256	1766510	-	STM14_2009	-16	Inter	antisense
NC_016856.1_1766542	1766542	-	gene	1766256	1766510	-	STM14_2009	-32	Inter	sense
NC_016856.1_1766701	1766701	+	gene	1766749	1767780	+	STM14_2010	48	Inter	sense
NC_016856.1_1767571	1767571	-	gene	1766749	1767780	+	STM14_2010	0	Intra	antisense
NC_016856.1_1775701	1775701	-	gene	1775622	1776731	+	STM14_2019	0	Intra	antisense
NC_016856.1_1776796	1776796	-	gene	1775622	1776731	+	STM14_2019	-65	Inter	antisense
NC_016856.1_1779442	1779442	+	gene	1778782	1779651	-	STM14_2023	0	Intra	antisense
NC_016856.1_1783617	1783617	-	gene	1781975	1783588	-	STM14_2027	-29	Inter	sense
NC_016856.1_1783744	1783744	+	gene	1783778	1784506	+	STM14_2028	34	Inter	sense
NC_016856.1_1784750	1784750	-	gene	1784481	1785446	-	STM14_2029	0	Intra	sense
NC_016856.1_1785530	1785530	+	gene	1785562	1786068	+	STM14_2030	32	Inter	sense
NC_016856.1_1785546	1785546	+	gene	1785562	1786068	+	STM14_2030	16	Inter	sense
NC_016856.1_1786948	1786948	-	gene	1786870	1788411	-	STM14_2033	0	Intra	sense
NC_016856.1_1788440	1788440	-	gene	1786870	1788411	-	STM14_2033	-29	Inter	sense
NC_016856.1_1789405	1789405	-	gene	1788559	1789620	-	STM14_2034	0	Intra	sense
NC_016856.1_1791505	1791505	-	gene	1791163	1791477	-	STM14_2036	-28	Inter	sense
NC_016856.1_1793247	1793247	+	gene	1793276	1794256	+	STM14_2041	29	Inter	sense
NC_016856.1_1794343	1794343	+	gene	1794368	1796017	+	STM14_2042	25	Inter	sense
NC_016856.1_1794376	1794376	+	gene	1794368	1796017	+	STM14_2042	0	Intra	sense
NC_016856.1_1800145	1800145	-	gene	1799672	1800379	-	STM14_2047	0	Intra	sense
NC_016856.1_1800155	1800155	-	gene	1799672	1800379	-	STM14_2047	0	Intra	sense
NC_016856.1_1800403	1800403	-	gene	1799672	1800379	-	STM14_2047	-24	Inter	sense
NC_016856.1_1801045	1801045	-	gene	1800846	1802219	-	STM14_2050	0	Intra	sense
NC_016856.1_1802578	1802578	+	gene	1802408	1802707	+	STM14_2052	0	Intra	sense
NC_016856.1_1802743	1802743	+	gene	1802408	1802707	+	STM14_2052	-36	Inter	sense
NC_016856.1_1804481	1804481	+	gene	1803813	1804946	+	STM14_2055	0	Intra	sense
NC_016856.1_1804894	1804894	+	gene	1803813	1804946	+	STM14_2055	0	Intra	sense
NC_016856.1_1807043	1807043	-	gene	1806995	1807216	+	STM14_RS24845	0	Intra	antisense
NC_016856.1_1807095	1807095	+	gene	1806995	1807216	+	STM14_RS24845	0	Intra	sense
NC_016856.1_1807136	1807136	+	gene	1806995	1807216	+	STM14_RS24845	0	Intra	sense
NC_016856.1_1807481	1807481	+	gene	1807231	1809213	+	STM14_2058	0	Intra	sense
NC_016856.1_1809304	1809304	+	gene	1809335	1809514	+	STM14_2059	31	Inter	sense
NC_016856.1_1809305	1809305	+	gene	1809335	1809514	+	STM14_2059	30	Inter	sense
NC_016856.1_1809464	1809464	+	gene	1809335	1809514	+	STM14_2059	0	Intra	sense
NC_016856.1_1810469	1810469	+	gene	1809601	1810353	+	STM14_2060	-116	Inter	sense
NC_016856.1_1813460	1813460	-	gene	1813380	1813688	-	STM14_2067	0	Intra	sense
NC_016856.1_1813744	1813744	-	gene	1813672	1813893	+	STM14_RS24850	0	Intra	antisense
NC_016856.1_1814226	1814226	-	gene	1813838	1814602	-	STM14_2068	0	Intra	sense
NC_016856.1_1814744	1814744	+	gene	1814798	1815388	+	STM14_2069	54	Inter	sense
NC_016856.1_1818338	1818338	-	pseudogene	1818091	1818276	-	STM14_RS24855	-62	Inter	sense
NC_016856.1_1818377	1818377	-	pseudogene	1818091	1818276	-	STM14_RS24855	-101	Inter	sense
NC_016856.1_1818873	1818873	-	gene	1818675	1818803	-	STM14_RS09465	-70	Inter	sense
NC_016856.1_1818885	1818885	-	gene	1818675	1818803	-	STM14_RS09465	-82	Inter	sense
NC_016856.1_1823255	1823255	-	gene	1820481	1823078	-	STM14_2075	-177	Inter	sense
NC_016856.1_1823317	1823317	-	gene	1823481	1823732	+	STM14_2077	164	Inter	antisense
NC_016856.1_1823319	1823319	-	gene	1823481	1823732	+	STM14_2077	162	Inter	antisense
NC_016856.1_1823346	1823346	-	gene	1823481	1823732	+	STM14_2077	135	Inter	antisense
NC_016856.1_1823433	1823433	+	gene	1823481	1823732	+	STM14_2077	48	Inter	sense
NC_016856.1_1823463	1823463	+	gene	1823481	1823732	+	STM14_2077	18	Inter	sense
NC_016856.1_1823465	1823465	+	gene	1823481	1823732	+	STM14_2077	16	Inter	sense
NC_016856.1_1824829	1824829	-	gene	1823774	1824820	-	STM14_2078	-9	Inter	sense
NC_016856.1_1824850	1824850	-	gene	1823774	1824820	-	STM14_2078	-30	Inter	sense
NC_016856.1_1824998	1824998	+	gene	1825058	1825819	+	STM14_2080	60	Inter	sense
NC_016856.1_1828841	1828841	+	gene	1828097	1828978	-	STM14_2084	0	Intra	antisense
NC_016856.1_1828995	1828995	-	gene	1828097	1828978	-	STM14_2084	-17	Inter	sense
NC_016856.1_1832657	1832657	-	gene	1832400	1833758	+	STM14_2088	0	Intra	antisense
NC_016856.1_1836191	1836191	+	gene	1836247	1836429	+	STM14_2091	56	Inter	sense
NC_016856.1_1837661	1837661	+	gene	1837622	1838500	+	STM14_2094	0	Intra	sense
NC_016856.1_1838725	1838725	-	gene	1838582	1839220	-	STM14_2095	0	Intra	sense
NC_016856.1_1838803	1838803	-	gene	1838582	1839220	-	STM14_2095	0	Intra	sense
NC_016856.1_1838828	1838828	+	gene	1838582	1839220	-	STM14_2095	0	Intra	antisense
NC_016856.1_1839249	1839249	-	gene	1838582	1839220	-	STM14_2095	-29	Inter	sense
NC_016856.1_1839956	1839956	+	gene	1839558	1839962	+	STM14_2096	0	Intra	sense
NC_016856.1_1840429	1840429	+	gene	1839988	1840731	+	STM14_2097	0	Intra	sense
NC_016856.1_1840456	1840456	+	gene	1839988	1840731	+	STM14_2097	0	Intra	sense
NC_016856.1_1840635	1840635	+	gene	1839988	1840731	+	STM14_2097	0	Intra	sense
NC_016856.1_1841108	1841108	+	gene	1840788	1841327	+	STM14_2098	0	Intra	sense
NC_016856.1_1841435	1841435	-	gene	1841488	1841889	+	STM14_2099	53	Inter	antisense
NC_016856.1_1841460	1841460	+	gene	1841488	1841889	+	STM14_2099	28	Inter	sense
NC_016856.1_1842873	1842873	+	gene	1842901	1843197	+	STM14_2101	28	Inter	sense
NC_016856.1_1843308	1843308	-	gene	1842901	1843197	+	STM14_2101	-111	Inter	antisense
NC_016856.1_1843438	1843438	-	gene	1843557	1845017	+	STM14_2103	119	Inter	antisense
NC_016856.1_1845027	1845027	+	gene	1843557	1845017	+	STM14_2103	-10	Inter	sense
NC_016856.1_1845165	1845165	+	gene	1845051	1845380	+	STM14_2104	0	Intra	sense
NC_016856.1_1847305	1847305	-	gene	1846312	1847316	-	STM14_2106	0	Intra	sense
NC_016856.1_1852087	1852087	-	gene	1851996	1852310	+	STM14_2111	0	Intra	antisense
NC_016856.1_1852188	1852188	-	gene	1851996	1852310	+	STM14_2111	0	Intra	antisense
NC_016856.1_1852440	1852440	-	gene	1851996	1852310	+	STM14_2111	-130	Inter	antisense
NC_016856.1_1853394	1853394	-	gene	1852693	1853340	-	STM14_2112	-54	Inter	sense
NC_016856.1_1853628	1853628	+	gene	1853817	1856495	+	STM14_2113	189	Inter	sense
NC_016856.1_1857629	1857629	-	gene	1856692	1857309	-	STM14_2114	-320	Inter	sense
NC_016856.1_1857863	1857863	+	gene	1857972	1858385	+	STM14_2116	109	Inter	sense
NC_016856.1_1857936	1857936	+	gene	1857972	1858385	+	STM14_2116	36	Inter	sense
NC_016856.1_1858083	1858083	+	gene	1857972	1858385	+	STM14_2116	0	Intra	sense
NC_016856.1_1858163	1858163	+	gene	1857972	1858385	+	STM14_2116	0	Intra	sense
NC_016856.1_1859000	1859000	-	gene	1858517	1859425	-	STM14_2118	0	Intra	sense
NC_016856.1_1859477	1859477	-	gene	1858517	1859425	-	STM14_2118	-52	Inter	sense
NC_016856.1_1859562	1859562	-	gene	1859628	1860641	-	STM14_2119	66	Inter	sense
NC_016856.1_1860663	1860663	-	gene	1859628	1860641	-	STM14_2119	-22	Inter	sense
NC_016856.1_1860715	1860715	-	gene	1860732	1861637	-	STM14_2120	17	Inter	sense
NC_016856.1_1860721	1860721	-	gene	1860732	1861637	-	STM14_2120	11	Inter	sense
NC_016856.1_1862335	1862335	-	gene	1862257	1863099	+	STM14_2122	0	Intra	antisense
NC_016856.1_1862353	1862353	+	gene	1862257	1863099	+	STM14_2122	0	Intra	sense
NC_016856.1_1862363	1862363	+	gene	1862257	1863099	+	STM14_2122	0	Intra	sense
NC_016856.1_1863258	1863258	+	gene	1863258	1863342	+	STM14_2124	0	Intra	sense
NC_016856.1_1863424	1863424	+	gene	1863387	1863512	+	STM14_2125	0	Intra	sense
NC_016856.1_1863547	1863547	+	gene	1863547	1863631	+	STM14_2126	0	Intra	sense
NC_016856.1_1865118	1865118	+	gene	1864415	1865944	-	STM14_2127	0	Intra	antisense
NC_016856.1_1865287	1865287	-	gene	1864415	1865944	-	STM14_2127	0	Intra	sense
NC_016856.1_1865894	1865894	-	gene	1864415	1865944	-	STM14_2127	0	Intra	sense
NC_016856.1_1874979	1874979	+	gene	1874971	1876767	+	STM14_2136	0	Intra	sense
NC_016856.1_1876159	1876159	+	gene	1874971	1876767	+	STM14_2136	0	Intra	sense
NC_016856.1_1878282	1878282	-	gene	1877411	1878835	-	STM14_2138	0	Intra	sense
NC_016856.1_1878683	1878683	+	gene	1877411	1878835	-	STM14_2138	0	Intra	antisense
NC_016856.1_1878836	1878836	-	gene	1877411	1878835	-	STM14_2138	-1	Inter	sense
NC_016856.1_1878976	1878976	+	gene	1879012	1879365	+	STM14_2139	36	Inter	sense
NC_016856.1_1879199	1879199	+	gene	1879012	1879365	+	STM14_2139	0	Intra	sense
NC_016856.1_1879699	1879699	-	gene	1879445	1879675	-	STM14_2140	-24	Inter	sense
NC_016856.1_1881974	1881974	+	gene	1881988	1882797	-	STM14_2143	14	Inter	antisense
NC_016856.1_1881986	1881986	+	gene	1881988	1882797	-	STM14_2143	2	Inter	antisense
NC_016856.1_1882935	1882935	-	gene	1882801	1883190	-	STM14_2144	0	Intra	sense
NC_016856.1_1884162	1884162	-	gene	1884020	1885102	-	STM14_2146	0	Intra	sense
NC_016856.1_1886437	1886437	-	gene	1885143	1886399	-	STM14_2147	-38	Inter	sense
NC_016856.1_1886528	1886528	-	gene	1885143	1886399	-	STM14_2147	-129	Inter	sense
NC_016856.1_1886576	1886576	+	gene	1886713	1887336	+	STM14_2149	137	Inter	sense
NC_016856.1_1887384	1887384	+	gene	1887333	1888184	+	STM14_2150	0	Intra	sense
NC_016856.1_1888034	1888034	+	gene	1887333	1888184	+	STM14_2150	0	Intra	sense
NC_016856.1_1891555	1891555	-	gene	1891252	1891530	-	STM14_2155	-25	Inter	sense
NC_016856.1_1891583	1891583	-	gene	1891252	1891530	-	STM14_2155	-53	Inter	sense
NC_016856.1_1891695	1891695	+	gene	1891782	1892390	+	STM14_2156	87	Inter	sense
NC_016856.1_1891696	1891696	+	gene	1891782	1892390	+	STM14_2156	86	Inter	sense
NC_016856.1_1891778	1891778	+	gene	1891782	1892390	+	STM14_2156	4	Inter	sense
NC_016856.1_1892437	1892437	+	gene	1891782	1892390	+	STM14_2156	-47	Inter	sense
NC_016856.1_1895072	1895072	-	gene	1893757	1895022	-	STM14_2159	-50	Inter	sense
NC_016856.1_1895829	1895829	-	gene	1895517	1896635	+	STM14_2161	0	Intra	antisense
NC_016856.1_1903825	1903825	+	gene	1903787	1903876	+	STM14_2169	0	Intra	sense
NC_016856.1_1904236	1904236	-	gene	1904271	1905545	+	STM14_2170	35	Inter	antisense
NC_016856.1_1905685	1905685	-	gene	1905759	1907471	+	STM14_2172	74	Inter	antisense
NC_016856.1_1905713	1905713	+	gene	1905759	1907471	+	STM14_2172	46	Inter	sense
NC_016856.1_1907814	1907814	-	gene	1907534	1907788	-	STM14_2173	-26	Inter	sense
NC_016856.1_1908551	1908551	+	gene	1907957	1908691	+	STM14_2174	0	Intra	sense
NC_016856.1_1909319	1909319	-	gene	1908705	1909316	-	STM14_2175	-3	Inter	sense
NC_016856.1_1909439	1909439	-	gene	1909487	1910401	+	STM14_2176	48	Inter	antisense
NC_016856.1_1910456	1910456	+	gene	1910498	1912231	+	STM14_2177	42	Inter	sense
NC_016856.1_1910464	1910464	+	gene	1910498	1912231	+	STM14_2177	34	Inter	sense
NC_016856.1_1910471	1910471	+	gene	1910498	1912231	+	STM14_2177	27	Inter	sense
NC_016856.1_1914713	1914713	-	gene	1913378	1914676	-	STM14_2179	-37	Inter	sense
NC_016856.1_1914954	1914954	+	gene	1914999	1916531	+	STM14_2181	45	Inter	sense
NC_016856.1_1917240	1917240	-	gene	1916578	1917297	-	STM14_2182	0	Intra	sense
NC_016856.1_1917330	1917330	-	gene	1916578	1917297	-	STM14_2182	-33	Inter	sense
NC_016856.1_1917803	1917803	+	gene	1917517	1919061	+	STM14_2183	0	Intra	sense
NC_016856.1_1920534	1920534	+	gene	1920620	1920757	-	STM14_2188	86	Inter	antisense
NC_016856.1_1920783	1920783	-	gene	1920620	1920757	-	STM14_2188	-26	Inter	sense
NC_016856.1_1922692	1922692	-	gene	1922357	1922689	-	STM14_2192	-3	Inter	sense
NC_016856.1_1922716	1922716	+	gene	1922357	1922689	-	STM14_2192	-27	Inter	antisense
NC_016856.1_1922870	1922870	-	gene	1922776	1923483	+	STM14_2193	0	Intra	antisense
NC_016856.1_1923222	1923222	+	gene	1922776	1923483	+	STM14_2193	0	Intra	sense
NC_016856.1_1923992	1923992	+	gene	1923507	1924319	+	STM14_2194	0	Intra	sense
NC_016856.1_1928273	1928273	-	gene	1926624	1928309	-	STM14_2199	0	Intra	sense
NC_016856.1_1928370	1928370	-	gene	1928329	1928535	+	STM14_2200	0	Intra	antisense
NC_016856.1_1928389	1928389	-	gene	1928329	1928535	+	STM14_2200	0	Intra	antisense
NC_016856.1_1929133	1929133	-	gene	1929167	1929862	-	STM14_2202	34	Inter	sense
NC_016856.1_1929155	1929155	-	gene	1929167	1929862	-	STM14_2202	12	Inter	sense
NC_016856.1_1929889	1929889	-	gene	1929167	1929862	-	STM14_2202	-27	Inter	sense
NC_016856.1_1930632	1930632	+	gene	1929920	1931830	-	STM14_2203	0	Intra	antisense
NC_016856.1_1930878	1930878	-	gene	1929920	1931830	-	STM14_2203	0	Intra	sense
NC_016856.1_1931850	1931850	-	gene	1929920	1931830	-	STM14_2203	-20	Inter	sense
NC_016856.1_1931930	1931930	+	gene	1931961	1932305	+	STM14_2204	31	Inter	sense
NC_016856.1_1932512	1932512	-	gene	1932311	1932490	-	STM14_2205	-22	Inter	sense
NC_016856.1_1932516	1932516	+	gene	1932311	1932490	-	STM14_2205	-26	Inter	antisense
NC_016856.1_1932727	1932727	+	gene	1932571	1933935	+	STM14_2206	0	Intra	sense
NC_016856.1_1933912	1933912	+	gene	1932571	1933935	+	STM14_2206	0	Intra	sense
NC_016856.1_1934730	1934730	+	gene	1934781	1936145	+	STM14_2208	51	Inter	sense
NC_016856.1_1935269	1935269	-	gene	1934781	1936145	+	STM14_2208	0	Intra	antisense
NC_016856.1_1936765	1936765	+	gene	1936283	1937884	+	STM14_2209	0	Intra	sense
NC_016856.1_1939540	1939540	-	gene	1939453	1939788	-	STM14_RS10040	0	Intra	sense
NC_016856.1_1939824	1939824	+	gene	1939453	1939788	-	STM14_RS10040	-36	Inter	antisense
NC_016856.1_1941118	1941118	+	gene	1940959	1941759	+	STM14_2213	0	Intra	sense
NC_016856.1_1947343	1947343	-	gene	1947174	1947317	-	STM14_2221	-26	Inter	sense
NC_016856.1_1947344	1947344	-	gene	1947174	1947317	-	STM14_2221	-27	Inter	sense
NC_016856.1_1947362	1947362	-	gene	1947174	1947317	-	STM14_2221	-45	Inter	sense
NC_016856.1_1947520	1947520	-	gene	1947174	1947317	-	STM14_2221	-203	Inter	sense
NC_016856.1_1947710	1947710	-	gene	1947966	1948253	-	STM14_2225	256	Inter	sense
NC_016856.1_1948272	1948272	-	gene	1947966	1948253	-	STM14_2225	-19	Inter	sense
NC_016856.1_1948472	1948472	-	gene	1948324	1948467	-	STM14_2226	-5	Inter	sense
NC_016856.1_1948492	1948492	-	gene	1948324	1948467	-	STM14_2226	-25	Inter	sense
NC_016856.1_1948523	1948523	-	gene	1948324	1948467	-	STM14_2226	-56	Inter	sense
NC_016856.1_1948577	1948577	-	gene	1948625	1948864	+	STM14_2227	48	Inter	antisense
NC_016856.1_1948589	1948589	-	gene	1948625	1948864	+	STM14_2227	36	Inter	antisense
NC_016856.1_1948601	1948601	+	gene	1948625	1948864	+	STM14_2227	24	Inter	sense
NC_016856.1_1949429	1949429	-	gene	1949076	1949867	-	STM14_2228	0	Intra	sense
NC_016856.1_1949907	1949907	-	gene	1949076	1949867	-	STM14_2228	-40	Inter	sense
NC_016856.1_1949986	1949986	-	gene	1950043	1951416	+	STM14_2230	57	Inter	antisense
NC_016856.1_1950818	1950818	-	gene	1950043	1951416	+	STM14_2230	0	Intra	antisense
NC_016856.1_1952388	1952388	-	gene	1951464	1952345	-	STM14_2231	-43	Inter	sense
NC_016856.1_1952408	1952408	-	gene	1951464	1952345	-	STM14_2231	-63	Inter	sense
NC_016856.1_1952922	1952922	-	gene	1952539	1954587	-	STM14_2232	0	Intra	sense
NC_016856.1_1955342	1955342	-	gene	1954607	1955293	-	STM14_2233	-49	Inter	sense
NC_016856.1_1955342	1955342	-	gene	1955391	1955975	-	STM14_2234	49	Inter	sense
NC_016856.1_1955975	1955975	-	gene	1955391	1955975	-	STM14_2234	0	Intra	sense
NC_016856.1_1955985	1955985	-	gene	1955391	1955975	-	STM14_2234	-10	Inter	sense
NC_016856.1_1955992	1955992	+	gene	1955391	1955975	-	STM14_2234	-17	Inter	antisense
NC_016856.1_1956640	1956640	+	gene	1956017	1957300	+	STM14_2235	0	Intra	sense
NC_016856.1_1957147	1957147	+	gene	1956017	1957300	+	STM14_2235	0	Intra	sense
NC_016856.1_1957680	1957680	+	gene	1957263	1959902	+	STM14_2236	0	Intra	sense
NC_016856.1_1961860	1961860	+	gene	1961884	1962075	+	STM14_2240	24	Inter	sense
NC_016856.1_1961872	1961872	+	gene	1961884	1962075	+	STM14_2240	12	Inter	sense
NC_016856.1_1962776	1962776	-	gene	1962094	1962744	-	STM14_2241	-32	Inter	sense
NC_016856.1_1962977	1962977	-	gene	1962968	1963132	-	STM14_2242	0	Intra	sense
NC_016856.1_1963003	1963003	-	gene	1962968	1963132	-	STM14_2242	0	Intra	sense
NC_016856.1_1963186	1963186	-	gene	1962968	1963132	-	STM14_2242	-54	Inter	sense
NC_016856.1_1963807	1963807	+	gene	1963417	1964139	-	STM14_2244	0	Intra	antisense
NC_016856.1_1964158	1964158	-	gene	1963417	1964139	-	STM14_2244	-19	Inter	sense
NC_016856.1_1964161	1964161	-	gene	1963417	1964139	-	STM14_2244	-22	Inter	sense
NC_016856.1_1965491	1965491	+	gene	1965548	1966024	+	STM14_2248	57	Inter	sense
NC_016856.1_1965502	1965502	-	gene	1965548	1966024	+	STM14_2248	46	Inter	antisense
NC_016856.1_1965873	1965873	-	gene	1965548	1966024	+	STM14_2248	0	Intra	antisense
NC_016856.1_1966142	1966142	-	gene	1965548	1966024	+	STM14_2248	-118	Inter	antisense
NC_016856.1_1966627	1966627	-	gene	1966412	1966831	-	STM14_2249	0	Intra	sense
NC_016856.1_1966750	1966750	+	gene	1966412	1966831	-	STM14_2249	0	Intra	antisense
NC_016856.1_1966855	1966855	-	gene	1966412	1966831	-	STM14_2249	-24	Inter	sense
NC_016856.1_1966862	1966862	-	gene	1966412	1966831	-	STM14_2249	-31	Inter	sense
NC_016856.1_1967357	1967357	+	gene	1967201	1967470	+	STM14_2251	0	Intra	sense
NC_016856.1_1967500	1967500	+	gene	1967201	1967470	+	STM14_2251	-30	Inter	sense
NC_016856.1_1967585	1967585	-	gene	1967636	1967776	+	STM14_2252	51	Inter	antisense
NC_016856.1_1967592	1967592	-	gene	1967636	1967776	+	STM14_2252	44	Inter	antisense
NC_016856.1_1969191	1969191	-	gene	1969240	1969608	+	STM14_2254	49	Inter	antisense
NC_016856.1_1969208	1969208	+	gene	1969240	1969608	+	STM14_2254	32	Inter	sense
NC_016856.1_1969595	1969595	+	gene	1969240	1969608	+	STM14_2254	0	Intra	sense
NC_016856.1_1969595	1969595	+	gene	1969546	1969803	-	STM14_RS24890	0	Intra	antisense
NC_016856.1_1969630	1969630	+	gene	1969546	1969803	-	STM14_RS24890	0	Intra	antisense
NC_016856.1_1973331	1973331	+	gene	1973068	1973193	-	STM14_2259	-138	Inter	antisense
NC_016856.1_1973427	1973427	+	gene	1973494	1973760	-	STM14_2262	67	Inter	antisense
NC_016856.1_1974530	1974530	+	gene	1974584	1974784	+	STM14_2265	54	Inter	sense
NC_016856.1_1979314	1979314	+	gene	1978431	1979327	+	STM14_2275	0	Intra	sense
NC_016856.1_1979380	1979380	+	gene	1978431	1979327	+	STM14_2275	-53	Inter	sense
NC_016856.1_1979381	1979381	+	gene	1978431	1979327	+	STM14_2275	-54	Inter	sense
NC_016856.1_1980194	1980194	-	gene	1980071	1980946	-	STM14_2279	0	Intra	sense
NC_016856.1_1980424	1980424	-	gene	1980071	1980946	-	STM14_2279	0	Intra	sense
NC_016856.1_1981341	1981341	-	gene	1980947	1981321	-	STM14_2280	-20	Inter	sense
NC_016856.1_1981349	1981349	-	gene	1980947	1981321	-	STM14_2280	-28	Inter	sense
NC_016856.1_1981393	1981393	-	gene	1981459	1981689	+	STM14_2281	66	Inter	antisense
NC_016856.1_1981741	1981741	+	gene	1981459	1981689	+	STM14_2281	-52	Inter	sense
NC_016856.1_1981764	1981764	+	gene	1981797	1982453	+	STM14_2282	33	Inter	sense
NC_016856.1_1981773	1981773	+	gene	1981797	1982453	+	STM14_2282	24	Inter	sense
NC_016856.1_1982458	1982458	+	gene	1981797	1982453	+	STM14_2282	-5	Inter	sense
NC_016856.1_1986160	1986160	-	gene	1985474	1986133	-	STM14_2285	-27	Inter	sense
NC_016856.1_1986605	1986605	-	gene	1986227	1986580	-	STM14_2286	-25	Inter	sense
NC_016856.1_1987047	1987047	+	gene	1987069	1988247	+	STM14_2288	22	Inter	sense
NC_016856.1_1993396	1993396	-	gene	1992889	1993758	+	STM14_2295	0	Intra	antisense
NC_016856.1_1993641	1993641	+	gene	1992889	1993758	+	STM14_2295	0	Intra	sense
NC_016856.1_1993853	1993853	-	gene	1993882	1995324	+	STM14_2296	29	Inter	antisense
NC_016856.1_1993867	1993867	-	gene	1993882	1995324	+	STM14_2296	15	Inter	antisense
NC_016856.1_1995606	1995606	-	gene	1995397	1996368	-	STM14_2297	0	Intra	sense
NC_016856.1_1997457	1997457	+	gene	1996485	1997804	-	STM14_2299	0	Intra	antisense
NC_016856.1_1998195	1998195	-	gene	1997820	1998779	-	STM14_2300	0	Intra	sense
NC_016856.1_1998250	1998250	-	gene	1997820	1998779	-	STM14_2300	0	Intra	sense
NC_016856.1_1998771	1998771	+	gene	1997820	1998779	-	STM14_2300	0	Intra	antisense
NC_016856.1_2001564	2001564	-	gene	2001478	2002089	-	STM14_2304	0	Intra	sense
NC_016856.1_2002326	2002326	-	pseudogene	2002509	2003404	+	STM14_2307	183	Inter	antisense
NC_016856.1_2002663	2002663	+	pseudogene	2002509	2003404	+	STM14_2307	0	Intra	sense
NC_016856.1_2005402	2005402	-	gene	2005190	2005930	-	STM14_2310	0	Intra	sense
NC_016856.1_2005840	2005840	-	gene	2005190	2005930	-	STM14_2310	0	Intra	sense
NC_016856.1_2008400	2008400	+	gene	2006515	2008287	-	STM14_2312	-113	Inter	antisense
NC_016856.1_2008477	2008477	-	gene	2008612	2009178	+	STM14_2314	135	Inter	antisense
NC_016856.1_2008478	2008478	-	gene	2008612	2009178	+	STM14_2314	134	Inter	antisense
NC_016856.1_2008582	2008582	+	gene	2008612	2009178	+	STM14_2314	30	Inter	sense
NC_016856.1_2008602	2008602	+	gene	2008612	2009178	+	STM14_2314	10	Inter	sense
NC_016856.1_2009780	2009780	-	gene	2009175	2009993	+	STM14_2315	0	Intra	antisense
NC_016856.1_2012656	2012656	-	gene	2012429	2013175	-	STM14_2319	0	Intra	sense
NC_016856.1_2013946	2013946	+	gene	2014001	2015734	+	STM14_2322	55	Inter	sense
NC_016856.1_2014698	2014698	+	gene	2014001	2015734	+	STM14_2322	0	Intra	sense
NC_016856.1_2014700	2014700	+	gene	2014001	2015734	+	STM14_2322	0	Intra	sense
NC_016856.1_2014739	2014739	+	gene	2014001	2015734	+	STM14_2322	0	Intra	sense
NC_016856.1_2014795	2014795	+	gene	2014001	2015734	+	STM14_2322	0	Intra	sense
NC_016856.1_2015807	2015807	-	gene	2014001	2015734	+	STM14_2322	-73	Inter	antisense
NC_016856.1_2015901	2015901	+	gene	2015923	2017794	+	STM14_2324	22	Inter	sense
NC_016856.1_2024073	2024073	-	gene	2023687	2024076	-	STM14_2331	0	Intra	sense
NC_016856.1_2027267	2027267	+	gene	2026160	2027821	-	STM14_2334	0	Intra	antisense
NC_016856.1_2027845	2027845	-	gene	2026160	2027821	-	STM14_2334	-24	Inter	sense
NC_016856.1_2032574	2032574	-	gene	2032540	2033124	-	STM14_2340	0	Intra	sense
NC_016856.1_2033581	2033581	-	gene	2033121	2033471	-	STM14_2341	-110	Inter	sense
NC_016856.1_2033674	2033674	-	gene	2033121	2033471	-	STM14_2341	-203	Inter	sense
NC_016856.1_2033828	2033828	-	gene	2034145	2034261	+	STM14_2343	317	Inter	antisense
NC_016856.1_2034224	2034224	+	gene	2034145	2034261	+	STM14_2343	0	Intra	sense
NC_016856.1_2036954	2036954	-	gene	2036100	2036903	-	STM14_2346	-51	Inter	sense
NC_016856.1_2038488	2038488	+	gene	2038645	2039148	+	STM14_2350	157	Inter	sense
NC_016856.1_2040197	2040197	+	gene	2040221	2040556	+	STM14_2352	24	Inter	sense
NC_016856.1_2040757	2040757	+	gene	2040796	2041293	+	STM14_2353	39	Inter	sense
NC_016856.1_2041767	2041767	+	gene	2041805	2043016	+	STM14_2355	38	Inter	sense
NC_016856.1_2044114	2044114	-	gene	2043994	2044320	-	STM14_2357	0	Intra	sense
NC_016856.1_2044124	2044124	-	gene	2043994	2044320	-	STM14_2357	0	Intra	sense
NC_016856.1_2044393	2044393	-	gene	2043994	2044320	-	STM14_2357	-73	Inter	sense
NC_016856.1_2044394	2044394	-	gene	2043994	2044320	-	STM14_2357	-74	Inter	sense
NC_016856.1_2044447	2044447	-	gene	2044533	2045972	-	STM14_2358	86	Inter	sense
NC_016856.1_2046853	2046853	-	gene	2046767	2046853	-	STM14_2360	0	Intra	sense
NC_016856.1_2046938	2046938	-	gene	2046865	2046938	-	STM14_2361	0	Intra	sense
NC_016856.1_2047031	2047031	-	gene	2046991	2047066	-	STM14_2362	0	Intra	sense
NC_016856.1_2047032	2047032	-	gene	2046991	2047066	-	STM14_2362	0	Intra	sense
NC_016856.1_2047059	2047059	-	gene	2046991	2047066	-	STM14_2362	0	Intra	sense
NC_016856.1_2047066	2047066	-	gene	2046991	2047066	-	STM14_2362	0	Intra	sense
NC_016856.1_2047325	2047325	+	gene	2047218	2047766	-	STM14_2363	0	Intra	antisense
NC_016856.1_2047799	2047799	-	gene	2047823	2049655	-	STM14_2364	24	Inter	sense
NC_016856.1_2048272	2048272	-	gene	2047823	2049655	-	STM14_2364	0	Intra	sense
NC_016856.1_2049825	2049825	-	gene	2049652	2050308	-	STM14_2365	0	Intra	sense
NC_016856.1_2050178	2050178	-	gene	2049652	2050308	-	STM14_2365	0	Intra	sense
NC_016856.1_2050351	2050351	-	gene	2049652	2050308	-	STM14_2365	-43	Inter	sense
NC_016856.1_2051077	2051077	-	gene	2051063	2051785	-	STM14_2368	0	Intra	sense
NC_016856.1_2051505	2051505	-	gene	2051063	2051785	-	STM14_2368	0	Intra	sense
NC_016856.1_2051867	2051867	+	gene	2051063	2051785	-	STM14_2368	-82	Inter	antisense
NC_016856.1_2052465	2052465	+	gene	2052017	2052769	-	STM14_2369	0	Intra	antisense
NC_016856.1_2054634	2054634	-	gene	2054595	2055395	-	STM14_2372	0	Intra	sense
NC_016856.1_2055479	2055479	-	gene	2055542	2056093	-	STM14_2373	63	Inter	sense
NC_016856.1_2055537	2055537	-	gene	2055542	2056093	-	STM14_2373	5	Inter	sense
NC_016856.1_2056889	2056889	-	gene	2056152	2056871	-	STM14_2374	-18	Inter	sense
NC_016856.1_2056901	2056901	-	gene	2056152	2056871	-	STM14_2374	-30	Inter	sense
NC_016856.1_2059605	2059605	-	gene	2059063	2060550	-	STM14_2378	0	Intra	sense
NC_016856.1_2059842	2059842	-	gene	2059063	2060550	-	STM14_2378	0	Intra	sense
NC_016856.1_2060612	2060612	-	gene	2059063	2060550	-	STM14_2378	-62	Inter	sense
NC_016856.1_2060775	2060775	+	gene	2060807	2062210	+	STM14_2380	32	Inter	sense
[truncated: 2,876 more rows]
