# Supplementary material for: Cappable-Seq Reveals Specific Patterns of Metabolism and Virulence for Salmonella Typhimurium Intracellular Survival within Acanthamoeba castellanii
Source: Int J Mol Sci. 2021 Aug 23;22(16):9077. doi: 10.3390/ijms22169077 (PMC8396566; doi:10.3390/ijms22169077)
Supplement: Supplementary file 1 [file ijms-22-09077-s001.zip › Supplementary #3 Differential expression of operons.xlsx]

## Sheet: DE_S_SA_feature_counts
Dataset S3: RNA-seq statistics
Operon_id	baseMean	log2FoldChange	lfcSE	stat	pvalue	padj	Description
O1220326	41.8492	1.55307	0.404414	-3.84029	0.000122889	0.000955273	STM14_0010:hypothetical protein;STM14_0011:hypothetical protein;
O1220327	990.792	-3.04784	0.408562	7.45993	8.65714e-14	4.242e-12	STM14_0013:molecular chaperone DnaK;STM14_0014:chaperone protein DnaJ;
O3409600	9.6433	-2.98519	1.02209	2.92066	0.0034929	0.0171152	STM14_0015:hypothetical protein;
O3409608	13.0616	-3.46356	0.98523	3.51549	0.000438944	0.00289325	STM14_0025:putative cytoplasmic protein;
O3409620	310.674	3.24435	0.454646	-7.136	9.60859e-13	3.63447e-11	STM14_0052:30S ribosomal protein S20;
O1220334	85.2036	-1.04164	0.368493	2.82676	0.00470222	0.0218066	STM14_0053:putative cytoplasmic protein;STM14_0054:bifunctional riboflavin kinase/FMN adenylyltransferase;STM14_0055:isoleucyl-tRNA synthetase;STM14_0056:lipoprotein signal peptidase;
O1220340	3020.82	2.08815	0.275087	-7.59085	3.1782e-14	1.83417e-12	STM14_0077:carbamoyl phosphate synthase small subunit;STM14_0078:carbamoyl phosphate synthase large subunit;
O3409636	407.439	2.17786	0.315883	-6.89452	5.40481e-12	1.82289e-10	STM14_0106:dihydrofolate reductase;
O1220347	26.7416	-2.50034	0.624502	4.00373	6.23503e-05	0.000536171	STM14_0121:L-arabinose isomerase;STM14_0122:ribulokinase;
O3409643	167.867	1.70262	0.437337	-3.89315	9.89517e-05	0.000794816	STM14_0124:hypothetical protein;
O3409647	23.1971	1.36894	0.502287	-2.72542	0.006422	0.0278429	STM14_0138:leucine transcriptional activator;
O3409648	10.2736	-2.27313	0.908507	2.50205	0.0123477	0.0461838	STM14_0141:hypothetical protein;
O3409655	462.136	1.23379	0.483618	-2.55116	0.0107365	0.0410064	STM14_0182:transcriptional regulator PdhR;
O1220358	33.9793	-1.77276	0.673179	2.63342	0.00845303	0.034193	STM14_0183:pyruvate dehydrogenase subunit E1;STM14_0184:dihydrolipoamide acetyltransferase;
O3409660	183.574	-1.31309	0.372189	3.528	0.000418705	0.00277392	STM14_0190:bifunctional aconitate hydratase 2/2-methylisocitrate dehydratase;
O3409662	4821.09	-1.79755	0.320154	5.61466	1.96947e-08	3.70631e-07	STM14_0192:hypothetical protein;
O3409667	419.35	1.91528	0.243771	-7.8569	3.93742e-15	2.84041e-13	STM14_0203:carbonic anhydrase;
O3409669	956.277	-1.16626	0.403521	2.89021	0.00384986	0.0186184	STM14_0211:putative PTS enzyme;
O3409670	60.8149	2.15813	0.389339	-5.54305	2.9724e-08	5.39812e-07	STM14_0212:putative xylanase/chitin deacetylase;
O1220364	52.7262	2.52529	0.486784	-5.18769	2.12914e-07	3.39226e-06	STM14_0217:2-amino-4-hydroxy-6-hydroxymethyldihydropteridine pyrophosphokinase;STM14_0218:poly(A) polymerase I;
O3409674	12.3305	6.40782	1.26529	-5.06433	4.09843e-07	6.08207e-06	STM14_0227:hypothetical protein;
O1220368	28.9413	2.65174	0.457021	-5.80222	6.54427e-09	1.34885e-07	STM14_0228:ferrichrome outer membrane transporter;STM14_0229:iron-hydroxamate transporter ATP-binding subunit;STM14_0230:iron-hydroxamate transporter substrate-binding subunit;STM14_0231:iron-hydroxamate transporter permease subunit;STM14_0232:hypothetical protein;
O3409678	8.12653	-2.7236	1.03445	2.6329	0.00846597	0.034193	STM14_0248:deoxyguanosinetriphosphate triphosphohydrolase;
O3409680	174.545	1.21247	0.311477	-3.89264	9.91607e-05	0.000794816	STM14_0250:carbohydrate diacid transcriptional activator CdaR;
O3409684	86.8601	1.22554	0.402856	-3.04213	0.00234914	0.0121528	STM14_0259:uridylate kinase;
O3409688	825.025	1.35855	0.256815	-5.29	1.22315e-07	1.98533e-06	STM14_0284:prolyl-tRNA synthetase;
O1220380	52.818	3.32814	0.505365	-6.5856	4.53039e-11	1.33482e-09	STM14_0287:DL-methionine transporter substrate-binding subunit;STM14_0288:DL-methionine transporter permease;STM14_0289:DL-methionine transporter ATP-binding subunit;
O3409694	29.1792	-1.69024	0.585675	2.88598	0.00390198	0.0188005	STM14_0303:hypothetical protein;
O3411633	4.96279	-4.45448	1.41332	3.15179	0.0016227	0.00885327	STM14_0311:Asp tRNA;
O3409719	2.83642	3.89993	1.43794	-2.71216	0.00668473	0.0287421	STM14_0363:hypothetical protein;
O3409724	166.916	-1.12265	0.287662	3.90266	9.51394e-05	0.000774536	STM14_0368:hypothetical protein;
O1220392	235.028	2.63346	0.350269	-7.51838	5.54608e-14	3.00066e-12	STM14_0373:xanthine-guanine phosphoribosyltransferase;STM14_0374:fermentation/respiration switch protein;STM14_0375:DNA-binding transcriptional regulator Crl;
O3409738	13.712	1.83804	0.569524	-3.22733	0.00124949	0.00708501	STM14_0403:hypothetical protein;
O1220405	31.0566	-1.41717	0.528642	2.68078	0.00734499	0.0308157	STM14_0432:methylcitrate synthase;STM14_0433:2-methylcitrate dehydratase;STM14_0434:propionyl-CoA synthetase;
O3409756	347.799	-2.55444	0.356719	7.16092	8.01387e-13	3.20185e-11	STM14_0445:putative inner membrane protein;
O3409759	78.497	1.08225	0.325061	-3.32937	0.000870432	0.00527247	STM14_0448:D-alanyl-alanine synthetase A;
O3409763	3001.79	1.20001	0.237327	-5.05637	4.27316e-07	6.30533e-06	STM14_0452:hypothetical protein;
O3409765	1843.97	-1.15172	0.224062	5.1402	2.74451e-07	4.26367e-06	STM14_0454:hypothetical protein;
O1220408	727.93	1.67535	0.283878	-5.90166	3.59857e-09	7.72355e-08	STM14_0459:shikimate kinase;STM14_0460:hypothetical protein;
O1220411	16.1144	1.7472	0.616905	-2.83221	0.00462282	0.0215538	STM14_0467:exonuclease subunit SbcC;STM14_0468:exonuclease subunit SbcD;
O3409772	70.5694	-1.77831	0.380624	4.67208	2.98164e-06	3.61838e-05	STM14_0473:branched-chain amino acid transporter;
O3409775	581.817	1.56134	0.312246	-5.00036	5.72235e-07	8.16535e-06	STM14_0476:putative thiol-alkyl hydroperoxide reductase;
O3409780	516.715	-1.80778	0.362916	4.98126	6.31732e-07	8.96507e-06	STM14_0490:hypothetical protein;
O3409782	534.288	1.17633	0.27117	-4.33798	1.43796e-05	0.000154313	STM14_0514:nucleotide-binding protein;
O3409783	83.4992	1.3017	0.323624	-4.02227	5.76405e-05	0.000504015	STM14_0515:putative transport protein;
O1220425	424.084	2.75568	0.272465	-10.1139	4.79385e-24	9.57664e-22	STM14_0524:muropeptide transporter;STM14_0525:hypothetical protein;
O3409787	829.589	3.07565	0.426731	-7.20747	5.70018e-13	2.31302e-11	STM14_0529:trigger factor;
O1220427	46.3418	-1.54372	0.474289	3.2548	0.00113471	0.00656311	STM14_0539:queuosine biosynthesis protein QueC;STM14_0540:putative ABC transporter periplasmic binding protein;
O3409795	255.103	-3.11178	0.459392	6.77369	1.25535e-11	4.02487e-10	STM14_0541:putative hydrolase;
O3409796	148.215	6.24531	0.615518	-10.1464	3.43735e-24	7.43899e-22	STM14_0542:putative cysteine synthase/cystathionine beta-synthase;
O3409799	11.4852	2.83369	0.75468	-3.75482	0.000173463	0.00130954	STM14_0550:putative methyltransferase;
O3411635	4600.19	-2.13008	0.304646	6.99197	2.7106e-12	9.76956e-11	STM14_0551:4.5S ribosomal RNA;
O3409803	84.6904	1.63172	0.384455	-4.24423	2.19347e-05	0.000220793	STM14_0561:DNA-binding transcriptional repressor AcrR;
O3409806	57.1504	-1.17554	0.422703	2.78101	0.00541907	0.024181	STM14_0564:putative transposase;
O1220435	60.2023	1.73254	0.342096	-5.06447	4.09544e-07	6.08207e-06	STM14_0574:adenylate kinase;STM14_0575:hypothetical protein;STM14_0576:ferrochelatase;
O3409811	7.16874	-2.94108	1.17628	2.50031	0.0124084	0.0462997	STM14_0579:putative cation:proton antiport protein;
O1220440	21.0834	1.60272	0.614751	-2.6071	0.00913121	0.036149	STM14_0600:ABC transporter ATP-binding protein;STM14_0601:ABC transporter ATP-binding protein;STM14_0602:putative ABC transporter permease;
O1220441	143.72	-2.42192	0.361328	6.70284	2.04412e-11	6.39588e-10	STM14_0603:tRNA 2-selenouridine synthase;STM14_0604:DNA-binding transcriptional activator AllS;
O1220447	72.6643	1.44155	0.402809	-3.57875	0.000345247	0.0023503	STM14_0623:phosphoribosylaminoimidazole carboxylase ATPase subunit;STM14_0624:phosphoribosylaminoimidazole carboxylase catalytic subunit;STM14_0625:UDP-2,3-diacylglucosamine hydrolase;STM14_0626:peptidyl-prolyl cis-trans isomerase B;
O3409825	115.184	2.03365	0.376207	-5.40567	6.45666e-08	1.11786e-06	STM14_0627:cysteinyl-tRNA synthetase;
O3411636	32.0849	1.65753	0.589549	-2.81153	0.00493071	0.0226638	STM14_0646:Arg tRNA;
O3411637	97.8011	2.89447	0.40435	-7.15834	8.16591e-13	3.21316e-11	STM14_0653:Xaa tRNA;
O3409838	603.902	5.40122	0.509403	-10.603	2.88452e-26	1.07016e-23	STM14_0658:pyridine nucleotide-disulfide oxidoreductase;
O3409839	9.77372	-3.30539	1.1559	2.85959	0.00424195	0.0200297	STM14_0659:hypothetical protein;
O1220452	122.432	3.10889	0.491601	-6.32401	2.54867e-10	6.8236e-09	STM14_0660:hypothetical protein;STM14_0661:putative inner membrane protein;
O3409848	5.39133	-4.57313	1.38952	3.29116	0.00099776	0.00590246	STM14_0679:putative inner membrane protein;
O1220457	13.4572	2.73488	0.702159	-3.89496	9.82149e-05	0.00079317	STM14_0684:enterobactin/ferric enterobactin esterase;STM14_0685:putative cytoplasmic protein;STM14_0686:enterobactin synthase subunit F;
O3409849	403.747	1.23	0.254932	-4.82483	1.40122e-06	1.79259e-05	STM14_0687:ferric enterobactin transport protein FepE;
O3409850	24.628	3.55274	0.590435	-6.01716	1.775e-09	3.99388e-08	STM14_0691:enterobactin exporter EntS;
O3409851	183.858	2.54645	0.351734	-7.23969	4.49708e-13	1.91458e-11	STM14_0692:iron-enterobactin transporter periplasmic binding protein;
O3409852	85.3482	-2.21818	0.412159	5.38186	7.37216e-08	1.25134e-06	STM14_0700:putative cytoplasmic protein;
O3409853	57.3478	2.20427	0.692519	-3.18297	0.00145773	0.00807192	STM14_0701:hypothetical protein;
O1220462	409.252	3.66765	0.313483	-11.6997	1.27952e-31	5.53819e-29	STM14_0707:alkyl hydroperoxide reductase subunit C;STM14_0708:alkyl hydroperoxide reductase F52a subunit;
O3409861	4849.41	-1.93388	0.25232	7.66441	1.79649e-14	1.19628e-12	STM14_0717:nucleoside diphosphate kinase regulator;
O3409867	33.7727	-1.77907	0.545918	3.25886	0.00111861	0.00649894	STM14_0732:cold shock protein CspE;
O3409876	34.9047	-1.40676	0.545142	2.58054	0.00986457	0.0380658	STM14_0751:alpha ribazole-5'-P phosphatase;
O3409877	50.9594	-2.11619	0.46364	4.56429	5.01188e-06	5.9163e-05	STM14_0752:threonine-phosphate decarboxylase;
O1220470	238.62	-6.97606	0.72868	9.57355	1.03293e-21	1.91609e-19	STM14_0757:putative hydrolase;STM14_0758:putative hydrolase;STM14_0759:2-keto-3-deoxygluconate permease;STM14_0760:putative sigma-54 dependent transcriptional regulator;
O3409878	9704.95	-2.31083	0.251387	9.1923	3.84542e-20	5.25608e-18	STM14_0761:hypothetical protein;
O1220472	619.706	-1.83076	0.306047	5.98197	2.20451e-09	4.89325e-08	STM14_0768:putative cytoplasmic protein;STM14_0769:ribonucleoside hydrolase 1;STM14_0770:glutamate/aspartate transporter;STM14_0771:glutamate/aspartate transporter;STM14_0772:glutamate/aspartate transporter;
O3409884	118.719	-2.86233	0.374778	7.63741	2.21642e-14	1.43901e-12	STM14_0782:2-octaprenyl-3-methyl-6-methoxy-1,4-benzoquinol hydroxylase;
O3409885	74.3955	-2.11365	0.491027	4.30455	1.67323e-05	0.000176642	STM14_0783:putative inner membrane protein;
O1220478	40.2279	3.16626	0.434761	-7.28276	3.2706e-13	1.43962e-11	STM14_0810:flavodoxin FldA;STM14_0811:LexA regulated protein;
O3409901	92.5911	1.44979	0.361876	-4.00631	6.16744e-05	0.000533895	STM14_0835:putative phage integrase;
O1220487	104.414	-2.52316	0.385047	6.55287	5.64421e-11	1.61077e-09	STM14_0855:alpha-ketoglutarate decarboxylase;STM14_0856:dihydrolipoamide acetyltransferase;
O1220490	1230.74	1.54935	0.261945	-5.9148	3.32271e-09	7.19089e-08	STM14_0866:acyl-CoA thioester hydrolase YbgC;STM14_0867:colicin uptake protein TolQ;STM14_0868:colicin uptake protein TolR;STM14_0869:cell envelope integrity inner membrane protein TolA;
O3411648	10.5257	7.18286	1.33972	-5.36147	8.25466e-08	1.39204e-06	STM14_0877:Lys tRNA;
O3411649	36.7629	2.31973	0.654321	-3.54525	0.000392239	0.00261862	STM14_0878:Lys tRNA;
O3409917	108.872	1.32142	0.3286	-4.02136	5.78634e-05	0.000504266	STM14_0887:transcriptional regulator;
O1220494	3.16185	-3.80313	1.52661	2.49122	0.0127304	0.0470954	STM14_0894:putative ABC transport protein;STM14_0895:putative ABC-type cobalamin/Fe3+-siderophore transport component;
O1220498	279.003	-1.2611	0.33348	3.78165	0.000155792	0.00119348	STM14_0913:imidazolonepropionase;STM14_0914:formimidoylglutamase;STM14_0915:histidine utilization repressor;
O3409965	22.17	1.39426	0.491197	-2.8385	0.00453262	0.0211713	STM14_1016:multidrug translocase;
O3409968	262.341	1.24388	0.291859	-4.26191	2.0269e-05	0.000209715	STM14_1021:hypothetical protein;
O3409970	4278.34	2.40254	0.303079	-7.9271	2.24316e-15	1.69856e-13	STM14_1023:glutaredoxin;grxA
O3409971	223.619	1.08549	0.27512	-3.94551	7.96293e-05	0.000662811	STM14_1027:putative cytoplasmic protein;
O1220522	33.873	1.62411	0.435466	-3.72959	0.000191788	0.00142307	STM14_1028:putrescine ABC transporter periplasmic substrate-binding protein;STM14_1029:putrescine ABC transporter ATP-binding protein;STM14_1030:putrescine ABC transporter membrane protein;STM14_1031:putrescine ABC transporter membrane protein;STM14_1032:putative inner membrane protein;
O1220525	76.192	1.16793	0.352154	-3.31653	0.000911424	0.00546644	STM14_1040:arginine transporter permease subunit ArtM;STM14_1041:arginine transporter permease subunit ArtQ;STM14_1042:arginine transport system;STM14_1043:arginine transporter ATP-binding subunit;
O1220527	307.814	-1.117	0.342305	3.26316	0.00110177	0.00644435	STM14_1047:putative nucleoside-diphosphate-sugar epimerase;STM14_1048:putative nucleoside-diphosphate-sugar epimerase;STM14_1049:L-threonine aldolase;STM14_1050:pyruvate dehydrogenase;
O3409975	83.6643	1.17448	0.428636	-2.74005	0.00614303	0.0269029	STM14_1054:putative inner membrane protein;
O3409978	106.159	1.72596	0.453439	-3.80638	0.000141015	0.00108348	STM14_1057:VirK-like protein;
O3409985	18651.9	1.80945	0.244389	-7.40397	1.32172e-13	6.12947e-12	STM14_1083:leucine-responsive transcriptional regulator;
O1220537	1124.77	-2.56543	0.319646	8.02586	1.00819e-15	8.18212e-14	STM14_1085:outer-membrane lipoprotein carrier protein;STM14_1086:recombination factor protein RarA;STM14_1087:hypothetical protein;STM14_1088:seryl-tRNA synthetase;
O3409988	211.861	2.29646	0.417995	-5.494	3.92929e-08	7.03749e-07	STM14_1094:MFS family transporter;
O3409992	684.839	-1.88527	0.272313	6.92315	4.41701e-12	1.53634e-10	STM14_1098:SopD-like protein;
O3409993	10.6246	3.73463	0.785701	-4.75325	2.00176e-06	2.47551e-05	STM14_1101:putative cytoplasmic protein;
O3409994	254.218	2.03414	0.256687	-7.92458	2.28917e-15	1.69856e-13	STM14_1105:phosphoserine aminotransferase;
O3409998	51.0154	-1.68452	0.418758	4.02265	5.75463e-05	0.000504015	STM14_1111:integration host factor subunit beta;
O1220542	25.2243	-1.96202	0.618071	3.17442	0.00150135	0.00826062	STM14_1112:hypothetical protein;STM14_1113:lipid transporter ATP-binding/permease;STM14_1114:tetraacyldisaccharide 4'-kinase;STM14_1115:putative cytoplasmic protein;STM14_1116:hypothetical protein;STM14_1117:3-deoxy-manno-octulosonate cytidylyltransferase;
O1220545	5213.01	2.39841	0.336133	-7.13532	9.65648e-13	3.63447e-11	STM14_1129:hypothetical protein;STM14_1130:outer membrane protein F;
O3410005	196.631	-1.65719	0.344139	4.81548	1.46845e-06	1.86027e-05	STM14_1132:asparaginyl-tRNA synthetase;
O3410009	296.718	1.08077	0.2518	-4.29217	1.76933e-05	0.000186031	STM14_1155:hypothetical protein;
O3410011	192.481	-1.29219	0.351949	3.67151	0.000241123	0.00172982	STM14_1163:hypothetical protein;
O3410016	70.1656	-1.31837	0.505323	2.60896	0.00908173	0.0361183	STM14_1184:superoxide dismutase precursor;
O3410017	33.9347	-2.3984	0.52925	4.53169	5.85132e-06	6.78387e-05	STM14_1192:tail fiber assembly protein;
O3410022	40.2252	-1.58798	0.441577	3.59616	0.000322944	0.00221875	STM14_1200:dihydroorotate dehydrogenase 2;
O3410024	216.657	1.04012	0.282055	-3.68765	0.000226333	0.00165574	STM14_1202:putative cytoplasmic protein;
O3410025	21.0428	1.70703	0.531266	-3.21313	0.00131295	0.00739641	STM14_1203:putative iron-sulfur protein;
O1220563	125.435	3.06873	0.478721	-6.41027	1.45259e-10	4.01318e-09	STM14_1204:23S rRNA m(2)G2445 methyltransferase;STM14_1205:ABC transporter ATPase;STM14_1206:paraquat-inducible protein A;STM14_1207:paraquat-inducible protein B;STM14_1208:putative outer membrane protein;
O1220566	157.644	1.23398	0.304056	-4.05841	4.94071e-05	0.000442449	STM14_1218:putative transporter;STM14_1219:hypothetical protein;
O3410033	707.044	-1.87071	0.307068	6.09215	1.11404e-09	2.63014e-08	STM14_1222:hypothetical protein;
O3410035	152.227	1.39356	0.338577	-4.11593	3.85624e-05	0.000358866	STM14_1229:sulfurtransferase TusE;
O1220570	63.6577	1.06514	0.374658	-2.84298	0.00446944	0.0209515	STM14_1236:pathogenicity island-encoded protein C;STM14_1237:secreted effector protein;
O1220576	114.505	-2.11487	0.432429	4.89068	1.00489e-06	1.32472e-05	STM14_1263:chaperone-modulator protein CbpM;STM14_1264:curved DNA-binding protein CbpA;
O3410050	388.659	-1.67139	0.266016	6.28303	3.32042e-10	8.71024e-09	STM14_1270:glucose-1-phosphatase/inositol phosphatase;
O3410051	3.41064	-3.91294	1.55812	2.51132	0.012028	0.0452051	STM14_1273:hypothetical protein;
O3410057	36.5577	-2.07445	0.549033	3.77838	0.000157852	0.00120571	STM14_1286:hypothetical protein;
O3411652	3273.01	-1.57083	0.33886	4.63563	3.55857e-06	4.29842e-05	STM14_1297:Ser tRNA;
O3410066	47.2177	1.21286	0.405205	-2.99319	0.00276075	0.0138679	STM14_1312:hypothetical protein;
O3410069	591.466	-2.41983	0.367328	6.58766	4.46821e-11	1.33379e-09	STM14_1321:drug efflux system protein MdtG;
O3410074	280.979	-1.07522	0.329278	3.2654	0.00109311	0.00640815	STM14_1330:biofilm formation regulatory protein BssS;
O1220596	5.66931	3.26225	0.977668	-3.33677	0.000847582	0.00517923	STM14_1345:flagellar basal body rod protein FlgB;STM14_1346:flagellar basal body rod protein FlgC;STM14_1347:flagellar basal body rod modification protein;STM14_1348:flagellar hook protein FlgE;STM14_1349:flagellar basal body rod protein FlgF;STM14_1350:flagellar basal body rod protein FlgG;STM14_1351:flagellar basal body L-ring protein;STM14_1352:flagellar basal body P-ring protein;STM14_1353:pe…
O3410083	120.758	-1.20792	0.413714	2.91969	0.00350382	0.0171364	STM14_1360:putative inner membrane lipoprotein;
O1220597	541.69	1.75322	0.444155	-3.94731	7.90348e-05	0.000659978	STM14_1363:hypothetical protein;STM14_1364:50S ribosomal protein L32;
O3410092	2431.23	-2.38878	0.340132	7.02308	2.17026e-12	7.93824e-11	STM14_1386:hypothetical protein;
O3410094	249.018	-1.37949	0.446026	3.09284	0.00198251	0.0104646	STM14_1388:putative outer membrane protein;
O3410095	376.672	-4.57233	0.448641	10.1915	2.16389e-24	5.10875e-22	STM14_1399:hypothetical protein;
O3410100	1091.95	-1.48259	0.343286	4.31881	1.5687e-05	0.000167651	STM14_1407:putative cytoplasmic protein;
O3410101	138.985	1.01545	0.29812	-3.40618	0.000658786	0.00418305	STM14_1416:isocitrate dehydrogenase;
O3410107	3250.78	-1.64945	0.378479	4.35809	1.31203e-05	0.00014377	STM14_1446:putative bacteriophage protein;
O3410108	4776.67	-1.20309	0.356119	3.37833	0.000729279	0.00456371	STM14_1447:hypothetical protein;
O3410109	55.3292	-1.34444	0.436811	3.07787	0.00208488	0.0109826	STM14_1448:hypothetical protein;
O3410111	137.444	-1.04216	0.298379	3.49274	0.0004781	0.00311966	STM14_1454:hypothetical protein;
O3410114	104.242	-1.50718	0.33284	4.52823	5.94799e-06	6.8653e-05	STM14_1480:PagJ;
O3410115	174.357	-1.71387	0.41387	4.14109	3.45656e-05	0.000324068	STM14_1481:hypothetical protein;
O3410116	235.846	-1.58105	0.282888	5.58898	2.28412e-08	4.26753e-07	STM14_1483:SspH1;
O3410117	200.738	-2.31519	0.310114	7.46563	8.29013e-14	4.14028e-12	STM14_1484:hypothetical protein;
O3410118	102.311	1.04879	0.321817	-3.25896	0.00111821	0.00649894	STM14_1485:isocitrate dehydrogenase;
O3410122	186.327	1.18522	0.293407	-4.03953	5.35593e-05	0.000476347	STM14_1492:macrophage survival protein;
O3410125	53.5745	2.84472	0.563416	-5.04906	4.43983e-07	6.49463e-06	STM14_1495:cold shock-like protein;
O3410129	721.997	-1.55288	0.304944	5.09233	3.53681e-07	5.37141e-06	STM14_1502:hypothetical protein;
O3411653	17.4557	3.0441	0.725448	-4.19616	2.71474e-05	0.000263904	STM14_1503:Arg tRNA;
O3410134	144.346	-3.84351	0.518234	7.41655	1.20214e-13	5.6763e-12	STM14_1509:putative molecular chaperone;
O1220621	32.9148	-2.46572	0.693129	3.55738	0.000374573	0.00251863	STM14_1515:putative ABC transporter periplasmic binding protein;STM14_1516:putative ABC transporter protein;STM14_1517:putative ABC transporter protein;STM14_1518:ABC transporter ATP-binding protein;STM14_1519:ABC transporter ATP-binding protein;
O3410163	26.2934	-2.13634	0.582083	3.67017	0.00024239	0.00173289	STM14_1548:putative regulatory protein;
O1220626	501.176	-2.19412	0.259865	8.44333	3.08416e-17	3.0806e-15	STM14_1554:hypothetical protein;STM14_1555:salivary secreted protein;
O3410165	305.998	-1.75336	0.437913	4.00391	6.23039e-05	0.000536171	STM14_1556:hypothetical protein;
O1220628	20.7487	-2.05849	0.63339	3.24996	0.00115421	0.0066316	STM14_1563:aldose 1-epimerase;STM14_1564:hypothetical protein;
O3410174	219.436	1.26946	0.339325	-3.74114	0.00018319	0.00136708	STM14_1573:protease 4;
O3410181	7729.8	-1.09037	0.292161	3.73208	0.000189905	0.00141313	STM14_1592:DNA-binding transcriptional activator OsmE;
O3410190	61.9026	-1.68668	0.410239	4.11146	3.93163e-05	0.00036308	STM14_1608:putative cytoplasmic protein;
O1220640	112.89	-1.70671	0.433309	3.93878	8.18969e-05	0.000679509	STM14_1619:threonyl-tRNA synthetase;STM14_1620:translation initiation factor IF-3;
O3410197	77.8348	-1.54945	0.495997	3.12392	0.00178458	0.00961528	STM14_1621:50S ribosomal protein L35;
O1220642	66.5736	-1.02313	0.395743	2.58535	0.00972797	0.0379224	STM14_1627:vtamin B12-transporter permease;STM14_1628:putative glutathione peroxidase;STM14_1629:vitamin B12-transporter ATPase;STM14_1630:lipoprotein;
O3410201	174.025	1.10812	0.33018	-3.35612	0.000790429	0.00488749	STM14_1634:hypothetical protein;
O3410202	256.072	1.14067	0.400073	-2.85115	0.00435619	0.0204946	STM14_1635:phospho-2-dehydro-3-deoxyheptonate aldolase;
O3410209	235.939	-2.01412	0.355289	5.66898	1.4365e-08	2.78403e-07	STM14_1646:putative transcriptional regulator;
O1220649	136.94	2.7584	0.584345	-4.7205	2.35265e-06	2.882e-05	STM14_1663:iron-sulfur cluster assembly scaffold protein;STM14_1664:cysteine desulfurase activator complex subunit SufB;STM14_1665:cysteine desulfurase;STM14_1666:cysteine desulfurase activator complex subunit SufD;STM14_1667:selenocysteine lyase;STM14_1668:cysteine desufuration protein SufE;
O3410220	341.486	1.4279	0.276916	-5.15643	2.51698e-07	3.96158e-06	STM14_1672:pyruvate kinase;
O1220654	21.4664	-2.35637	0.659135	3.57494	0.000350314	0.00236918	STM14_1688:secreted effector protein;STM14_1689:outer membrane secretin precursor;STM14_1690:virulence protein;STM14_1691:secretion system effector;
O1220655	20.5646	-2.46718	0.680735	3.62429	0.000289758	0.00202286	STM14_1693:secretion system chaperone protein;STM14_1694:translocation machinery component;STM14_1695:secretion system chaperone;STM14_1696:translocation machinery component;STM14_1697:translocation machinery component;STM14_1698:secreted effector protein;
O1220657	70.3466	-1.88034	0.449436	4.18377	2.86719e-05	0.000273753	STM14_1702:type III secretion system apparatus protein;STM14_1703:type III secretion system apparatus protein;STM14_1704:type III secretion system apparatus protein;STM14_1705:needle complex inner membrane lipoprotein;
O1220659	21.9239	-2.6623	0.741088	3.59242	0.000327626	0.00224497	STM14_1709:type III secretion system apparatus protein;STM14_1710:secretion system apparatus protein SsaV;STM14_1711:type III secretion system ATPase;
O1220661	43.73	-1.87829	0.513981	3.65441	0.000257777	0.00181647	STM14_1715:type III secretion system protein;STM14_1716:type III secretion system apparatus protein;STM14_1717:type III secretion system apparatus protein;STM14_1718:secretion system apparatus protein SsaU;STM14_1719:hypothetical protein;
O3410230	213.974	1.67811	0.293433	-5.71891	1.07209e-08	2.1417e-07	STM14_1725:inner membrane transport protein YdhC;
O3410232	16.9893	1.36537	0.550925	-2.47832	0.0132004	0.0485756	STM14_1727:DNA-binding transcriptional repressor PurR;
O3410233	19.1191	2.01275	0.592083	-3.39944	0.00067525	0.00427713	STM14_1728:hypothetical protein;
O3410234	112.227	-3.19588	0.515836	6.19554	5.80856e-10	1.46455e-08	STM14_1729:superoxide dismutase;
O3410237	78.7154	1.158	0.412821	-2.80508	0.00503046	0.0230002	STM14_1732:ribonuclease T;
O3410238	45.0706	1.63942	0.39455	-4.15518	3.25033e-05	0.000306949	STM14_1742:transcriptional regulator SlyA;
O3410239	1750.32	-1.04557	0.345572	3.02563	0.00248114	0.0126343	STM14_1743:putative outer membrane lipoprotein;
O1220665	129.053	-1.57978	0.347378	4.54772	5.42307e-06	6.34402e-05	STM14_1745:lysozyme inhibitor;STM14_1746:pyridoxamine 5'-phosphate oxidase;
O3410242	42.1901	1.58738	0.448289	-3.54097	0.000398651	0.00264782	STM14_1750:putative tripeptide transporter permease;
O1220667	724.935	1.14832	0.304668	-3.76909	0.000163845	0.00124782	STM14_1752:endonuclease III;STM14_1753:SoxR-reducing system protein RsxE;STM14_1754:electron transport complex protein RnfG;STM14_1755:electron transport complex protein RnfD;STM14_1756:electron transport complex protein RnfC;STM14_1757:electron transport complex protein RnfB;STM14_1758:Na(+)-translocating NADH-quinone reductase subunit E;
O3410244	309.82	1.14441	0.309316	-3.69982	0.000215751	0.00158278	STM14_1759:putative inner membrane protein;
O3410246	24.6066	1.52037	0.482294	-3.15238	0.00161947	0.00885327	STM14_1761:hypothetical protein;
O1220669	482.525	-1.81192	0.295858	6.12429	9.10897e-10	2.21084e-08	STM14_1770:fumarase A;STM14_1771:fumarase A;
O3410260	36.2033	-1.66813	0.508271	3.28197	0.00103084	0.00608429	STM14_1790:hypothetical protein;
O1220674	713.546	1.11323	0.437135	-2.54666	0.010876	0.0414148	STM14_1793:putative protease;STM14_1794:hypothetical protein;STM14_1795:acid shock protein;
O1220678	115.175	-1.45517	0.415576	3.50156	0.000462542	0.00302575	STM14_1814:spermidine N1-acetyltransferase;STM14_1815:hypothetical protein;
O3410277	49.4218	1.56896	0.43576	-3.6005	0.0003176	0.00219364	STM14_1831:hypothetical protein;
O3410278	39.0106	-1.8157	0.525258	3.45677	0.000546683	0.00351419	STM14_1832:hypothetical protein;
O3410281	9.93315	2.60845	0.801977	-3.25252	0.00114385	0.00660131	STM14_1835:O-acetylserine/cysteine export protein;
O1220686	17.6272	-1.72343	0.637832	2.70201	0.00689222	0.0294878	STM14_1864:putative multidrug efflux protein;STM14_1865:hypothetical protein;
O3410294	13.219	1.83348	0.630981	-2.90576	0.00366368	0.0178175	STM14_1869:putative translation initiation inhibitor;
O3410298	81.2331	-1.93568	0.407634	4.74856	2.04873e-06	2.52159e-05	STM14_1878:putative transcriptional regulator;
O3410301	32.0181	-1.53036	0.58078	2.63501	0.00841337	0.0340866	STM14_1886:putative envelope protein;
O1220692	92.6896	2.18841	0.322482	-6.78614	1.1517e-11	3.7387e-10	STM14_1892:formate dehydrogenase-N subunit gamma;STM14_1893:formate dehydrogenase-N beta subunit;STM14_1894:formate dehydrogenase-N subunit alpha;
O1220695	95.9962	-1.87882	0.374464	5.01735	5.23897e-07	7.51691e-06	STM14_1910:putative arylamine N-acetyltransferase;STM14_1911:hypothetical protein;STM14_1912:putative cytoplasmic protein;
O3410314	37.2074	1.2917	0.447084	-2.88916	0.00386272	0.0186459	STM14_1913:hypothetical protein;
O3410319	16.2358	2.66003	0.751182	-3.54113	0.00039842	0.00264782	STM14_1918:hypothetical protein;
O3410322	63.1345	-1.08785	0.433654	2.50856	0.0121225	0.0454944	STM14_1921:putative DNA-binding transcriptional regulator;
O3410330	17.7454	-1.78018	0.687864	2.58798	0.00965392	0.0377011	STM14_1940:secreted effector protein;
O3410331	41.3108	2.31698	0.803252	-2.8845	0.00392037	0.0188541	STM14_1941:hypothetical protein;
O3410337	75.7751	1.1861	0.322168	-3.68162	0.000231758	0.00167654	STM14_1962:glucan biosynthesis protein D;
O3410338	10029.9	-1.5857	0.27046	5.86298	4.5464e-09	9.52178e-08	STM14_1965:putative transcriptional regulator;
O1220707	13.3391	1.57733	0.624172	-2.52708	0.0115015	0.043415	STM14_1968:alcohol dehydrogenase class III;STM14_1969:putative cytoplasmic protein;
O3410349	69.7832	1.17008	0.440134	-2.65846	0.0078499	0.0325566	STM14_1982:putative SAM-dependent methyltransferase;
O3410354	114.301	-1.88047	0.346621	5.42513	5.79122e-08	1.0162e-06	STM14_1992:heat-inducible protein;
O3410361	119.548	-1.00255	0.3677	2.72655	0.00640001	0.027794	STM14_2001:ATP-dependent RNA helicase DbpA;
O3410366	756.52	-1.05553	0.412738	2.55739	0.0105462	0.0403959	STM14_2008:universal stress protein UspE;
O3410375	41.8817	-1.24325	0.43788	2.83925	0.00452194	0.0211594	STM14_2022:oxidoreductase;
O1220715	16.0863	-4.34811	1.08381	4.01188	6.02378e-05	0.000523203	STM14_2034:hypothetical protein;STM14_2035:putative ATPase;
O3410385	658.943	-1.06253	0.295908	3.59075	0.000329723	0.0022534	STM14_2036:thiosulfate:cyanide sulfurtransferase;
O3410402	75.3558	-1.86576	0.429339	4.34567	1.3885e-05	0.000149623	STM14_2062:lipoprotein;
O1220719	228.842	-1.51107	0.379907	3.97747	6.96524e-05	0.000595024	STM14_2066:hypothetical protein;STM14_2067:putative inner membrane protein;
O3410407	3047.38	1.08145	0.215397	-5.02074	5.14734e-07	7.46796e-06	STM14_2071:hypothetical protein;
O3410413	754.904	-1.14312	0.268561	4.25647	2.07678e-05	0.000212339	STM14_2077:hypothetical protein;
O1220721	41.9969	1.14792	0.427661	-2.68418	0.00727082	0.0306034	STM14_2085:trp operon leader peptide;STM14_2086:anthranilate synthase component I;STM14_2087:bifunctional anthranilate synthase/anthranilate phosphoribosyltransferase;STM14_2088:bifunctional indole-3-glycerol phosphate synthase/phosphoribosylanthranilate isomerase;STM14_2089:tryptophan synthase subunit beta;STM14_2090:tryptophan synthase subunit alpha;
O3410419	567.828	-2.02058	0.412971	4.89279	9.94182e-07	1.32405e-05	STM14_2095:outer membrane protein W;
O3410428	501.55	-1.44799	0.355344	4.07491	4.60323e-05	0.000416043	STM14_2113:bifunctional acetaldehyde-CoA/alcohol dehydrogenase;
O1220727	14.1285	2.11874	0.643569	-3.29217	0.000994166	0.00589463	STM14_2121:hypothetical protein;STM14_2122:formyltetrahydrofolate deformylase;
O3410445	2820.59	-1.24272	0.418899	2.96664	0.00301073	0.0149787	STM14_2155:hypothetical protein;
O3410446	1112.92	1.34352	0.241314	-5.56751	2.58412e-08	4.72602e-07	STM14_2156:peptidyl-tRNA hydrolase;
O3410451	20.5205	-2.50096	0.745377	3.3553	0.00079279	0.00489044	STM14_2170:glutamate dehydrogenase-like protein;
O3410453	493.251	-1.70407	0.371411	4.58809	4.4731e-06	5.35329e-05	STM14_2172:trehalase;
O3410460	526.826	-2.23254	0.363026	6.14983	7.75679e-10	1.91851e-08	STM14_2181:hypothetical protein;
O3410463	25.872	-1.6143	0.564305	2.86068	0.00422727	0.0199968	STM14_2184:disulfide bond formation protein B;
O3410465	299.617	-1.17909	0.374746	3.14639	0.001653	0.00899968	STM14_2186:putative cytoplasmic protein;
O1220738	976.607	1.38263	0.316928	-4.36258	1.28536e-05	0.000142046	STM14_2193:septum formation inhibitor;STM14_2194:cell division inhibitor MinD;STM14_2195:cell division topological specificity factor MinE;
O1220739	204.621	-1.72881	0.495396	3.48976	0.000483456	0.00314671	STM14_2197:transposase;STM14_2198:hypothetical protein;
O1220742	65.7616	3.71129	0.615713	-6.02762	1.66387e-09	3.79042e-08	STM14_2208:L-serine deaminase I/L-threonine deaminase I;STM14_2209:diguanylate cyclase;
O1220744	127.862	-1.16866	0.323107	3.61696	0.000298086	0.00207025	STM14_2212:mannose-specific enzyme IIAB;STM14_2213:mannose-specific enzyme IIC;STM14_2214:mannose-specific PTS system protein IID;STM14_2215:hypothetical protein;
O3410487	31.5614	2.37002	0.562034	-4.21686	2.4773e-05	0.000243695	STM14_2244:type III-secreted effector protein;
O3410494	20.1323	-1.70606	0.595285	2.86596	0.00415745	0.0197746	STM14_2251:putative cytoplasmic protein;
O3410502	101.722	-1.4265	0.374748	3.80656	0.000140914	0.00108348	STM14_2265:PagK;
O3410506	135.327	-2.38793	0.533676	4.47448	7.65963e-06	8.57417e-05	STM14_2276:hypothetical protein;
O1220755	647.474	-1.61649	0.278478	5.80472	6.44738e-09	1.33951e-07	STM14_2278:hypothetical protein;STM14_2279:putative inner membrane protein;STM14_2280:hypothetical protein;
O3410510	39.2008	2.23066	0.804988	-2.77105	0.00558763	0.0247207	STM14_2288:phosphoribosylglycinamide formyltransferase 2;
O3410521	144.99	-1.37459	0.325148	4.22758	2.36223e-05	0.000233259	STM14_2312:aspartyl-tRNA synthetase;
O1220767	6.83416	2.45015	0.917496	-2.67048	0.00757433	0.0316247	STM14_2326:flagellar protein;STM14_2327:flagellar biosynthesis protein FlhA;STM14_2328:flagellar biosynthesis protein FlhB;
O1220769	991.327	1.69999	0.243198	-6.99014	2.74616e-12	9.76956e-11	STM14_2334:methyl accepting chemotaxis protein II;STM14_2335:purine-binding chemotaxis protein;STM14_2336:chemotaxis protein CheA;STM14_2337:flagellar motor protein MotB;STM14_2338:flagellar motor protein MotA;STM14_2339:hypothetical protein;STM14_2340:transcriptional activator FlhC;STM14_2341:transcriptional activator FlhD;
O1220771	10.1167	-3.64497	1.20269	3.03069	0.00243996	0.0124736	STM14_2345:trehalose-6-phosphate synthase;STM14_2346:trehalose-6-phosphate phosphatase;
O3410528	219.372	-1.0047	0.318303	3.15643	0.00159711	0.00875043	STM14_2350:ferritin-like protein;
O3410530	94.8725	2.35357	0.400711	-5.87348	4.26743e-09	9.01017e-08	STM14_2352:putative outer membrane lipoprotein;
O3410534	122.999	-1.35947	0.408861	3.32503	0.000884101	0.00532717	STM14_2356:hypothetical protein;
O1220778	56.5922	1.48123	0.509965	-2.90457	0.00367759	0.0178518	STM14_2380:flagellar capping protein;STM14_2381:flagellar protein FliS;STM14_2382:flagellar biosynthesis protein FliT;
O3410541	87.3334	-1.76813	0.389786	4.53616	5.72888e-06	6.6717e-05	STM14_2384:hypothetical protein;
O3410542	78.1453	3.84036	0.367279	-10.4563	1.37168e-25	3.95806e-23	STM14_2387:putative 50S ribosomal protein;
O1220781	20.3191	2.8897	0.588113	-4.91351	8.94612e-07	1.20379e-05	STM14_2396:flagellar basal body-associated protein FliL;STM14_2397:flagellar motor switch protein FliM;STM14_2398:flagellar motor switch protein FliN;STM14_2399:flagellar biosynthesis protein FliO;STM14_2400:flagellar biosynthesis protein FliP;STM14_2401:flagellar biosynthesis protein FliQ;STM14_2402:flagellar biosynthesis protein FliR;
O3410545	17.4316	1.58534	0.611713	-2.59164	0.00955202	0.0374157	STM14_2403:colanic acid capsular biosynthesis activation protein A;
O3410546	3083.21	-1.25868	0.237731	5.29454	1.19314e-07	1.9488e-06	STM14_2404:hypothetical protein;
O3410547	213.836	-1.53148	0.360966	4.24273	2.20817e-05	0.000221413	STM14_2405:putative cytoplasmic protein;
O3411665	7.17965	-3.13239	1.17211	2.67244	0.00753029	0.0315146	STM14_2426:Ser tRNA;
O3410562	219.315	-2.48958	0.327286	7.60672	2.81138e-14	1.73837e-12	STM14_2475:hypothetical protein;
O3410565	69.545	1.61177	0.560938	-2.87335	0.00406146	0.0194386	STM14_2489:putative endoprotease;
O3410572	342.564	-1.25169	0.309537	4.04374	5.2605e-05	0.000469468	STM14_2498:hypothetical protein;
O3410574	23.3204	2.25911	0.561432	-4.02384	5.72571e-05	0.000504015	STM14_2524:hypothetical protein;
O3410578	709.052	-1.02442	0.259288	3.95088	7.7865e-05	0.000652308	STM14_2551:DNA gyrase inhibitor;
O1220799	264.649	-2.18631	0.366975	5.95766	2.55883e-09	5.63159e-08	STM14_2553:thiosulfate reductase cytochrome B subunit;STM14_2554:thiosulfate reductase electron transport protein;STM14_2555:thiosulfate reductase;
O1220800	146.237	-1.03334	0.37441	2.75992	0.00578159	0.025492	STM14_2563:putative transcriptional regulator;STM14_2564:putative dehydratase;
O1220802	17.1469	1.57739	0.599831	-2.62972	0.0085454	0.0344068	STM14_2576:undecaprenol-phosphate galactosephosphotransferase/O-antigen transferase;STM14_2577:phosphomannomutase;STM14_2578:mannose-1-phosphate guanylyltransferase;STM14_2579:rhamnosyl transferase;STM14_2580:mannosyl transferase;
O1220807	4.8071	2.42598	0.953122	-2.5453	0.0109184	0.0415156	STM14_2600:mannose-1-phosphate guanylyltransferase;STM14_2601:glycosyl transferase family protein;STM14_2602:GDP-mannose mannosyl hydrolase;STM14_2603:GDP-fucose synthetase;STM14_2604:GDP-D-mannose dehydratase;STM14_2605:putative colanic acid biosynthesis acetyltransferase WcaF;STM14_2606:glycosyl transferase family protein;
O3410593	16.198	-3.80268	0.990116	3.84064	0.000122715	0.000955273	STM14_2615:putative inner membrane protein;
O3410606	83.447	-1.52348	0.413752	3.68212	0.000231305	0.00167654	STM14_2642:fructose-bisphosphate aldolase;
O1220813	9.13459	-5.33128	1.37421	3.87951	0.000104665	0.000836355	STM14_2643:putative transport protein;STM14_2644:putative glycohydrolase;STM14_2645:putative sugar kinase;
O3410607	166.058	-1.67295	0.371749	4.50022	6.78841e-06	7.73223e-05	STM14_2649:hypothetical protein;
O3410608	80.1655	1.09328	0.425697	-2.5682	0.0102228	0.0393225	STM14_2650:hypothetical protein;
O3410611	150.753	2.52834	0.44921	-5.62843	1.81861e-08	3.47274e-07	STM14_2656:putative outer membrane protein;
O1220817	432.657	-1.84865	0.306476	6.03196	1.61981e-09	3.72271e-08	STM14_2666:putative ABC-type proline/glycine betaine transport system permease component;STM14_2667:putative ABC-type proline/glycine betaine transport system ATPase component;STM14_2668:putative ABC-type proline/glycine betaine transport system permease component;STM14_2669:putative transport protein;
O3410620	69.3934	-1.1713	0.386147	3.03331	0.0024189	0.0124148	STM14_2672:D-lactate dehydrogenase;
O3410626	109.438	-1.49007	0.353888	4.21057	2.54727e-05	0.000248694	STM14_2698:galactose transport protein;
O3410644	728.411	2.2857	0.253919	-9.00169	2.22277e-19	2.88627e-17	STM14_2737:putative outer membrane lipoprotein;
O1220834	33.3155	-2.49097	0.595349	4.18404	2.86371e-05	0.000273753	STM14_2740:putative ABC transporter periplasmic binding protein;STM14_2741:putative ABC-type dipeptide/oligopeptide/nickel transport system permease;STM14_2742:putative ABC-type dipeptide/oligopeptide/nickel transport system permease component;STM14_2743:ABC transporter ATP-binding protein;
O3410647	756.128	-1.44754	0.221957	6.5217	6.95131e-11	1.94114e-09	STM14_2744:hypothetical protein;
O3410648	9.58272	2.48414	0.800525	-3.10313	0.00191484	0.0102112	STM14_2748:putative ATP-dependent helicase;
O3411670	782.541	1.38302	0.348635	-3.96695	7.27985e-05	0.00061688	STM14_2755:Pro tRNA;
O3410652	551.735	2.80045	0.358273	-7.81652	5.43047e-15	3.7113e-13	STM14_2758:O-antigen acetylase;
O1220842	10.9398	2.43074	0.813803	-2.98689	0.00281834	0.0141026	STM14_2786:quinol dehydrogenase membrane component;STM14_2787:quinol dehydrogenase periplasmic component;STM14_2788:nitrate reductase;STM14_2789:assembly protein for periplasmic nitrate reductase;STM14_2790:ferredoxin-type protein;
O3410663	88.0733	-1.85773	0.551028	3.37139	0.000747886	0.00464656	STM14_2792:ecotin;
O1220843	48.9154	-2.47394	0.487603	5.07368	3.90201e-07	5.89158e-06	STM14_2793:multidrug transporter membrane protein/ATP-binding component;STM14_2794:DNA repair system protein;STM14_2795:O6-methylguanine-DNA methyltransferase/transcription activator/repressor;
O1220844	59.2128	1.475	0.346514	-4.2567	2.07469e-05	0.000212339	STM14_2800:phosphotransfer intermediate protein in two-component regulatory system with RcsBC;STM14_2801:transcriptional regulator RcsB;
O1220845	80.3034	1.05554	0.384766	-2.74332	0.00608211	0.0267263	STM14_2803:hypothetical protein;STM14_2804:DNA gyrase subunit A;
O3410671	47.1452	1.36365	0.420055	-3.24636	0.0011689	0.00670118	STM14_2812:ribonucleotide-diphosphate reductase subunit alpha;
O1220848	265.302	-1.62184	0.304008	5.33486	9.56206e-08	1.60211e-06	STM14_2813:ribonucleotide-diphosphate reductase subunit beta;STM14_2814:2Fe-2S ferredoxin;
O1220850	126.199	3.05176	0.620412	-4.91892	8.70247e-07	1.1771e-05	STM14_2819:sn-glycerol-3-phosphate dehydrogenase subunit A;STM14_2820:anaerobic glycerol-3-phosphate dehydrogenase subunit B;STM14_2821:sn-glycerol-3-phosphate dehydrogenase subunit C;STM14_2822:hypothetical protein;STM14_2823:hypothetical protein;STM14_2824:deubiquitinase;
O1220851	120.764	-1.58926	0.373265	4.25773	2.06512e-05	0.000212339	STM14_2825:putative cytoplasmic protein;STM14_2826:putative aldolase;STM14_2827:putative transport protein;STM14_2828:putative galactonate dehydratase;STM14_2829:putative transcriptional regulator;
O1220852	2439.08	-1.36303	0.320785	4.24906	2.14669e-05	0.000218112	STM14_2835:UDP-4-amino-4-deoxy-L-arabinose--oxoglutarate aminotransferase;STM14_2836:undecaprenyl phosphate 4-deoxy-4-formamido-L-arabinose transferase;STM14_2837:bifunctional UDP-glucuronic acid decarboxylase/UDP-4-amino-4-deoxy-L-arabinose formyltransferase;STM14_2838:putative cytoplasmic protein;STM14_2839:4-amino-4-deoxy-L-arabinose transferase;STM14_2840:putative inner membrane protein;STM14…
O1220854	39.6193	1.20692	0.409563	-2.94684	0.00321039	0.0158506	STM14_2849:hypothetical protein;STM14_2850:hypothetical protein;
O3410683	81.5723	-1.26932	0.45026	2.81908	0.0048161	0.0222157	STM14_2854:hypothetical protein;
O3410694	47.1422	-1.68563	0.560254	3.00869	0.00262375	0.0132632	STM14_2889:putative PTS system transporter subunit A component;
O1220861	91.1027	1.54801	0.441857	-3.50341	0.000459335	0.00301235	STM14_2892:putative NTP pyrophosphohydrolase;STM14_2893:phosphodiesterase;
O3410704	21.5143	-4.21528	0.996922	4.22829	2.35471e-05	0.000233259	STM14_2908:putative regulatory protein;
O1220865	846.232	1.85709	0.282054	-6.58417	4.57448e-11	1.33482e-09	STM14_2912:hypothetical protein;STM14_2913:bifunctional folylpolyglutamate synthase/dihydrofolate synthase;STM14_2914:acetyl-CoA carboxylase subunit beta;
O3410710	14.7298	-2.47019	0.774776	3.18826	0.00143131	0.00794253	STM14_2926:putative inner membrane protein;
O3410711	402.95	-1.03856	0.286395	3.62633	0.000287481	0.00201237	STM14_2927:3-oxoacyl-ACP synthase;
O3410714	341.968	-1.21142	0.401827	3.01477	0.00257176	0.0130447	STM14_2936:phosphohistidine phosphatase;
O1220870	350.919	-1.96769	0.334863	5.8761	4.20052e-09	8.94161e-08	STM14_2947:activator;STM14_2948:phosphoglycerate transport system sensor protein;STM14_2949:phosphoglycerate transport regulatory protein precursor;
O3410722	20.7016	-5.53451	1.44158	3.83919	0.000123439	0.000955273	STM14_2950:transporter;
O3410723	2175.08	-1.19078	0.26391	4.51206	6.42008e-06	7.37741e-05	STM14_2951:putative inner membrane protein;
O3410726	5497.34	-1.13617	0.276384	4.11082	3.94257e-05	0.00036308	STM14_2954:aminotransferase;
O3410730	65.4436	-2.34796	0.484637	4.84478	1.26752e-06	1.62958e-05	STM14_2958:indolepyruvate decarboxylase;
O3410731	1706.68	-2.57702	0.339852	7.58278	3.3824e-14	1.86895e-12	STM14_2961:hypothetical protein;
O1220872	346.725	-1.3662	0.321622	4.24784	2.15845e-05	0.000218112	STM14_2967:putative negative regulator;STM14_2968:putative negative regulator;
O3411678	41.4777	2.26716	0.465238	-4.87312	1.09848e-06	1.43354e-05	STM14_2973:Lys tRNA;
O1220874	51.5582	1.69585	0.463262	-3.66068	0.000251548	0.00178489	STM14_2985:cysteine synthase A;STM14_2986:hypothetical protein;
O3410746	419.151	-1.62	0.405981	3.99033	6.59825e-05	0.000565533	STM14_2988:hypothetical protein;
O1220876	25.1089	-1.64004	0.570937	2.87254	0.00407186	0.0194386	STM14_2992:putative cytoplasmic protein;STM14_2993:pyridoxal kinase;
O1220877	28.5036	-2.57281	0.664644	3.87096	0.000108407	0.000863601	STM14_2994:putative regulatory protein;STM14_2995:glutamine amidotransferase;
O3410747	1314.69	-2.69829	0.334114	8.07598	6.69374e-16	5.60763e-14	STM14_3003:short chain dehydrogenase;
O1220880	13.4586	2.10674	0.783792	-2.68788	0.00719075	0.0303649	STM14_3004:putative iron-dependent peroxidase;STM14_3005:hypothetical protein;
O1220887	423.063	1.50888	0.453108	-3.33006	0.000868258	0.00527247	STM14_3035:putative cytoplasmic protein;STM14_3036:hypothetical protein;STM14_3037:hypothetical protein;
O3410756	55.7611	1.46804	0.444003	-3.30637	0.000945126	0.00564251	STM14_3044:aminoglycoside/multidrug efflux system;
O1220889	253.278	-1.29202	0.33075	3.90632	9.37111e-05	0.000767635	STM14_3048:putative acetyltransferase;STM14_3049:putative inner membrane protein;
O3410757	406.211	2.28717	0.61753	-3.70373	0.000212453	0.00156744	STM14_3050:phosphoribosylaminoimidazolesuccinocarboxamide synthase;
O3410758	17.9964	1.69985	0.643018	-2.64355	0.00820428	0.0337128	STM14_3057:putative permease;
O1220894	7.57151	-2.59889	1.04144	2.49547	0.012579	0.046735	STM14_3060:DNA replication initiation factor;STM14_3061:uracil transporter;
O3410759	1363.2	1.45981	0.368199	-3.96474	7.3476e-05	0.000619536	STM14_3062:uracil phosphoribosyltransferase;
O3410761	31.6741	1.28973	0.490366	-2.63015	0.00853479	0.0344068	STM14_3068:putative diguanylate cyclase;
O3410768	162.487	2.09655	0.36473	-5.74822	9.0187e-09	1.81562e-07	STM14_3077:exodeoxyribonuclease VII large subunit;
O3410773	188.792	-1.61304	0.294316	5.48064	4.23786e-08	7.48689e-07	STM14_3089:GTP-binding protein EngA;
O3410777	1063.16	-1.89132	0.306936	6.16194	7.18597e-10	1.79442e-08	STM14_3106:3-mercaptopyruvate sulfurtransferase;
O3410785	4999.08	-2.13126	0.266139	8.00808	1.16517e-15	9.16954e-14	STM14_3121:putative rRNA methylase;
O3410788	576.62	1.09895	0.383898	-2.86261	0.00420169	0.019912	STM14_3124:inositol monophosphatase;
O3410790	157.325	-2.05384	0.322802	6.36256	1.98422e-10	5.40994e-09	STM14_3131:stationary phase inducible protein CsiE;
O3410796	74.2707	8.14043	0.797389	-10.2089	1.8098e-24	4.70005e-22	STM14_3137:lysine/cadaverine antiporter;
O1220911	10435.3	-2.57958	0.290033	8.8941	5.88954e-19	6.95233e-17	STM14_3140:nitrogen regulatory protein P-II 1;STM14_3141:putative transcriptional regulator;STM14_3142:hypothetical protein;STM14_3143:putative sensor kinase;
O3410798	14.7207	2.35274	0.768542	-3.06131	0.00220374	0.0114692	STM14_3145:phosphoribosylformylglycinamidine synthase;
O1220913	61.4104	1.2151	0.365701	-3.32267	0.000891616	0.00536002	STM14_3149:hypothetical protein;STM14_3150:putative phosphotransferase system IIB component;STM14_3151:N-acetylmuramic acid 6-phosphate etherase;
O1220916	20.0998	1.86775	0.660448	-2.82801	0.00468387	0.0217603	STM14_3157:4'-phosphopantetheinyl transferase;STM14_3158:pyridoxal phosphate biosynthetic protein PdxJ;STM14_3159:DNA repair protein RecO;STM14_3160:GTP-binding protein Era;STM14_3161:ribonuclease III;
O1220917	28.1665	1.2765	0.444199	-2.8737	0.00405688	0.0194386	STM14_3162:signal peptidase I;STM14_3163:GTP-binding protein LepA;
O3410810	26.0457	-1.74254	0.668338	2.60727	0.0091266	0.036149	STM14_3211:hypothetical protein;
O1220928	20.4928	2.39025	0.650411	-3.67499	0.000237858	0.00171113	STM14_3219:hypothetical protein;STM14_3220:hypothetical protein;
O3410815	36.5943	1.52066	0.497053	-3.05934	0.00221823	0.0115215	STM14_3237:L-aspartate oxidase;
O3410817	77.9711	-1.17927	0.362092	3.25684	0.00112662	0.00653086	STM14_3241:putative transcriptional regulator;
O3410824	380.625	1.58723	0.635481	-2.49769	0.0125006	0.0465102	STM14_3253:putative cytoplasmic protein;
O3411681	1107.47	3.10582	0.604332	-5.13926	2.75817e-07	4.26367e-06	STM14_3256:23S ribosomal RNA;
O3411682	446.833	1.9669	0.553206	-3.55545	0.000377332	0.0025256	STM14_3257:Glu tRNA;
O3410827	4529.42	-2.99686	0.224892	13.3258	1.63952e-40	1.41928e-37	STM14_3261:protein disaggregation chaperone;
O3410828	548.784	1.51513	0.290722	-5.21163	1.87186e-07	3.00312e-06	STM14_3264:outer membrane protein assembly complex subunit YfiO;
O1220936	26367.9	-1.66364	0.329527	5.04856	4.45146e-07	6.49463e-06	STM14_3266:translation inhibitor protein RaiA;STM14_3267:hypothetical protein;
O3410832	5.13522	3.68214	1.31317	-2.80401	0.0050472	0.0230362	STM14_3273:hypothetical protein;
O1220939	353.152	2.4535	0.535192	-4.58433	4.55441e-06	5.4256e-05	STM14_3276:50S ribosomal protein L19;STM14_3277:tRNA (guanine-N(1)-)-methyltransferase;STM14_3278:16S rRNA-processing protein;STM14_3279:30S ribosomal protein S16;
O3410836	15.7581	-1.64979	0.66126	2.49491	0.0125987	0.0467413	STM14_3285:putative cytoplasmic protein;
O3410841	283.023	-1.2146	0.283425	4.28546	1.82361e-05	0.000190964	STM14_3294:SsrA-binding protein;
O3410843	60.2716	1.2525	0.394443	-3.17537	0.00149647	0.00825125	STM14_3296:hypothetical protein;
O1220943	2182.73	-1.50305	0.320672	4.6872	2.7697e-06	3.37695e-05	STM14_3302:integrase-like protein;STM14_3303:hypothetical protein;STM14_3304:hypothetical protein;
O3410853	10.3958	-4.51406	1.30543	3.45792	0.000544371	0.00350802	STM14_3325:putative dipeptide/oligopeptide/nickel ABC-type transport system periplasmic component;
O3410864	19.6564	-2.57861	0.73934	3.48773	0.000487147	0.0031628	STM14_3341:hypothetical protein;
O3410869	66.5106	1.35636	0.375006	-3.61691	0.000298142	0.00207025	STM14_3348:outer membrane receptor FepA;
O3410870	835.488	-2.26058	0.37458	6.03498	1.58981e-09	3.68638e-08	STM14_3350:secreted effector protein;
O1220953	552.833	1.61725	0.434241	-3.72431	0.000195849	0.00144906	STM14_3361:tricarboxylic transport;STM14_3362:tricarboxylic transport;STM14_3363:tricarboxylic transport;
O1220954	61.5173	-2.34173	0.488497	4.79375	1.63691e-06	2.06362e-05	STM14_3365:hypothetical protein;STM14_3366:hypothetical protein;STM14_3367:succinate-semialdehyde dehydrogenase I;STM14_3368:4-aminobutyrate aminotransferase;
O3410883	165.024	-1.45844	0.302731	4.81763	1.45277e-06	1.84943e-05	STM14_3383:hypothetical protein;
O1220960	18.2657	2.80565	0.684795	-4.09707	4.1842e-05	0.000382618	STM14_3387:glutaredoxin-like protein;STM14_3388:ribonucleotide reductase stimulatory protein;STM14_3389:ribonucleotide-diphosphate reductase subunit alpha;STM14_3390:ribonucleotide-diphosphate reductase subunit beta;
O3410892	663.221	2.58115	0.357856	-7.2128	5.48119e-13	2.25947e-11	STM14_3413:alanyl-tRNA synthetase;
O3410896	5.21031	2.76294	0.979422	-2.82099	0.00478758	0.0221234	STM14_3421:hypothetical protein;
O1220966	41.8825	-1.52848	0.446446	3.42367	0.000617821	0.00394221	STM14_3422:glucitol/sorbitol-specific enzyme IIC component;STM14_3423:PTS system glucitol/sorbitol-specific transporter subunit IIB;STM14_3424:glucitol/sorbitol-specific PTS system component IIA;STM14_3425:sorbitol-6-phosphate dehydrogenase;STM14_3426:DNA-binding transcriptional activator GutM;
O3410897	44.0984	1.65372	0.424001	-3.90026	9.60882e-05	0.000779816	STM14_3427:hypothetical protein;
O3410900	24.8038	-1.92926	0.593349	3.25148	0.00114805	0.00661086	STM14_3456:hypothetical protein;
O1220972	249.407	1.13093	0.343116	-3.29606	0.000980514	0.00582699	STM14_3458:putative periplasmic binding protein;STM14_3459:putative ATP-binding protein;STM14_3460:putative permease;STM14_3461:putative permease;
O3410904	6.34121	3.03148	0.924646	-3.27853	0.0010435	0.00614508	STM14_3464:hypothetical protein;
O1220973	1089.92	1.2693	0.408107	-3.11021	0.00186953	0.00999006	STM14_3467:putative cytoplasmic protein;STM14_3468:needle complex export protein;STM14_3469:needle complex assembly protein;STM14_3470:needle complex inner membrane lipoprotein;STM14_3471:needle complex minor subunit;STM14_3472:needle complex major subunit;STM14_3473:needle complex inner membrane protein;
O1220974	24.7876	1.55709	0.513578	-3.03185	0.00243058	0.0124501	STM14_3475:invasion protein regulator HilC;STM14_3476:invasion protein precursor;
O1220979	10.2648	2.17342	0.822939	-2.64105	0.00826496	0.0337885	STM14_3489:surface presentation of antigens protein SpaP;STM14_3490:surface presentation of antigens protein SpaO;STM14_3491:needle length control protein;STM14_3492:needle complex assembly protein;STM14_3493:ATP synthase SpaL;
O1220980	349.247	1.19969	0.34539	-3.47344	0.000513839	0.00332778	STM14_3494:secretion chaperone;STM14_3495:needle complex export protein;STM14_3496:invasion protein;STM14_3497:outer membrane secretin precursor;STM14_3498:invasion regulatory protein;
O3410908	54.4602	2.46073	0.456048	-5.39577	6.82291e-08	1.17345e-06	STM14_3499:needle complex outer membrane lipoprotein precursor;
O1220988	66.0693	4.45985	0.531208	-8.39568	4.63222e-17	4.45551e-15	STM14_3536:hypothetical protein;STM14_3537:adenylylsulfate kinase;STM14_3538:sulfate adenylyltransferase subunit 1;STM14_3539:sulfate adenylyltransferase subunit 2;
O1220989	49.8514	-1.34608	0.518069	2.59827	0.00936957	0.0368678	STM14_3541:hypothetical protein;STM14_3542:putative cytoplasmic protein;STM14_3543:putative cytoplasmic protein;STM14_3544:putative cytoplasmic protein;STM14_3545:putative cytoplasmic protein;STM14_3546:putative transposase;STM14_3547:putative cytoplasmic protein;STM14_3548:putative helicase;
O3410922	7.80657	2.06499	0.795667	-2.5953	0.00945096	0.0370758	STM14_3550:secreted effector protein;
O1220990	53.6974	3.01082	0.619824	-4.85754	1.18853e-06	1.53563e-05	STM14_3551:phosphoadenosine phosphosulfate reductase;STM14_3552:sulfite reductase subunit beta;STM14_3553:sulfite reductase subunit alpha;
O3410923	31.5703	3.26269	0.655541	-4.9771	6.45442e-07	9.06062e-06	STM14_3554:putative 6-pyruvoyl tetrahydrobiopterin synthase;
O3410924	52.3275	-1.53231	0.489312	3.13157	0.00173877	0.00940747	STM14_3555:putative metal-dependent hydrolase;
O1220993	454.78	-1.23231	0.273459	4.50638	6.59416e-06	7.54407e-05	STM14_3564:GDP/GTP pyrophosphokinase;STM14_3565:23S rRNA 5-methyluridine methyltransferase;
O1220995	1066.47	-1.58298	0.241361	6.55856	5.43289e-11	1.56769e-09	STM14_3572:flavodoxin;STM14_3573:tRNA pseudouridine synthase C;STM14_3574:putative cytoplasmic protein;
O3411689	15627.2	-2.33191	0.244456	9.53917	1.43984e-21	2.49284e-19	STM14_3575:small regulatory RNA CsrB;
O1220996	230.132	-1.32617	0.427461	3.10243	0.00191939	0.0102145	STM14_3578:putative nucleotide binding protein;STM14_3579:hypothetical protein;
O3410933	25.1411	-2.1052	0.669938	3.14238	0.00167581	0.00910478	STM14_3580:hypothetical protein;
O3410939	125.304	1.4517	0.315373	-4.60312	4.16199e-06	5.00402e-05	STM14_3603:murein transglycosylase A;
O3411691	2077.17	1.10263	0.387407	-2.84617	0.00442489	0.0207802	STM14_3605:Met tRNA;
O3410940	131.27	2.35313	0.285972	-8.22851	1.89559e-16	1.64095e-14	STM14_3606:N-acetylmuramoyl-L-alanine amidase;
O3410941	918.122	1.37355	0.375893	-3.65409	0.000258097	0.00181647	STM14_3607:N-acetylglutamate synthase;
O1221008	425.644	1.54398	0.242713	-6.36135	1.99983e-10	5.40994e-09	STM14_3633:hypothetical protein;STM14_3634:bifunctional acyl-[acyl carrier protein] synthetase/2-acylglycerophosphoethanolamine acyltransferase;
O3410950	39.5599	4.24967	0.482111	-8.81473	1.19973e-18	1.29821e-16	STM14_3638:diaminopimelate decarboxylase;
O3410957	3.64142	-4.0082	1.50962	2.6551	0.00792843	0.0327868	STM14_3648:putative inner membrane protein;
O3410958	829.523	-1.24049	0.253624	4.89105	1.003e-06	1.32472e-05	STM14_3649:hypothetical protein;
O3410968	338.161	1.00352	0.274389	-3.65731	0.00025488	0.00180361	STM14_3667:putative inner membrane protein;
O3410971	159.95	-2.25881	0.631237	3.57839	0.000345713	0.0023503	STM14_3682:putative hemolysin;
O1221019	1584.01	3.90765	0.370915	-10.5352	5.94818e-26	1.93093e-23	STM14_3688:glycine cleavage system protein H;STM14_3689:glycine cleavage system aminomethyltransferase T;
O3410979	8.45143	-2.77022	1.06014	2.61308	0.0089731	0.0357959	STM14_3692:hypothetical protein;
O3410982	30472.5	-1.99205	0.348493	5.71619	1.08936e-08	2.15959e-07	STM14_3698:putative ligase;
O3410986	3096.31	-1.12832	0.227715	4.95496	7.23451e-07	9.88843e-06	STM14_3705:hypothetical protein;
O3410990	246.107	1.19644	0.275014	-4.35046	1.3585e-05	0.000148236	STM14_3717:transketolase;
O3410992	123.651	-1.68181	0.405666	4.1458	3.38632e-05	0.000318633	STM14_3719:putative Zn-dependent protease;
O3410993	653.644	-1.19986	0.32405	3.7027	0.000213316	0.00156935	STM14_3720:agmatinase;
O1221024	81.8028	-5.17172	0.699805	7.39023	1.46579e-13	6.67835e-12	STM14_3723:putative mannitol dehydrogenase;STM14_3724:putative malate/L-lactate dehydrogenase;STM14_3725:putative zinc-binding dehydrogenase;STM14_3726:putative mannitol dehydrogenase;
O3410999	6.75258	4.11354	1.00961	-4.07438	4.6138e-05	0.000416043	STM14_3733:S-adenosylmethionine synthetase;
O3411000	8.44403	-2.77121	1.09203	2.53766	0.0111595	0.0423083	STM14_3734:hypothetical protein;
O1221027	69.5083	2.68846	0.402449	-6.68025	2.3853e-11	7.37455e-10	STM14_3738:hypothetical protein;STM14_3739:glutathione synthetase;
O3411005	126.159	-1.16162	0.452286	2.56833	0.0102191	0.0393225	STM14_3750:L-asparaginase II;
O1221030	80.6276	2.58643	0.613898	-4.21312	2.51865e-05	0.000246827	STM14_3752:hypothetical protein;STM14_3753:hypothetical protein;STM14_3754:tRNA (guanine-N(7))-methyltransferase;
O3411007	6.96056	-3.07207	1.1603	2.64766	0.00810515	0.0333669	STM14_3757:hypothetical protein;
O3411693	482.999	4.22833	0.492477	-8.58583	9.01795e-18	9.36785e-16	STM14_3765:Phe tRNA;
O1221035	34.2002	-1.58749	0.573159	2.76972	0.0056105	0.0247797	STM14_3782:putative NAD-dependent aldehyde dehydrogenase;STM14_3783:hypothetical protein;
O3411027	71.3437	-1.2113	0.373421	3.2438	0.00117945	0.00673194	STM14_3804:putative glutathione S-transferase YghU;
O1221040	151.411	-4.98728	0.537837	9.27285	1.81233e-20	2.76861e-18	STM14_3805:hypothetical protein;STM14_3806:putative periplasmic ferrichrome-binding protein;
O1221041	616.515	-1.82946	0.33311	5.49206	3.97262e-08	7.06637e-07	STM14_3807:hydrogenase 2 accessory protein HypG;STM14_3808:hydrogenase nickel incorporation protein HybF;STM14_3809:hydrogenase 2-specific chaperone;STM14_3810:hydrogenase 2 maturation endopeptidase;STM14_3811:hydrogenase 2 large subunit;STM14_3812:putative hydrogenase 2 b cytochrome subunit;STM14_3813:hydrogenase 2 protein HybA;STM14_3814:hydrogenase 2 small subunit;
O3411029	99.1872	-5.08943	1.48101	3.43646	0.000589379	0.00376999	STM14_3816:putative cytoplasmic protein;
O1221042	75.6492	1.23051	0.355411	-3.46222	0.00053574	0.00346099	STM14_3821:putative cytoplasmic protein;STM14_3822:putative cytoplasmic protein;
O3411041	10.6673	3.42559	0.929471	-3.68552	0.000228234	0.00166496	STM14_3839:hypothetical protein;
O3411043	180.388	1.85991	0.278684	-6.6739	2.49097e-11	7.61064e-10	STM14_3846:DNA topoisomerase IV subunit A;
O3411048	8.07449	-5.15503	1.33379	3.86494	0.000111117	0.000877822	STM14_3870:putative cytoplasmic protein;
O3411049	156.534	-1.78999	0.503252	3.55685	0.000375322	0.00251863	STM14_3871:glycogen synthesis protein GlgS;
O3411054	81.4661	2.75141	0.370566	-7.42487	1.12889e-13	5.42915e-12	STM14_3882:bifunctional dihydroneopterin aldolase/dihydroneopterin triphosphate 2'-epimerase;
O3411058	405.579	2.3531	0.348003	-6.76174	1.36347e-11	4.3182e-10	STM14_3886:30S ribosomal protein S21;
O3411060	4.65224	3.51391	1.26719	-2.77299	0.00555444	0.0246158	STM14_3891:putative transporter;
O3411062	67.8388	2.75943	0.369474	-7.46855	8.10857e-14	4.12901e-12	STM14_3893:putative methyl-accepting chemotaxis protein;
O1221059	827.348	-2.38937	0.481815	4.9591	7.08209e-07	9.73132e-06	STM14_3896:putrescine--2-oxoglutarate aminotransferase;STM14_3897:hypothetical protein;
O1221061	109.097	1.19966	0.312503	-3.83889	0.000123593	0.000955273	STM14_3908:hypothetical protein;STM14_3909:hypothetical protein;
O1221062	37.9526	-1.63973	0.492625	3.32855	0.000872994	0.00527247	STM14_3910:hypothetical protein;STM14_3911:putative inner membrane protein;STM14_3912:putative inner membrane protein;STM14_3913:putative inner membrane protein;
O3411074	76.226	2.09932	0.344285	-6.0976	1.0767e-09	2.58907e-08	STM14_3927:DNA-binding transcriptional activator TdcA;
O1221069	451.12	-1.14761	0.355235	3.23056	0.00123549	0.00702093	STM14_3936:putative sugar kinase;STM14_3937:AGA operon transcriptional repressor;
O3411079	106.024	-1.21017	0.400607	3.02085	0.00252069	0.0128106	STM14_3950:putative nucleoside-diphosphate-sugar epimerase;
O3411083	57.2168	-2.06656	0.528677	3.90892	9.2708e-05	0.000761907	STM14_3958:hypothetical protein;
O1221077	248.723	1.86415	0.607596	-3.06807	0.00215449	0.0112844	STM14_3969:translation initiation factor IF-2;STM14_3970:transcription elongation factor NusA;STM14_3971:hypothetical protein;
O3411696	203.384	1.11685	0.380783	-2.93304	0.00335663	0.0164786	STM14_3972:Met tRNA;
O3411091	73.4865	1.21781	0.315165	-3.86404	0.000111526	0.000877822	STM14_3981:ATP-dependent metalloprotease;
O3411093	37.5734	1.54066	0.44627	-3.4523	0.00055583	0.00356417	STM14_3983:RNA-binding protein YhbY;
O1221081	297.852	2.83152	0.46535	-6.08471	1.16701e-09	2.73038e-08	STM14_3990:50S ribosomal protein L27;STM14_3991:50S ribosomal protein L21;
O3411099	155.328	-4.0505	0.518111	7.81782	5.37439e-15	3.7113e-13	STM14_4013:hypothetical protein;
O3411101	5.29	2.53642	0.982492	-2.58162	0.00983378	0.0380034	STM14_4017:putative FeS oxidoreductase;
O3411104	8.29371	2.08561	0.764732	-2.72724	0.0063866	0.0277823	STM14_4030:N-acetylneuraminate lyase;
O1221089	519.719	2.10491	0.290947	-7.23469	4.66584e-13	1.95438e-11	STM14_4032:ClpXP protease specificity-enhancing factor;STM14_4033:stringent starvation protein A;
O1221090	123.983	1.39584	0.500079	-2.79124	0.00525058	0.0236322	STM14_4036:30S ribosomal protein S9;STM14_4037:50S ribosomal protein L13;
O3411108	42.3531	1.90214	0.429495	-4.42878	9.47691e-06	0.000105177	STM14_4038:putative ATPase;
O3411110	3.86541	-4.09141	1.46632	2.79025	0.00526668	0.0236636	STM14_4055:putative outer membrane protein;
O1221096	15.1184	-1.94267	0.745579	2.60559	0.00917173	0.0361991	STM14_4058:p-hydroxybenzoic acid efflux subunit AaeB;STM14_4059:p-hydroxybenzoic acid efflux subunit AaeA;STM14_4060:hypothetical protein;
O1221099	139.372	1.07184	0.313197	-3.42226	0.000621023	0.00395293	STM14_4075:hypothetical protein;STM14_4076:acetyl-CoA carboxylase biotin carboxyl carrier protein subunit;STM14_4077:acetyl-CoA carboxylase biotin carboxylase subunit;
O1221100	210.456	-1.32858	0.298073	4.45724	8.30219e-06	9.25355e-05	STM14_4078:hypothetical protein;STM14_4079:sodium/panthothenate symporter;STM14_4080:50S ribosomal protein L11 methyltransferase;
O3411122	34.2823	1.66675	0.431354	-3.864	0.000111545	0.000877822	STM14_4085:hypothetical protein;
O3411701	1192.5	2.94186	0.599973	-4.90333	9.42273e-07	1.26138e-05	STM14_4099:23S ribosomal RNA;
O1221107	536.59	3.23397	0.425536	-7.59975	2.96694e-14	1.7919e-12	STM14_4117:50S ribosomal protein L17;STM14_4118:DNA-directed RNA polymerase subunit alpha;STM14_4119:30S ribosomal protein S4;STM14_4120:30S ribosomal protein S11;STM14_4121:30S ribosomal protein S13;
O1221108	4727.42	-1.81486	0.351531	5.16274	2.43357e-07	3.85365e-06	STM14_4122:50S ribosomal protein L36;STM14_4123:preprotein translocase subunit SecY;STM14_4124:50S ribosomal protein L15;STM14_4125:50S ribosomal protein L30;STM14_4126:30S ribosomal protein S5;STM14_4127:50S ribosomal protein L18;STM14_4128:50S ribosomal protein L6;STM14_4129:30S ribosomal protein S8;STM14_4130:30S ribosomal protein S14;STM14_4131:50S ribosomal protein L5;STM14_4132:50S ribosoma…
O3411133	4067.5	-1.02782	0.252441	4.07153	4.67052e-05	0.000419701	STM14_4146:bacterioferritin, iron storage and detoxification protein;
O1221110	158.716	-2.24597	0.326793	6.87277	6.29687e-12	2.09653e-10	STM14_4147:bacterioferritin-associated ferredoxin;STM14_4148:elongation factor Tu;STM14_4149:elongation factor Tu;STM14_4150:elongation factor G;STM14_4151:30S ribosomal protein S7;STM14_4152:30S ribosomal protein S12;
O3411134	1284.13	1.48457	0.34135	-4.34911	1.36693e-05	0.000148532	STM14_4157:FKBP-type peptidyl-prolyl cis-trans isomerase;
O3411138	154.07	-1.46262	0.349537	4.18444	2.8587e-05	0.000273753	STM14_4164:putative ABC transporter ATP-binding protein;
O3411142	889.614	1.37543	0.495251	-2.77724	0.00548221	0.024379	STM14_4179:peptidyl-prolyl cis-trans isomerase A;
O1221117	32.639	3.33207	0.481338	-6.92252	4.43687e-12	1.53634e-10	STM14_4183:nitrite reductase large subunit;STM14_4184:nitrite reductase small subunit;
O1221118	24.4943	-1.86024	0.687233	2.70685	0.00679242	0.0291088	STM14_4186:nitrite transporter NirC;STM14_4187:siroheme synthase;
O1221120	27.0426	-1.66992	0.539731	3.09399	0.00197485	0.0104454	STM14_4192:hypothetical protein;STM14_4193:tryptophanyl-tRNA synthetase;STM14_4194:phosphoglycolate phosphatase;STM14_4195:ribulose-phosphate 3-epimerase;STM14_4196:DNA adenine methylase;
O1221130	123.927	4.25555	0.475163	-8.95598	3.36721e-19	4.16411e-17	STM14_4237:RNA 3'-terminal-phosphate cyclase;STM14_4238:putative cytoplasmic protein;
O3411163	168.832	1.57615	0.604514	-2.6073	0.00912598	0.036149	STM14_4246:glycerol-3-phosphate dehydrogenase;
O3411164	127.95	-3.21584	0.429179	7.49301	6.7314e-14	3.49629e-12	STM14_4249:glycerol dehydrogenase;
O1221135	1152.11	-1.41151	0.256904	5.4943	3.9226e-08	7.03749e-07	STM14_4254:glycogen phosphorylase;STM14_4255:glycogen synthase;STM14_4256:glucose-1-phosphate adenylyltransferase;STM14_4257:glycogen debranching protein;STM14_4258:glycogen branching protein;
O1221136	473.986	1.46865	0.301944	-4.86399	1.15044e-06	1.49384e-05	STM14_4259:hypothetical protein;STM14_4260:aspartate-semialdehyde dehydrogenase;
O1221138	11.9257	1.64639	0.664354	-2.47818	0.0132054	0.0485756	STM14_4264:low affinity gluconate transporter;STM14_4265:gluconate kinase;
O3411168	152.536	1.55073	0.267454	-5.79811	6.70653e-09	1.37141e-07	STM14_4268:putative dehydrogenase;
O1221141	3.86692	-4.09188	1.46501	2.79308	0.00522082	0.023539	STM14_4274:putative inner membrane protein;STM14_4275:putative phosphotriesterase;
O3411172	55.2383	1.43038	0.515242	-2.77613	0.00550105	0.0244209	STM14_4294:high-affinity branched-chain amino acid transporter;
O1221147	33.9611	1.58172	0.421753	-3.75034	0.000176592	0.0013293	STM14_4297:cell division protein FtsX;STM14_4298:cell division protein FtsE;STM14_4299:cell division protein FtsY;
O3411175	14.2638	2.56012	0.793616	-3.2259	0.00125579	0.0071052	STM14_4302:putative inner membrane protein;
O3411177	376.091	1.38939	0.452869	-3.06797	0.0021552	0.0112844	STM14_4304:zinc/cadmium/mercury/lead-transporting ATPase;
O3411179	267.59	1.36005	0.278992	-4.87488	1.08874e-06	1.42801e-05	STM14_4306:cell developmental protein SirA;
O1221151	94.713	-1.64095	0.420155	3.90559	9.39961e-05	0.000767635	STM14_4313:putative ABC transport protein;STM14_4314:putative ABC-type multidrug transport system ATPase component;STM14_4315:hypothetical protein;
O3411182	8.25809	4.46622	1.05595	-4.22956	2.34144e-05	0.000232978	STM14_4316:hypothetical protein;
O3411185	5229.31	-1.32507	0.269257	4.92121	8.60116e-07	1.16949e-05	STM14_4319:universal stress protein UspB;
O3411205	70.4314	-1.07221	0.397265	2.69898	0.00695524	0.0297085	STM14_4348:ketodeoxygluconokinase;
O3411206	146.881	2.22104	0.395173	-5.62042	1.90498e-08	3.61111e-07	STM14_4349:putative Zn-dependent peptidase;
O3411207	199.175	-2.24175	0.336302	6.66587	2.63096e-11	7.9449e-10	STM14_4350:hypothetical protein;
O3411211	1060.38	1.37014	0.230196	-5.95204	2.64818e-09	5.77926e-08	STM14_4382:phosphoethanolamine transferase;
O3411215	56.1124	-1.66973	0.498587	3.34892	0.000811268	0.00496902	STM14_4389:putative lipase;
O3411223	525.082	1.39891	0.352209	-3.97181	7.13284e-05	0.000607344	STM14_4399:major cold shock protein;
O3411237	292.74	-2.70275	0.390633	6.91888	4.55215e-12	1.55552e-10	STM14_4438:aldehyde dehydrogenase B;
O3411238	90.5232	-1.30444	0.370964	3.51636	0.000437509	0.00289112	STM14_4439:putative transcriptional regulator;
O3411239	319.603	-1.32376	0.277808	4.76503	1.8883e-06	2.351e-05	STM14_4442:glutathione S-transferase;
O1221175	48.2877	2.66818	0.493414	-5.4076	6.38764e-08	1.11334e-06	STM14_4451:L-lactate permease;STM14_4452:DNA-binding transcriptional repressor LldR;STM14_4453:L-lactate dehydrogenase;STM14_4454:putative tRNA/rRNA methyltransferase YibK;
O1221177	43.1586	1.80437	0.442701	-4.07581	4.58537e-05	0.000416043	STM14_4459:serine acetyltransferase;STM14_4460:NAD(P)H-dependent glycerol-3-phosphate dehydrogenase;STM14_4461:preprotein translocase subunit SecB;STM14_4462:glutaredoxin 3;STM14_4463:putative rhodanese-like sulfurtransferase;
O3411247	264.551	1.80756	0.319816	-5.65186	1.58718e-08	3.05326e-07	STM14_4476:lipopolysaccharide core biosynthesis protein;
O1221182	349.169	1.94243	0.259112	-7.49648	6.55536e-14	3.47434e-12	STM14_4481:putative inner membrane protein;STM14_4482:lipopolysaccharide core biosynthetic protein;STM14_4483:glucosyltransferase I;STM14_4484:lipopolysaccharide core biosynthesis protein;
O1221183	165.896	2.36756	0.331682	-7.13805	9.46617e-13	3.63447e-11	STM14_4486:3-deoxy-D-manno-octulosonic-acid transferase;STM14_4487:phosphopantetheine adenylyltransferase;
O3411249	230.296	-1.71644	0.466486	3.67951	0.000233679	0.00168574	STM14_4488:formamidopyrimidine-DNA glycosylase;
O1221184	1503.83	2.71126	0.357384	-7.58641	3.28882e-14	1.85675e-12	STM14_4489:50S ribosomal protein L33;STM14_4490:50S ribosomal protein L28;
O1221186	194.004	2.88316	0.379548	-7.59632	3.04674e-14	1.79827e-12	STM14_4495:orotate phosphoribosyltransferase;STM14_4496:ribonuclease PH;
O3411267	165.302	-1.35058	0.408102	3.30941	0.000934915	0.00559441	STM14_4534:putative inner membrane protein;
O1221201	46.5267	-3.19473	0.613018	5.21149	1.87334e-07	3.00312e-06	STM14_4562:hypothetical protein;STM14_4563:phosphotransferase system mannitol/fructose-specific IIA component;STM14_4564:putative regulatory protein;
O1221202	2.94846	3.527	1.41932	-2.485	0.0129553	0.0477911	STM14_4567:hypothetical protein;STM14_4568:sugar phosphate antiporter;
O1221204	297.51	-1.84	0.370036	4.97248	6.6102e-07	9.21736e-06	STM14_4572:putative cytoplasmic protein;STM14_4573:putative L-fucose permease;STM14_4574:putative sugar kinase;
O3411286	31.6278	1.45525	0.519383	-2.80188	0.0050806	0.0230781	STM14_4585:integral membrane protein;
O3411292	120.472	-2.30889	0.531147	4.34698	1.38022e-05	0.000149351	STM14_4597:hypothetical protein;
O1221208	1003.53	-2.76185	0.404057	6.83529	8.18401e-12	2.69036e-10	STM14_4599:heat shock chaperone IbpB;STM14_4600:heat shock protein IbpA;
O1221210	15.0475	-2.37101	0.758928	3.12415	0.00178319	0.00961528	STM14_4613:chaperone protein TorD;STM14_4614:trimethylamine N-oxide reductase subunit;STM14_4615:trimethylamine N-oxide reductase cytochrome c-like subunit;
O3411299	42.9205	-1.19519	0.416073	2.87254	0.00407183	0.0194386	STM14_4618:hybrid sensory histidine kinase TorS;
O3411301	588.189	-1.30933	0.325508	4.02242	5.76028e-05	0.000504015	STM14_4627:putative transcriptional regulator;
O1221214	45.4403	-1.79124	0.584767	3.06316	0.00219014	0.0114213	STM14_4628:DNA gyrase subunit B;STM14_4629:recombination protein F;
O1221215	243.502	-1.40654	0.313289	4.4896	7.13568e-06	8.0923e-05	STM14_4631:DNA polymerase III subunit beta;STM14_4632:chromosomal replication initiation protein;
O1221219	46.0995	1.70076	0.45231	-3.76018	0.000169792	0.00128932	STM14_4644:putative cytoplasmic protein;STM14_4645:putative oxidoreductase;
O3411307	86.5157	1.77251	0.426054	-4.1603	3.17833e-05	0.000302349	STM14_4652:phosphate transporter subunit;
O1221222	127.477	2.56567	0.336364	-7.62765	2.3907e-14	1.51431e-12	STM14_4666:F0F1 ATP synthase subunit C;STM14_4667:F0F1 ATP synthase subunit A;STM14_4668:F0F1 ATP synthase subunit I;
O3411316	146.525	1.78879	0.415374	-4.30646	1.65891e-05	0.000175844	STM14_4672:flavodoxin;
O3411318	1441.09	-2.16995	0.388922	5.57941	2.41334e-08	4.44499e-07	STM14_4674:asparagine synthetase AsnA;
O1221224	78.5035	1.33667	0.399091	-3.3493	0.00081017	0.00496902	STM14_4675:hypothetical protein;STM14_4676:regulatory ATPase RavA;
O1221225	217.048	3.30631	0.398507	-8.29675	1.07001e-16	9.5821e-15	STM14_4678:D-ribose pyranase;STM14_4679:D-ribose transporter ATP-binding protein;STM14_4680:ribose ABC transporter permease;STM14_4681:D-ribose transporter subunit RbsB;
O3411706	203.874	1.42194	0.550416	-2.58338	0.00978361	0.0379224	STM14_4687:Glu tRNA;
O3411707	1121.15	3.45084	0.60576	-5.69671	1.22143e-08	2.40308e-07	STM14_4688:23S ribosomal RNA;
O3411323	142.948	-1.86898	0.449561	4.15734	3.21981e-05	0.000305177	STM14_4705:DNA-binding transcriptional regulator IlvY;
O3411324	76.0548	4.92305	0.527343	-9.33559	1.00429e-20	1.6301e-18	STM14_4706:ketol-acid reductoisomerase;
O3411329	1671.69	1.00799	0.298077	-3.38163	0.00072057	0.0045201	STM14_4715:transcription termination factor Rho;
O3411330	61.9203	1.04363	0.384254	-2.716	0.00660761	0.0284577	STM14_4728:putative transport protein YifK;
O3411715	6233.06	6.47392	0.543692	-11.9073	1.08382e-32	5.62937e-30	STM14_4732:Pro tRNA;
O3411331	64.8865	1.19484	0.372856	-3.20457	0.00135263	0.00755435	STM14_4733:hypothetical protein;
O3411339	1603.23	1.65228	0.323247	-5.1115	3.19607e-07	4.88246e-06	STM14_4754:magnesium/nickel/cobalt transporter CorA;
O3411340	91.8317	1.58915	0.372516	-4.266	1.9901e-05	0.000206732	STM14_4763:homoserine/homoserine lactone efflux protein;
O3411341	30.8826	2.28346	0.544272	-4.19544	2.72338e-05	0.000263904	STM14_4767:metE/metH regulator;
O3411362	262978	-1.41998	0.226706	6.26352	3.76387e-10	9.77477e-09	STM14_4814:hypothetical protein;
O3411365	379.014	2.14974	0.558358	-3.85011	0.000118064	0.000926323	STM14_4822:GTP-binding protein;
O1221255	1447.19	-1.34234	0.251829	5.33036	9.80177e-08	1.62135e-06	STM14_4849:formate dehydrogenase accessory protein FdhE;STM14_4850:formate dehydrogenase-O subunit gamma;STM14_4851:formate dehydrogenase-O beta subunit;STM14_4852:formate dehydrogenase alpha subunit;
O3411371	53.7021	1.15682	0.429639	-2.69253	0.00709117	0.0301404	STM14_4861:hypothetical protein;
O3411375	37.882	-1.61231	0.553404	2.91343	0.00357477	0.0174505	STM14_4870:transcriptional activator RhaR;
O3411378	265.199	2.18152	0.308196	-7.07836	1.45868e-12	5.41171e-11	STM14_4878:superoxide dismutase;
O3411379	616.34	1.66987	0.514713	-3.24429	0.00117746	0.00673194	STM14_4883:repressor CpxP;
O1221264	174.538	4.37815	0.473246	-9.25133	2.21711e-20	3.1988e-18	STM14_4887:sulfate transporter subunit;STM14_4888:CDP-diacylglycerol pyrophosphatase;
O1221266	139.155	1.33979	0.313467	-4.27411	1.91902e-05	0.000200149	STM14_4893:hypothetical protein;STM14_4894:putative cytoplasmic protein;
O3411383	310.297	-1.18093	0.369539	3.19569	0.00139497	0.00775749	STM14_4897:putative transcriptional repressor;
O3411386	93.2675	1.28211	0.48906	-2.62158	0.0087523	0.0350922	STM14_4907:hypothetical protein;
O3411387	158.867	-1.11851	0.396235	2.82284	0.00475996	0.022035	STM14_4908:putative inner membrane protein;
O1221272	854.521	-1.02115	0.249396	4.0945	4.23074e-05	0.000385517	STM14_4916:hypothetical protein;STM14_4917:ribonuclease activity regulator protein RraA;
O3411388	42.4149	2.41956	0.433569	-5.58058	2.39717e-08	4.44499e-07	STM14_4918:1,4-dihydroxy-2-naphthoate octaprenyltransferase;
O3411389	374.701	-2.20967	0.29968	7.37341	1.66316e-13	7.44692e-12	STM14_4924:50S ribosomal protein L31;
O3411393	558.874	-1.00021	0.359335	2.78351	0.00537737	0.0241192	STM14_4932:putative cytoplasmic protein;
O3411397	1158.34	1.88686	0.48807	-3.86596	0.000110655	0.000877822	STM14_4936:hydroperoxidase;katG
O3411398	271.162	-2.03165	0.471607	4.30793	1.6479e-05	0.000175393	STM14_4937:hypothetical protein;
O1221277	221.589	-1.8441	0.411753	4.47867	7.51085e-06	8.44402e-05	STM14_4939:glycerol dehydrogenase;STM14_4940:fructose-6-phosphate aldolase;STM14_4941:PEP-protein phosphotransferase;
O3411402	2719.95	-1.78422	0.290277	6.14662	7.91538e-10	1.93927e-08	STM14_4952:hypothetical protein;
O1221281	663.259	2.13859	0.32668	-6.54643	5.893e-11	1.66349e-09	STM14_4956:N-acetyl-gamma-glutamyl-phosphate reductase;STM14_4957:acetylglutamate kinase;
O1221286	1452.01	5.32983	0.42267	-12.6099	1.86224e-36	1.20906e-33	STM14_4982:elongation factor Tu;STM14_4983:hypothetical protein;
O1221288	376.232	2.89596	0.481349	-6.01635	1.78394e-09	3.99388e-08	STM14_4986:50S ribosomal protein L11;STM14_4987:50S ribosomal protein L1;
O3411414	5.10843	2.54465	0.927821	-2.7426	0.00609542	0.0267395	STM14_4997:hypothetical protein;
O1221294	10127.2	1.5166	0.296041	-5.12293	3.00817e-07	4.62262e-06	STM14_5011:transcriptional regulator HU subunit alpha;STM14_5012:putative inner membrane protein;
O3411417	2768.91	-6.53437	0.306359	21.3291	6.09781e-101	1.5836e-97	STM14_5013:zinc resistance protein;
O1221295	26.9521	1.45533	0.541321	-2.68848	0.00717779	0.0303595	STM14_5014:sensor protein ZraS;STM14_5015:transcriptional regulatory protein ZraR;
O3411732	197.078	1.47811	0.583759	-2.53206	0.0113393	0.0429274	STM14_5022:Glu tRNA;
O3411733	1122.56	3.54921	0.582254	-6.09564	1.09003e-09	2.59707e-08	STM14_5023:23S ribosomal RNA;
O3411424	207.719	1.19782	0.45055	-2.65858	0.00784716	0.0325566	STM14_5028:homoserine O-succinyltransferase;
O3411437	180.175	1.48502	0.298902	-4.96826	6.75558e-07	9.33204e-06	STM14_5074:aspartate kinase III;
O3411442	162.792	3.45275	0.41224	-8.37558	5.49509e-17	5.0967e-15	STM14_5086:maltose/maltodextrin transporter ATP-binding protein;
O3411448	38.6259	-2.40114	0.610764	3.93138	8.44601e-05	0.000698544	STM14_5102:phage shock protein G;
O1221311	28.4376	2.58833	0.479937	-5.39306	6.9268e-08	1.18348e-06	STM14_5104:replicative DNA helicase;STM14_5105:alanine racemase;STM14_5106:aromatic amino acid aminotransferase;
O1221312	273.064	-1.3637	0.330113	4.13103	3.61143e-05	0.00033737	STM14_5108:putative cytoplasmic protein;STM14_5109:putative cytoplasmic protein;
O3411457	15.5369	1.76063	0.670528	-2.62574	0.00864618	0.0347587	STM14_5126:diguanylate cyclase;
O3411464	11.2208	1.91824	0.685515	-2.79825	0.00513811	0.0232874	STM14_5133:hypothetical protein;
O3411468	60.3182	-1.00026	0.392724	2.54699	0.0108658	0.0414148	STM14_5141:acetyl-CoA synthetase;
O3411476	15.3834	-6.08532	1.32964	4.57667	4.72426e-06	5.60224e-05	STM14_5161:proline/glycine betaine transporter;
O3411477	1757.58	-1.21747	0.301765	4.03451	5.47153e-05	0.000484968	STM14_5162:hypothetical protein;
O3411483	46.8053	-1.64762	0.503559	3.27195	0.00106807	0.00627551	STM14_5175:putative cytoplasmic protein;
O1221326	154.075	-1.38804	0.425533	3.26189	0.00110673	0.00645884	STM14_5178:putative anaerobic dimethylsulfoxide reductase subunit A;STM14_5179:putative anaerobic dimethylsulfoxide reductase subunit B;STM14_5180:putative anaerobic dimethylsulfoxide reductase subunit C;STM14_5181:putative anaerobic dehydrogenase component;
O3411492	3.98241	-4.13489	1.47397	2.80528	0.00502722	0.0230002	STM14_5190:putative cytoplasmic protein;
O3411496	1566.9	8.97234	0.588046	-15.2579	1.45893e-52	1.89442e-49	STM14_5196:hypothetical protein;
O3411501	1560.74	-1.12269	0.306092	3.66781	0.000244632	0.00174058	STM14_5209:putative outer membrane lipoprotein;
O1221331	260.322	1.44556	0.280908	-5.14604	2.6605e-07	4.16223e-06	STM14_5212:hypothetical protein;STM14_5213:putative aminomutase;
O1221333	1876.89	-1.33387	0.267925	4.97852	6.40713e-07	9.04311e-06	STM14_5220:fumarate reductase subunit D;STM14_5221:fumarate reductase subunit C;STM14_5222:fumarate reductase iron-sulfur subunit;STM14_5223:fumarate reductase flavoprotein subunit;
O1221335	179.311	1.28435	0.427744	-3.00261	0.00267677	0.0134796	STM14_5228:hypothetical protein;STM14_5229:phosphatidylserine decarboxylase;
O3411518	48.8352	-3.24557	0.608738	5.33165	9.73261e-08	1.62023e-06	STM14_5264:putative L-ascorbate 6-phosphate lactonase;
O1221344	137.437	1.58604	0.519777	-3.05139	0.00227786	0.0118076	STM14_5275:30S ribosomal protein S6;STM14_5276:primosomal replication protein N;STM14_5277:30S ribosomal protein S18;STM14_5278:50S ribosomal protein L9;
O3411522	864.646	-1.71677	0.274216	6.26062	3.83445e-10	9.85948e-09	STM14_5280:putative cell envelope opacity-associated protein A;
O3411524	2965.68	-1.15788	0.21869	5.29462	1.19266e-07	1.9488e-06	STM14_5282:D-alanine/D-serine/glycine permease;
O3411532	71.6035	1.39277	0.434874	-3.2027	0.00136145	0.00758733	STM14_5301:inorganic pyrophosphatase;
O3411533	281.727	1.58032	0.249994	-6.32143	2.5916e-10	6.86773e-09	STM14_5304:UDP-N-acetylmuramate/L-alanyl-gamma-D-glutamyl- meso-diaminopimelate ligase;
O3411534	14.1049	1.5796	0.591668	-2.66975	0.00759075	0.0316424	STM14_5305:hypothetical protein;
O1221352	52.0648	1.40538	0.382975	-3.66965	0.000242885	0.00173289	STM14_5314:putative DNA-binding protein;STM14_5315:hypothetical protein;
O1221357	91.9417	-1.16286	0.387306	3.00244	0.00267827	0.0134796	STM14_5331:putative cytoplasmic protein;STM14_5332:putative cytoplasmic protein;STM14_5333:putative cytoplasmic protein;STM14_5334:putative inner membrane protein;STM14_5335:putative inner membrane protein;STM14_5336:dihydroorotase;STM14_5337:putative selenocysteine synthase;STM14_5338:4-hydroxy-2-oxoglutarate aldolase;STM14_5339:phosphotransferase system mannitol/fructose-specific IIA component;
O1221361	12.6039	2.19908	0.660283	-3.33051	0.000866864	0.00527247	STM14_5357:putative arginine repressor;STM14_5358:ornithine carbamoyltransferase;STM14_5359:hypothetical protein;STM14_5360:carbamate kinase;STM14_5361:arginine deiminase;
O3411555	43.8811	-1.7758	0.474173	3.74505	0.000180357	0.00134982	STM14_5363:putative cytoplasmic protein;
O3411556	375.971	2.40243	0.504221	-4.76463	1.89203e-06	2.351e-05	STM14_5364:ornithine carbamoyltransferase subunit I;
O1221366	10.7196	-2.34328	0.907003	2.58354	0.00977914	0.0379224	STM14_5377:L-idonate regulator;STM14_5378:L-idonate transport protein;STM14_5379:gluconate 5-dehydrogenase;STM14_5380:L-idonate 5-dehydrogenase;
O3411564	101.569	5.5485	0.762439	-7.27729	3.4058e-13	1.47414e-11	STM14_5385:putative integrase;
O3411566	247.154	-1.08077	0.409199	2.64119	0.00826163	0.0337885	STM14_5387:putative restriction endonuclease;
O1221368	757.59	-1.33116	0.451196	2.95029	0.00317479	0.0157346	STM14_5400:putative SAM-dependent methyltransferase;STM14_5401:hypothetical protein;
O3411576	162.548	3.36686	0.540113	-6.23362	4.55792e-10	1.16048e-08	STM14_5408:hypothetical protein;
O3411579	239	-1.09716	0.344817	3.18186	0.00146332	0.00808564	STM14_5411:DNA-binding transcriptional repressor UxuR;
O3411580	2534.53	-1.07419	0.354126	3.03335	0.00241851	0.0124148	STM14_5412:tryptophanyl-tRNA synthetase II;
O3411585	719.993	-1.253	0.296111	4.23154	2.32102e-05	0.000231834	STM14_5424:putative inner membrane protein;
O1221373	9.22319	-2.77168	1.01837	2.7217	0.00649477	0.0281115	STM14_5441:putative inner membrane protein;STM14_5442:putative cytoplasmic protein;
O1221374	51.3838	1.93646	0.425021	-4.55615	5.20998e-06	6.12232e-05	STM14_5443:putative GTP-binding protein YjiA;STM14_5444:putative cytoplasmic protein;STM14_5445:putative carbon starvation protein;
O1221378	64.8973	1.00424	0.324295	-3.09667	0.00195705	0.0103724	STM14_5460:hypothetical protein;STM14_5461:hypothetical protein;
O3411607	24.3934	1.80684	0.547604	-3.29954	0.000968435	0.00576841	STM14_5469:putative inner membrane protein;
O3411608	15.0142	3.46306	0.841538	-4.11516	3.86918e-05	0.000358866	STM14_5473:16S ribosomal RNA m2G1207 methyltransferase;
O1221380	22.97	-2.33755	0.649805	3.59731	0.000321527	0.00221487	STM14_5474:hypothetical protein;STM14_5475:DNA polymerase III subunit psi;STM14_5476:ribosomal-protein-alanine N-acetyltransferase;STM14_5477:nucleotidase;
O3411609	70.2063	1.91349	0.381335	-5.01786	5.22499e-07	7.51691e-06	STM14_5478:peptide chain release factor 3;
O1221383	198.28	2.3494	0.52378	-4.48548	7.27499e-06	8.21441e-05	STM14_5487:deoxyribose-phosphate aldolase;STM14_5488:thymidine phosphorylase;STM14_5489:phosphopentomutase;
O3411618	417.824	1.37251	0.366055	-3.74945	0.00017722	0.00133017	STM14_5506:phosphoglycerate mutase;
O973039	727.828	1.1897	0.272831	-4.36057	1.29726e-05	0.000142753	STM14_5529:DNA replication;STM14_5530:replication of plasmid;STM14_5531:DNA replication;
O3409571	60.2454	-1.78937	0.421202	4.24824	2.15452e-05	0.000218112	STM14_5548:putative cytoplasmic protein;
O973043	272.969	-1.79348	0.557461	3.21722	0.00129438	0.00730764	STM14_5550:toxin addiction system: antidote;STM14_5551:toxin addiction system: toxin;STM14_5552:putative cytoplasmic protein;STM14_5553:putative cytoplasmic protein;STM14_5554:resolvase;STM14_5555:diguanylate cyclase;
O973044	309.826	-1.09398	0.407479	2.68476	0.00725814	0.0305996	STM14_5566:putative phosphoribulokinase / uridine kinase family;STM14_5567:putative integrase protein;STM14_5568:putative resolvase;
O3409584	33.3245	-1.46359	0.561578	2.6062	0.00915527	0.0361891	STM14_5570:putative cytoplasmic protein;
O3409587	3.46688	-3.93683	1.54317	2.55114	0.0107371	0.0410064	STM14_5573:putative cytoplasmic protein;
O973045	75.0586	-1.75336	0.455612	3.84837	0.000118906	0.000930119	STM14_5575:plasmid partition protein A;STM14_5576:plasmid partition protein B;
O3409593	122.631	-1.38202	0.408457	3.38352	0.000715636	0.00450001	STM14_5592:putative transglycosylase;
O1220501	81.5387	-1.60374	0.411782	3.89464	9.83446e-05	0.00079317	STM14_927:putative cytoplasmic protein;STM14_928:hypothetical protein;
O3409933	519.044	1.38727	0.279034	-4.97169	6.63707e-07	9.21736e-06	STM14_929:putative cytoplasmic protein;
O1220502	282.399	1.16818	0.38579	-3.02803	0.00246152	0.0125591	STM14_930:molybdenum cofactor biosynthesis protein A;STM14_931:molybdopterin biosynthetic protein B;STM14_932:molybdenum cofactor biosynthesis protein C;STM14_933:molybdopterin synthase small subunit;STM14_934:molybdopterin synthase large subunit;STM14_935:putative permease;
O3409938	21.5072	1.89178	0.610642	-3.09802	0.00194815	0.0103463	STM14_955:hypothetical protein;
O1220509	142.146	-1.49656	0.364431	4.10657	4.01586e-05	0.000368522	STM14_962:glutamine ABC transporter ATP-binding protein;STM14_963:glutamine ABC transporter permease;
O3409943	311.491	2.14811	0.423555	-5.07161	3.94467e-07	5.92156e-06	STM14_966:DNA starvation/stationary phase protection protein Dps;
O3409944	5383.27	-1.16848	0.24386	4.79162	1.65444e-06	2.07564e-05	STM14_971:outer membrane protein X;
O3409947	5486.94	-1.54031	0.267822	5.75123	8.85988e-09	1.79759e-07	STM14_974:hypothetical protein;
O3409948	67.9799	2.14656	0.378467	-5.67172	1.41368e-08	2.76039e-07	STM14_977:hypothetical protein;
O1220515	71.5307	1.18332	0.439172	-2.69443	0.00705083	0.0300181	STM14_986:hypothetical protein;STM14_987:molybdopterin biosynthesis protein MoeB;STM14_988:molybdopterin biosynthesis protein MoeA;
O3409954	1271.1	-2.97784	0.33595	8.86391	7.72552e-19	8.72312e-17	STM14_998:biofilm formation regulatory protein BssR;

## Sheet: Min_low_count
Operon_id	baseMean	log2FoldChange	lfcSE	stat	pvalue	padj	Gene in operon and description
O1220326	41.8492	1.55307	0.404414	-3.84029	0.000122889	0.000955273	STM14_0010:hypothetical protein;STM14_0011:hypothetical protein;
O1220327	990.792	-3.04784	0.408562	7.45993	8.65714e-14	4.242e-12	STM14_0013:molecular chaperone DnaK;STM14_0014:chaperone protein DnaJ;
O3409608	13.0616	-3.46356	0.98523	3.51549	0.000438944	0.00289325	STM14_0025:putative cytoplasmic protein;
O3409620	310.674	3.24435	0.454646	-7.136	9.60859e-13	3.63447e-11	STM14_0052:30S ribosomal protein S20;
O1220334	85.2036	-1.04164	0.368493	2.82676	0.00470222	0.0218066	STM14_0053:putative cytoplasmic protein;STM14_0054:bifunctional riboflavin kinase/FMN adenylyltransferase;STM14_0055:isoleucyl-tRNA synthetase;STM14_0056:lipoprotein signal peptidase;
O1220340	3020.82	2.08815	0.275087	-7.59085	3.1782e-14	1.83417e-12	STM14_0077:carbamoyl phosphate synthase small subunit;STM14_0078:carbamoyl phosphate synthase large subunit;
O3409636	407.439	2.17786	0.315883	-6.89452	5.40481e-12	1.82289e-10	STM14_0106:dihydrofolate reductase;
O1220347	26.7416	-2.50034	0.624502	4.00373	6.23503e-05	0.000536171	STM14_0121:L-arabinose isomerase;STM14_0122:ribulokinase;
O3409643	167.867	1.70262	0.437337	-3.89315	9.89517e-05	0.000794816	STM14_0124:hypothetical protein;
O3409647	23.1971	1.36894	0.502287	-2.72542	0.006422	0.0278429	STM14_0138:leucine transcriptional activator;
O3409648	10.2736	-2.27313	0.908507	2.50205	0.0123477	0.0461838	STM14_0141:hypothetical protein;
O3409655	462.136	1.23379	0.483618	-2.55116	0.0107365	0.0410064	STM14_0182:transcriptional regulator PdhR;
O1220358	33.9793	-1.77276	0.673179	2.63342	0.00845303	0.034193	STM14_0183:pyruvate dehydrogenase subunit E1;STM14_0184:dihydrolipoamide acetyltransferase;
O3409660	183.574	-1.31309	0.372189	3.528	0.000418705	0.00277392	STM14_0190:bifunctional aconitate hydratase 2/2-methylisocitrate dehydratase;
O3409662	4821.09	-1.79755	0.320154	5.61466	1.96947e-08	3.70631e-07	STM14_0192:hypothetical protein;
O3409667	419.35	1.91528	0.243771	-7.8569	3.93742e-15	2.84041e-13	STM14_0203:carbonic anhydrase;
O3409669	956.277	-1.16626	0.403521	2.89021	0.00384986	0.0186184	STM14_0211:putative PTS enzyme;
O3409670	60.8149	2.15813	0.389339	-5.54305	2.9724e-08	5.39812e-07	STM14_0212:putative xylanase/chitin deacetylase;
O1220364	52.7262	2.52529	0.486784	-5.18769	2.12914e-07	3.39226e-06	STM14_0217:2-amino-4-hydroxy-6-hydroxymethyldihydropteridine pyrophosphokinase;STM14_0218:poly(A) polymerase I;
O3409674	12.3305	6.40782	1.26529	-5.06433	4.09843e-07	6.08207e-06	STM14_0227:hypothetical protein;
O1220368	28.9413	2.65174	0.457021	-5.80222	6.54427e-09	1.34885e-07	STM14_0228:ferrichrome outer membrane transporter;STM14_0229:iron-hydroxamate transporter ATP-binding subunit;STM14_0230:iron-hydroxamate transporter substrate-binding subunit;STM14_0231:iron-hydroxamate transporter permease subunit;STM14_0232:hypothetical protein;
O3409680	174.545	1.21247	0.311477	-3.89264	9.91607e-05	0.000794816	STM14_0250:carbohydrate diacid transcriptional activator CdaR;
O3409684	86.8601	1.22554	0.402856	-3.04213	0.00234914	0.0121528	STM14_0259:uridylate kinase;
O3409688	825.025	1.35855	0.256815	-5.29	1.22315e-07	1.98533e-06	STM14_0284:prolyl-tRNA synthetase;
O1220380	52.818	3.32814	0.505365	-6.5856	4.53039e-11	1.33482e-09	STM14_0287:DL-methionine transporter substrate-binding subunit;STM14_0288:DL-methionine transporter permease;STM14_0289:DL-methionine transporter ATP-binding subunit;
O3409694	29.1792	-1.69024	0.585675	2.88598	0.00390198	0.0188005	STM14_0303:hypothetical protein;
O3409724	166.916	-1.12265	0.287662	3.90266	9.51394e-05	0.000774536	STM14_0368:hypothetical protein;
O1220392	235.028	2.63346	0.350269	-7.51838	5.54608e-14	3.00066e-12	STM14_0373:xanthine-guanine phosphoribosyltransferase;STM14_0374:fermentation/respiration switch protein;STM14_0375:DNA-binding transcriptional regulator Crl;
O3409738	13.712	1.83804	0.569524	-3.22733	0.00124949	0.00708501	STM14_0403:hypothetical protein;
O1220405	31.0566	-1.41717	0.528642	2.68078	0.00734499	0.0308157	STM14_0432:methylcitrate synthase;STM14_0433:2-methylcitrate dehydratase;STM14_0434:propionyl-CoA synthetase;
O3409756	347.799	-2.55444	0.356719	7.16092	8.01387e-13	3.20185e-11	STM14_0445:putative inner membrane protein;
O3409759	78.497	1.08225	0.325061	-3.32937	0.000870432	0.00527247	STM14_0448:D-alanyl-alanine synthetase A;
O3409763	3001.79	1.20001	0.237327	-5.05637	4.27316e-07	6.30533e-06	STM14_0452:hypothetical protein;
O3409765	1843.97	-1.15172	0.224062	5.1402	2.74451e-07	4.26367e-06	STM14_0454:hypothetical protein;
O1220408	727.93	1.67535	0.283878	-5.90166	3.59857e-09	7.72355e-08	STM14_0459:shikimate kinase;STM14_0460:hypothetical protein;
O1220411	16.1144	1.7472	0.616905	-2.83221	0.00462282	0.0215538	STM14_0467:exonuclease subunit SbcC;STM14_0468:exonuclease subunit SbcD;
O3409772	70.5694	-1.77831	0.380624	4.67208	2.98164e-06	3.61838e-05	STM14_0473:branched-chain amino acid transporter;
O3409775	581.817	1.56134	0.312246	-5.00036	5.72235e-07	8.16535e-06	STM14_0476:putative thiol-alkyl hydroperoxide reductase;
O3409780	516.715	-1.80778	0.362916	4.98126	6.31732e-07	8.96507e-06	STM14_0490:hypothetical protein;
O3409782	534.288	1.17633	0.27117	-4.33798	1.43796e-05	0.000154313	STM14_0514:nucleotide-binding protein;
O3409783	83.4992	1.3017	0.323624	-4.02227	5.76405e-05	0.000504015	STM14_0515:putative transport protein;
O1220425	424.084	2.75568	0.272465	-10.1139	4.79385e-24	9.57664e-22	STM14_0524:muropeptide transporter;STM14_0525:hypothetical protein;
O3409787	829.589	3.07565	0.426731	-7.20747	5.70018e-13	2.31302e-11	STM14_0529:trigger factor;
O1220427	46.3418	-1.54372	0.474289	3.2548	0.00113471	0.00656311	STM14_0539:queuosine biosynthesis protein QueC;STM14_0540:putative ABC transporter periplasmic binding protein;
O3409795	255.103	-3.11178	0.459392	6.77369	1.25535e-11	4.02487e-10	STM14_0541:putative hydrolase;
O3409796	148.215	6.24531	0.615518	-10.1464	3.43735e-24	7.43899e-22	STM14_0542:putative cysteine synthase/cystathionine beta-synthase;
O3409799	11.4852	2.83369	0.75468	-3.75482	0.000173463	0.00130954	STM14_0550:putative methyltransferase;
O3411635	4600.19	-2.13008	0.304646	6.99197	2.7106e-12	9.76956e-11	STM14_0551:4.5S ribosomal RNA;
O3409803	84.6904	1.63172	0.384455	-4.24423	2.19347e-05	0.000220793	STM14_0561:DNA-binding transcriptional repressor AcrR;
O3409806	57.1504	-1.17554	0.422703	2.78101	0.00541907	0.024181	STM14_0564:putative transposase;
O1220435	60.2023	1.73254	0.342096	-5.06447	4.09544e-07	6.08207e-06	STM14_0574:adenylate kinase;STM14_0575:hypothetical protein;STM14_0576:ferrochelatase;
O1220440	21.0834	1.60272	0.614751	-2.6071	0.00913121	0.036149	STM14_0600:ABC transporter ATP-binding protein;STM14_0601:ABC transporter ATP-binding protein;STM14_0602:putative ABC transporter permease;
O1220441	143.72	-2.42192	0.361328	6.70284	2.04412e-11	6.39588e-10	STM14_0603:tRNA 2-selenouridine synthase;STM14_0604:DNA-binding transcriptional activator AllS;
O1220447	72.6643	1.44155	0.402809	-3.57875	0.000345247	0.0023503	STM14_0623:phosphoribosylaminoimidazole carboxylase ATPase subunit;STM14_0624:phosphoribosylaminoimidazole carboxylase catalytic subunit;STM14_0625:UDP-2,3-diacylglucosamine hydrolase;STM14_0626:peptidyl-prolyl cis-trans isomerase B;
O3409825	115.184	2.03365	0.376207	-5.40567	6.45666e-08	1.11786e-06	STM14_0627:cysteinyl-tRNA synthetase;
O3411636	32.0849	1.65753	0.589549	-2.81153	0.00493071	0.0226638	STM14_0646:Arg tRNA;
O3411637	97.8011	2.89447	0.40435	-7.15834	8.16591e-13	3.21316e-11	STM14_0653:Xaa tRNA;
O3409838	603.902	5.40122	0.509403	-10.603	2.88452e-26	1.07016e-23	STM14_0658:pyridine nucleotide-disulfide oxidoreductase;
O1220452	122.432	3.10889	0.491601	-6.32401	2.54867e-10	6.8236e-09	STM14_0660:hypothetical protein;STM14_0661:putative inner membrane protein;
O1220457	13.4572	2.73488	0.702159	-3.89496	9.82149e-05	0.00079317	STM14_0684:enterobactin/ferric enterobactin esterase;STM14_0685:putative cytoplasmic protein;STM14_0686:enterobactin synthase subunit F;
O3409849	403.747	1.23	0.254932	-4.82483	1.40122e-06	1.79259e-05	STM14_0687:ferric enterobactin transport protein FepE;
O3409850	24.628	3.55274	0.590435	-6.01716	1.775e-09	3.99388e-08	STM14_0691:enterobactin exporter EntS;
O3409851	183.858	2.54645	0.351734	-7.23969	4.49708e-13	1.91458e-11	STM14_0692:iron-enterobactin transporter periplasmic binding protein;
O3409852	85.3482	-2.21818	0.412159	5.38186	7.37216e-08	1.25134e-06	STM14_0700:putative cytoplasmic protein;
O3409853	57.3478	2.20427	0.692519	-3.18297	0.00145773	0.00807192	STM14_0701:hypothetical protein;
O1220462	409.252	3.66765	0.313483	-11.6997	1.27952e-31	5.53819e-29	STM14_0707:alkyl hydroperoxide reductase subunit C;STM14_0708:alkyl hydroperoxide reductase F52a subunit;
O3409861	4849.41	-1.93388	0.25232	7.66441	1.79649e-14	1.19628e-12	STM14_0717:nucleoside diphosphate kinase regulator;
O3409867	33.7727	-1.77907	0.545918	3.25886	0.00111861	0.00649894	STM14_0732:cold shock protein CspE;
O3409876	34.9047	-1.40676	0.545142	2.58054	0.00986457	0.0380658	STM14_0751:alpha ribazole-5'-P phosphatase;
O3409877	50.9594	-2.11619	0.46364	4.56429	5.01188e-06	5.9163e-05	STM14_0752:threonine-phosphate decarboxylase;
O1220470	238.62	-6.97606	0.72868	9.57355	1.03293e-21	1.91609e-19	STM14_0757:putative hydrolase;STM14_0758:putative hydrolase;STM14_0759:2-keto-3-deoxygluconate permease;STM14_0760:putative sigma-54 dependent transcriptional regulator;
O3409878	9704.95	-2.31083	0.251387	9.1923	3.84542e-20	5.25608e-18	STM14_0761:hypothetical protein;
O1220472	619.706	-1.83076	0.306047	5.98197	2.20451e-09	4.89325e-08	STM14_0768:putative cytoplasmic protein;STM14_0769:ribonucleoside hydrolase 1;STM14_0770:glutamate/aspartate transporter;STM14_0771:glutamate/aspartate transporter;STM14_0772:glutamate/aspartate transporter;
O3409884	118.719	-2.86233	0.374778	7.63741	2.21642e-14	1.43901e-12	STM14_0782:2-octaprenyl-3-methyl-6-methoxy-1,4-benzoquinol hydroxylase;
O3409885	74.3955	-2.11365	0.491027	4.30455	1.67323e-05	0.000176642	STM14_0783:putative inner membrane protein;
O1220478	40.2279	3.16626	0.434761	-7.28276	3.2706e-13	1.43962e-11	STM14_0810:flavodoxin FldA;STM14_0811:LexA regulated protein;
O3409901	92.5911	1.44979	0.361876	-4.00631	6.16744e-05	0.000533895	STM14_0835:putative phage integrase;
O1220487	104.414	-2.52316	0.385047	6.55287	5.64421e-11	1.61077e-09	STM14_0855:alpha-ketoglutarate decarboxylase;STM14_0856:dihydrolipoamide acetyltransferase;
O1220490	1230.74	1.54935	0.261945	-5.9148	3.32271e-09	7.19089e-08	STM14_0866:acyl-CoA thioester hydrolase YbgC;STM14_0867:colicin uptake protein TolQ;STM14_0868:colicin uptake protein TolR;STM14_0869:cell envelope integrity inner membrane protein TolA;
O3411648	10.5257	7.18286	1.33972	-5.36147	8.25466e-08	1.39204e-06	STM14_0877:Lys tRNA;
O3411649	36.7629	2.31973	0.654321	-3.54525	0.000392239	0.00261862	STM14_0878:Lys tRNA;
O3409917	108.872	1.32142	0.3286	-4.02136	5.78634e-05	0.000504266	STM14_0887:transcriptional regulator;
O1220498	279.003	-1.2611	0.33348	3.78165	0.000155792	0.00119348	STM14_0913:imidazolonepropionase;STM14_0914:formimidoylglutamase;STM14_0915:histidine utilization repressor;
O3409965	22.17	1.39426	0.491197	-2.8385	0.00453262	0.0211713	STM14_1016:multidrug translocase;
O3409968	262.341	1.24388	0.291859	-4.26191	2.0269e-05	0.000209715	STM14_1021:hypothetical protein;
O3409970	4278.34	2.40254	0.303079	-7.9271	2.24316e-15	1.69856e-13	STM14_1023:glutaredoxin;grxA
O3409971	223.619	1.08549	0.27512	-3.94551	7.96293e-05	0.000662811	STM14_1027:putative cytoplasmic protein;
O1220522	33.873	1.62411	0.435466	-3.72959	0.000191788	0.00142307	STM14_1028:putrescine ABC transporter periplasmic substrate-binding protein;STM14_1029:putrescine ABC transporter ATP-binding protein;STM14_1030:putrescine ABC transporter membrane protein;STM14_1031:putrescine ABC transporter membrane protein;STM14_1032:putative inner membrane protein;
O1220525	76.192	1.16793	0.352154	-3.31653	0.000911424	0.00546644	STM14_1040:arginine transporter permease subunit ArtM;STM14_1041:arginine transporter permease subunit ArtQ;STM14_1042:arginine transport system;STM14_1043:arginine transporter ATP-binding subunit;
O1220527	307.814	-1.117	0.342305	3.26316	0.00110177	0.00644435	STM14_1047:putative nucleoside-diphosphate-sugar epimerase;STM14_1048:putative nucleoside-diphosphate-sugar epimerase;STM14_1049:L-threonine aldolase;STM14_1050:pyruvate dehydrogenase;
O3409975	83.6643	1.17448	0.428636	-2.74005	0.00614303	0.0269029	STM14_1054:putative inner membrane protein;
O3409978	106.159	1.72596	0.453439	-3.80638	0.000141015	0.00108348	STM14_1057:VirK-like protein;
O3409985	18651.9	1.80945	0.244389	-7.40397	1.32172e-13	6.12947e-12	STM14_1083:leucine-responsive transcriptional regulator;
O1220537	1124.77	-2.56543	0.319646	8.02586	1.00819e-15	8.18212e-14	STM14_1085:outer-membrane lipoprotein carrier protein;STM14_1086:recombination factor protein RarA;STM14_1087:hypothetical protein;STM14_1088:seryl-tRNA synthetase;
O3409988	211.861	2.29646	0.417995	-5.494	3.92929e-08	7.03749e-07	STM14_1094:MFS family transporter;
O3409992	684.839	-1.88527	0.272313	6.92315	4.41701e-12	1.53634e-10	STM14_1098:SopD-like protein;
O3409993	10.6246	3.73463	0.785701	-4.75325	2.00176e-06	2.47551e-05	STM14_1101:putative cytoplasmic protein;
O3409994	254.218	2.03414	0.256687	-7.92458	2.28917e-15	1.69856e-13	STM14_1105:phosphoserine aminotransferase;
O3409998	51.0154	-1.68452	0.418758	4.02265	5.75463e-05	0.000504015	STM14_1111:integration host factor subunit beta;
O1220542	25.2243	-1.96202	0.618071	3.17442	0.00150135	0.00826062	STM14_1112:hypothetical protein;STM14_1113:lipid transporter ATP-binding/permease;STM14_1114:tetraacyldisaccharide 4'-kinase;STM14_1115:putative cytoplasmic protein;STM14_1116:hypothetical protein;STM14_1117:3-deoxy-manno-octulosonate cytidylyltransferase;
O1220545	5213.01	2.39841	0.336133	-7.13532	9.65648e-13	3.63447e-11	STM14_1129:hypothetical protein;STM14_1130:outer membrane protein F;
O3410005	196.631	-1.65719	0.344139	4.81548	1.46845e-06	1.86027e-05	STM14_1132:asparaginyl-tRNA synthetase;
O3410009	296.718	1.08077	0.2518	-4.29217	1.76933e-05	0.000186031	STM14_1155:hypothetical protein;
O3410011	192.481	-1.29219	0.351949	3.67151	0.000241123	0.00172982	STM14_1163:hypothetical protein;
O3410016	70.1656	-1.31837	0.505323	2.60896	0.00908173	0.0361183	STM14_1184:superoxide dismutase precursor;
O3410017	33.9347	-2.3984	0.52925	4.53169	5.85132e-06	6.78387e-05	STM14_1192:tail fiber assembly protein;
O3410022	40.2252	-1.58798	0.441577	3.59616	0.000322944	0.00221875	STM14_1200:dihydroorotate dehydrogenase 2;
O3410024	216.657	1.04012	0.282055	-3.68765	0.000226333	0.00165574	STM14_1202:putative cytoplasmic protein;
O3410025	21.0428	1.70703	0.531266	-3.21313	0.00131295	0.00739641	STM14_1203:putative iron-sulfur protein;
O1220563	125.435	3.06873	0.478721	-6.41027	1.45259e-10	4.01318e-09	STM14_1204:23S rRNA m(2)G2445 methyltransferase;STM14_1205:ABC transporter ATPase;STM14_1206:paraquat-inducible protein A;STM14_1207:paraquat-inducible protein B;STM14_1208:putative outer membrane protein;
O1220566	157.644	1.23398	0.304056	-4.05841	4.94071e-05	0.000442449	STM14_1218:putative transporter;STM14_1219:hypothetical protein;
O3410033	707.044	-1.87071	0.307068	6.09215	1.11404e-09	2.63014e-08	STM14_1222:hypothetical protein;
O3410035	152.227	1.39356	0.338577	-4.11593	3.85624e-05	0.000358866	STM14_1229:sulfurtransferase TusE;
O1220570	63.6577	1.06514	0.374658	-2.84298	0.00446944	0.0209515	STM14_1236:pathogenicity island-encoded protein C(pipC);STM14_1237:secreted effector protein_sopB;
O1220576	114.505	-2.11487	0.432429	4.89068	1.00489e-06	1.32472e-05	STM14_1263:chaperone-modulator protein CbpM;STM14_1264:curved DNA-binding protein CbpA;
O3410050	388.659	-1.67139	0.266016	6.28303	3.32042e-10	8.71024e-09	STM14_1270:glucose-1-phosphatase/inositol phosphatase;
O3410057	36.5577	-2.07445	0.549033	3.77838	0.000157852	0.00120571	STM14_1286:hypothetical protein;
O3411652	3273.01	-1.57083	0.33886	4.63563	3.55857e-06	4.29842e-05	STM14_1297:Ser tRNA;
O3410066	47.2177	1.21286	0.405205	-2.99319	0.00276075	0.0138679	STM14_1312:hypothetical protein;
O3410069	591.466	-2.41983	0.367328	6.58766	4.46821e-11	1.33379e-09	STM14_1321:drug efflux system protein MdtG;
O3410074	280.979	-1.07522	0.329278	3.2654	0.00109311	0.00640815	STM14_1330:biofilm formation regulatory protein BssS;
O3410083	120.758	-1.20792	0.413714	2.91969	0.00350382	0.0171364	STM14_1360:putative inner membrane lipoprotein;
O1220597	541.69	1.75322	0.444155	-3.94731	7.90348e-05	0.000659978	STM14_1363:hypothetical protein;STM14_1364:50S ribosomal protein L32;
O3410092	2431.23	-2.38878	0.340132	7.02308	2.17026e-12	7.93824e-11	STM14_1386:hypothetical protein;
O3410094	249.018	-1.37949	0.446026	3.09284	0.00198251	0.0104646	STM14_1388:putative outer membrane protein;
O3410095	376.672	-4.57233	0.448641	10.1915	2.16389e-24	5.10875e-22	STM14_1399:hypothetical protein;
O3410100	1091.95	-1.48259	0.343286	4.31881	1.5687e-05	0.000167651	STM14_1407:putative cytoplasmic protein;
O3410101	138.985	1.01545	0.29812	-3.40618	0.000658786	0.00418305	STM14_1416:isocitrate dehydrogenase;
O3410107	3250.78	-1.64945	0.378479	4.35809	1.31203e-05	0.00014377	STM14_1446:putative bacteriophage protein;
O3410108	4776.67	-1.20309	0.356119	3.37833	0.000729279	0.00456371	STM14_1447:hypothetical protein;
O3410109	55.3292	-1.34444	0.436811	3.07787	0.00208488	0.0109826	STM14_1448:hypothetical protein;
O3410111	137.444	-1.04216	0.298379	3.49274	0.0004781	0.00311966	STM14_1454:hypothetical protein;
O3410114	104.242	-1.50718	0.33284	4.52823	5.94799e-06	6.8653e-05	STM14_1480:PagJ;
O3410115	174.357	-1.71387	0.41387	4.14109	3.45656e-05	0.000324068	STM14_1481:hypothetical protein;
O3410116	235.846	-1.58105	0.282888	5.58898	2.28412e-08	4.26753e-07	STM14_1483:SspH1;
O3410117	200.738	-2.31519	0.310114	7.46563	8.29013e-14	4.14028e-12	STM14_1484:hypothetical protein;
O3410118	102.311	1.04879	0.321817	-3.25896	0.00111821	0.00649894	STM14_1485:isocitrate dehydrogenase;
O3410122	186.327	1.18522	0.293407	-4.03953	5.35593e-05	0.000476347	STM14_1492:macrophage survival protein;
O3410125	53.5745	2.84472	0.563416	-5.04906	4.43983e-07	6.49463e-06	STM14_1495:cold shock-like protein;
O3410129	721.997	-1.55288	0.304944	5.09233	3.53681e-07	5.37141e-06	STM14_1502:hypothetical protein;
O3411653	17.4557	3.0441	0.725448	-4.19616	2.71474e-05	0.000263904	STM14_1503:Arg tRNA;
O3410134	144.346	-3.84351	0.518234	7.41655	1.20214e-13	5.6763e-12	STM14_1509:putative molecular chaperone;
O1220621	32.9148	-2.46572	0.693129	3.55738	0.000374573	0.00251863	STM14_1515:putative ABC transporter periplasmic binding protein;STM14_1516:putative ABC transporter protein;STM14_1517:putative ABC transporter protein;STM14_1518:ABC transporter ATP-binding protein;STM14_1519:ABC transporter ATP-binding protein;
O3410163	26.2934	-2.13634	0.582083	3.67017	0.00024239	0.00173289	STM14_1548:putative regulatory protein;
O1220626	501.176	-2.19412	0.259865	8.44333	3.08416e-17	3.0806e-15	STM14_1554:hypothetical protein;STM14_1555:salivary secreted protein;
O3410165	305.998	-1.75336	0.437913	4.00391	6.23039e-05	0.000536171	STM14_1556:hypothetical protein;
O1220628	20.7487	-2.05849	0.63339	3.24996	0.00115421	0.0066316	STM14_1563:aldose 1-epimerase;STM14_1564:hypothetical protein;
O3410174	219.436	1.26946	0.339325	-3.74114	0.00018319	0.00136708	STM14_1573:protease 4;
O3410181	7729.8	-1.09037	0.292161	3.73208	0.000189905	0.00141313	STM14_1592:DNA-binding transcriptional activator OsmE;
O3410190	61.9026	-1.68668	0.410239	4.11146	3.93163e-05	0.00036308	STM14_1608:putative cytoplasmic protein;
O1220640	112.89	-1.70671	0.433309	3.93878	8.18969e-05	0.000679509	STM14_1619:threonyl-tRNA synthetase;STM14_1620:translation initiation factor IF-3;
O3410197	77.8348	-1.54945	0.495997	3.12392	0.00178458	0.00961528	STM14_1621:50S ribosomal protein L35;
O1220642	66.5736	-1.02313	0.395743	2.58535	0.00972797	0.0379224	STM14_1627:vtamin B12-transporter permease;STM14_1628:putative glutathione peroxidase;STM14_1629:vitamin B12-transporter ATPase;STM14_1630:lipoprotein;
O3410201	174.025	1.10812	0.33018	-3.35612	0.000790429	0.00488749	STM14_1634:hypothetical protein;
O3410202	256.072	1.14067	0.400073	-2.85115	0.00435619	0.0204946	STM14_1635:phospho-2-dehydro-3-deoxyheptonate aldolase;
O3410209	235.939	-2.01412	0.355289	5.66898	1.4365e-08	2.78403e-07	STM14_1646:putative transcriptional regulator;
O1220649	136.94	2.7584	0.584345	-4.7205	2.35265e-06	2.882e-05	STM14_1663:iron-sulfur cluster assembly scaffold protein;STM14_1664:cysteine desulfurase activator complex subunit SufB;STM14_1665:cysteine desulfurase;STM14_1666:cysteine desulfurase activator complex subunit SufD;STM14_1667:selenocysteine lyase;STM14_1668:cysteine desufuration protein SufE;
O3410220	341.486	1.4279	0.276916	-5.15643	2.51698e-07	3.96158e-06	STM14_1672:pyruvate kinase;
O1220654	21.4664	-2.35637	0.659135	3.57494	0.000350314	0.00236918	STM14_1688:secreted effector protein;STM14_1689:outer membrane secretin precursor;STM14_1690:virulence protein;STM14_1691:secretion system effector;
O1220655	20.5646	-2.46718	0.680735	3.62429	0.000289758	0.00202286	STM14_1693:secretion system chaperone protein;STM14_1694:translocation machinery component;STM14_1695:secretion system chaperone;STM14_1696:translocation machinery component;STM14_1697:translocation machinery component;STM14_1698:secreted effector protein;
O1220657	70.3466	-1.88034	0.449436	4.18377	2.86719e-05	0.000273753	STM14_1702:type III secretion system apparatus protein;STM14_1703:type III secretion system apparatus protein;STM14_1704:type III secretion system apparatus protein;STM14_1705:needle complex inner membrane lipoprotein;
O1220659	21.9239	-2.6623	0.741088	3.59242	0.000327626	0.00224497	STM14_1709:type III secretion system apparatus protein;STM14_1710:secretion system apparatus protein SsaV;STM14_1711:type III secretion system ATPase;
O1220661	43.73	-1.87829	0.513981	3.65441	0.000257777	0.00181647	STM14_1715:type III secretion system protein;STM14_1716:type III secretion system apparatus protein;STM14_1717:type III secretion system apparatus protein;STM14_1718:secretion system apparatus protein SsaU;STM14_1719:hypothetical protein;
O3410230	213.974	1.67811	0.293433	-5.71891	1.07209e-08	2.1417e-07	STM14_1725:inner membrane transport protein YdhC;
O3410232	16.9893	1.36537	0.550925	-2.47832	0.0132004	0.0485756	STM14_1727:DNA-binding transcriptional repressor PurR;
O3410233	19.1191	2.01275	0.592083	-3.39944	0.00067525	0.00427713	STM14_1728:hypothetical protein;
O3410234	112.227	-3.19588	0.515836	6.19554	5.80856e-10	1.46455e-08	STM14_1729:superoxide dismutase;
O3410237	78.7154	1.158	0.412821	-2.80508	0.00503046	0.0230002	STM14_1732:ribonuclease T;
O3410238	45.0706	1.63942	0.39455	-4.15518	3.25033e-05	0.000306949	STM14_1742:transcriptional regulator SlyA;
O3410239	1750.32	-1.04557	0.345572	3.02563	0.00248114	0.0126343	STM14_1743:putative outer membrane lipoprotein;
O1220665	129.053	-1.57978	0.347378	4.54772	5.42307e-06	6.34402e-05	STM14_1745:lysozyme inhibitor;STM14_1746:pyridoxamine 5'-phosphate oxidase;
O3410242	42.1901	1.58738	0.448289	-3.54097	0.000398651	0.00264782	STM14_1750:putative tripeptide transporter permease;
O1220667	724.935	1.14832	0.304668	-3.76909	0.000163845	0.00124782	STM14_1752:endonuclease III;STM14_1753:SoxR-reducing system protein RsxE;STM14_1754:electron transport complex protein RnfG;STM14_1755:electron transport complex protein RnfD;STM14_1756:electron transport complex protein RnfC;STM14_1757:electron transport complex protein RnfB;STM14_1758:Na(+)-translocating NADH-quinone reductase subunit E;
O3410244	309.82	1.14441	0.309316	-3.69982	0.000215751	0.00158278	STM14_1759:putative inner membrane protein;
O3410246	24.6066	1.52037	0.482294	-3.15238	0.00161947	0.00885327	STM14_1761:hypothetical protein;
O1220669	482.525	-1.81192	0.295858	6.12429	9.10897e-10	2.21084e-08	STM14_1770:fumarase A;STM14_1771:fumarase A;
O3410260	36.2033	-1.66813	0.508271	3.28197	0.00103084	0.00608429	STM14_1790:hypothetical protein;
O1220674	713.546	1.11323	0.437135	-2.54666	0.010876	0.0414148	STM14_1793:putative protease;STM14_1794:hypothetical protein;STM14_1795:acid shock protein;
O1220678	115.175	-1.45517	0.415576	3.50156	0.000462542	0.00302575	STM14_1814:spermidine N1-acetyltransferase;STM14_1815:hypothetical protein;
O3410277	49.4218	1.56896	0.43576	-3.6005	0.0003176	0.00219364	STM14_1831:hypothetical protein;
O3410278	39.0106	-1.8157	0.525258	3.45677	0.000546683	0.00351419	STM14_1832:hypothetical protein;
O1220686	17.6272	-1.72343	0.637832	2.70201	0.00689222	0.0294878	STM14_1864:putative multidrug efflux protein;STM14_1865:hypothetical protein;
O3410294	13.219	1.83348	0.630981	-2.90576	0.00366368	0.0178175	STM14_1869:putative translation initiation inhibitor;
O3410298	81.2331	-1.93568	0.407634	4.74856	2.04873e-06	2.52159e-05	STM14_1878:putative transcriptional regulator;
O3410301	32.0181	-1.53036	0.58078	2.63501	0.00841337	0.0340866	STM14_1886:putative envelope protein;
O1220692	92.6896	2.18841	0.322482	-6.78614	1.1517e-11	3.7387e-10	STM14_1892:formate dehydrogenase-N subunit gamma;STM14_1893:formate dehydrogenase-N beta subunit;STM14_1894:formate dehydrogenase-N subunit alpha;
O1220695	95.9962	-1.87882	0.374464	5.01735	5.23897e-07	7.51691e-06	STM14_1910:putative arylamine N-acetyltransferase;STM14_1911:hypothetical protein;STM14_1912:putative cytoplasmic protein;
O3410314	37.2074	1.2917	0.447084	-2.88916	0.00386272	0.0186459	STM14_1913:hypothetical protein;
O3410319	16.2358	2.66003	0.751182	-3.54113	0.00039842	0.00264782	STM14_1918:hypothetical protein;
O3410322	63.1345	-1.08785	0.433654	2.50856	0.0121225	0.0454944	STM14_1921:putative DNA-binding transcriptional regulator;
O3410330	17.7454	-1.78018	0.687864	2.58798	0.00965392	0.0377011	STM14_1940:secreted effector protein;
O3410331	41.3108	2.31698	0.803252	-2.8845	0.00392037	0.0188541	STM14_1941:hypothetical protein;
O3410337	75.7751	1.1861	0.322168	-3.68162	0.000231758	0.00167654	STM14_1962:glucan biosynthesis protein D;
O3410338	10029.9	-1.5857	0.27046	5.86298	4.5464e-09	9.52178e-08	STM14_1965:putative transcriptional regulator;
O1220707	13.3391	1.57733	0.624172	-2.52708	0.0115015	0.043415	STM14_1968:alcohol dehydrogenase class III;STM14_1969:putative cytoplasmic protein;
O3410349	69.7832	1.17008	0.440134	-2.65846	0.0078499	0.0325566	STM14_1982:putative SAM-dependent methyltransferase;
O3410354	114.301	-1.88047	0.346621	5.42513	5.79122e-08	1.0162e-06	STM14_1992:heat-inducible protein;
O3410361	119.548	-1.00255	0.3677	2.72655	0.00640001	0.027794	STM14_2001:ATP-dependent RNA helicase DbpA;
O3410366	756.52	-1.05553	0.412738	2.55739	0.0105462	0.0403959	STM14_2008:universal stress protein UspE;
O3410375	41.8817	-1.24325	0.43788	2.83925	0.00452194	0.0211594	STM14_2022:oxidoreductase;
O1220715	16.0863	-4.34811	1.08381	4.01188	6.02378e-05	0.000523203	STM14_2034:hypothetical protein;STM14_2035:putative ATPase;
O3410385	658.943	-1.06253	0.295908	3.59075	0.000329723	0.0022534	STM14_2036:thiosulfate:cyanide sulfurtransferase;
O3410402	75.3558	-1.86576	0.429339	4.34567	1.3885e-05	0.000149623	STM14_2062:lipoprotein;
O1220719	228.842	-1.51107	0.379907	3.97747	6.96524e-05	0.000595024	STM14_2066:hypothetical protein;STM14_2067:putative inner membrane protein;
O3410407	3047.38	1.08145	0.215397	-5.02074	5.14734e-07	7.46796e-06	STM14_2071:hypothetical protein;
O3410413	754.904	-1.14312	0.268561	4.25647	2.07678e-05	0.000212339	STM14_2077:hypothetical protein;
O1220721	41.9969	1.14792	0.427661	-2.68418	0.00727082	0.0306034	STM14_2085:trp operon leader peptide;STM14_2086:anthranilate synthase component I;STM14_2087:bifunctional anthranilate synthase/anthranilate phosphoribosyltransferase;STM14_2088:bifunctional indole-3-glycerol phosphate synthase/phosphoribosylanthranilate isomerase;STM14_2089:tryptophan synthase subunit beta;STM14_2090:tryptophan synthase subunit alpha;
O3410419	567.828	-2.02058	0.412971	4.89279	9.94182e-07	1.32405e-05	STM14_2095:outer membrane protein W;
O3410428	501.55	-1.44799	0.355344	4.07491	4.60323e-05	0.000416043	STM14_2113:bifunctional acetaldehyde-CoA/alcohol dehydrogenase;
O1220727	14.1285	2.11874	0.643569	-3.29217	0.000994166	0.00589463	STM14_2121:hypothetical protein;STM14_2122:formyltetrahydrofolate deformylase;
O3410445	2820.59	-1.24272	0.418899	2.96664	0.00301073	0.0149787	STM14_2155:hypothetical protein;
O3410446	1112.92	1.34352	0.241314	-5.56751	2.58412e-08	4.72602e-07	STM14_2156:peptidyl-tRNA hydrolase;
O3410451	20.5205	-2.50096	0.745377	3.3553	0.00079279	0.00489044	STM14_2170:glutamate dehydrogenase-like protein;
O3410453	493.251	-1.70407	0.371411	4.58809	4.4731e-06	5.35329e-05	STM14_2172:trehalase;
O3410460	526.826	-2.23254	0.363026	6.14983	7.75679e-10	1.91851e-08	STM14_2181:hypothetical protein;
O3410463	25.872	-1.6143	0.564305	2.86068	0.00422727	0.0199968	STM14_2184:disulfide bond formation protein B;
O3410465	299.617	-1.17909	0.374746	3.14639	0.001653	0.00899968	STM14_2186:putative cytoplasmic protein;
O1220738	976.607	1.38263	0.316928	-4.36258	1.28536e-05	0.000142046	STM14_2193:septum formation inhibitor;STM14_2194:cell division inhibitor MinD;STM14_2195:cell division topological specificity factor MinE;
O1220739	204.621	-1.72881	0.495396	3.48976	0.000483456	0.00314671	STM14_2197:transposase;STM14_2198:hypothetical protein;
O1220742	65.7616	3.71129	0.615713	-6.02762	1.66387e-09	3.79042e-08	STM14_2208:L-serine deaminase I/L-threonine deaminase I;STM14_2209:diguanylate cyclase;
O1220744	127.862	-1.16866	0.323107	3.61696	0.000298086	0.00207025	STM14_2212:mannose-specific enzyme IIAB;STM14_2213:mannose-specific enzyme IIC;STM14_2214:mannose-specific PTS system protein IID;STM14_2215:hypothetical protein;
O3410487	31.5614	2.37002	0.562034	-4.21686	2.4773e-05	0.000243695	STM14_2244:type III-secreted effector protein;
O3410494	20.1323	-1.70606	0.595285	2.86596	0.00415745	0.0197746	STM14_2251:putative cytoplasmic protein;
O3410502	101.722	-1.4265	0.374748	3.80656	0.000140914	0.00108348	STM14_2265:PagK;
O3410506	135.327	-2.38793	0.533676	4.47448	7.65963e-06	8.57417e-05	STM14_2276:hypothetical protein;
O1220755	647.474	-1.61649	0.278478	5.80472	6.44738e-09	1.33951e-07	STM14_2278:hypothetical protein;STM14_2279:putative inner membrane protein;STM14_2280:hypothetical protein;
O3410510	39.2008	2.23066	0.804988	-2.77105	0.00558763	0.0247207	STM14_2288:phosphoribosylglycinamide formyltransferase 2;
O3410521	144.99	-1.37459	0.325148	4.22758	2.36223e-05	0.000233259	STM14_2312:aspartyl-tRNA synthetase;
O1220769	991.327	1.69999	0.243198	-6.99014	2.74616e-12	9.76956e-11	STM14_2334:methyl accepting chemotaxis protein II;STM14_2335:purine-binding chemotaxis protein;STM14_2336:chemotaxis protein CheA;STM14_2337:flagellar motor protein MotB;STM14_2338:flagellar motor protein MotA;STM14_2339:hypothetical protein;STM14_2340:transcriptional activator FlhC;STM14_2341:transcriptional activator FlhD;
O1220771	10.1167	-3.64497	1.20269	3.03069	0.00243996	0.0124736	STM14_2345:trehalose-6-phosphate synthase;STM14_2346:trehalose-6-phosphate phosphatase;
O3410528	219.372	-1.0047	0.318303	3.15643	0.00159711	0.00875043	STM14_2350:ferritin-like protein;
O3410530	94.8725	2.35357	0.400711	-5.87348	4.26743e-09	9.01017e-08	STM14_2352:putative outer membrane lipoprotein;
O3410534	122.999	-1.35947	0.408861	3.32503	0.000884101	0.00532717	STM14_2356:hypothetical protein;
O1220778	56.5922	1.48123	0.509965	-2.90457	0.00367759	0.0178518	STM14_2380:flagellar capping protein;STM14_2381:flagellar protein FliS;STM14_2382:flagellar biosynthesis protein FliT;
O3410541	87.3334	-1.76813	0.389786	4.53616	5.72888e-06	6.6717e-05	STM14_2384:hypothetical protein;
O3410542	78.1453	3.84036	0.367279	-10.4563	1.37168e-25	3.95806e-23	STM14_2387:putative 50S ribosomal protein;
O1220781	20.3191	2.8897	0.588113	-4.91351	8.94612e-07	1.20379e-05	STM14_2396:flagellar basal body-associated protein FliL;STM14_2397:flagellar motor switch protein FliM;STM14_2398:flagellar motor switch protein FliN;STM14_2399:flagellar biosynthesis protein FliO;STM14_2400:flagellar biosynthesis protein FliP;STM14_2401:flagellar biosynthesis protein FliQ;STM14_2402:flagellar biosynthesis protein FliR;
O3410545	17.4316	1.58534	0.611713	-2.59164	0.00955202	0.0374157	STM14_2403:colanic acid capsular biosynthesis activation protein A;
O3410546	3083.21	-1.25868	0.237731	5.29454	1.19314e-07	1.9488e-06	STM14_2404:hypothetical protein;
O3410547	213.836	-1.53148	0.360966	4.24273	2.20817e-05	0.000221413	STM14_2405:putative cytoplasmic protein;
O3410562	219.315	-2.48958	0.327286	7.60672	2.81138e-14	1.73837e-12	STM14_2475:hypothetical protein;
O3410565	69.545	1.61177	0.560938	-2.87335	0.00406146	0.0194386	STM14_2489:putative endoprotease;
O3410572	342.564	-1.25169	0.309537	4.04374	5.2605e-05	0.000469468	STM14_2498:hypothetical protein;
O3410574	23.3204	2.25911	0.561432	-4.02384	5.72571e-05	0.000504015	STM14_2524:hypothetical protein;
O3410578	709.052	-1.02442	0.259288	3.95088	7.7865e-05	0.000652308	STM14_2551:DNA gyrase inhibitor;
O1220799	264.649	-2.18631	0.366975	5.95766	2.55883e-09	5.63159e-08	STM14_2553:thiosulfate reductase cytochrome B subunit;STM14_2554:thiosulfate reductase electron transport protein;STM14_2555:thiosulfate reductase;
O1220800	146.237	-1.03334	0.37441	2.75992	0.00578159	0.025492	STM14_2563:putative transcriptional regulator;STM14_2564:putative dehydratase;
O1220802	17.1469	1.57739	0.599831	-2.62972	0.0085454	0.0344068	STM14_2576:undecaprenol-phosphate galactosephosphotransferase/O-antigen transferase;STM14_2577:phosphomannomutase;STM14_2578:mannose-1-phosphate guanylyltransferase;STM14_2579:rhamnosyl transferase;STM14_2580:mannosyl transferase;
O3410593	16.198	-3.80268	0.990116	3.84064	0.000122715	0.000955273	STM14_2615:putative inner membrane protein;
O3410606	83.447	-1.52348	0.413752	3.68212	0.000231305	0.00167654	STM14_2642:fructose-bisphosphate aldolase;
O3410607	166.058	-1.67295	0.371749	4.50022	6.78841e-06	7.73223e-05	STM14_2649:hypothetical protein;
O3410608	80.1655	1.09328	0.425697	-2.5682	0.0102228	0.0393225	STM14_2650:hypothetical protein;
O3410611	150.753	2.52834	0.44921	-5.62843	1.81861e-08	3.47274e-07	STM14_2656:putative outer membrane protein;
O1220817	432.657	-1.84865	0.306476	6.03196	1.61981e-09	3.72271e-08	STM14_2666:putative ABC-type proline/glycine betaine transport system permease component;STM14_2667:putative ABC-type proline/glycine betaine transport system ATPase component;STM14_2668:putative ABC-type proline/glycine betaine transport system permease component;STM14_2669:putative transport protein;
O3410620	69.3934	-1.1713	0.386147	3.03331	0.0024189	0.0124148	STM14_2672:D-lactate dehydrogenase;
O3410626	109.438	-1.49007	0.353888	4.21057	2.54727e-05	0.000248694	STM14_2698:galactose transport protein;
O3410644	728.411	2.2857	0.253919	-9.00169	2.22277e-19	2.88627e-17	STM14_2737:putative outer membrane lipoprotein;
O1220834	33.3155	-2.49097	0.595349	4.18404	2.86371e-05	0.000273753	STM14_2740:putative ABC transporter periplasmic binding protein;STM14_2741:putative ABC-type dipeptide/oligopeptide/nickel transport system permease;STM14_2742:putative ABC-type dipeptide/oligopeptide/nickel transport system permease component;STM14_2743:ABC transporter ATP-binding protein;
O3410647	756.128	-1.44754	0.221957	6.5217	6.95131e-11	1.94114e-09	STM14_2744:hypothetical protein;
O3411670	782.541	1.38302	0.348635	-3.96695	7.27985e-05	0.00061688	STM14_2755:Pro tRNA;
O3410652	551.735	2.80045	0.358273	-7.81652	5.43047e-15	3.7113e-13	STM14_2758:O-antigen acetylase;
O1220842	10.9398	2.43074	0.813803	-2.98689	0.00281834	0.0141026	STM14_2786:quinol dehydrogenase membrane component;STM14_2787:quinol dehydrogenase periplasmic component;STM14_2788:nitrate reductase;STM14_2789:assembly protein for periplasmic nitrate reductase;STM14_2790:ferredoxin-type protein;
O3410663	88.0733	-1.85773	0.551028	3.37139	0.000747886	0.00464656	STM14_2792:ecotin;
O1220843	48.9154	-2.47394	0.487603	5.07368	3.90201e-07	5.89158e-06	STM14_2793:multidrug transporter membrane protein/ATP-binding component;STM14_2794:DNA repair system protein;STM14_2795:O6-methylguanine-DNA methyltransferase/transcription activator/repressor;
O1220844	59.2128	1.475	0.346514	-4.2567	2.07469e-05	0.000212339	STM14_2800:phosphotransfer intermediate protein in two-component regulatory system with RcsBC;STM14_2801:transcriptional regulator RcsB;
O1220845	80.3034	1.05554	0.384766	-2.74332	0.00608211	0.0267263	STM14_2803:hypothetical protein;STM14_2804:DNA gyrase subunit A;
O3410671	47.1452	1.36365	0.420055	-3.24636	0.0011689	0.00670118	STM14_2812:ribonucleotide-diphosphate reductase subunit alpha;
O1220848	265.302	-1.62184	0.304008	5.33486	9.56206e-08	1.60211e-06	STM14_2813:ribonucleotide-diphosphate reductase subunit beta;STM14_2814:2Fe-2S ferredoxin;
O1220850	126.199	3.05176	0.620412	-4.91892	8.70247e-07	1.1771e-05	STM14_2819:sn-glycerol-3-phosphate dehydrogenase subunit A;STM14_2820:anaerobic glycerol-3-phosphate dehydrogenase subunit B;STM14_2821:sn-glycerol-3-phosphate dehydrogenase subunit C;STM14_2822:hypothetical protein;STM14_2823:hypothetical protein;STM14_2824:deubiquitinase;
O1220851	120.764	-1.58926	0.373265	4.25773	2.06512e-05	0.000212339	STM14_2825:putative cytoplasmic protein;STM14_2826:putative aldolase;STM14_2827:putative transport protein;STM14_2828:putative galactonate dehydratase;STM14_2829:putative transcriptional regulator;
O1220852	2439.08	-1.36303	0.320785	4.24906	2.14669e-05	0.000218112	STM14_2835:UDP-4-amino-4-deoxy-L-arabinose--oxoglutarate aminotransferase;STM14_2836:undecaprenyl phosphate 4-deoxy-4-formamido-L-arabinose transferase;STM14_2837:bifunctional UDP-glucuronic acid decarboxylase/UDP-4-amino-4-deoxy-L-arabinose formyltransferase;STM14_2838:putative cytoplasmic protein;STM14_2839:4-amino-4-deoxy-L-arabinose transferase;STM14_2840:putative inner membrane protein;STM14…
O1220854	39.6193	1.20692	0.409563	-2.94684	0.00321039	0.0158506	STM14_2849:hypothetical protein;STM14_2850:hypothetical protein;
O3410683	81.5723	-1.26932	0.45026	2.81908	0.0048161	0.0222157	STM14_2854:hypothetical protein;
O3410694	47.1422	-1.68563	0.560254	3.00869	0.00262375	0.0132632	STM14_2889:putative PTS system transporter subunit A component;
O1220861	91.1027	1.54801	0.441857	-3.50341	0.000459335	0.00301235	STM14_2892:putative NTP pyrophosphohydrolase;STM14_2893:phosphodiesterase;
O3410704	21.5143	-4.21528	0.996922	4.22829	2.35471e-05	0.000233259	STM14_2908:putative regulatory protein;
O1220865	846.232	1.85709	0.282054	-6.58417	4.57448e-11	1.33482e-09	STM14_2912:hypothetical protein;STM14_2913:bifunctional folylpolyglutamate synthase/dihydrofolate synthase;STM14_2914:acetyl-CoA carboxylase subunit beta;
O3410710	14.7298	-2.47019	0.774776	3.18826	0.00143131	0.00794253	STM14_2926:putative inner membrane protein;
O3410711	402.95	-1.03856	0.286395	3.62633	0.000287481	0.00201237	STM14_2927:3-oxoacyl-ACP synthase;
O3410714	341.968	-1.21142	0.401827	3.01477	0.00257176	0.0130447	STM14_2936:phosphohistidine phosphatase;
O1220870	350.919	-1.96769	0.334863	5.8761	4.20052e-09	8.94161e-08	STM14_2947:activator;STM14_2948:phosphoglycerate transport system sensor protein;STM14_2949:phosphoglycerate transport regulatory protein precursor;
O3410722	20.7016	-5.53451	1.44158	3.83919	0.000123439	0.000955273	STM14_2950:transporter;
O3410723	2175.08	-1.19078	0.26391	4.51206	6.42008e-06	7.37741e-05	STM14_2951:putative inner membrane protein;
O3410726	5497.34	-1.13617	0.276384	4.11082	3.94257e-05	0.00036308	STM14_2954:aminotransferase;
O3410730	65.4436	-2.34796	0.484637	4.84478	1.26752e-06	1.62958e-05	STM14_2958:indolepyruvate decarboxylase;
O3410731	1706.68	-2.57702	0.339852	7.58278	3.3824e-14	1.86895e-12	STM14_2961:hypothetical protein;
O1220872	346.725	-1.3662	0.321622	4.24784	2.15845e-05	0.000218112	STM14_2967:putative negative regulator;STM14_2968:putative negative regulator;
O3411678	41.4777	2.26716	0.465238	-4.87312	1.09848e-06	1.43354e-05	STM14_2973:Lys tRNA;
O1220874	51.5582	1.69585	0.463262	-3.66068	0.000251548	0.00178489	STM14_2985:cysteine synthase A;STM14_2986:hypothetical protein;
O3410746	419.151	-1.62	0.405981	3.99033	6.59825e-05	0.000565533	STM14_2988:hypothetical protein;
O1220876	25.1089	-1.64004	0.570937	2.87254	0.00407186	0.0194386	STM14_2992:putative cytoplasmic protein;STM14_2993:pyridoxal kinase;
O1220877	28.5036	-2.57281	0.664644	3.87096	0.000108407	0.000863601	STM14_2994:putative regulatory protein;STM14_2995:glutamine amidotransferase;
O3410747	1314.69	-2.69829	0.334114	8.07598	6.69374e-16	5.60763e-14	STM14_3003:short chain dehydrogenase;
O1220880	13.4586	2.10674	0.783792	-2.68788	0.00719075	0.0303649	STM14_3004:putative iron-dependent peroxidase;STM14_3005:hypothetical protein;
O1220887	423.063	1.50888	0.453108	-3.33006	0.000868258	0.00527247	STM14_3035:putative cytoplasmic protein;STM14_3036:hypothetical protein;STM14_3037:hypothetical protein;
O3410756	55.7611	1.46804	0.444003	-3.30637	0.000945126	0.00564251	STM14_3044:aminoglycoside/multidrug efflux system;
O1220889	253.278	-1.29202	0.33075	3.90632	9.37111e-05	0.000767635	STM14_3048:putative acetyltransferase;STM14_3049:putative inner membrane protein;
O3410757	406.211	2.28717	0.61753	-3.70373	0.000212453	0.00156744	STM14_3050:phosphoribosylaminoimidazolesuccinocarboxamide synthase;
O3410758	17.9964	1.69985	0.643018	-2.64355	0.00820428	0.0337128	STM14_3057:putative permease;
O3410759	1363.2	1.45981	0.368199	-3.96474	7.3476e-05	0.000619536	STM14_3062:uracil phosphoribosyltransferase;
O3410761	31.6741	1.28973	0.490366	-2.63015	0.00853479	0.0344068	STM14_3068:putative diguanylate cyclase;
O3410768	162.487	2.09655	0.36473	-5.74822	9.0187e-09	1.81562e-07	STM14_3077:exodeoxyribonuclease VII large subunit;
O3410773	188.792	-1.61304	0.294316	5.48064	4.23786e-08	7.48689e-07	STM14_3089:GTP-binding protein EngA;
O3410777	1063.16	-1.89132	0.306936	6.16194	7.18597e-10	1.79442e-08	STM14_3106:3-mercaptopyruvate sulfurtransferase;
O3410785	4999.08	-2.13126	0.266139	8.00808	1.16517e-15	9.16954e-14	STM14_3121:putative rRNA methylase;
O3410788	576.62	1.09895	0.383898	-2.86261	0.00420169	0.019912	STM14_3124:inositol monophosphatase;
O3410790	157.325	-2.05384	0.322802	6.36256	1.98422e-10	5.40994e-09	STM14_3131:stationary phase inducible protein CsiE;
O3410796	74.2707	8.14043	0.797389	-10.2089	1.8098e-24	4.70005e-22	STM14_3137:lysine/cadaverine antiporter;
O1220911	10435.3	-2.57958	0.290033	8.8941	5.88954e-19	6.95233e-17	STM14_3140:nitrogen regulatory protein P-II 1;STM14_3141:putative transcriptional regulator;STM14_3142:hypothetical protein;STM14_3143:putative sensor kinase;
O3410798	14.7207	2.35274	0.768542	-3.06131	0.00220374	0.0114692	STM14_3145:phosphoribosylformylglycinamidine synthase;
O1220913	61.4104	1.2151	0.365701	-3.32267	0.000891616	0.00536002	STM14_3149:hypothetical protein;STM14_3150:putative phosphotransferase system IIB component;STM14_3151:N-acetylmuramic acid 6-phosphate etherase;
O1220916	20.0998	1.86775	0.660448	-2.82801	0.00468387	0.0217603	STM14_3157:4'-phosphopantetheinyl transferase;STM14_3158:pyridoxal phosphate biosynthetic protein PdxJ;STM14_3159:DNA repair protein RecO;STM14_3160:GTP-binding protein Era;STM14_3161:ribonuclease III;
O1220917	28.1665	1.2765	0.444199	-2.8737	0.00405688	0.0194386	STM14_3162:signal peptidase I;STM14_3163:GTP-binding protein LepA;
O3410810	26.0457	-1.74254	0.668338	2.60727	0.0091266	0.036149	STM14_3211:hypothetical protein;
O1220928	20.4928	2.39025	0.650411	-3.67499	0.000237858	0.00171113	STM14_3219:hypothetical protein;STM14_3220:hypothetical protein;
O3410815	36.5943	1.52066	0.497053	-3.05934	0.00221823	0.0115215	STM14_3237:L-aspartate oxidase;
O3410817	77.9711	-1.17927	0.362092	3.25684	0.00112662	0.00653086	STM14_3241:putative transcriptional regulator;
O3410824	380.625	1.58723	0.635481	-2.49769	0.0125006	0.0465102	STM14_3253:putative cytoplasmic protein;
O3411681	1107.47	3.10582	0.604332	-5.13926	2.75817e-07	4.26367e-06	STM14_3256:23S ribosomal RNA;
O3411682	446.833	1.9669	0.553206	-3.55545	0.000377332	0.0025256	STM14_3257:Glu tRNA;
O3410827	4529.42	-2.99686	0.224892	13.3258	1.63952e-40	1.41928e-37	STM14_3261:protein disaggregation chaperone;
O3410828	548.784	1.51513	0.290722	-5.21163	1.87186e-07	3.00312e-06	STM14_3264:outer membrane protein assembly complex subunit YfiO;
O1220936	26367.9	-1.66364	0.329527	5.04856	4.45146e-07	6.49463e-06	STM14_3266:translation inhibitor protein RaiA;STM14_3267:hypothetical protein;
O1220939	353.152	2.4535	0.535192	-4.58433	4.55441e-06	5.4256e-05	STM14_3276:50S ribosomal protein L19;STM14_3277:tRNA (guanine-N(1)-)-methyltransferase;STM14_3278:16S rRNA-processing protein;STM14_3279:30S ribosomal protein S16;
O3410836	15.7581	-1.64979	0.66126	2.49491	0.0125987	0.0467413	STM14_3285:putative cytoplasmic protein;
O3410841	283.023	-1.2146	0.283425	4.28546	1.82361e-05	0.000190964	STM14_3294:SsrA-binding protein;
O3410843	60.2716	1.2525	0.394443	-3.17537	0.00149647	0.00825125	STM14_3296:hypothetical protein;
O1220943	2182.73	-1.50305	0.320672	4.6872	2.7697e-06	3.37695e-05	STM14_3302:integrase-like protein;STM14_3303:hypothetical protein;STM14_3304:hypothetical protein;
O3410853	10.3958	-4.51406	1.30543	3.45792	0.000544371	0.00350802	STM14_3325:putative dipeptide/oligopeptide/nickel ABC-type transport system periplasmic component;
O3410864	19.6564	-2.57861	0.73934	3.48773	0.000487147	0.0031628	STM14_3341:hypothetical protein;
O3410869	66.5106	1.35636	0.375006	-3.61691	0.000298142	0.00207025	STM14_3348:outer membrane receptor FepA;
O3410870	835.488	-2.26058	0.37458	6.03498	1.58981e-09	3.68638e-08	STM14_3350:secreted effector protein;
O1220953	552.833	1.61725	0.434241	-3.72431	0.000195849	0.00144906	STM14_3361:tricarboxylic transport;STM14_3362:tricarboxylic transport;STM14_3363:tricarboxylic transport;
O1220954	61.5173	-2.34173	0.488497	4.79375	1.63691e-06	2.06362e-05	STM14_3365:hypothetical protein;STM14_3366:hypothetical protein;STM14_3367:succinate-semialdehyde dehydrogenase I;STM14_3368:4-aminobutyrate aminotransferase;
O3410883	165.024	-1.45844	0.302731	4.81763	1.45277e-06	1.84943e-05	STM14_3383:hypothetical protein;
O1220960	18.2657	2.80565	0.684795	-4.09707	4.1842e-05	0.000382618	STM14_3387:glutaredoxin-like protein;STM14_3388:ribonucleotide reductase stimulatory protein;STM14_3389:ribonucleotide-diphosphate reductase subunit alpha;STM14_3390:ribonucleotide-diphosphate reductase subunit beta;
O3410892	663.221	2.58115	0.357856	-7.2128	5.48119e-13	2.25947e-11	STM14_3413:alanyl-tRNA synthetase;
O1220966	41.8825	-1.52848	0.446446	3.42367	0.000617821	0.00394221	STM14_3422:glucitol/sorbitol-specific enzyme IIC component;STM14_3423:PTS system glucitol/sorbitol-specific transporter subunit IIB;STM14_3424:glucitol/sorbitol-specific PTS system component IIA;STM14_3425:sorbitol-6-phosphate dehydrogenase;STM14_3426:DNA-binding transcriptional activator GutM;
O3410897	44.0984	1.65372	0.424001	-3.90026	9.60882e-05	0.000779816	STM14_3427:hypothetical protein;
O3410900	24.8038	-1.92926	0.593349	3.25148	0.00114805	0.00661086	STM14_3456:hypothetical protein;
O1220972	249.407	1.13093	0.343116	-3.29606	0.000980514	0.00582699	STM14_3458:putative periplasmic binding protein;STM14_3459:putative ATP-binding protein;STM14_3460:putative permease;STM14_3461:putative permease;
O1220973	1089.92	1.2693	0.408107	-3.11021	0.00186953	0.00999006	STM14_3467:putative cytoplasmic protein;STM14_3468:needle complex export protein;STM14_3469:needle complex assembly protein;STM14_3470:needle complex inner membrane lipoprotein;STM14_3471:needle complex minor subunit;STM14_3472:needle complex major subunit;STM14_3473:needle complex inner membrane protein;
O1220974	24.7876	1.55709	0.513578	-3.03185	0.00243058	0.0124501	STM14_3475:invasion protein regulator HilC;STM14_3476:invasion protein precursor;
O1220979	10.2648	2.17342	0.822939	-2.64105	0.00826496	0.0337885	STM14_3489:surface presentation of antigens protein SpaP;STM14_3490:surface presentation of antigens protein SpaO;STM14_3491:needle length control protein;STM14_3492:needle complex assembly protein;STM14_3493:ATP synthase SpaL;
O1220980	349.247	1.19969	0.34539	-3.47344	0.000513839	0.00332778	STM14_3494:secretion chaperone;STM14_3495:needle complex export protein;STM14_3496:invasion protein;STM14_3497:outer membrane secretin precursor;STM14_3498:invasion regulatory protein;
O3410908	54.4602	2.46073	0.456048	-5.39577	6.82291e-08	1.17345e-06	STM14_3499:needle complex outer membrane lipoprotein precursor;
O1220988	66.0693	4.45985	0.531208	-8.39568	4.63222e-17	4.45551e-15	STM14_3536:hypothetical protein;STM14_3537:adenylylsulfate kinase;STM14_3538:sulfate adenylyltransferase subunit 1;STM14_3539:sulfate adenylyltransferase subunit 2;
O1220989	49.8514	-1.34608	0.518069	2.59827	0.00936957	0.0368678	STM14_3541:hypothetical protein;STM14_3542:putative cytoplasmic protein;STM14_3543:putative cytoplasmic protein;STM14_3544:putative cytoplasmic protein;STM14_3545:putative cytoplasmic protein;STM14_3546:putative transposase;STM14_3547:putative cytoplasmic protein;STM14_3548:putative helicase;
O1220990	53.6974	3.01082	0.619824	-4.85754	1.18853e-06	1.53563e-05	STM14_3551:phosphoadenosine phosphosulfate reductase;STM14_3552:sulfite reductase subunit beta;STM14_3553:sulfite reductase subunit alpha;
O3410923	31.5703	3.26269	0.655541	-4.9771	6.45442e-07	9.06062e-06	STM14_3554:putative 6-pyruvoyl tetrahydrobiopterin synthase;
O3410924	52.3275	-1.53231	0.489312	3.13157	0.00173877	0.00940747	STM14_3555:putative metal-dependent hydrolase;
O1220993	454.78	-1.23231	0.273459	4.50638	6.59416e-06	7.54407e-05	STM14_3564:GDP/GTP pyrophosphokinase;STM14_3565:23S rRNA 5-methyluridine methyltransferase;
O1220995	1066.47	-1.58298	0.241361	6.55856	5.43289e-11	1.56769e-09	STM14_3572:flavodoxin;STM14_3573:tRNA pseudouridine synthase C;STM14_3574:putative cytoplasmic protein;
O3411689	15627.2	-2.33191	0.244456	9.53917	1.43984e-21	2.49284e-19	STM14_3575:small regulatory RNA CsrB;
O1220996	230.132	-1.32617	0.427461	3.10243	0.00191939	0.0102145	STM14_3578:putative nucleotide binding protein;STM14_3579:hypothetical protein;
O3410933	25.1411	-2.1052	0.669938	3.14238	0.00167581	0.00910478	STM14_3580:hypothetical protein;
O3410939	125.304	1.4517	0.315373	-4.60312	4.16199e-06	5.00402e-05	STM14_3603:murein transglycosylase A;
O3411691	2077.17	1.10263	0.387407	-2.84617	0.00442489	0.0207802	STM14_3605:Met tRNA;
O3410940	131.27	2.35313	0.285972	-8.22851	1.89559e-16	1.64095e-14	STM14_3606:N-acetylmuramoyl-L-alanine amidase;
O3410941	918.122	1.37355	0.375893	-3.65409	0.000258097	0.00181647	STM14_3607:N-acetylglutamate synthase;
O1221008	425.644	1.54398	0.242713	-6.36135	1.99983e-10	5.40994e-09	STM14_3633:hypothetical protein;STM14_3634:bifunctional acyl-[acyl carrier protein] synthetase/2-acylglycerophosphoethanolamine acyltransferase;
O3410950	39.5599	4.24967	0.482111	-8.81473	1.19973e-18	1.29821e-16	STM14_3638:diaminopimelate decarboxylase;
O3410958	829.523	-1.24049	0.253624	4.89105	1.003e-06	1.32472e-05	STM14_3649:hypothetical protein;
O3410968	338.161	1.00352	0.274389	-3.65731	0.00025488	0.00180361	STM14_3667:putative inner membrane protein;
O3410971	159.95	-2.25881	0.631237	3.57839	0.000345713	0.0023503	STM14_3682:putative hemolysin;
O1221019	1584.01	3.90765	0.370915	-10.5352	5.94818e-26	1.93093e-23	STM14_3688:glycine cleavage system protein H;STM14_3689:glycine cleavage system aminomethyltransferase T;
O3410982	30472.5	-1.99205	0.348493	5.71619	1.08936e-08	2.15959e-07	STM14_3698:putative ligase;
O3410986	3096.31	-1.12832	0.227715	4.95496	7.23451e-07	9.88843e-06	STM14_3705:hypothetical protein;
O3410990	246.107	1.19644	0.275014	-4.35046	1.3585e-05	0.000148236	STM14_3717:transketolase;
O3410992	123.651	-1.68181	0.405666	4.1458	3.38632e-05	0.000318633	STM14_3719:putative Zn-dependent protease;
O3410993	653.644	-1.19986	0.32405	3.7027	0.000213316	0.00156935	STM14_3720:agmatinase;
O1221024	81.8028	-5.17172	0.699805	7.39023	1.46579e-13	6.67835e-12	STM14_3723:putative mannitol dehydrogenase;STM14_3724:putative malate/L-lactate dehydrogenase;STM14_3725:putative zinc-binding dehydrogenase;STM14_3726:putative mannitol dehydrogenase;
O1221027	69.5083	2.68846	0.402449	-6.68025	2.3853e-11	7.37455e-10	STM14_3738:hypothetical protein;STM14_3739:glutathione synthetase;
O3411005	126.159	-1.16162	0.452286	2.56833	0.0102191	0.0393225	STM14_3750:L-asparaginase II;
O1221030	80.6276	2.58643	0.613898	-4.21312	2.51865e-05	0.000246827	STM14_3752:hypothetical protein;STM14_3753:hypothetical protein;STM14_3754:tRNA (guanine-N(7))-methyltransferase;
O3411693	482.999	4.22833	0.492477	-8.58583	9.01795e-18	9.36785e-16	STM14_3765:Phe tRNA;
O1221035	34.2002	-1.58749	0.573159	2.76972	0.0056105	0.0247797	STM14_3782:putative NAD-dependent aldehyde dehydrogenase;STM14_3783:hypothetical protein;
O3411027	71.3437	-1.2113	0.373421	3.2438	0.00117945	0.00673194	STM14_3804:putative glutathione S-transferase YghU;
O1221040	151.411	-4.98728	0.537837	9.27285	1.81233e-20	2.76861e-18	STM14_3805:hypothetical protein;STM14_3806:putative periplasmic ferrichrome-binding protein;
O1221041	616.515	-1.82946	0.33311	5.49206	3.97262e-08	7.06637e-07	STM14_3807:hydrogenase 2 accessory protein HypG;STM14_3808:hydrogenase nickel incorporation protein HybF;STM14_3809:hydrogenase 2-specific chaperone;STM14_3810:hydrogenase 2 maturation endopeptidase;STM14_3811:hydrogenase 2 large subunit;STM14_3812:putative hydrogenase 2 b cytochrome subunit;STM14_3813:hydrogenase 2 protein HybA;STM14_3814:hydrogenase 2 small subunit;
O3411029	99.1872	-5.08943	1.48101	3.43646	0.000589379	0.00376999	STM14_3816:putative cytoplasmic protein;
O1221042	75.6492	1.23051	0.355411	-3.46222	0.00053574	0.00346099	STM14_3821:putative cytoplasmic protein;STM14_3822:putative cytoplasmic protein;
O3411041	10.6673	3.42559	0.929471	-3.68552	0.000228234	0.00166496	STM14_3839:hypothetical protein;
O3411043	180.388	1.85991	0.278684	-6.6739	2.49097e-11	7.61064e-10	STM14_3846:DNA topoisomerase IV subunit A;
O3411049	156.534	-1.78999	0.503252	3.55685	0.000375322	0.00251863	STM14_3871:glycogen synthesis protein GlgS;
O3411054	81.4661	2.75141	0.370566	-7.42487	1.12889e-13	5.42915e-12	STM14_3882:bifunctional dihydroneopterin aldolase/dihydroneopterin triphosphate 2'-epimerase;
O3411058	405.579	2.3531	0.348003	-6.76174	1.36347e-11	4.3182e-10	STM14_3886:30S ribosomal protein S21;
O3411062	67.8388	2.75943	0.369474	-7.46855	8.10857e-14	4.12901e-12	STM14_3893:putative methyl-accepting chemotaxis protein;
O1221059	827.348	-2.38937	0.481815	4.9591	7.08209e-07	9.73132e-06	STM14_3896:putrescine--2-oxoglutarate aminotransferase;STM14_3897:hypothetical protein;
O1221061	109.097	1.19966	0.312503	-3.83889	0.000123593	0.000955273	STM14_3908:hypothetical protein;STM14_3909:hypothetical protein;
O1221062	37.9526	-1.63973	0.492625	3.32855	0.000872994	0.00527247	STM14_3910:hypothetical protein;STM14_3911:putative inner membrane protein;STM14_3912:putative inner membrane protein;STM14_3913:putative inner membrane protein;
O3411074	76.226	2.09932	0.344285	-6.0976	1.0767e-09	2.58907e-08	STM14_3927:DNA-binding transcriptional activator TdcA;
O1221069	451.12	-1.14761	0.355235	3.23056	0.00123549	0.00702093	STM14_3936:putative sugar kinase;STM14_3937:AGA operon transcriptional repressor;
O3411079	106.024	-1.21017	0.400607	3.02085	0.00252069	0.0128106	STM14_3950:putative nucleoside-diphosphate-sugar epimerase;
O3411083	57.2168	-2.06656	0.528677	3.90892	9.2708e-05	0.000761907	STM14_3958:hypothetical protein;
O1221077	248.723	1.86415	0.607596	-3.06807	0.00215449	0.0112844	STM14_3969:translation initiation factor IF-2;STM14_3970:transcription elongation factor NusA;STM14_3971:hypothetical protein;
O3411696	203.384	1.11685	0.380783	-2.93304	0.00335663	0.0164786	STM14_3972:Met tRNA;
O3411091	73.4865	1.21781	0.315165	-3.86404	0.000111526	0.000877822	STM14_3981:ATP-dependent metalloprotease;
O3411093	37.5734	1.54066	0.44627	-3.4523	0.00055583	0.00356417	STM14_3983:RNA-binding protein YhbY;
O1221081	297.852	2.83152	0.46535	-6.08471	1.16701e-09	2.73038e-08	STM14_3990:50S ribosomal protein L27;STM14_3991:50S ribosomal protein L21;
O3411099	155.328	-4.0505	0.518111	7.81782	5.37439e-15	3.7113e-13	STM14_4013:hypothetical protein;
O1221089	519.719	2.10491	0.290947	-7.23469	4.66584e-13	1.95438e-11	STM14_4032:ClpXP protease specificity-enhancing factor;STM14_4033:stringent starvation protein A;
O1221090	123.983	1.39584	0.500079	-2.79124	0.00525058	0.0236322	STM14_4036:30S ribosomal protein S9;STM14_4037:50S ribosomal protein L13;
O3411108	42.3531	1.90214	0.429495	-4.42878	9.47691e-06	0.000105177	STM14_4038:putative ATPase;
O1221096	15.1184	-1.94267	0.745579	2.60559	0.00917173	0.0361991	STM14_4058:p-hydroxybenzoic acid efflux subunit AaeB;STM14_4059:p-hydroxybenzoic acid efflux subunit AaeA;STM14_4060:hypothetical protein;
O1221099	139.372	1.07184	0.313197	-3.42226	0.000621023	0.00395293	STM14_4075:hypothetical protein;STM14_4076:acetyl-CoA carboxylase biotin carboxyl carrier protein subunit;STM14_4077:acetyl-CoA carboxylase biotin carboxylase subunit;
O1221100	210.456	-1.32858	0.298073	4.45724	8.30219e-06	9.25355e-05	STM14_4078:hypothetical protein;STM14_4079:sodium/panthothenate symporter;STM14_4080:50S ribosomal protein L11 methyltransferase;
O3411122	34.2823	1.66675	0.431354	-3.864	0.000111545	0.000877822	STM14_4085:hypothetical protein;
O3411701	1192.5	2.94186	0.599973	-4.90333	9.42273e-07	1.26138e-05	STM14_4099:23S ribosomal RNA;
O1221107	536.59	3.23397	0.425536	-7.59975	2.96694e-14	1.7919e-12	STM14_4117:50S ribosomal protein L17;STM14_4118:DNA-directed RNA polymerase subunit alpha;STM14_4119:30S ribosomal protein S4;STM14_4120:30S ribosomal protein S11;STM14_4121:30S ribosomal protein S13;
O1221108	4727.42	-1.81486	0.351531	5.16274	2.43357e-07	3.85365e-06	STM14_4122:50S ribosomal protein L36;STM14_4123:preprotein translocase subunit SecY;STM14_4124:50S ribosomal protein L15;STM14_4125:50S ribosomal protein L30;STM14_4126:30S ribosomal protein S5;STM14_4127:50S ribosomal protein L18;STM14_4128:50S ribosomal protein L6;STM14_4129:30S ribosomal protein S8;STM14_4130:30S ribosomal protein S14;STM14_4131:50S ribosomal protein L5;STM14_4132:50S ribosoma…
O3411133	4067.5	-1.02782	0.252441	4.07153	4.67052e-05	0.000419701	STM14_4146:bacterioferritin, iron storage and detoxification protein;
O1221110	158.716	-2.24597	0.326793	6.87277	6.29687e-12	2.09653e-10	STM14_4147:bacterioferritin-associated ferredoxin;STM14_4148:elongation factor Tu;STM14_4149:elongation factor Tu;STM14_4150:elongation factor G;STM14_4151:30S ribosomal protein S7;STM14_4152:30S ribosomal protein S12;
O3411134	1284.13	1.48457	0.34135	-4.34911	1.36693e-05	0.000148532	STM14_4157:FKBP-type peptidyl-prolyl cis-trans isomerase;
O3411138	154.07	-1.46262	0.349537	4.18444	2.8587e-05	0.000273753	STM14_4164:putative ABC transporter ATP-binding protein;
O3411142	889.614	1.37543	0.495251	-2.77724	0.00548221	0.024379	STM14_4179:peptidyl-prolyl cis-trans isomerase A;
O1221117	32.639	3.33207	0.481338	-6.92252	4.43687e-12	1.53634e-10	STM14_4183:nitrite reductase large subunit;STM14_4184:nitrite reductase small subunit;
O1221118	24.4943	-1.86024	0.687233	2.70685	0.00679242	0.0291088	STM14_4186:nitrite transporter NirC;STM14_4187:siroheme synthase;
O1221120	27.0426	-1.66992	0.539731	3.09399	0.00197485	0.0104454	STM14_4192:hypothetical protein;STM14_4193:tryptophanyl-tRNA synthetase;STM14_4194:phosphoglycolate phosphatase;STM14_4195:ribulose-phosphate 3-epimerase;STM14_4196:DNA adenine methylase;
O1221130	123.927	4.25555	0.475163	-8.95598	3.36721e-19	4.16411e-17	STM14_4237:RNA 3'-terminal-phosphate cyclase;STM14_4238:putative cytoplasmic protein;
O3411163	168.832	1.57615	0.604514	-2.6073	0.00912598	0.036149	STM14_4246:glycerol-3-phosphate dehydrogenase;
O3411164	127.95	-3.21584	0.429179	7.49301	6.7314e-14	3.49629e-12	STM14_4249:glycerol dehydrogenase;
O1221135	1152.11	-1.41151	0.256904	5.4943	3.9226e-08	7.03749e-07	STM14_4254:glycogen phosphorylase;STM14_4255:glycogen synthase;STM14_4256:glucose-1-phosphate adenylyltransferase;STM14_4257:glycogen debranching protein;STM14_4258:glycogen branching protein;
O1221136	473.986	1.46865	0.301944	-4.86399	1.15044e-06	1.49384e-05	STM14_4259:hypothetical protein;STM14_4260:aspartate-semialdehyde dehydrogenase;
O1221138	11.9257	1.64639	0.664354	-2.47818	0.0132054	0.0485756	STM14_4264:low affinity gluconate transporter;STM14_4265:gluconate kinase;
O3411168	152.536	1.55073	0.267454	-5.79811	6.70653e-09	1.37141e-07	STM14_4268:putative dehydrogenase;
O3411172	55.2383	1.43038	0.515242	-2.77613	0.00550105	0.0244209	STM14_4294:high-affinity branched-chain amino acid transporter;
O1221147	33.9611	1.58172	0.421753	-3.75034	0.000176592	0.0013293	STM14_4297:cell division protein FtsX;STM14_4298:cell division protein FtsE;STM14_4299:cell division protein FtsY;
O3411175	14.2638	2.56012	0.793616	-3.2259	0.00125579	0.0071052	STM14_4302:putative inner membrane protein;
O3411177	376.091	1.38939	0.452869	-3.06797	0.0021552	0.0112844	STM14_4304:zinc/cadmium/mercury/lead-transporting ATPase;
O3411179	267.59	1.36005	0.278992	-4.87488	1.08874e-06	1.42801e-05	STM14_4306:cell developmental protein SirA;
O1221151	94.713	-1.64095	0.420155	3.90559	9.39961e-05	0.000767635	STM14_4313:putative ABC transport protein;STM14_4314:putative ABC-type multidrug transport system ATPase component;STM14_4315:hypothetical protein;
O3411185	5229.31	-1.32507	0.269257	4.92121	8.60116e-07	1.16949e-05	STM14_4319:universal stress protein UspB;
O3411205	70.4314	-1.07221	0.397265	2.69898	0.00695524	0.0297085	STM14_4348:ketodeoxygluconokinase;
O3411206	146.881	2.22104	0.395173	-5.62042	1.90498e-08	3.61111e-07	STM14_4349:putative Zn-dependent peptidase;
O3411207	199.175	-2.24175	0.336302	6.66587	2.63096e-11	7.9449e-10	STM14_4350:hypothetical protein;
O3411211	1060.38	1.37014	0.230196	-5.95204	2.64818e-09	5.77926e-08	STM14_4382:phosphoethanolamine transferase;
O3411215	56.1124	-1.66973	0.498587	3.34892	0.000811268	0.00496902	STM14_4389:putative lipase;
O3411223	525.082	1.39891	0.352209	-3.97181	7.13284e-05	0.000607344	STM14_4399:major cold shock protein;
O3411237	292.74	-2.70275	0.390633	6.91888	4.55215e-12	1.55552e-10	STM14_4438:aldehyde dehydrogenase B;
O3411238	90.5232	-1.30444	0.370964	3.51636	0.000437509	0.00289112	STM14_4439:putative transcriptional regulator;
O3411239	319.603	-1.32376	0.277808	4.76503	1.8883e-06	2.351e-05	STM14_4442:glutathione S-transferase;
O1221175	48.2877	2.66818	0.493414	-5.4076	6.38764e-08	1.11334e-06	STM14_4451:L-lactate permease;STM14_4452:DNA-binding transcriptional repressor LldR;STM14_4453:L-lactate dehydrogenase;STM14_4454:putative tRNA/rRNA methyltransferase YibK;
O1221177	43.1586	1.80437	0.442701	-4.07581	4.58537e-05	0.000416043	STM14_4459:serine acetyltransferase;STM14_4460:NAD(P)H-dependent glycerol-3-phosphate dehydrogenase;STM14_4461:preprotein translocase subunit SecB;STM14_4462:glutaredoxin 3;STM14_4463:putative rhodanese-like sulfurtransferase;
O3411247	264.551	1.80756	0.319816	-5.65186	1.58718e-08	3.05326e-07	STM14_4476:lipopolysaccharide core biosynthesis protein;
O1221182	349.169	1.94243	0.259112	-7.49648	6.55536e-14	3.47434e-12	STM14_4481:putative inner membrane protein;STM14_4482:lipopolysaccharide core biosynthetic protein;STM14_4483:glucosyltransferase I;STM14_4484:lipopolysaccharide core biosynthesis protein;
O1221183	165.896	2.36756	0.331682	-7.13805	9.46617e-13	3.63447e-11	STM14_4486:3-deoxy-D-manno-octulosonic-acid transferase;STM14_4487:phosphopantetheine adenylyltransferase;
O3411249	230.296	-1.71644	0.466486	3.67951	0.000233679	0.00168574	STM14_4488:formamidopyrimidine-DNA glycosylase;
O1221184	1503.83	2.71126	0.357384	-7.58641	3.28882e-14	1.85675e-12	STM14_4489:50S ribosomal protein L33;STM14_4490:50S ribosomal protein L28;
O1221186	194.004	2.88316	0.379548	-7.59632	3.04674e-14	1.79827e-12	STM14_4495:orotate phosphoribosyltransferase;STM14_4496:ribonuclease PH;
O3411267	165.302	-1.35058	0.408102	3.30941	0.000934915	0.00559441	STM14_4534:putative inner membrane protein;
O1221201	46.5267	-3.19473	0.613018	5.21149	1.87334e-07	3.00312e-06	STM14_4562:hypothetical protein;STM14_4563:phosphotransferase system mannitol/fructose-specific IIA component;STM14_4564:putative regulatory protein;
O1221204	297.51	-1.84	0.370036	4.97248	6.6102e-07	9.21736e-06	STM14_4572:putative cytoplasmic protein;STM14_4573:putative L-fucose permease;STM14_4574:putative sugar kinase;
O3411286	31.6278	1.45525	0.519383	-2.80188	0.0050806	0.0230781	STM14_4585:integral membrane protein;
O3411292	120.472	-2.30889	0.531147	4.34698	1.38022e-05	0.000149351	STM14_4597:hypothetical protein;
O1221208	1003.53	-2.76185	0.404057	6.83529	8.18401e-12	2.69036e-10	STM14_4599:heat shock chaperone IbpB;STM14_4600:heat shock protein IbpA;
O1221210	15.0475	-2.37101	0.758928	3.12415	0.00178319	0.00961528	STM14_4613:chaperone protein TorD;STM14_4614:trimethylamine N-oxide reductase subunit;STM14_4615:trimethylamine N-oxide reductase cytochrome c-like subunit;
O3411299	42.9205	-1.19519	0.416073	2.87254	0.00407183	0.0194386	STM14_4618:hybrid sensory histidine kinase TorS;
O3411301	588.189	-1.30933	0.325508	4.02242	5.76028e-05	0.000504015	STM14_4627:putative transcriptional regulator;
O1221214	45.4403	-1.79124	0.584767	3.06316	0.00219014	0.0114213	STM14_4628:DNA gyrase subunit B;STM14_4629:recombination protein F;
O1221215	243.502	-1.40654	0.313289	4.4896	7.13568e-06	8.0923e-05	STM14_4631:DNA polymerase III subunit beta;STM14_4632:chromosomal replication initiation protein;
O1221219	46.0995	1.70076	0.45231	-3.76018	0.000169792	0.00128932	STM14_4644:putative cytoplasmic protein;STM14_4645:putative oxidoreductase;
O3411307	86.5157	1.77251	0.426054	-4.1603	3.17833e-05	0.000302349	STM14_4652:phosphate transporter subunit;
O1221222	127.477	2.56567	0.336364	-7.62765	2.3907e-14	1.51431e-12	STM14_4666:F0F1 ATP synthase subunit C;STM14_4667:F0F1 ATP synthase subunit A;STM14_4668:F0F1 ATP synthase subunit I;
O3411316	146.525	1.78879	0.415374	-4.30646	1.65891e-05	0.000175844	STM14_4672:flavodoxin;
O3411318	1441.09	-2.16995	0.388922	5.57941	2.41334e-08	4.44499e-07	STM14_4674:asparagine synthetase AsnA;
O1221224	78.5035	1.33667	0.399091	-3.3493	0.00081017	0.00496902	STM14_4675:hypothetical protein;STM14_4676:regulatory ATPase RavA;
O1221225	217.048	3.30631	0.398507	-8.29675	1.07001e-16	9.5821e-15	STM14_4678:D-ribose pyranase;STM14_4679:D-ribose transporter ATP-binding protein;STM14_4680:ribose ABC transporter permease;STM14_4681:D-ribose transporter subunit RbsB;
O3411706	203.874	1.42194	0.550416	-2.58338	0.00978361	0.0379224	STM14_4687:Glu tRNA;
O3411707	1121.15	3.45084	0.60576	-5.69671	1.22143e-08	2.40308e-07	STM14_4688:23S ribosomal RNA;
O3411323	142.948	-1.86898	0.449561	4.15734	3.21981e-05	0.000305177	STM14_4705:DNA-binding transcriptional regulator IlvY;
O3411324	76.0548	4.92305	0.527343	-9.33559	1.00429e-20	1.6301e-18	STM14_4706:ketol-acid reductoisomerase;
O3411329	1671.69	1.00799	0.298077	-3.38163	0.00072057	0.0045201	STM14_4715:transcription termination factor Rho;
O3411330	61.9203	1.04363	0.384254	-2.716	0.00660761	0.0284577	STM14_4728:putative transport protein YifK;
O3411715	6233.06	6.47392	0.543692	-11.9073	1.08382e-32	5.62937e-30	STM14_4732:Pro tRNA;
O3411331	64.8865	1.19484	0.372856	-3.20457	0.00135263	0.00755435	STM14_4733:hypothetical protein;
O3411339	1603.23	1.65228	0.323247	-5.1115	3.19607e-07	4.88246e-06	STM14_4754:magnesium/nickel/cobalt transporter CorA;
O3411340	91.8317	1.58915	0.372516	-4.266	1.9901e-05	0.000206732	STM14_4763:homoserine/homoserine lactone efflux protein;
O3411341	30.8826	2.28346	0.544272	-4.19544	2.72338e-05	0.000263904	STM14_4767:metE/metH regulator;
O3411362	262978	-1.41998	0.226706	6.26352	3.76387e-10	9.77477e-09	STM14_4814:hypothetical protein;
O3411365	379.014	2.14974	0.558358	-3.85011	0.000118064	0.000926323	STM14_4822:GTP-binding protein;
O1221255	1447.19	-1.34234	0.251829	5.33036	9.80177e-08	1.62135e-06	STM14_4849:formate dehydrogenase accessory protein FdhE;STM14_4850:formate dehydrogenase-O subunit gamma;STM14_4851:formate dehydrogenase-O beta subunit;STM14_4852:formate dehydrogenase alpha subunit;
O3411371	53.7021	1.15682	0.429639	-2.69253	0.00709117	0.0301404	STM14_4861:hypothetical protein;
O3411375	37.882	-1.61231	0.553404	2.91343	0.00357477	0.0174505	STM14_4870:transcriptional activator RhaR;
O3411378	265.199	2.18152	0.308196	-7.07836	1.45868e-12	5.41171e-11	STM14_4878:superoxide dismutase;
O3411379	616.34	1.66987	0.514713	-3.24429	0.00117746	0.00673194	STM14_4883:repressor CpxP;
O1221264	174.538	4.37815	0.473246	-9.25133	2.21711e-20	3.1988e-18	STM14_4887:sulfate transporter subunit;STM14_4888:CDP-diacylglycerol pyrophosphatase;
O1221266	139.155	1.33979	0.313467	-4.27411	1.91902e-05	0.000200149	STM14_4893:hypothetical protein;STM14_4894:putative cytoplasmic protein;
O3411383	310.297	-1.18093	0.369539	3.19569	0.00139497	0.00775749	STM14_4897:putative transcriptional repressor;
O3411386	93.2675	1.28211	0.48906	-2.62158	0.0087523	0.0350922	STM14_4907:hypothetical protein;
O3411387	158.867	-1.11851	0.396235	2.82284	0.00475996	0.022035	STM14_4908:putative inner membrane protein;
O1221272	854.521	-1.02115	0.249396	4.0945	4.23074e-05	0.000385517	STM14_4916:hypothetical protein;STM14_4917:ribonuclease activity regulator protein RraA;
O3411388	42.4149	2.41956	0.433569	-5.58058	2.39717e-08	4.44499e-07	STM14_4918:1,4-dihydroxy-2-naphthoate octaprenyltransferase;
O3411389	374.701	-2.20967	0.29968	7.37341	1.66316e-13	7.44692e-12	STM14_4924:50S ribosomal protein L31;
O3411393	558.874	-1.00021	0.359335	2.78351	0.00537737	0.0241192	STM14_4932:putative cytoplasmic protein;
O3411397	1158.34	1.88686	0.48807	-3.86596	0.000110655	0.000877822	STM14_4936:hydroperoxidase;katG
O3411398	271.162	-2.03165	0.471607	4.30793	1.6479e-05	0.000175393	STM14_4937:hypothetical protein;
O1221277	221.589	-1.8441	0.411753	4.47867	7.51085e-06	8.44402e-05	STM14_4939:glycerol dehydrogenase;STM14_4940:fructose-6-phosphate aldolase;STM14_4941:PEP-protein phosphotransferase;
O3411402	2719.95	-1.78422	0.290277	6.14662	7.91538e-10	1.93927e-08	STM14_4952:hypothetical protein;
O1221281	663.259	2.13859	0.32668	-6.54643	5.893e-11	1.66349e-09	STM14_4956:N-acetyl-gamma-glutamyl-phosphate reductase;STM14_4957:acetylglutamate kinase;
O1221286	1452.01	5.32983	0.42267	-12.6099	1.86224e-36	1.20906e-33	STM14_4982:elongation factor Tu;STM14_4983:hypothetical protein;
O1221288	376.232	2.89596	0.481349	-6.01635	1.78394e-09	3.99388e-08	STM14_4986:50S ribosomal protein L11;STM14_4987:50S ribosomal protein L1;
O1221294	10127.2	1.5166	0.296041	-5.12293	3.00817e-07	4.62262e-06	STM14_5011:transcriptional regulator HU subunit alpha;STM14_5012:putative inner membrane protein;
O3411417	2768.91	-6.53437	0.306359	21.3291	6.09781e-101	1.5836e-97	STM14_5013:zinc resistance protein zraP_repressor;
O1221295	26.9521	1.45533	0.541321	-2.68848	0.00717779	0.0303595	STM14_5014:sensor protein ZraS;STM14_5015:transcriptional regulatory protein ZraR;
O3411732	197.078	1.47811	0.583759	-2.53206	0.0113393	0.0429274	STM14_5022:Glu tRNA;
O3411733	1122.56	3.54921	0.582254	-6.09564	1.09003e-09	2.59707e-08	STM14_5023:23S ribosomal RNA;
O3411424	207.719	1.19782	0.45055	-2.65858	0.00784716	0.0325566	STM14_5028:homoserine O-succinyltransferase;
O3411437	180.175	1.48502	0.298902	-4.96826	6.75558e-07	9.33204e-06	STM14_5074:aspartate kinase III;
O3411442	162.792	3.45275	0.41224	-8.37558	5.49509e-17	5.0967e-15	STM14_5086:maltose/maltodextrin transporter ATP-binding protein;
O3411448	38.6259	-2.40114	0.610764	3.93138	8.44601e-05	0.000698544	STM14_5102:phage shock protein G;
O1221311	28.4376	2.58833	0.479937	-5.39306	6.9268e-08	1.18348e-06	STM14_5104:replicative DNA helicase;STM14_5105:alanine racemase;STM14_5106:aromatic amino acid aminotransferase;
O1221312	273.064	-1.3637	0.330113	4.13103	3.61143e-05	0.00033737	STM14_5108:putative cytoplasmic protein;STM14_5109:putative cytoplasmic protein;
O3411457	15.5369	1.76063	0.670528	-2.62574	0.00864618	0.0347587	STM14_5126:diguanylate cyclase;
O3411464	11.2208	1.91824	0.685515	-2.79825	0.00513811	0.0232874	STM14_5133:hypothetical protein;
O3411468	60.3182	-1.00026	0.392724	2.54699	0.0108658	0.0414148	STM14_5141:acetyl-CoA synthetase;
O3411476	15.3834	-6.08532	1.32964	4.57667	4.72426e-06	5.60224e-05	STM14_5161:proline/glycine betaine transporter;
O3411477	1757.58	-1.21747	0.301765	4.03451	5.47153e-05	0.000484968	STM14_5162:hypothetical protein;
O3411483	46.8053	-1.64762	0.503559	3.27195	0.00106807	0.00627551	STM14_5175:putative cytoplasmic protein;
O1221326	154.075	-1.38804	0.425533	3.26189	0.00110673	0.00645884	STM14_5178:putative anaerobic dimethylsulfoxide reductase subunit A;STM14_5179:putative anaerobic dimethylsulfoxide reductase subunit B;STM14_5180:putative anaerobic dimethylsulfoxide reductase subunit C;STM14_5181:putative anaerobic dehydrogenase component;
O3411496	1566.9	8.97234	0.588046	-15.2579	1.45893e-52	1.89442e-49	STM14_5196:hypothetical protein;
O3411501	1560.74	-1.12269	0.306092	3.66781	0.000244632	0.00174058	STM14_5209:putative outer membrane lipoprotein;
O1221331	260.322	1.44556	0.280908	-5.14604	2.6605e-07	4.16223e-06	STM14_5212:hypothetical protein;STM14_5213:putative aminomutase;
O1221333	1876.89	-1.33387	0.267925	4.97852	6.40713e-07	9.04311e-06	STM14_5220:fumarate reductase subunit D;STM14_5221:fumarate reductase subunit C;STM14_5222:fumarate reductase iron-sulfur subunit;STM14_5223:fumarate reductase flavoprotein subunit;
O1221335	179.311	1.28435	0.427744	-3.00261	0.00267677	0.0134796	STM14_5228:hypothetical protein;STM14_5229:phosphatidylserine decarboxylase;
O3411518	48.8352	-3.24557	0.608738	5.33165	9.73261e-08	1.62023e-06	STM14_5264:putative L-ascorbate 6-phosphate lactonase;
O1221344	137.437	1.58604	0.519777	-3.05139	0.00227786	0.0118076	STM14_5275:30S ribosomal protein S6;STM14_5276:primosomal replication protein N;STM14_5277:30S ribosomal protein S18;STM14_5278:50S ribosomal protein L9;
O3411522	864.646	-1.71677	0.274216	6.26062	3.83445e-10	9.85948e-09	STM14_5280:putative cell envelope opacity-associated protein A;
O3411524	2965.68	-1.15788	0.21869	5.29462	1.19266e-07	1.9488e-06	STM14_5282:D-alanine/D-serine/glycine permease;
O3411532	71.6035	1.39277	0.434874	-3.2027	0.00136145	0.00758733	STM14_5301:inorganic pyrophosphatase;
O3411533	281.727	1.58032	0.249994	-6.32143	2.5916e-10	6.86773e-09	STM14_5304:UDP-N-acetylmuramate/L-alanyl-gamma-D-glutamyl- meso-diaminopimelate ligase;
O3411534	14.1049	1.5796	0.591668	-2.66975	0.00759075	0.0316424	STM14_5305:hypothetical protein;
O1221352	52.0648	1.40538	0.382975	-3.66965	0.000242885	0.00173289	STM14_5314:putative DNA-binding protein;STM14_5315:hypothetical protein;
O1221357	91.9417	-1.16286	0.387306	3.00244	0.00267827	0.0134796	STM14_5331:putative cytoplasmic protein;STM14_5332:putative cytoplasmic protein;STM14_5333:putative cytoplasmic protein;STM14_5334:putative inner membrane protein;STM14_5335:putative inner membrane protein;STM14_5336:dihydroorotase;STM14_5337:putative selenocysteine synthase;STM14_5338:4-hydroxy-2-oxoglutarate aldolase;STM14_5339:phosphotransferase system mannitol/fructose-specific IIA component;
O1221361	12.6039	2.19908	0.660283	-3.33051	0.000866864	0.00527247	STM14_5357:putative arginine repressor;STM14_5358:ornithine carbamoyltransferase;STM14_5359:hypothetical protein;STM14_5360:carbamate kinase;STM14_5361:arginine deiminase;
O3411555	43.8811	-1.7758	0.474173	3.74505	0.000180357	0.00134982	STM14_5363:putative cytoplasmic protein;
O3411556	375.971	2.40243	0.504221	-4.76463	1.89203e-06	2.351e-05	STM14_5364:ornithine carbamoyltransferase subunit I;
O1221366	10.7196	-2.34328	0.907003	2.58354	0.00977914	0.0379224	STM14_5377:L-idonate regulator;STM14_5378:L-idonate transport protein;STM14_5379:gluconate 5-dehydrogenase;STM14_5380:L-idonate 5-dehydrogenase;
O3411564	101.569	5.5485	0.762439	-7.27729	3.4058e-13	1.47414e-11	STM14_5385:putative integrase;
O3411566	247.154	-1.08077	0.409199	2.64119	0.00826163	0.0337885	STM14_5387:putative restriction endonuclease;
O1221368	757.59	-1.33116	0.451196	2.95029	0.00317479	0.0157346	STM14_5400:putative SAM-dependent methyltransferase;STM14_5401:hypothetical protein;
O3411576	162.548	3.36686	0.540113	-6.23362	4.55792e-10	1.16048e-08	STM14_5408:hypothetical protein;
O3411579	239	-1.09716	0.344817	3.18186	0.00146332	0.00808564	STM14_5411:DNA-binding transcriptional repressor UxuR;
O3411580	2534.53	-1.07419	0.354126	3.03335	0.00241851	0.0124148	STM14_5412:tryptophanyl-tRNA synthetase II;
O3411585	719.993	-1.253	0.296111	4.23154	2.32102e-05	0.000231834	STM14_5424:putative inner membrane protein;
O1221374	51.3838	1.93646	0.425021	-4.55615	5.20998e-06	6.12232e-05	STM14_5443:putative GTP-binding protein YjiA;STM14_5444:putative cytoplasmic protein;STM14_5445:putative carbon starvation protein;
O1221378	64.8973	1.00424	0.324295	-3.09667	0.00195705	0.0103724	STM14_5460:hypothetical protein;STM14_5461:hypothetical protein;
O3411607	24.3934	1.80684	0.547604	-3.29954	0.000968435	0.00576841	STM14_5469:putative inner membrane protein;
O3411608	15.0142	3.46306	0.841538	-4.11516	3.86918e-05	0.000358866	STM14_5473:16S ribosomal RNA m2G1207 methyltransferase;
O1221380	22.97	-2.33755	0.649805	3.59731	0.000321527	0.00221487	STM14_5474:hypothetical protein;STM14_5475:DNA polymerase III subunit psi;STM14_5476:ribosomal-protein-alanine N-acetyltransferase;STM14_5477:nucleotidase;
O3411609	70.2063	1.91349	0.381335	-5.01786	5.22499e-07	7.51691e-06	STM14_5478:peptide chain release factor 3;
O1221383	198.28	2.3494	0.52378	-4.48548	7.27499e-06	8.21441e-05	STM14_5487:deoxyribose-phosphate aldolase;STM14_5488:thymidine phosphorylase;STM14_5489:phosphopentomutase;
O3411618	417.824	1.37251	0.366055	-3.74945	0.00017722	0.00133017	STM14_5506:phosphoglycerate mutase;
O973039	727.828	1.1897	0.272831	-4.36057	1.29726e-05	0.000142753	STM14_5529:DNA replication;STM14_5530:replication of plasmid;STM14_5531:DNA replication;
O3409571	60.2454	-1.78937	0.421202	4.24824	2.15452e-05	0.000218112	STM14_5548:putative cytoplasmic protein;
O973043	272.969	-1.79348	0.557461	3.21722	0.00129438	0.00730764	STM14_5550:toxin addiction system: antidote;STM14_5551:toxin addiction system: toxin;STM14_5552:putative cytoplasmic protein;STM14_5553:putative cytoplasmic protein;STM14_5554:resolvase;STM14_5555:diguanylate cyclase;
O973044	309.826	-1.09398	0.407479	2.68476	0.00725814	0.0305996	STM14_5566:putative phosphoribulokinase / uridine kinase family;STM14_5567:putative integrase protein;STM14_5568:putative resolvase;
O3409584	33.3245	-1.46359	0.561578	2.6062	0.00915527	0.0361891	STM14_5570:putative cytoplasmic protein;
O973045	75.0586	-1.75336	0.455612	3.84837	0.000118906	0.000930119	STM14_5575:plasmid partition protein A;STM14_5576:plasmid partition protein B;
O3409593	122.631	-1.38202	0.408457	3.38352	0.000715636	0.00450001	STM14_5592:putative transglycosylase;
O1220501	81.5387	-1.60374	0.411782	3.89464	9.83446e-05	0.00079317	STM14_927:putative cytoplasmic protein;STM14_928:hypothetical protein;
O3409933	519.044	1.38727	0.279034	-4.97169	6.63707e-07	9.21736e-06	STM14_929:putative cytoplasmic protein;
O1220502	282.399	1.16818	0.38579	-3.02803	0.00246152	0.0125591	STM14_930:molybdenum cofactor biosynthesis protein A;STM14_931:molybdopterin biosynthetic protein B;STM14_932:molybdenum cofactor biosynthesis protein C;STM14_933:molybdopterin synthase small subunit;STM14_934:molybdopterin synthase large subunit;STM14_935:putative permease;
O3409938	21.5072	1.89178	0.610642	-3.09802	0.00194815	0.0103463	STM14_955:hypothetical protein;
O1220509	142.146	-1.49656	0.364431	4.10657	4.01586e-05	0.000368522	STM14_962:glutamine ABC transporter ATP-binding protein;STM14_963:glutamine ABC transporter permease;
O3409943	311.491	2.14811	0.423555	-5.07161	3.94467e-07	5.92156e-06	STM14_966:DNA starvation/stationary phase protection protein Dps;
O3409944	5383.27	-1.16848	0.24386	4.79162	1.65444e-06	2.07564e-05	STM14_971:outer membrane protein X;
O3409947	5486.94	-1.54031	0.267822	5.75123	8.85988e-09	1.79759e-07	STM14_974:hypothetical protein;
O3409948	67.9799	2.14656	0.378467	-5.67172	1.41368e-08	2.76039e-07	STM14_977:hypothetical protein;
O1220515	71.5307	1.18332	0.439172	-2.69443	0.00705083	0.0300181	STM14_986:hypothetical protein;STM14_987:molybdopterin biosynthesis protein MoeB;STM14_988:molybdopterin biosynthesis protein MoeA;
O3409954	1271.1	-2.97784	0.33595	8.86391	7.72552e-19	8.72312e-17	STM14_998:biofilm formation regulatory protein BssR;

## Sheet: Amoeba_Mammalian
Operon/Pathway	Description	Regulation in Acanthamoebae	Regulation in Macrophages	Regulation in Epithelial cells
General metabolism
Glycolysis		Down-regulation	Up-regulation	Up-regulation	Srikumar et al., 2015; Steeb et al., 2013
TCA cycle		Down-regulation	Up-regulation	Up-regulation	Srikumar et al., 2015; Steeb et al., 2013
GS		Up-regulation	Down-regulation	Down-regulation	Ahn et al., 2016
Oxidative phosphorylation		Down-regulation	Up-regulation	Up-regulation	Fitzsimmons et al., 2018
Lipopolysaccharide biosynthesis		Up-regulation	Down-regulation	Down-regulation	Riquelme et al., 2016; Dalebroux et al., 2014
Butanoate metabolism	Butanoate repress SPI-1 expression	Down-regulation	Up-regulation	Moderate	Gantois et al., 2006
Cysteine metabolism	Major role in oxidative stress response	Up-regulation	Up-regulation	Up-regulation	Turnbull et al., 2010
Arginine metabolism	Major role in acid stress response	Up-regulation	Up-regulation	Up-regulation	Rehfuss et al., 2011
Lysine metabolism	Involve in acid stress response	Up-regulation	Moderate	Down-regulation	Slonczewski J, 2010
SPI regions
SPI-1	invasion into host cells	Up-regulation	Down-regulation	Up-regulation	Ong et al., 2010; Srikumar et al., 2015
SPI-2	equired for survival inside phagosomes	Down-regulation	Up-regulation	Up-regulation	Ong et al., 2010; Srikumar et al., 2015
SPI-3	shown to be important for survival inside the host cells	Down-regulation	Down-regulation	Down-regulation	Ong et al., 2010
SPI-4	non-fimbrial adhesin responsible for the adhesion of Salmonella to epithelial cells	Moderate	Down-regulation	Up-regulation	Ong et al., 2010
SPI-5	SPI-5 plays a vital role in pathogenicity and encodes effectors of SPI-1 and SPI-2	Down-regulation	Up-regulation	Up-regulation	Ong et al., 2010
Motility and chemotaxis
flh	flagellar biosynthesis	Up-regulation	Down-regulation	Down-regulation	Srikumar et al., 2015
flg	flagellar biosynthesis	Up-regulation	Down-regulation	Up-regulation	Srikumar et al., 2015
fli	flagellar biosynthesis	Up-regulation	Down-regulation	Up-regulation	Knodler et al., 2010
flj	fliC repressor	Moderate	Down_regulation	Up-regulation	Srikumar et al., 2015
mot	flagellar motor protein	Up-regulation	Down-regulation	Down-regulation	Srikumar et al., 2015
che	chemotaxis	Up-regulation	Down-regulation	Down-regulation	Srikumar et al., 2015
Metal uptake
fhu	uptake of ferric hydroxamate	Up-regulation	Up-regulation	Up-regulation	Srikumar et al., 2015
ent	enterobactin exporter	Up-regulation	Up-regulation	Up-regulation	Crouch et al., 2008; Caza et al., 2001
fep	ferric enterobactin transport protein	Up-regulation	Up-regulation	Up-regulation	Crouch et al., 2008
sit	manganese/iron transport system	Down-regulation	Up-regulation	Up-regulation	Srikumar et al., 2015
suf	iron-sulfur cluster assembly	Up-regulation	Up-regulation	Up-regulation	Vergnes et al., 2015
fes	enterobactin/ferric enterobactin esterase	Up-regulation	Moderate	Moderate	Saha et al., 2019
corA	magnesium/nickel/cobalt transporter	Up-regulation	Moderate	Moderate	Papp-Wallace et al., 2008
mgtAB	magnesium transport	Moderate	Up-regulation	Up-regulation	Papp-Wallace et al., 2008
mgtC	Mg2+ transport protein	Moderate	Up-regulation	Up-regulation	Srikumar et al., 2015, Rehfuss et al., 2011
yhjJ	putative Zn-dependent peptidase	Up-regulation	Down-regulation	Down-regulation	Sudhakar et al., 2019
zraP	repressor of the zinc-responsive two-component regulator ZraSR	Down-regulation	Moderate	Moderate	Appia-Ayme et al., 2012
zraSR	ZraR is a response regulator, activated by its sensor kinase ZraS in a zinc-dependent response to envelope stress	Up-regulation	Moderate	Moderate	Appia-Ayme et al., 2012
yggG	putative Zn-dependent protease; SPI-1 effector	Down-regulation	Moderate	Up-regulation	Li et al., 2018
zntA	zinc/cadmium/mercury/lead-transporting ATPase	Up-regulation	Moderate	Moderate	Huang et al., 2017; Fitzsimmons et al., 2018
Oxidative stress response
ahpCF	alkyl hydroperoxide reductase	Up-regulation	Moderate	Moderate	Nirudodhi et al., 2011
grxA	glutaredoxin A	Up-regulation	Moderate	Moderate	Bjur et al., 2006
katG	hydroperoxidase	Up-regulation	Up-regulation	Up-regulation	McLean et al., 2010; Rehfuss et al., 2011
sodA	superoxide dismutase, manganese	Up-regulation	Down-regulation	Up-regulation	Wang et al., 2018
sodB	superoxide dismutase, iron	Down-regulation	Down-regulation	Down-regulation	Ellermeier and Slauch, 2008; Zheng et al., 2009
soxS	mar-sox-rob regulon activator	Moderate	Up-regulation	Up-regulation	Zheng et al., 2009
oxyR	hydrogen peroxide-inducible genes activator	Moderate	Up-regulation	Up-regulation	Zheng et al., 2009
mar	multiple antibiotic resistance	Moderate	Up-regulation	Up-regulation	Rehfuss et al., 2011
Stress response and transcriptional regulators
rpoE	sigma E factor of RNA polymerase, response to periplasmic stress	Moderate	Up-regulation	Up-regulation	Srikumar et al., 2015
rpoS	sigma S factor of RNA polymerase, major sigmafactor during stationary phase	Moderate	Moderate	Moderate	Eriksson et al., 2003
relA	GDP/GTP pyrophosphokinase	Down-regulation	Moderate	Moderate	Hee Sam Na et al., 2005
cspE	cold-shock protein	Down-regulation	Down-regulation	Down-regulation	Michaux et al., 2017
uspB	universall stress protoein	Down-regulation	Up-regulation	Moderate	Raspoet et al., 2011
uspE	universall stress protoein	Down-regulation	Moderate	Moderate	Raspoet et al., 2011
dnaKJ	heat shock protein	Down-regulation	Up-regulation	Up-regulation	Spector & Kenyon., 2011
ibpA	small heat-shock protein	Down-regulation	Moderate	Moderate	Eriksson et al., 2003
ibpB	small heat-shock protein	Down-regulation	Up-regulation	Up-regulation	Eriksson et al., 2003
hslJ	heat shock protein	Down-regulation	Down-regulation	Down-regulation	Hautefort et al., 2008
RprA	translational regulation of the stationary phase sigma factor RpoS	Down-regulation	Unknown	Unknown	Papenfort et al., 2015
yjeY	carbon starvation response	Down-regulation	Unknown	Unknown	Garai et al., 2016
cpxP	cpxRA repressor	Up-regulation	Up-regulation	Up-regulation	De la Cruz et al., 2015
cpxRA	response to envelope stress	Moderate	Moderate	Moderate	De la Cruz et al., 2015
hupA	HU nucleoid-associated proteins	Up-regulation	Down-regulation	Down-regulation	Mangan et al., 2010; Bai et al., 2014
sspAB	SspA expression increases with decreasing growth rate and is induced by glucose, nitrogen, phosphate or amino acid starvation	Up-regulation	Down-regulation	Moderate	Williams and Flickinfer, 1991; Duyask et al., 2020
